# Supplementary material for: Dynamics of Bacterial Community Structure in the Rhizosphere and Root Nodule of Soybean: Impacts of Growth Stages and Varieties
Source: Int J Mol Sci. 2021 May 25;22(11):5577. doi: 10.3390/ijms22115577 (PMC8197538; doi:10.3390/ijms22115577)
Supplement: Supplementary file 1 [file ijms-22-05577-s001.zip › Table S1.xls]

## Sheet: Sheet1
Table S1. Substrate utilization indicated by color development in Biolog Eco Plates
Carbon Source	Bulk Soil												V2												R1												R3												R5
	KA			PS			PW			TK			KA			PS			PW			TK			KA			PS			PW			TK			KA			PS			PW			TK			KA
Pryuvic Acid Methyl Ester	1.38633	±	0.0755932	1.249	±	0.829724	1.33733	±	0.0355293	1.38633	±	0.0755932	2.114	±	0.384368	1.219	±	0.116923	1.361	±	0.0835165	1.49833	±	0.164531	1.396	±	0.44659	1.841	±	0.84677	1.00033	±	0.254583	2.33167	±	0.340826	2.45833	±	0.112545	2.71367	±	0.112358	1.859	±	0.777211	2.49567	±	0.109153	2.763
Tween 40	1.75433	±	0.194582	1.69533	±	1.06119	1.136	±	0.710388	1.75433	±	0.194582	1.45767	±	0.052176	1.884	±	0.145454	1.49	±	0.0684178	1.63167	±	0.410792	1.12667	±	0.312964	1.86767	±	0.148096	0.880333	±	0.292584	1.645	±	0.263592	2.28533	±	0.218873	2.30367	±	0.0326548	2.115	±	0.260505	2.302	±	0.337871	2.367
Tween 80	1.77933	±	0.224656	1.69667	±	1.04087	1.30867	±	0.280236	1.77933	±	0.224656	1.58567	±	0.170195	1.671	±	0.117222	1.20367	±	0.0556447	1.27333	±	0.284553	0.368333	±	0.117738	2.18867	±	0.105396	1.651	±	0.440589	1.91233	±	0.181781	2.345	±	0.16889	2.267	±	0.184835	1.891	±	0.583165	2.362	±	0.0820549	2.38733
α-Cyclodextrin	1.10167	±	0.119274	0.654667	±	0.37858	0.911667	±	0.120372	1.10167	±	0.119274	1.408	±	0.120117	1.54133	±	0.776117	0.772333	±	0.571423	0.777333	±	0.574382	0.72	±	0.290463	2.09133	±	0.556019	0.927667	±	0.0821056	2.63633	±	0.049521	2.931	±	0.137815	2.633	±	0.205059	1.96333	±	0.0375411	2.609	±	0.095142	2.635
Glycogen	0.889333	±	0.352435	0.707333	±	0.250951	0.823	±	0.431322	0.889333	±	0.352435	1.68167	±	0.379317	0.969667	±	0.802846	0.383	±	0.426958	0.938667	±	0.163647	0.995	±	0.232768	1.826	±	0.185491	0.641333	±	0.0733848	2.133	±	0.0835943	2.37533	±	0.114605	2.147	±	0.138488	1.82333	±	0.250324	2.50567	±	0.289973	2.33367
D-Cellobiose	1.57733	±	0.561475	1.75	±	0.840414	0.886667	±	0.241372	1.57733	±	0.561475	2.22633	±	0.378546	1.35433	±	0.36002	1.11433	±	0.682739	1.338	±	0.700786	0.63	±	0.143983	1.92933	±	0.356786	1.159	±	0.148899	2.74567	±	0.0454569	2.66467	±	0.331966	2.73367	±	0.138363	2.24333	±	0.423067	2.67133	±	0.166692	2.54467
α-D Lactose	1.35633	±	0.111006	1.30433	±	0.84381	0.969	±	0.582758	1.35633	±	0.111006	1.22867	±	0.603217	1.13233	±	0.617247	0.376667	±	0.471523	1.317	±	0.159361	1.04133	±	0.239283	1.74833	±	0.271765	0.758333	±	0.212801	2.552	±	0.0884534	2.359	±	0.0485077	2.221	±	0.111503	1.498	±	0.498007	2.16867	±	0.240452	2.32233
β-Methyl-Dglucoside	1.078	±	0.430429	0.882333	±	0.319545	1.11767	±	1.02047	1.078	±	0.430429	1.35267	±	0.378763	0.552	±	0.121211	0.690667	±	0.490041	0.418333	±	0.114199	1.03567	±	0.366074	1.86367	±	0.118006	0.941	±	0.0756241	2.79467	±	0.0422532	2.90433	±	0.0725006	2.79	±	0.0108167	2.25433	±	0.488989	2.74333	±	0.0396274	2.85833
D-Xylose	0.863	±	0.436934	0.864333	±	0.302217	1.292	±	0.811017	0.863	±	0.436934	1.45967	±	0.183222	1.03333	±	0.486161	0.891333	±	0.807719	1.447	±	1.69918	0.844	±	0.64115	1.704	±	0.836658	0.483	±	0.194106	2.89933	±	0.181583	2.69233	±	0.0550121	2.69533	±	0.161203	1.577	±	0.208847	3.101	±	0.159615	2.515
i-Erythrital	0.728	±	0.110937	0.651	±	0.381882	0.55	±	0.118731	0.728	±	0.110937	1.06	±	0.273297	0.644667	±	0.092738	0.242333	±	0.235296	0.634667	±	0.150154	0.496667	±	0.168358	0.740667	±	0.326344	0.584	±	0.275806	1.36967	±	0.16914	1.468	±	0.0658255	2.08433	±	0.566463	0.949	±	0.226541	1.49067	±	0.210723	1.391
D-Mannitol	2.872	±	0.327217	2.92267	±	1.83526	2.69	±	0.097811	2.872	±	0.327217	2.338	±	0.713841	2.856	±	0.138791	1.53033	±	1.08623	2.32633	±	1.10606	1.97067	±	0.584589	2.147	±	0.283429	1.50467	±	0.293006	2.735	±	0.309884	2.97333	±	0.0557165	3.08933	±	0.0961735	2.69567	±	0.489349	3.027	±	0.108678	2.83767
N-Acetyl-D-Glucosamine	1.69533	±	0.298027	1.50733	±	0.855108	1.73467	±	0.257506	1.69533	±	0.298027	1.43267	±	0.00305505	1.55367	±	0.195413	0.676667	±	0.289726	0.725333	±	0.236984	1.98367	±	0.698857	1.55	±	0.274394	0.875	±	0.0694766	2.83333	±	0.231364	2.87433	±	0.123622	2.788	±	0.0343948	1.865	±	0.101946	2.53733	±	0.149881	2.47967
D-Glucosaminic Acid	1.65233	±	0.354218	1.765	±	0.997574	1.38733	±	1.13787	1.65233	±	0.354218	1.28133	±	0.261653	1.65767	±	0.200988	1.00433	±	0.831674	0.645333	±	0.935887	0.293333	±	0.0263122	0.450667	±	0.0840496	0.314667	±	0.21485	2.49333	±	0.0348186	2.15767	±	0.159478	2.11533	±	0.201753	0.46	±	0.145351	2.22167	±	0.126571	2.15967
Glucose-1-Phosphate	0.895	±	0.0350286	0.983667	±	0.670788	0.613667	±	0.414859	0.895	±	0.0350286	1.52167	±	0.156513	0.526	±	0.102132	0.104667	±	0.00750555	0.831667	±	0.333788	1.174	±	0.777504	1.45233	±	0.378212	0.810667	±	0.301532	1.792	±	0.266445	1.88767	±	0.226948	2.09333	±	0.141599	1.52933	±	0.428115	1.97733	±	0.0527004	1.65833
D,L-α-Glycerol Phosphate	0.357667	±	0.146029	0.139667	±	0.00449852	0.237	±	0.0347707	0.357667	±	0.146029	0.598	±	0.006245	0.509333	±	0.0220303	0.201	±	0.0469361	0.238667	±	0.0181475	0.309333	±	0.112349	0.72	±	0.135532	0.257	±	0.108254	0.933333	±	0.151064	1.002	±	0.192922	1.003	±	0.0658255	0.337333	±	0.0700024	0.873333	±	0.0844531	0.818
D-galactonic Acid γ-Lactone	1.51233	±	0.169589	1.13067	±	0.679585	0.958667	±	0.704787	1.51233	±	0.169589	1.877	±	0.101425	1.51133	±	0.60909	1.10867	±	0.315636	1.10833	±	0.0644386	0.647667	±	0.526217	0.669333	±	0.031628	0.610333	±	0.338216	2.925	±	0.0668356	2.847	±	0.0858604	2.447	±	0.219041	1.303	±	0.97865	2.78233	±	0.0266521	2.30867
D-Galacturonic Acid	1.67367	±	0.831381	1.94033	±	0.784148	1.77567	±	0.932734	1.67367	±	0.831381	1.204	±	0.439969	2.11367	±	0.738151	1.70233	±	0.888784	1.47367	±	0.880787	0.842	±	0.984619	0.949	±	0.0901166	0.864	±	0.960517	2.78767	±	0.0640651	2.872	±	0.371905	2.66633	±	0.122087	2.284	±	0.258025	2.48267	±	0.0820508	2.375
2-Hydroxy Benzoic Acid	0.16	±	0.030315	0.0993333	±	0.0488033	0.118	±	0.007	0.16	±	0.030315	0.450667	±	0.11692	0.163333	±	0.00251661	0.191667	±	0.147582	0.0953333	±	0.0111505	0.198667	±	0.0393234	0.317	±	0.0512152	0.163667	±	0.0070946	0.411333	±	0.051984	0.798667	±	0.728919	2.25067	±	0.189769	0.323667	±	0.0466083	0.507667	±	0.207206	1.05067
4-Hydroxy Benzoic Acid	2.20933	±	0.351206	1.77167	±	1.00442	0.829	±	0.945973	2.20933	±	0.351206	2.19867	±	0.0177858	2.15867	±	0.138637	2.092	±	0.0630952	1.42367	±	0.573363	0.357	±	0.183273	1.836	±	0.425285	0.922667	±	0.765117	1.678	±	0.539401	2.747	±	0.102059	2.86467	±	0.201832	1.421	±	0.324421	2.47567	±	0.218647	2.50467
γ-Hydroxybutyric Acid	1.78067	±	0.854656	0.720667	±	0.094745	0.314333	±	0.202219	1.78067	±	0.854656	1.26967	±	1.04274	1.115	±	0.57863	0.112	±	0.0052915	0.209	±	0.13116	0.409667	±	0.136207	0.929333	±	0.383366	0.275333	±	0.0681493	1.011	±	0.476759	1.90467	±	0.18613	1.78867	±	0.11514	0.949667	±	0.429735	2.29033	±	0.223737	2.04767
itaconic Acid	0.693	±	0.193008	0.72	±	0.37264	0.396	±	0.177798	0.693	±	0.193008	1.172	±	1.377	0.246667	±	0.112731	0.119667	±	0.0215019	0.306	±	0.296936	0.445	±	0.417014	0.852667	±	0.940261	1.19167	±	1.13991	1.274	±	0.676158	2.11467	±	0.310358	2.268	±	0.187385	1.31033	±	0.18816	2.397	±	0.0727461	1.97867
a-Ketobutyric Acid	0.188	±	0.0684178	0.497	±	0.303053	0.126	±	0.01253	0.188	±	0.0684178	0.722	±	0.122315	0.336667	±	0.16641	0.207667	±	0.177399	0.284667	±	0.198031	0.420333	±	0.0745408	0.796333	±	0.134552	0.519333	±	0.175967	0.634333	±	0.0832666	0.965	±	0.109995	1.68333	±	0.210505	0.995667	±	0.235789	0.77	±	0.0684324	2.17067
D-Malic Acid	0.550667	±	0.1325	0.781	±	0.458559	0.912333	±	0.846812	0.550667	±	0.1325	1.74933	±	1.06158	0.739667	±	0.296352	0.427333	±	0.147707	0.674333	±	0.81126	0.604667	±	0.217571	0.784	±	0.37793	0.794667	±	0.090013	1.55933	±	0.947568	2.025	±	0.36673	1.99	±	0.107392	1.401	±	0.223917	2.16967	±	0.182237	2.12867
L-Arginine	2.325	±	0.171747	2.32033	±	1.51928	2.46533	±	0.143472	2.325	±	0.171747	2.487	±	0.350667	2.79033	±	0.341444	2.29133	±	0.16115	2.57967	±	0.0172143	1.41667	±	1.11583	1.975	±	0.66688	2.38333	±	0.512817	2.858	±	0.12579	2.95133	±	0.0527668	2.92033	±	0.0427239	2.246	±	0.609889	2.86067	±	0.197161	2.74967
L-Asparagine	2.95333	±	0.0299555	2.994	±	2.0959	2.61667	±	0.231882	2.95333	±	0.0299555	2.786	±	0.173554	2.99233	±	0.124179	2.84433	±	0.144237	2.773	±	0.294586	0.761667	±	0.553473	2.55467	±	0.109738	2.67533	±	0.168826	2.648	±	0.263661	2.865	±	0.0272213	2.79267	±	0.122659	2.541	±	0.155058	2.84367	±	0.178646	2.653
L-Phenylalanine	1.67933	±	0.292372	1.27	±	0.691287	1.22467	±	0.558212	1.67933	±	0.292372	1.24133	±	0.0863964	1.23833	±	0.55672	0.374	±	0.202724	1.324	±	0.729052	0.474333	±	0.123699	1.65033	±	0.341469	1.58933	±	0.85619	2.76733	±	0.204101	2.94367	±	0.0859787	2.96033	±	0.0672632	2.912	±	0.251388	2.67	±	0.190505	2.71933
L-Serine	2.362	±	0.0776595	2.39567	±	1.63908	1.62367	±	0.920266	2.362	±	0.0776595	2.3	±	0.0900888	1.802	±	0.358941	2.02	±	0.238661	0.825667	±	0.966582	0.541	±	0.239508	1.76367	±	0.86034	1.03567	±	0.719501	2.72833	±	0.0831284	2.837	±	0.100195	2.94033	±	0.147056	1.16833	±	0.240069	2.78467	±	0.186049	2.551
L-Threonine	0.345	±	0.0347707	0.560333	±	0.371629	0.222	±	0.0469361	0.345	±	0.0347707	0.860667	±	0.171885	0.517667	±	0.172164	0.327	±	0.35277	0.143	±	0.0205183	0.692667	±	0.276905	0.845	±	0.153245	0.455	±	0.174697	1.748	±	0.216583	1.65733	±	0.177523	1.90933	±	0.0554737	0.743667	±	0.149564	1.87367	±	0.157976	1.82767
Glycyl-L-Glutamic Acid	0.251667	±	0.0185562	0.391667	±	0.263829	0.207333	±	0.0529182	0.251667	±	0.0185562	1.03133	±	0.105006	0.551667	±	0.068413	0.124	±	0.0433474	0.430667	±	0.242723	0.365667	±	0.0568624	1.029	±	0.168199	0.556333	±	0.275181	1.287	±	0.0940266	1.208	±	0.148192	1.38567	±	0.0470142	0.915667	±	0.0875576	1.45367	±	0.0876945	1.17633
Phenylethyl-amine	0.179	±	0.008544	0.140667	±	0.0934248	2.097	±	0.11985	0.179	±	0.008544	2.583	±	0.0530283	2.46067	±	0.0705006	2.42867	±	0.0401539	1.829	±	0.254384	0.920667	±	1.23098	0.252333	±	0.0145717	0.183333	±	0.0155027	1.66867	±	1.19996	2.61133	±	0.363266	2.37333	±	0.0120968	1.11567	±	0.142304	2.49833	±	0.108694	2.394
Putrescine	1.29167	±	0.176704	0.879667	±	0.49707	1.32333	±	0.339544	1.29167	±	0.176704	1.25867	±	0.0547936	1.266	±	0.0410731	1.231	±	0.0903383	1.536	±	0.295061	0.197	±	0.023516	1.811	±	0.252668	1.275	±	0.952515	1.96567	±	0.19334	1.66067	±	0.0605007	1.96933	±	0.198457	1.36467	±	1.04238	1.49733	±	0.0973259	1.683
[truncated: 23 more columns]
