# Supplementary material for: Dynamics of Bacterial Community Structure in the Rhizosphere and Root Nodule of Soybean: Impacts of Growth Stages and Varieties
Source: Int J Mol Sci. 2021 May 25;22(11):5577. doi: 10.3390/ijms22115577 (PMC8197538; doi:10.3390/ijms22115577)
Supplement: Supplementary file 1 [file ijms-22-05577-s001.zip › Table S2.xls]

## Sheet: 미생물 최종 OTU(%)
Table S2. Overall OTUs identified from the sequencing reads.						Bulk soil												Rhizosphere soil
						BS(0621)												V2(0713)												R1(0804)												R3(0817)
						KA			PS			PW			TK			KA			PS			PW				TK			KA			PS			PW			TK		KA			PS			PW
Group	Phylum	Class	Order	Family	Genus	Mean	±	STDEV	Mean	±	STDEV	Mean	±	STDEV	Mean	±	STDEV	Mean	±	STDEV	Mean	±	STDEV	Mean	±	STDEV	Mean	±	STDEV	Mean	±	STDEV	Mean	±	STDEV	Mean	±	STDEV	Mean	±	STDEV	Mean	±	STDEV	Mean	±	STDEV	Mean	±
OTU1	Proteobacteria	Alphaproteobacteria	Rhizobiales	Bradyrhizobiaceae	Bradyrhizobium	0.265847	±	0.0360043	0.302892	±	0.0593173	0.344294	±	0.118815	0.379159	±	0.0653723	0.337757	±	0.00377427	0.422741	±	0.10568	0.516441	±	0.335953	0.346473	±	0.0284951	0.49465	±	0.107881	0.549127	±	0.413916	0.435815	±	0.176908	0.869452	±	0.449075	8.44174	±	8.68292	4.37994	±	6.7829	0.47286	±
OTU2	Actinobacteria	Actinobacteria	Actinomycetales	Micrococcaceae	Arthrobacter	7.58972	±	0.511536	7.91876	±	0.835292	6.59171	±	1.72826	6.75078	±	1.10914	5.9053	±	2.04574	6.00553	±	0.827427	7.44155	±	3.27088	6.56556	±	0.614998	4.9988	±	1.82341	5.51524	±	4.31664	2.48197	±	0.598659	3.70443	±	1.69335	3.65213	±	1.46332	5.74622	±	1.29279	4.93779	±
OTU7	Proteobacteria	Alphaproteobacteria	Sphingomonadales	Sphingomonadaceae	Sphingomonas	4.62836	±	0.1633	5.0925	±	0.302625	4.72424	±	0.431672	4.74603	±	0.304104	3.90926	±	0.553468	3.57369	±	0.257565	3.65649	±	0.570852	3.79595	±	0.151958	2.82626	±	0.241907	2.34904	±	0.433647	2.79576	±	0.589886	2.95483	±	0.599468	3.16402	±	0.376955	3.31438	±	0.563758	3.46691	±
OTU14695	Proteobacteria	Alphaproteobacteria	Rhizobiales	Bradyrhizobiaceae	Bradyrhizobiaceae_unclassified	0	±	0	0	±	0	0.00217908	±	0.00377427	0.00435815	±	0.00377427	0	±	0	0.0130745	±	0.0130745	0.00871631	±	0.00754854	0.0152535	±	0.0136083	0.0174326	±	0.0188714	0.00871631	±	0.00754854	0.00217908	±	0.00377427	0.0653723	±	0.102115	0.586172	±	0.925528	0.0239698	±	0.022958	0	±
OTU6	Actinobacteria	Actinobacteria	Actinomycetales	Nocardioidaceae	Aeromicrobium	0.137282	±	0.0345918	0.100238	±	0.043527	0.128566	±	0.0371723	0.124207	±	0.0581042	0.409666	±	0.146226	0.318145	±	0.088996	0.305071	±	0.130799	0.477218	±	0.184438	0.926108	±	0.385992	2.19651	±	1.94068	3.58022	±	2.55522	7.01445	±	3.64827	6.05565	±	1.98835	4.87024	±	2.05455	4.4475	±
OTU4	Bacteroidetes	Flavobacteriia	Flavobacteriales	Flavobacteriaceae	Flavobacterium	0.0305071	±	0.0188714	0.00217908	±	0.00377427	0.00435815	±	0.00754854	0.00217908	±	0.00377427	0.00217908	±	0.00377427	0.0152535	±	0.00998578	0.0130745	±	0.0172959	0.00871631	±	0.0150971	0.00871631	±	0.0150971	0.00217908	±	0.00377427	0.0174326	±	0.0164517	0.00653723	±	0.00653723	0.00871631	±	0.00998578	0.00217908	±	0.00377427	0	±
OTU5	Firmicutes	Bacilli	Bacillales	Bacillaceae_1	Bacillus	2.21394	±	0.799611	2.44274	±	1.02635	1.73454	±	0.249645	1.82171	±	0.415221	2.91125	±	0.323598	3.40372	±	0.66095	2.99841	±	0.209327	3.3013	±	0.996429	2.64104	±	0.674096	2.02872	±	0.313128	2.04833	±	0.736718	1.94156	±	0.597111	1.94156	±	1.43853	2.3534	±	0.777023	3.6761	±
OTU3	Actinobacteria	Actinobacteria	Acidimicrobiales	Iamiaceae	Iamiaceae_unclassified	2.10063	±	0.554176	2.4166	±	1.39469	1.93066	±	0.729197	3.4364	±	2.23346	2.15075	±	1.40334	2.86113	±	1.53196	2.06359	±	0.464205	1.82171	±	0.545078	2.10281	±	0.615553	1.68878	±	0.228554	2.66937	±	0.971309	1.6561	±	0.857881	2.97226	±	1.36414	1.70404	±	0.516496	1.37064	±
OTU14	Actinobacteria	Actinobacteria	Actinomycetales	Intrasporangiaceae	Intrasporangiaceae_unclassified	2.67155	±	0.26557	3.12262	±	0.296298	2.90907	±	0.359904	2.22266	±	0.523101	1.74108	±	0.583879	1.6147	±	0.343873	1.64738	±	0.300072	1.70622	±	0.181283	1.17016	±	0.232692	0.954436	±	0.131234	0.89778	±	0.332393	0.87381	±	0.125122	1.13748	±	0.216026	1.2813	±	0.323114	1.12005	±
OTU15	Acidobacteria	Acidobacteria_Gp16	Gp16	Gp16_unclassified	Gp16_unclassified	1.50574	±	0.176667	1.45344	±	0.0272167	1.52535	±	0.313878	1.56022	±	0.3484	1.35321	±	0.301564	1.25733	±	0.17176	1.17888	±	0.450279	1.22464	±	0.344701	1.19195	±	0.26869	1.23989	±	0.219395	1.15055	±	0.248415	1.33359	±	0.415718	0.982764	±	0.275211	0.963152	±	0.205931	0.974047	±
OTU8	Actinobacteria	Actinobacteria	Actinomycetales	Nocardioidaceae	Marmoricola	1.54932	±	0.464833	1.69314	±	0.257205	1.73019	±	0.39475	1.39025	±	0.434238	1.32052	±	0.300926	1.06775	±	0.135926	1.32924	±	0.288034	1.4687	±	0.412278	1.10479	±	0.111517	0.61232	±	0.0853186	0.729991	±	0.212669	0.706021	±	0.261734	0.68423	±	0.0603883	0.666797	±	0.111133	0.649365	±
OTU11	Acidobacteria	Acidobacteria_Gp16	Gp16	Gp16_unclassified	Gp16_unclassified	0.8019	±	0.103844	0.845482	±	0.188827	0.782288	±	0.075768	0.930466	±	0.0555985	1.33795	±	0.509918	0.96751	±	0.200108	1.15491	±	0.387539	1.4578	±	0.48052	1.41422	±	0.0817372	1.00673	±	0.347212	1.24643	±	0.110232	1.44691	±	0.410355	0.743065	±	0.112724	0.806258	±	0.234734	0.910854	±
OTU18	Actinobacteria	Actinobacteria	Gaiellales	Gaiellaceae	Gaiella	1.05685	±	0.0621323	0.989301	±	0.186893	1.15491	±	0.094583	0.998017	±	0.170637	1.11351	±	0.209327	0.960973	±	0.0736708	0.971868	±	0.2783	1.0939	±	0.1471	0.854198	±	0.092758	0.773572	±	0.170136	0.808437	±	0.153358	0.945719	±	0.176182	0.653723	±	0.0949587	0.701663	±	0.0555985	0.607962	±
OTU12	Proteobacteria	Alphaproteobacteria	Rhizobiales	Rhizobiaceae	Rhizobium	0.274564	±	0.312217	0.145998	±	0.0948086	0.0893421	±	0.045916	0.150356	±	0.08165	0.361727	±	0.1471	0.257131	±	0.0763299	0.477218	±	0.226833	0.250594	±	0.0723046	0.357369	±	0.25101	0.263668	±	0.194402	0.193938	±	0.0425339	0.531695	±	0.450136	0.913033	±	0.276914	0.745244	±	0.192931	0.712558	±
OTU32	Gemmatimonadetes	Gemmatimonadetes	Gemmatimonadales	Gemmatimonadaceae	Gemmatimonas	0.747423	±	0.210853	0.788826	±	0.134186	0.952256	±	0.201738	0.880347	±	0.298167	1.06993	±	0.179784	0.987122	±	0.0962994	0.860735	±	0.330394	1.08736	±	0.108276	0.836765	±	0.275496	0.828049	±	0.0621323	0.7082	±	0.237629	0.810616	±	0.206415	0.658081	±	0.225732	0.54259	±	0.156894	0.701663	±
OTU22	Proteobacteria	Alphaproteobacteria	Sphingomonadales	Sphingomonadaceae	Sphingomonas	0.799721	±	0.0394045	0.649365	±	0.0654812	0.655902	±	0.170136	0.804079	±	0.0299573	0.723453	±	0.184013	0.764856	±	0.0854854	0.649365	±	0.241553	0.814975	±	0.163474	0.610141	±	0.0308937	0.531695	±	0.120777	0.594888	±	0.188449	0.570918	±	0.165939	0.727812	±	0.142075	0.878168	±	0.154192	0.75396	±
OTU16	Actinobacteria	Actinobacteria	Actinomycetales	Streptomycetaceae	Streptomyces	1.44691	±	0.437181	1.20503	±	0.256317	1.03506	±	0.304689	1.03506	±	0.209735	0.893421	±	0.279602	0.703842	±	0.206346	0.758319	±	0.305716	0.7082	±	0.20195	0.562202	±	0.221977	0.481576	±	0.141018	0.47286	±	0.134026	0.470681	±	0.144264	0.433636	±	0.0952583	0.499009	±	0.0164517	0.431457	±
OTU9	Acidobacteria	Acidobacteria_Gp4	Blastocatella	Blastocatella_unclassified	Blastocatella_unclassified	0.902138	±	0.0770728	0.982764	±	0.370802	1.05031	±	0.170637	0.762677	±	0.0827762	0.828049	±	0.0790798	0.808437	±	0.0992138	0.719095	±	0.174067	0.856377	±	0.126086	0.577455	±	0.0692864	0.607962	±	0.0736708	0.601425	±	0.14456	0.557844	±	0.0934466	0.634111	±	0.122126	0.540411	±	0.0593173	0.536053	±
OTU48	Actinobacteria	Actinobacteria	Actinomycetales	Streptomycetaceae	Streptomyces	0.398771	±	0.21907	0.381338	±	0.291206	0.152535	±	0.00998578	0.222266	±	0.133494	0.664618	±	0.177872	0.645007	±	0.50478	1.50792	±	1.21547	0.982764	±	0.498732	1.68661	±	1.66535	0.222266	±	0.134133	1.47959	±	2.16083	0.25931	±	0.0929881	0.533874	±	0.613397	1.43601	±	2.17045	3.93977	±
OTU17	Bacteria_unclassified	Bacteria_unclassified	Bacteria_unclassified	Bacteria_unclassified	Bacteria_unclassified	0.479397	±	0.0322474	0.416204	±	0.0555985	0.531695	±	0.164387	0.531695	±	0.145787	0.621037	±	0.111517	0.625395	±	0.109844	0.570918	±	0.176546	0.651544	±	0.121306	0.695125	±	0.265892	0.664618	±	0.110619	0.616679	±	0.102602	0.716916	±	0.14768	0.418383	±	0.141422	0.51862	±	0.105882	0.461964	±
OTU13	Actinobacteria	Actinobacteria	Actinomycetales	Nocardioidaceae	Nocardioides	0.884705	±	0.269325	0.923928	±	0.0667737	0.793184	±	0.0528398	0.723453	±	0.102185	0.686409	±	0.0284951	0.695125	±	0.134345	0.710379	±	0.168114	0.793184	±	0.156939	0.520799	±	0.0322474	0.363906	±	0.183315	0.414025	±	0.041517	0.407487	±	0.100072	0.366085	±	0.0226456	0.385697	±	0.172959	0.536053	±
OTU24	Actinobacteria	Actinobacteria	Solirubrobacterales	Solirubrobacterales_unclassified	Solirubrobacterales_unclassified	0.028328	±	0.0210143	0.0305071	±	0.0264199	0.028328	±	0.0164517	0.0239698	±	0.00754854	0.028328	±	0.0335465	0.0435815	±	0.043527	0.0588351	±	0.0736708	0.0828049	±	0.029478	0.453248	±	0.104255	0.745244	±	0.410182	1.05903	±	0.265302	0.860735	±	0.62465	0.908675	±	0.221013	0.736528	±	0.212971	0.706021	±
OTU50	Proteobacteria	Gammaproteobacteria	Enterobacteriales	Enterobacteriaceae	Enterobacter	0	±	0	0	±	0	0.00217908	±	0.00377427	0	±	0	0.0196117	±	0.0339684	0	±	0	0	±	0	0	±	0	0.00435815	±	0.00377427	0.0239698	±	0.0360043	0.00653723	±	1.0623e-18	0.0174326	±	0.0301942	0.139461	±	0.230323	0.0784468	±	0.124722	0	±
OTU44	Proteobacteria	Betaproteobacteria	Burkholderiales	Burkholderiales_incertae_sedis	Burkholderiales_incertae_sedis_unclassified	0.387876	±	0.0934466	0.348652	±	0.0272167	0.490292	±	0.0727955	0.509904	±	0.0653723	0.54259	±	0.128602	0.414025	±	0.126142	0.47286	±	0.225542	0.546948	±	0.094583	0.568739	±	0.08165	0.546948	±	0.146226	0.49465	±	0.180732	0.485934	±	0.112534	0.573097	±	0.0425339	0.496829	±	0.068874	0.407487	±
OTU66	Proteobacteria	Betaproteobacteria	Betaproteobacteria_unclassified	Betaproteobacteria_unclassified	Betaproteobacteria_unclassified	0.372622	±	0.0363978	0.368264	±	0.112724	0.512083	±	0.0734772	0.379159	±	0.089872	0.440173	±	0.0952583	0.457606	±	0.0623612	0.387876	±	0.0371723	0.379159	±	0.068874	0.481576	±	0.0723046	0.658081	±	0.117731	0.464143	±	0.0235703	0.553485	±	0.127825	0.492471	±	0.111197	0.422741	±	0.0494991	0.440173	±
OTU10	Actinobacteria	Actinobacteria	Actinobacteria_unclassified	Actinobacteria_unclassified	Actinobacteria_unclassified	0.481576	±	0.0752018	0.409666	±	0.0720085	0.483755	±	0.0727955	0.505546	±	0.0952583	0.335578	±	0.0490655	0.481576	±	0.180021	0.414025	±	0.0555985	0.468501	±	0.00998578	0.470681	±	0.108801	0.601425	±	0.0113228	0.499009	±	0.0481867	0.61232	±	0.235461	0.409666	±	0.206139	0.429278	±	0.140867	0.522978	±
OTU47	Proteobacteria	Alphaproteobacteria	Rhizobiales	Rhizobiales_unclassified	Rhizobiales_unclassified	0.507725	±	0.111197	0.429278	±	0.0822583	0.505546	±	0.0686668	0.555665	±	0.0172959	0.442353	±	0.174476	0.464143	±	0.141573	0.326861	±	0.0623612	0.437994	±	0.0908181	0.427099	±	0.0843108	0.433636	±	0.0670929	0.385697	±	0.0226456	0.509904	±	0.163823	0.315966	±	0.0957059	0.339936	±	0.0581042	0.429278	±
OTU33	Chloroflexi	Chloroflexi_unclassified	Chloroflexi_unclassified	Chloroflexi_unclassified	Chloroflexi_unclassified	0.570918	±	0.144757	0.562202	±	0.0566141	0.564381	±	0.045916	0.610141	±	0.0843108	0.431457	±	0.121071	0.501188	±	0.0774416	0.457606	±	0.113417	0.540411	±	0.101555	0.414025	±	0.0981311	0.355189	±	0.0754854	0.411845	±	0.0727955	0.483755	±	0.0196117	0.263668	±	0.0399431	0.309429	±	0.151536	0.335578	±
OTU23	Candidatus_Saccharibacteria	Candidatus_Saccharibacteria_unclassified	Candidatus_Saccharibacteria_unclassified	Candidatus_Saccharibacteria_unclassified	Candidatus_Saccharibacteria_unclassified	0.00217908	±	0.00377427	0	±	0	0	±	0	0	±	0	0	±	0	0.0435815	±	0.0532426	0.0522978	±	0.0599147	0.0217908	±	0.0164517	0.318145	±	0.0766093	0.516441	±	0.447836	1.35539	±	1.24122	0.411845	±	0.126255	0.414025	±	0.126142	0.481576	±	0.315981	1.20503	±
OTU120	Firmicutes	Bacilli	Bacillales	Bacillaceae_1	Bacillus	0.446711	±	0.0617875	0.42492	±	0.0736708	0.444532	±	0.068874	0.385697	±	0.0770728	0.483755	±	0.0803308	0.501188	±	0.0607411	0.398771	±	0.13697	0.455427	±	0.0934466	0.379159	±	0.125235	0.355189	±	0.0383047	0.322503	±	0.181675	0.363906	±	0.105882	0.261489	±	0.0558541	0.363906	±	0.0264199	0.33122	±
OTU49	Firmicutes	Clostridia	Clostridiales	Clostridiaceae_1	Clostridium_sensu_stricto	0.551306	±	0.1471	0.505546	±	0.163474	0.461964	±	0.0963733	0.481576	±	0.0555985	0.422741	±	0.0499289	0.501188	±	0.19018	0.396592	±	0.160173	0.355189	±	0.104664	0.318145	±	0.044498	0.403129	±	0.0425339	0.387876	±	0.0952583	0.250594	±	0.0692864	0.237519	±	0.094583	0.326861	±	0.160529	0.285459	±
OTU1219	Proteobacteria	Alphaproteobacteria	Rhizobiales	Rhodobiaceae	Rhodobiaceae_unclassified	0.418383	±	6.7987e-17	0.407487	±	0.0607411	0.418383	±	0.0363978	0.433636	±	0.0420285	0.403129	±	0.0832909	0.383517	±	0.0371723	0.298533	±	0.0705092	0.335578	±	0.146954	0.457606	±	0.137282	0.346473	±	0.182223	0.276743	±	0.114417	0.363906	±	0.0658067	0.272385	±	0.0952583	0.313787	±	0.092219	0.276743	±
OTU37	Actinobacteria	Actinobacteria	Acidimicrobiales	Acidimicrobiaceae	Ilumatobacter	0.302892	±	0.0301942	0.246236	±	0.0790798	0.296354	±	0.0136083	0.302892	±	0.117002	0.387876	±	0.091832	0.305071	±	0.0472915	0.289817	±	0.0264199	0.344294	±	0.0528398	0.302892	±	0.0717112	0.272385	±	0.104868	0.263668	±	0.0399431	0.309429	±	0.0617875	0.366085	±	0.0908181	0.296354	±	0.0507776	0.272385	±
OTU36	Proteobacteria	Alphaproteobacteria	Sphingomonadales	Sphingomonadaceae	Sphingomonadaceae_unclassified	0.320324	±	0.084984	0.254952	±	0.0691835	0.213549	±	0.0720085	0.217908	±	0.0593173	0.178684	±	0.0199716	0.11767	±	0.0428675	0.102417	±	0.0264199	0.108954	±	0.0272167	0.200475	±	0.117731	0.159073	±	0.104255	0.14164	±	0.058956	0.167789	±	0.0571151	0.529516	±	0.089872	0.451069	±	0.224846	0.261489	±
OTU19	Actinobacteria	Actinobacteria	Actinomycetales	Pseudonocardiaceae	Pseudonocardia	0.00435815	±	0.00754854	0.00653723	±	0.00653723	0.00653723	±	0.00653723	0.00435815	±	0.00377427	0.00653723	±	0.00653723	0.0152535	±	0.0150971	0.0130745	±	0.0130745	0.00871631	±	0.00377427	0.102417	±	0.0199716	0.385697	±	0.300215	0.553485	±	0.10867	0.453248	±	0.39334	0.49465	±	0.15816	0.549127	±	0.122126	0.531695	±
OTU40	Proteobacteria	Deltaproteobacteria	Myxococcales	Myxococcaceae	Myxococcaceae_unclassified	0.329041	±	0.135926	0.196117	±	0.0363978	0.285459	±	0.0371723	0.254952	±	0.0326861	0.383517	±	0.166197	0.396592	±	0.0136083	0.322503	±	0.112724	0.433636	±	0.106485	0.355189	±	0.0699005	0.270205	±	0.0494991	0.265847	±	0.083034	0.246236	±	0.110232	0.180863	±	0.0481867	0.342115	±	0.149977	0.348652	±
OTU38	Actinobacteria	Actinobacteria	Actinomycetales	Glycomycetaceae	Glycomyces	1.17016	±	0.232325	1.6561	±	1.19846	1.12876	±	0.204891	1.07428	±	0.239867	0.241877	±	0.068874	0.137282	±	0.068874	0.239698	±	0.0827762	0.246236	±	0.041517	0.0610141	±	0.0301942	0.111133	±	0.0707109	0.126386	±	0.0832909	0.0980584	±	0.0299573	0.0697304	±	0.0425339	0.0544769	±	0.0247496	0.0653723	±
OTU26	Acidobacteria	Acidobacteria_Gp16	Gp16	Gp16_unclassified	Gp16_unclassified	0.333399	±	0.0518877	0.248415	±	0.0599147	0.337757	±	0.00998578	0.42492	±	0.0643842	0.294175	±	0.145591	0.278922	±	0.134026	0.252773	±	0.183315	0.374801	±	0.117185	0.361727	±	0.200463	0.361727	±	0.0981311	0.37698	±	0.184477	0.533874	±	0.203111	0.187401	±	0.103844	0.237519	±	0.106284	0.281101	±
OTU60	Bacteroidetes	Cytophagia	Cytophagales	Ohtaekwangia	Ohtaekwangia_unclassified	0.246236	±	0.115532	0.274564	±	0.0457606	0.263668	±	0.0394045	0.23534	±	0.0663456	0.403129	±	0.0621323	0.390055	±	0.0853186	0.416204	±	0.160173	0.315966	±	0.0812126	0.329041	±	0.0548245	0.387876	±	0.129815	0.313787	±	0.0915212	0.422741	±	0.149692	0.348652	±	0.0507776	0.287638	±	0.0834618	0.28328	±
OTU89	Proteobacteria	Alphaproteobacteria	Rhizobiales	Hyphomicrobiaceae	Devosia	0.252773	±	0.0399431	0.18958	±	0.0284951	0.254952	±	0.0326861	0.244057	±	0.091599	0.257131	±	0.0136083	0.276743	±	0.044498	0.305071	±	0.0399431	0.244057	±	0.0524339	0.311608	±	0.111389	0.217908	±	0.0199716	0.204833	±	0.0272167	0.302892	±	0.0766093	0.359548	±	0.114542	0.300713	±	0.0967422	0.396592	±
OTU34	Actinobacteria	Actinobacteria	Gaiellales	Gaiellaceae	Gaiella	0.42492	±	0.0226456	0.374801	±	0.109844	0.318145	±	0.0790798	0.420562	±	0.0863145	0.348652	±	0.00998578	0.300713	±	0.0727955	0.357369	±	0.0617875	0.427099	±	0.0481867	0.252773	±	0.0210143	0.209191	±	0.0736708	0.261489	±	0.0299573	0.315966	±	0.143422	0.265847	±	0.122707	0.213549	±	0.00754854	0.244057	±
OTU31	Proteobacteria	Alphaproteobacteria	Rhizobiales	Hyphomicrobiaceae	Hyphomicrobium	0.396592	±	0.0571151	0.257131	±	0.0360043	0.285459	±	0.092758	0.363906	±	0.091599	0.329041	±	0.0798863	0.313787	±	0.114914	0.270205	±	0.0371723	0.320324	±	0.115655	0.291996	±	0.0544333	0.28328	±	0.0779915	0.278922	±	0.0699005	0.268026	±	0.0172959	0.196117	±	0.0727955	0.276743	±	0.0585924	0.350831	±
OTU62	Bacteria_unclassified	Bacteria_unclassified	Bacteria_unclassified	Bacteria_unclassified	Bacteria_unclassified	0.322503	±	0.0371723	0.254952	±	0.0518877	0.276743	±	0.0548245	0.278922	±	0.0272167	0.326861	±	0.0719095	0.298533	±	0.0308937	0.322503	±	0.169506	0.344294	±	0.00754854	0.311608	±	0.17001	0.326861	±	0.0196117	0.28328	±	0.0798863	0.379159	±	0.0989262	0.276743	±	0.044498	0.285459	±	0.0743445	0.285459	±
OTU21	Actinobacteria	Actinobacteria	Actinomycetales	Microbacteriaceae	Agromyces	0.42492	±	0.0172959	0.379159	±	0.0742487	0.333399	±	0.0819113	0.326861	±	0.0428675	0.326861	±	0.0452913	0.265847	±	0.0641626	0.383517	±	0.190517	0.305071	±	0.0532426	0.261489	±	0.0226456	0.222266	±	0.0299573	0.176505	±	0.0196117	0.254952	±	0.0719095	0.268026	±	0.115655	0.287638	±	0.0770728	0.215729	±
OTU110	Actinobacteria	Actinobacteria	Actinomycetales	Mycobacteriaceae	Mycobacterium	0.228803	±	0.0522978	0.224445	±	0.105071	0.16561	±	0.0420285	0.278922	±	0.043527	0.215729	±	0.0736708	0.289817	±	0.0593173	0.313787	±	0.11398	0.265847	±	0.0752018	0.268026	±	0.0299573	0.187401	±	0.0247496	0.213549	±	0.0670929	0.274564	±	0.0581042	0.281101	±	0.0643842	0.289817	±	0.105882	0.361727	±
OTU71	Acidobacteria	Acidobacteria_Gp3	Gp3	Gp3_unclassified	Gp3_unclassified	0.315966	±	0.125122	0.422741	±	0.10568	0.385697	±	0.0113228	0.357369	±	0.0247496	0.361727	±	0.119174	0.383517	±	0.129815	0.390055	±	0.0929881	0.320324	±	0.100639	0.300713	±	0.092219	0.239698	±	0.0785375	0.274564	±	0.0397644	0.246236	±	0.0617875	0.21137	±	0.0394045	0.250594	±	0.110619	0.207012	±
OTU83	Actinobacteria	Actinobacteria	Acidimicrobiales	Iamiaceae	Iamia	0.477218	±	0.0172959	0.479397	±	0.0929881	0.573097	±	0.043527	0.394413	±	0.0779915	0.289817	±	0.087054	0.21137	±	0.0798863	0.187401	±	0.0634931	0.291996	±	0.0322474	0.241877	±	0.118214	0.250594	±	0.0906611	0.241877	±	0.130745	0.285459	±	0.043527	0.228803	±	0.0130745	0.241877	±	0.0339684	0.296354	±
OTU55	Gemmatimonadetes	Gemmatimonadetes	Gemmatimonadales	Gemmatimonadaceae	Gemmatimonas	0.407487	±	0.124437	0.344294	±	0.0981311	0.468501	±	0.043527	0.315966	±	0.0686668	0.342115	±	0.0593173	0.324682	±	0.0360043	0.230982	±	0.0925274	0.309429	±	0.075768	0.302892	±	0.0720085	0.333399	±	0.0926812	0.272385	±	0.111389	0.305071	±	0.0272167	0.183042	±	0.0510574	0.276743	±	0.11423	0.222266	±
OTU75	Proteobacteria	Gammaproteobacteria	Xanthomonadales	Sinobacteraceae	Povalibacter	0.270205	±	0.0399431	0.248415	±	0.0363978	0.30725	±	0.179149	0.233161	±	0.0490655	0.261489	±	0.0235703	0.370443	±	0.0335465	0.300713	±	0.132207	0.270205	±	0.0585924	0.370443	±	0.0901885	0.407487	±	0.117002	0.281101	±	0.0457606	0.348652	±	0.130962	0.268026	±	0.0452913	0.241877	±	0.0339684	0.329041	±
OTU35	Proteobacteria	Gammaproteobacteria	Pseudomonadales	Pseudomonadaceae	Pseudomonas	0.00871631	±	0.00998578	0.028328	±	0.0264199	0.0239698	±	0.0308937	0.0108954	±	0.00754854	0.278922	±	0.432265	0.0980584	±	0.0558541	0.0784468	±	0.0345918	0.0479397	±	0.0383047	0.0239698	±	0.00754854	0.102417	±	0.143571	0.0828049	±	0.0628164	0.143819	±	0.170971	0.562202	±	0.705021	0.291996	±	0.221335	0.0174326	±
OTU68	Nitrospirae	Nitrospira	Nitrospirales	Nitrospiraceae	Nitrospira	0.276743	±	0.0617875	0.28328	±	0.0335465	0.335578	±	0.0863145	0.285459	±	0.0705092	0.33122	±	0.0952583	0.335578	±	0.087054	0.387876	±	0.102602	0.33122	±	0.091832	0.25931	±	0.0692864	0.326861	±	0.0581042	0.348652	±	0.0383047	0.250594	±	0.105071	0.213549	±	0.0383047	0.233161	±	0.0892358	0.329041	±
OTU164	Proteobacteria	Alphaproteobacteria	Rhizobiales	Phyllobacteriaceae	Mesorhizobium	0.222266	±	0.00653723	0.23534	±	0.068874	0.198296	±	0.0667737	0.250594	±	0.041517	0.246236	±	0.0360043	0.233161	±	0.022958	0.25931	±	0.0425339	0.152535	±	0.0308937	0.228803	±	0.0397644	0.215729	±	0.0854854	0.198296	±	0.043527	0.23534	±	0.0864794	0.291996	±	0.0481867	0.289817	±	0.0868082	0.422741	±
OTU744	Proteobacteria	Alphaproteobacteria	Sphingomonadales	Sphingomonadaceae	Novosphingobium	0.148177	±	0.0164517	0.126386	±	0.0863145	0.106775	±	0.0360043	0.122028	±	0.0264199	0.111133	±	0.0130745	0.100238	±	0.00377427	0.130745	±	0.0113228	0.0958794	±	0.043527	0.187401	±	0.0680416	0.14164	±	0.0264199	0.148177	±	0.045916	0.21137	±	0.153914	0.370443	±	0.122707	0.433636	±	0.166966	0.237519	±
OTU20	Candidatus_Saccharibacteria	Candidatus_Saccharibacteria_unclassified	Candidatus_Saccharibacteria_unclassified	Candidatus_Saccharibacteria_unclassified	Candidatus_Saccharibacteria_unclassified	0.0196117	±	0.0130745	0.0305071	±	0.00998578	0.0675514	±	0.029478	0.0435815	±	0.022958	0.263668	±	0.122359	0.230982	±	0.0983486	0.152535	±	0.0329033	0.42492	±	0.246602	0.525157	±	0.0571151	0.871631	±	0.399271	0.662439	±	0.24585	0.326861	±	0.133494	0.276743	±	0.0264199	0.366085	±	0.0908181	0.359548	±
OTU74	Gemmatimonadetes	Gemmatimonadetes	Gemmatimonadales	Gemmatimonadaceae	Gemmatimonas	0.285459	±	0.0667737	0.272385	±	0.0264199	0.385697	±	0.0226456	0.346473	±	0.0284951	0.274564	±	0.0299573	0.322503	±	0.0593173	0.287638	±	0.084984	0.326861	±	0.103775	0.274564	±	0.164992	0.370443	±	0.0686668	0.207012	±	0.0617875	0.322503	±	0.0827762	0.163431	±	0.0510574	0.215729	±	0.0819113	0.193938	±
OTU70	Proteobacteria	Betaproteobacteria	Burkholderiales	Burkholderiales_unclassified	Burkholderiales_unclassified	0.207012	±	0.058956	0.183042	±	0.0226456	0.196117	±	0.0428675	0.172147	±	0.022958	0.198296	±	0.104868	0.204833	±	0.0494991	0.152535	±	0.046379	0.18958	±	0.0599147	0.324682	±	0.0887556	0.318145	±	0.0199716	0.381338	±	0.058956	0.475039	±	0.0210143	0.261489	±	0.092219	0.291996	±	0.0524339	0.370443	±
OTU28	Bacteroidetes	Sphingobacteriia	Sphingobacteriales	Chitinophagaceae	Flavisolibacter	0.485934	±	0.128325	0.605783	±	0.0806847	0.496829	±	0.0284951	0.514262	±	0.12899	0.237519	±	0.0322474	0.209191	±	0.0719095	0.25931	±	0.0981311	0.209191	±	0.0457606	0.228803	±	0.0510574	0.287638	±	0.0949587	0.239698	±	0.0667737	0.263668	±	0.043527	0.169968	±	0.0471406	0.183042	±	0.0235703	0.185222	±
OTU98	Bacteroidetes	Sphingobacteriia	Sphingobacteriales	Sphingobacteriaceae	Sphingobacterium	0.0108954	±	0.00998578	0.00217908	±	0.00377427	0	±	0	0.00217908	±	0.00377427	0.0370443	±	0.0641626	0	±	0	0	±	0	0	±	0	0.0152535	±	0.0136083	0.0370443	±	0.0481867	0.00217908	±	0.00377427	0.0958794	±	0.112534	0.0261489	±	0.0235703	0.0958794	±	0.154883	0	±
OTU115	Proteobacteria	Gammaproteobacteria	Gammaproteobacteria_unclassified	Gammaproteobacteria_unclassified	Gammaproteobacteria_unclassified	0.248415	±	0.0345918	0.305071	±	0.029478	0.261489	±	0.0397644	0.270205	±	0.046379	0.278922	±	0.045916	0.30725	±	0.0345918	0.254952	±	0.0566141	0.28328	±	0.0548245	0.379159	±	0.101485	0.252773	±	0.0734772	0.418383	±	0.0196117	0.300713	±	0.0949587	0.228803	±	0.049355	0.191759	±	0.029478	0.261489	±
OTU30	Proteobacteria	Alphaproteobacteria	Sphingomonadales	Sphingomonadaceae	Sphingobium	0.00871631	±	0.00754854	0	±	0	0.00871631	±	0.00998578	0.00435815	±	0.00754854	0.0108954	±	0.00998578	0.00871631	±	0.00377427	0.0108954	±	0.00754854	0.00653723	±	0.00653723	0.0130745	±	0.0130745	0.0414025	±	0.0308937	0.028328	±	0.00998578	0.106775	±	0.041517	0.551306	±	0.451037	0.261489	±	0.402079	0.128566	±
OTU69	Proteobacteria	Alphaproteobacteria	Rhizobiales	Hyphomicrobiaceae	Hyphomicrobium	0.230982	±	0.0490655	0.237519	±	0.0199716	0.244057	±	0.0301942	0.252773	±	0.0399431	0.287638	±	0.0976217	0.252773	±	0.0490655	0.272385	±	0.0734772	0.248415	±	0.085735	0.222266	±	0.0803308	0.18958	±	0.0196117	0.25931	±	0.0360043	0.217908	±	0.00998578	0.196117	±	0.0326861	0.244057	±	0.00998578	0.241877	±
OTU111	Acidobacteria	Acidobacteria_Gp10	Gp10	Gp10_unclassified	Gp10_unclassified	0.0871631	±	0.046379	0.0958794	±	0.0136083	0.084984	±	0.0226456	0.0697304	±	0.0301942	0.198296	±	0.126818	0.185222	±	0.0788091	0.23534	±	0.167562	0.193938	±	0.0853186	0.302892	±	0.176908	0.178684	±	0.022958	0.324682	±	0.197672	0.185222	±	0.104255	0.250594	±	0.130962	0.305071	±	0.222778	0.370443	±
OTU59	Proteobacteria	Betaproteobacteria	Rhodocyclales	Rhodocyclaceae	Rhodocyclaceae_unclassified	0.207012	±	0.0628164	0.143819	±	0.0345918	0.154714	±	0.0199716	0.150356	±	0.0623612	0.193938	±	0.0308937	0.183042	±	0.0172959	0.148177	±	0.0929881	0.220087	±	0.0853186	0.274564	±	0.0643842	0.274564	±	0.0130745	0.294175	±	0.085735	0.313787	±	0.0942813	0.207012	±	0.0371723	0.176505	±	0.0864794	0.272385	±
OTU3832	Actinobacteria	Actinobacteria	Actinomycetales	Streptomycetaceae	Streptomyces	0.420562	±	0.117731	0.396592	±	0.0136083	0.291996	±	0.0661306	0.437994	±	0.0363978	0.178684	±	0.0680416	0.217908	±	0.111389	0.335578	±	0.0360043	0.248415	±	0.0345918	0.185222	±	0.0329033	0.14164	±	0.0150971	0.159073	±	0.0371723	0.124207	±	0.0299573	0.167789	±	0.0667737	0.191759	±	0.0607411	0.180863	±
OTU67	Actinobacteria	Actinobacteria	Actinomycetales	Nocardiaceae	Nocardia	0.176505	±	0.040825	0.180863	±	0.0360043	0.180863	±	0.0779915	0.122028	±	0.0210143	0.272385	±	0.182614	0.222266	±	0.0834618	0.372622	±	0.273237	0.359548	±	0.11767	0.300713	±	0.0428675	0.276743	±	0.183664	0.248415	±	0.198392	0.191759	±	0.041517	0.289817	±	0.142075	0.159073	±	0.117185	0.237519	±
OTU2070	Proteobacteria	Alphaproteobacteria	Sphingomonadales	Sphingomonadaceae	Sphingomonas	0.224445	±	0.0322474	0.244057	±	0.0136083	0.244057	±	0.0717112	0.233161	±	0.0979131	0.193938	±	0.091599	0.233161	±	0.0532426	0.265847	±	0.0210143	0.270205	±	0.0322474	0.187401	±	0.0329033	0.148177	±	0.043527	0.215729	±	0.0742487	0.191759	±	0.00998578	0.237519	±	0.102185	0.202654	±	0.0457606	0.318145	±
OTU100	Proteobacteria	Betaproteobacteria	Betaproteobacteria_unclassified	Betaproteobacteria_unclassified	Betaproteobacteria_unclassified	0.309429	±	0.0720085	0.291996	±	0.0812126	0.318145	±	0.0150971	0.237519	±	0.0617875	0.261489	±	0.0588351	0.30725	±	0.0261489	0.150356	±	0.102741	0.268026	±	0.0976217	0.193938	±	0.108867	0.278922	±	0.0887556	0.196117	±	0.0864794	0.180863	±	0.0603883	0.174326	±	0.0136083	0.185222	±	0.10568	0.200475	±
OTU93	Actinobacteria	Actinobacteria	Actinomycetales	Actinomycetales_unclassified	Actinomycetales_unclassified	0.368264	±	0.0853186	0.479397	±	0.0717112	0.405308	±	0.100639	0.409666	±	0.0585924	0.28328	±	0.0264199	0.226624	±	0.0544333	0.398771	±	0.284276	0.276743	±	0.0607411	0.143819	±	0.0770728	0.100238	±	0.0532426	0.150356	±	0.0299573	0.100238	±	0.0247496	0.150356	±	0.0299573	0.122028	±	0.0843108	0.145998	±
OTU57	Proteobacteria	Alphaproteobacteria	Rhodospirillales	Rhodospirillaceae	Skermanella	0.270205	±	0.0654812	0.28328	±	0.0692864	0.278922	±	0.0272167	0.315966	±	0.0785375	0.237519	±	0.094583	0.233161	±	0.0723046	0.298533	±	0.0617875	0.326861	±	0.08165	0.16561	±	0.0617875	0.161252	±	0.0607411	0.159073	±	0.0481867	0.180863	±	0.0136083	0.106775	±	0.0528398	0.198296	±	0.0779915	0.193938	±
OTU86	Proteobacteria	Alphaproteobacteria	Rhodospirillales	Rhodospirillaceae	Lacibacterium	0.152535	±	0.0335465	0.172147	±	0.022958	0.145998	±	0.029478	0.202654	±	0.0261489	0.143819	±	0.0196117	0.156894	±	0.075391	0.185222	±	0.0524339	0.159073	±	0.0394045	0.198296	±	0.0617875	0.25931	±	0.0394045	0.246236	±	0.0763299	0.213549	±	0.0308937	0.16561	±	0.0394045	0.217908	±	0.0717112	0.268026	±
OTU64	Acidobacteria	Acidobacteria_Gp6	Gp6	Gp6_unclassified	Gp6_unclassified	0.163431	±	0.0510574	0.137282	±	0.0172959	0.200475	±	0.0544333	0.145998	±	0.0555985	0.296354	±	0.101765	0.200475	±	0.087054	0.429278	±	0.29128	0.261489	±	0.0299573	0.272385	±	0.0798863	0.198296	±	0.105071	0.261489	±	0.084984	0.281101	±	0.0623612	0.183042	±	0.0235703	0.178684	±	0.0661306	0.222266	±
OTU334	Actinobacteria	Actinobacteria	Actinomycetales	Nocardioidaceae	Nocardioides	0.339936	±	0.141874	0.291996	±	0.0863145	0.289817	±	0.0670929	0.239698	±	0.0734772	0.285459	±	0.115162	0.226624	±	0.0654812	0.285459	±	0.112724	0.224445	±	0.0720085	0.16561	±	0.029478	0.111133	±	0.075391	0.14164	±	0.0335465	0.16561	±	0.0329033	0.122028	±	0.022958	0.167789	±	0.0360043	0.124207	±
OTU85	Acidobacteria	Acidobacteria_Gp6	Gp6	Gp6_unclassified	Gp6_unclassified	0.148177	±	0.0301942	0.172147	±	0.0752018	0.226624	±	0.0634931	0.217908	±	0.0264199	0.213549	±	0.0992138	0.230982	±	0.0329033	0.213549	±	0.0472915	0.230982	±	0.084057	0.291996	±	0.0136083	0.25931	±	0.0654812	0.250594	±	0.0199716	0.285459	±	0.0603883	0.156894	±	0.049355	0.187401	±	0.0774416	0.196117	±
OTU183	Bacteroidetes	Sphingobacteriia	Sphingobacteriales	Chitinophagaceae	Terrimonas	0.187401	±	0.0150971	0.180863	±	0.0394045	0.18958	±	0.0707109	0.137282	±	0.0172959	0.126386	±	0.00377427	0.183042	±	0.0392234	0.148177	±	0.0948086	0.139461	±	0.0247496	0.202654	±	0.126086	0.217908	±	0.0728933	0.222266	±	0.0926812	0.207012	±	0.0329033	0.196117	±	0.0581042	0.18958	±	0.108801	0.233161	±
OTU79	Planctomycetes	Planctomycetia	Planctomycetales	Planctomycetaceae	Pirellula	0.204833	±	0.0728933	0.196117	±	0.0599147	0.241877	±	0.0284951	0.215729	±	0.0172959	0.167789	±	0.0593173	0.161252	±	0.0670929	0.176505	±	0.0569902	0.187401	±	0.0644948	0.167789	±	0.0425339	0.239698	±	0.0528398	0.154714	±	0.0308937	0.220087	±	0.0766093	0.159073	±	0.0634931	0.180863	±	0.022958	0.202654	±
OTU56	Proteobacteria	Alphaproteobacteria	Rhizobiales	Rhizobiales_unclassified	Rhizobiales_unclassified	0.163431	±	0.0397644	0.16561	±	0.0717112	0.207012	±	0.0425339	0.224445	±	0.0752018	0.159073	±	0.0934466	0.14164	±	0.0717112	0.183042	±	0.0130745	0.124207	±	0.0363978	0.163431	±	0.0113228	0.18958	±	0.088434	0.248415	±	0.132691	0.172147	±	0.0383047	0.200475	±	0.094583	0.200475	±	0.153636	0.230982	±
OTU105	Acidobacteria	Acidobacteria_Gp10	Gp10	Gp10_unclassified	Gp10_unclassified	0.159073	±	0.044498	0.143819	±	0.0284951	0.128566	±	0.0490655	0.178684	±	0.0806847	0.135103	±	0.0812126	0.122028	±	0.0571151	0.161252	±	0.00998578	0.178684	±	0.0607411	0.196117	±	0.0457606	0.143819	±	0.0345918	0.200475	±	0.105071	0.172147	±	0.0499289	0.11767	±	0.0113228	0.209191	±	0.0428675	0.150356	±
OTU25	Bacteroidetes	Cytophagia	Cytophagales	Cytophagaceae	Adhaeribacter	0.322503	±	0.0607411	0.416204	±	0.161369	0.368264	±	0.0901885	0.313787	±	0.102741	0.228803	±	0.075391	0.222266	±	0.0471406	0.233161	±	0.0481867	0.202654	±	0.0834618	0.185222	±	0.0420285	0.115491	±	0.0308937	0.196117	±	0.0623612	0.132924	±	0.0607411	0.108954	±	0.046379	0.115491	±	0.0843108	0.128566	±
OTU81	Actinobacteria	Actinobacteria	Actinomycetales	Microbacteriaceae	Microbacterium	0.0130745	±	0.00653723	0.0174326	±	0.00754854	0.0261489	±	0.0235703	0.0196117	±	0.0130745	0.0522978	±	0.0261489	0.028328	±	0.0164517	0.0305071	±	0.0199716	0.0326861	±	0.0196117	0.0828049	±	0.120777	0.0392234	±	0.0326861	0.0610141	±	0.00754854	0.104596	±	0.0707109	0.152535	±	0.0335465	0.126386	±	0.111389	0.0522978	±
OTU261	Proteobacteria	Betaproteobacteria	Betaproteobacteria_unclassified	Betaproteobacteria_unclassified	Betaproteobacteria_unclassified	0.128566	±	0.0723046	0.0958794	±	0.0247496	0.124207	±	0.00653723	0.145998	±	0.043527	0.154714	±	0.0524339	0.111133	±	0.049355	0.143819	±	0.0284951	0.209191	±	0.0457606	0.217908	±	0.0494991	0.222266	±	0.0510574	0.244057	±	0.11479	0.276743	±	0.0634931	0.180863	±	0.0490655	0.169968	±	0.0588351	0.298533	±
OTU58	Chloroflexi	Chloroflexia	Chloroflexia_unclassified	Chloroflexia_unclassified	Chloroflexia_unclassified	0.126386	±	0.00754854	0.0958794	±	0.0571151	0.137282	±	0.00653723	0.14164	±	0.0335465	0.154714	±	0.0322474	0.169968	±	0.0457606	0.191759	±	0.112534	0.183042	±	0.0535095	0.213549	±	0.105071	0.176505	±	0.040825	0.172147	±	0.00377427	0.198296	±	0.084057	0.150356	±	0.075391	0.174326	±	0.0877873	0.244057	±
OTU53	Proteobacteria	Gammaproteobacteria	Xanthomonadales	Sinobacteraceae	Povalibacter	0.200475	±	0.0906611	0.209191	±	0.0261489	0.237519	±	0.0728933	0.246236	±	0.107881	0.152535	±	0.0494991	0.159073	±	0.0264199	0.156894	±	0.0569902	0.145998	±	0.101345	0.276743	±	0.0329033	0.239698	±	0.0699005	0.202654	±	0.0558541	0.172147	±	0.0686668	0.0980584	±	0.0172959	0.150356	±	0.075391	0.237519	±
OTU29	Bacteroidetes	Sphingobacteriia	Sphingobacteriales	Chitinophagaceae	Flavisolibacter	0.361727	±	0.105071	0.414025	±	0.184245	0.296354	±	0.0644948	0.285459	±	0.043527	0.169968	±	0.0392234	0.244057	±	0.0301942	0.176505	±	0.0261489	0.215729	±	0.0196117	0.176505	±	0.0879494	0.150356	±	0.0345918	0.145998	±	0.0360043	0.145998	±	0.0371723	0.11767	±	0.0261489	0.139461	±	0.0383047	0.122028	±
OTU61	Actinobacteria	Actinobacteria	Actinomycetales	Nocardioidaceae	Nocardioides	0.28328	±	0.0705092	0.30725	±	0.089872	0.28328	±	0.0494991	0.342115	±	0.132099	0.274564	±	0.100639	0.163431	±	0.0792597	0.226624	±	0.0593173	0.209191	±	0.0428675	0.185222	±	0.0983486	0.0893421	±	0.0164517	0.100238	±	0.0499289	0.145998	±	0.0779915	0.135103	±	0.00998578	0.0893421	±	0.0532426	0.139461	±
OTU415	Actinobacteria	Actinobacteria	Actinomycetales	Micromonosporaceae	Micromonosporaceae_unclassified	0.204833	±	0.0377427	0.220087	±	0.043527	0.222266	±	0.0581042	0.21137	±	0.0617875	0.185222	±	0.0548245	0.18958	±	0.0235703	0.191759	±	0.0164517	0.220087	±	0.0571151	0.302892	±	0.219687	0.172147	±	0.0723046	0.132924	±	0.088996	0.126386	±	0.0763299	0.150356	±	0.0172959	0.204833	±	0.162425	0.14164	±
OTU116	Actinobacteria	Actinobacteria	Solirubrobacterales	Solirubrobacteraceae	Solirubrobacter	0.23534	±	0.084984	0.241877	±	0.0345918	0.239698	±	0.0728933	0.193938	±	0.0394045	0.237519	±	0.0853186	0.196117	±	0.0926812	0.270205	±	0.0785375	0.200475	±	0.029478	0.111133	±	0.0261489	0.139461	±	0.00998578	0.163431	±	0.101485	0.172147	±	0.0607411	0.111133	±	0.0363978	0.145998	±	0.0383047	0.161252	±
OTU225	Proteobacteria	Betaproteobacteria	Rhodocyclales	Rhodocyclaceae	Rhodocyclaceae_unclassified	0.14164	±	0.0686668	0.132924	±	0.0136083	0.111133	±	0.0113228	0.152535	±	0.0264199	0.222266	±	0.0736708	0.233161	±	0.0472915	0.198296	±	0.029478	0.193938	±	0.0692864	0.220087	±	0.0593173	0.185222	±	0.0164517	0.270205	±	0.0394045	0.176505	±	0.092219	0.145998	±	0.0272167	0.102417	±	0.045916	0.159073	±
OTU860	Proteobacteria	Betaproteobacteria	Burkholderiales	Burkholderiales_unclassified	Burkholderiales_unclassified	0.056656	±	0.0308937	0.0479397	±	0.0199716	0.0414025	±	0.0264199	0.0522978	±	0.0428675	0.0675514	±	0.0188714	0.0871631	±	0.022958	0.0915212	±	0.0345918	0.0871631	±	0.044498	0.0610141	±	0.0164517	0.163431	±	0.0942813	0.368264	±	0.476919	0.115491	±	0.0199716	0.291996	±	0.154192	0.226624	±	0.142376	0.148177	±
OTU309	Proteobacteria	Alphaproteobacteria	Rhizobiales	Rhizobiales_unclassified	Rhizobiales_unclassified	0.145998	±	0.0399431	0.124207	±	1.69967e-17	0.172147	±	0.0779915	0.187401	±	0.0790798	0.193938	±	0.046379	0.161252	±	0.0264199	0.14164	±	0.0188714	0.180863	±	0.0817372	0.18958	±	0.0795288	0.180863	±	0.0790798	0.18958	±	0.0196117	0.139461	±	0.0658067	0.176505	±	0.0784468	0.169968	±	0.0518877	0.193938	±
OTU82	Proteobacteria	Deltaproteobacteria	Deltaproteobacteria_unclassified	Deltaproteobacteria_unclassified	Deltaproteobacteria_unclassified	0.21137	±	0.0798863	0.198296	±	0.029478	0.233161	±	0.0210143	0.143819	±	0.0326861	0.198296	±	0.0308937	0.263668	±	0.0723046	0.137282	±	0.0864794	0.224445	±	0.0371723	0.148177	±	0.091599	0.220087	±	0.0264199	0.148177	±	0.0827762	0.198296	±	0.0322474	0.113312	±	0.0425339	0.135103	±	0.0555985	0.135103	±
OTU45	Bacteria_unclassified	Bacteria_unclassified	Bacteria_unclassified	Bacteria_unclassified	Bacteria_unclassified	0.104596	±	1.69967e-17	0.108954	±	0.0329033	0.119849	±	0.0593173	0.113312	±	0.0322474	0.178684	±	0.0607411	0.18958	±	0.0518877	0.183042	±	0.0397644	0.196117	±	0.068874	0.156894	±	0.0599147	0.185222	±	0.0507776	0.202654	±	0.0742487	0.226624	±	0.100072	0.139461	±	0.046379	0.163431	±	0.0363978	0.169968	±
OTU27	Candidatus_Saccharibacteria	Candidatus_Saccharibacteria_unclassified	Candidatus_Saccharibacteria_unclassified	Candidatus_Saccharibacteria_unclassified	Candidatus_Saccharibacteria_unclassified	0	±	0	0	±	0	0	±	0	0	±	0	0.0108954	±	0.00998578	0.00217908	±	0.00377427	0.0217908	±	0.00377427	0.00217908	±	0.00377427	0.0174326	±	0.0136083	0.0435815	±	0.0585924	0.553485	±	0.801453	0.522978	±	0.484285	0.771393	±	1.01249	0.21137	±	0.241907	0.390055	±
OTU150	candidate_division_WPS-1	candidate_division_WPS-1_unclassified	candidate_division_WPS-1_unclassified	candidate_division_WPS-1_unclassified	candidate_division_WPS-1_unclassified	0.169968	±	0.0663456	0.176505	±	0.0345918	0.167789	±	0.0827762	0.169968	±	0.0235703	0.124207	±	0.0457606	0.187401	±	0.0983486	0.0893421	±	0.0607411	0.183042	±	0.0707109	0.178684	±	0.0247496	0.139461	±	0.0548245	0.167789	±	0.0720085	0.154714	±	0.0532426	0.0871631	±	0.043527	0.124207	±	0.0345918	0.14164	±
OTU52	Planctomycetes	Planctomycetia	Planctomycetales	Planctomycetaceae	Gemmata	0.115491	±	0.046379	0.128566	±	0.0136083	0.213549	±	0.0774416	0.152535	±	0.0164517	0.0740886	±	0.045916	0.145998	±	0.0692864	0.104596	±	0.0172959	0.200475	±	0.0617875	0.159073	±	0.0832909	0.178684	±	0.10867	0.148177	±	0.0199716	0.185222	±	0.115162	0.139461	±	0.0607411	0.135103	±	0.0717112	0.222266	±
OTU470	Proteobacteria	Betaproteobacteria	Burkholderiales	Oxalobacteraceae	Noviherbaspirillum	0.291996	±	0.0563619	0.305071	±	0.0720085	0.285459	±	0.0790798	0.344294	±	0.0705092	0.220087	±	0.0593173	0.252773	±	0.0490655	0.185222	±	0.0827762	0.239698	±	0.0210143	0.0915212	±	0.0284951	0.0828049	±	0.022958	0.104596	±	0.0284951	0.0675514	±	0.00754854	0.0697304	±	0.043527	0.143819	±	0.0397644	0.0980584	±
OTU42	Actinobacteria	Thermoleophilia	Thermoleophilales	Thermoleophilaceae	Thermoleophilum	0.174326	±	0.0150971	0.156894	±	0.0299573	0.126386	±	0.0371723	0.156894	±	0.040825	0.196117	±	0.0196117	0.185222	±	0.0555985	0.244057	±	0.0247496	0.230982	±	0.0593173	0.187401	±	0.0499289	0.145998	±	0.114417	0.128566	±	0.0247496	0.102417	±	0.041517	0.122028	±	0.0425339	0.126386	±	0.0377427	0.137282	±
OTU121	Verrucomicrobia	Spartobacteria	Spartobacteria_unclassified	Spartobacteria_unclassified	Spartobacteria_unclassified	0.21137	±	0.045916	0.202654	±	0.0795288	0.204833	±	0.0360043	0.187401	±	0.0628164	0.209191	±	0.0566141	0.14164	±	0.0686668	0.200475	±	0.0705092	0.204833	±	0.0827762	0.126386	±	0.0617875	0.154714	±	0.11479	0.169968	±	0.0643842	0.137282	±	0.0864794	0.145998	±	0.0329033	0.124207	±	0.0510574	0.122028	±
OTU251	Actinobacteria	Actinobacteria	Gaiellales	Gaiellaceae	Gaiella	0.178684	±	0.0371723	0.169968	±	0.00653723	0.196117	±	0.0345918	0.191759	±	0.0998578	0.135103	±	0.043527	0.169968	±	0.075391	0.135103	±	0.0528398	0.185222	±	0.091832	0.143819	±	0.0345918	0.154714	±	0.0507776	0.16561	±	0.0952583	0.126386	±	0.0188714	0.0762677	±	0.0210143	0.113312	±	0.091832	0.111133	±
OTU5887	Proteobacteria	Alphaproteobacteria	Sphingomonadales	Sphingomonadaceae	Sphingomonas	0.111133	±	0.0113228	0.122028	±	0.0272167	0.122028	±	0.0247496	0.139461	±	0.0136083	0.152535	±	0.104255	0.148177	±	0.0199716	0.18958	±	0.0566141	0.150356	±	0.068874	0.115491	±	0.0877873	0.113312	±	0.0420285	0.187401	±	0.125122	0.139461	±	0.046379	0.16561	±	0.124779	0.150356	±	0.0518877	0.180863	±
OTU39	Proteobacteria	Alphaproteobacteria	Rhodospirillales	Rhodospirillaceae	Rhodospirillaceae_unclassified	0.0958794	±	0.0188714	0.0806258	±	0.0264199	0.0871631	±	0.0247496	0.0806258	±	0.0264199	0.21137	±	0.0779915	0.16561	±	0.075768	0.115491	±	0.0644948	0.176505	±	0.0299573	0.187401	±	0.046379	0.196117	±	0.0284951	0.148177	±	0.0360043	0.172147	±	0.0399431	0.130745	±	0.0599147	0.137282	±	0.0113228	0.128566	±
OTU341	Proteobacteria	Deltaproteobacteria	Myxococcales	Kofleriaceae	Kofleria	0.172147	±	0.0494991	0.21137	±	0.0360043	0.263668	±	0.0499289	0.270205	±	0.043527	0.14164	±	0.0264199	0.202654	±	0.0691835	0.152535	±	0.0472915	0.139461	±	0.0308937	0.187401	±	0.0399431	0.139461	±	0.091599	0.132924	±	0.0247496	0.126386	±	0.0264199	0.0893421	±	0.0188714	0.11767	±	0.0130745	0.0719095	±
OTU80	Proteobacteria	Gammaproteobacteria	Xanthomonadales	Xanthomonadaceae	Stenotrophomonas	0	±	0	0.00435815	±	0.00754854	0.0108954	±	0.0188714	0.00435815	±	0.00377427	0.00653723	±	0.0113228	0	±	0	0	±	0	0.00217908	±	0.00377427	0.0130745	±	0.0226456	0.00217908	±	0.00377427	0.00653723	±	0.0113228	0.130745	±	0.124722	0.333399	±	0.503876	0.108954	±	0.166582	0	±
OTU46	Firmicutes	Bacilli	Bacillales	Bacillaceae_1	Bacillus	0.228803	±	0.075391	0.202654	±	0.0663456	0.167789	±	0.043527	0.132924	±	0.0555985	0.139461	±	0.0264199	0.23534	±	0.116208	0.161252	±	0.0563619	0.172147	±	0.0164517	0.139461	±	0.0383047	0.100238	±	0.00998578	0.115491	±	0.0628164	0.143819	±	0.0510574	0.11767	±	0.0623612	0.11767	±	0.0566141	0.176505	±
OTU323	Proteobacteria	Alphaproteobacteria	Rhizobiales	Methylobacteriaceae	Microvirga	0.108954	±	0.0383047	0.0828049	±	0.00998578	0.0937003	±	0.0322474	0.167789	±	0.075768	0.150356	±	0.0770728	0.191759	±	0.0272167	0.163431	±	0.0599147	0.126386	±	0.0136083	0.139461	±	0.0981311	0.0828049	±	0.044498	0.100238	±	0.0544333	0.130745	±	0.0339684	0.159073	±	0.101345	0.156894	±	0.142476	0.191759	±
OTU801	Actinobacteria	Actinobacteria	Actinomycetales	Microbacteriaceae	Microbacterium	0.100238	±	0.043527	0.0588351	±	0.0130745	0.113312	±	0.0322474	0.0522978	±	0.00653723	0.056656	±	0.0264199	0.0414025	±	0.0164517	0.122028	±	0.0544333	0.0893421	±	0.0335465	0.0915212	±	0.0339684	0.0871631	±	0.0210143	0.16561	±	0.0555985	0.176505	±	0.0392234	0.169968	±	0.0819113	0.207012	±	0.170637	0.191759	±
OTU92	Proteobacteria	Alphaproteobacteria	Sphingomonadales	Erythrobacteraceae	Erythrobacteraceae_unclassified	0.220087	±	0.111197	0.252773	±	0.0877873	0.176505	±	0.040825	0.224445	±	0.100072	0.193938	±	0.0210143	0.187401	±	0.0371723	0.300713	±	0.0284951	0.226624	±	0.0563619	0.135103	±	0.0585924	0.115491	±	0.0335465	0.106775	±	0.0481867	0.124207	±	0.0235703	0.111133	±	0.0457606	0.113312	±	0.0335465	0.0980584	±
OTU117	Chloroflexi	Chloroflexi_unclassified	Chloroflexi_unclassified	Chloroflexi_unclassified	Chloroflexi_unclassified	0.18958	±	0.0397644	0.215729	±	0.0623612	0.250594	±	0.0371723	0.178684	±	0.0692864	0.152535	±	0.0705092	0.159073	±	0.0188714	0.145998	±	0.0563619	0.122028	±	0.0136083	0.137282	±	0.0363978	0.159073	±	0.0680416	0.126386	±	0.0774416	0.11767	±	0.0261489	0.106775	±	0.0264199	0.106775	±	0.0555985	0.102417	±
OTU76	Acidobacteria	Acidobacteria_Gp3	Gp3	Gp3_unclassified	Gp3_unclassified	0.193938	±	0.0499289	0.169968	±	0.0581042	0.204833	±	0.045916	0.122028	±	0.0272167	0.100238	±	0.0272167	0.193938	±	0.029478	0.119849	±	0.043527	0.150356	±	0.0113228	0.0828049	±	0.0136083	0.196117	±	0.040825	0.0871631	±	0.0210143	0.102417	±	0.0199716	0.124207	±	0.0643842	0.139461	±	0.0892358	0.102417	±
OTU43	Bacteroidetes	Flavobacteriia	Flavobacteriales	Flavobacteriaceae	Flavobacterium	0	±	0	0	±	0	0	±	0	0	±	0	0	±	0	0	±	0	0	±	0	0	±	0	0	±	0	0	±	0	0	±	0	0	±	0	0	±	0	0	±	0	0	±
OTU106	Actinobacteria	Actinobacteria	Actinomycetales	Nocardioidaceae	Nocardioides	0.191759	±	0.0507776	0.217908	±	0.0798863	0.183042	±	0.0599147	0.169968	±	0.0643842	0.156894	±	0.111708	0.156894	±	0.0299573	0.130745	±	0.0942813	0.180863	±	0.109454	0.115491	±	0.0563619	0.0501188	±	0.00754854	0.0958794	±	0.045916	0.0806258	±	0.0555985	0.115491	±	0.0654812	0.111133	±	0.0172959	0.126386	±
OTU357	Chloroflexi	Anaerolineae	Anaerolineales	Anaerolineaceae	Anaerolineaceae_unclassified	0.122028	±	0.0490655	0.0828049	±	0.0247496	0.132924	±	0.0308937	0.104596	±	0.0299573	0.106775	±	0.0603883	0.152535	±	0.0150971	0.0937003	±	0.0563619	0.132924	±	0.0532426	0.161252	±	0.0394045	0.204833	±	0.0399431	0.161252	±	0.0164517	0.150356	±	0.0235703	0.11767	±	0.0566141	0.113312	±	0.0360043	0.0958794	±
OTU330	Acidobacteria	Acidobacteria_Gp4	Gp4	Gp4_unclassified	Gp4_unclassified	0.132924	±	0.0188714	0.18958	±	0.0326861	0.137282	±	0.0345918	0.183042	±	0.0113228	0.185222	±	0.0544333	0.200475	±	0.0705092	0.124207	±	0.0535095	0.16561	±	0.0490655	0.130745	±	0.0299573	0.137282	±	0.0727955	0.124207	±	0.0707109	0.128566	±	0.0593173	0.0828049	±	0.0377427	0.126386	±	0.0188714	0.124207	±
OTU72	Bacteroidetes	Sphingobacteriia	Sphingobacteriales	Chitinophagaceae	Flavitalea	0.154714	±	0.0555985	0.172147	±	0.0952583	0.132924	±	0.0607411	0.183042	±	0.0130745	0.126386	±	0.0720085	0.104596	±	0.0326861	0.119849	±	0.0377427	0.124207	±	0.0581042	0.0762677	±	0.0210143	0.084984	±	0.0345918	0.0740886	±	0.0335465	0.113312	±	0.00377427	0.113312	±	0.0150971	0.135103	±	0.00998578	0.161252	±
OTU118	Acidobacteria	Acidobacteria_Gp6	Gp6	Gp6_unclassified	Gp6_unclassified	0.104596	±	0.0235703	0.102417	±	0.029478	0.111133	±	0.0196117	0.0784468	±	0.0172959	0.150356	±	0.0363978	0.174326	±	0.0301942	0.178684	±	0.0555985	0.239698	±	0.0555985	0.21137	±	0.0617875	0.154714	±	0.0617875	0.191759	±	0.075768	0.185222	±	0.0164517	0.106775	±	0.0210143	0.130745	±	0.0623612	0.126386	±
OTU90	Proteobacteria	Deltaproteobacteria	Deltaproteobacteria_unclassified	Deltaproteobacteria_unclassified	Deltaproteobacteria_unclassified	0.115491	±	0.0322474	0.084984	±	0.0172959	0.084984	±	0.0113228	0.115491	±	0.022958	0.122028	±	0.0585924	0.11767	±	0.0261489	0.213549	±	0.0499289	0.161252	±	0.0593173	0.167789	±	0.0247496	0.16561	±	0.0425339	0.106775	±	0.00754854	0.154714	±	0.0199716	0.0937003	±	0.045916	0.122028	±	0.0308937	0.14164	±
OTU160	Proteobacteria	Betaproteobacteria	Burkholderiales	Alcaligenaceae	Achromobacter	0.00217908	±	0.00377427	0.00871631	±	0.00377427	0.00217908	±	0.00377427	0	±	0	0.0479397	±	0.0383047	0.0152535	±	0.00998578	0.0305071	±	0.00754854	0.00653723	±	0.00653723	0.183042	±	0.300215	0.0479397	±	0.0394045	0.0261489	±	0.0226456	0.0522978	±	0.0397644	0.0544769	±	0.0524339	0.148177	±	0.0644948	0.130745	±
OTU899	Proteobacteria	Betaproteobacteria	Burkholderiales	Comamonadaceae	Ramlibacter	0.152535	±	0.0394045	0.106775	±	0.0322474	0.176505	±	0.0623612	0.169968	±	0.0235703	0.122028	±	0.0585924	0.108954	±	0.0272167	0.084984	±	0.0363978	0.104596	±	0.0719095	0.111133	±	0.0558541	0.0937003	±	0.0264199	0.0828049	±	0.0210143	0.191759	±	0.128492	0.115491	±	0.0308937	0.122028	±	0.0199716	0.111133	±
OTU95	Acidobacteria	Acidobacteria_Gp6	Gp6	Gp6_unclassified	Gp6_unclassified	0.220087	±	0.0925274	0.161252	±	0.0360043	0.244057	±	0.00377427	0.222266	±	0.0428675	0.124207	±	0.0428675	0.130745	±	0.0196117	0.0980584	±	0.0363978	0.102417	±	0.0371723	0.115491	±	0.0779915	0.115491	±	0.043527	0.130745	±	0.092219	0.0719095	±	0.0130745	0.0697304	±	0.0188714	0.122028	±	0.0371723	0.113312	±
OTU63	Acidobacteria	Acidobacteria_Gp6	Gp6	Gp6_unclassified	Gp6_unclassified	0.193938	±	0.0136083	0.154714	±	0.00754854	0.250594	±	0.0641626	0.163431	±	0.0742487	0.108954	±	0.029478	0.156894	±	0.0363978	0.128566	±	0.0925274	0.139461	±	0.0507776	0.0828049	±	0.00754854	0.108954	±	0.0563619	0.106775	±	0.0494991	0.191759	±	0.0734772	0.106775	±	0.0272167	0.132924	±	0.0360043	0.0610141	±
OTU226	Proteobacteria	Alphaproteobacteria	Rhizobiales	Rhizobiaceae	Rhizobium	0.139461	±	0.0644948	0.0915212	±	0.0284951	0.0261489	±	0.0226456	0.0610141	±	0.0617875	0.0392234	±	0.0172959	0.056656	±	0.0399431	0.0588351	±	0.0457606	0.0631932	±	0.0308937	0.0828049	±	0.0164517	0.0828049	±	0.0371723	0.0631932	±	0.00754854	0.0871631	±	0.0272167	0.130745	±	0.084984	0.135103	±	0.046379	0.126386	±
OTU333	Proteobacteria	Alphaproteobacteria	Caulobacterales	Caulobacteraceae	Phenylobacterium	0.150356	±	0.0196117	0.0697304	±	0.0136083	0.0806258	±	0.0335465	0.148177	±	0.0607411	0.198296	±	0.046379	0.176505	±	0.0535095	0.217908	±	0.14768	0.122028	±	0.0705092	0.183042	±	0.0784468	0.0893421	±	0.0136083	0.084984	±	0.0130745	0.143819	±	0.0284951	0.106775	±	0.0264199	0.152535	±	0.13498	0.124207	±
OTU8356	Actinobacteria	Actinobacteria	Actinomycetales	Mycobacteriaceae	Mycobacterium	0.00871631	±	0.00998578	0.0174326	±	0.00998578	0.0239698	±	0.0150971	0.0152535	±	0.00754854	0.0370443	±	0.022958	0.0457606	±	0.0113228	0.0828049	±	0.0720085	0.0348652	±	0.0247496	0.108954	±	0.143571	0.0435815	±	0.0199716	0.0697304	±	0.0188714	0.0305071	±	0.0164517	0.0871631	±	0.0264199	0.104596	±	0.0630428	0.084984	±
OTU184	Acidobacteria	Acidobacteria_Gp6	Gp6	Gp6_unclassified	Gp6_unclassified	0.111133	±	0.0428675	0.150356	±	0.00653723	0.161252	±	0.00754854	0.124207	±	0.0235703	0.108954	±	0.0906611	0.115491	±	0.0563619	0.106775	±	0.044498	0.143819	±	0.0679369	0.115491	±	0.0720085	0.161252	±	0.0593173	0.106775	±	0.0499289	0.176505	±	0.0510574	0.137282	±	0.117852	0.119849	±	0.022958	0.0784468	±
OTU65	Proteobacteria	Alphaproteobacteria	Rhizobiales	Rhizobiales_unclassified	Rhizobiales_unclassified	0.0893421	±	0.0308937	0.0915212	±	0.0226456	0.113312	±	0.0136083	0.126386	±	0.043527	0.145998	±	0.0136083	0.143819	±	0.0727955	0.104596	±	0.0363978	0.124207	±	0.0363978	0.0653723	±	0.0130745	0.0915212	±	0.0113228	0.104596	±	0.0130745	0.161252	±	0.0853186	0.0740886	±	0.043527	0.113312	±	0.0720085	0.128566	±
OTU157	Proteobacteria	Alphaproteobacteria	Rhizobiales	Rhizobiales_unclassified	Rhizobiales_unclassified	0.113312	±	0.0507776	0.167789	±	0.0264199	0.156894	±	0.0834618	0.150356	±	0.0299573	0.11767	±	0.0172959	0.111133	±	0.0397644	0.130745	±	0.0345918	0.084984	±	0.00653723	0.161252	±	0.0607411	0.126386	±	0.0247496	0.104596	±	0.0226456	0.0958794	±	0.00998578	0.0871631	±	0.0150971	0.0828049	±	0.0544333	0.0828049	±
OTU41	Bacteroidetes	Sphingobacteriia	Sphingobacteriales	Chitinophagaceae	Chitinophagaceae_unclassified	0.14164	±	0.0322474	0.145998	±	0.0528398	0.161252	±	0.044498	0.174326	±	0.0499289	0.0937003	±	0.0499289	0.104596	±	0.0428675	0.0806258	±	0.043527	0.102417	±	0.0360043	0.0784468	±	0.0226456	0.161252	±	0.0593173	0.0806258	±	0.00998578	0.126386	±	0.0699005	0.0697304	±	0.0150971	0.132924	±	0.0720085	0.115491	±
OTU133	Planctomycetes	Planctomycetia	Planctomycetales	Planctomycetaceae	Planctomycetaceae_unclassified	0.115491	±	0.00754854	0.100238	±	0.0247496	0.124207	±	0.0428675	0.143819	±	0.0397644	0.124207	±	0.0172959	0.108954	±	0.0164517	0.124207	±	0.0284951	0.198296	±	0.0607411	0.132924	±	0.046379	0.130745	±	0.0599147	0.132924	±	0.0420285	0.145998	±	0.0717112	0.111133	±	0.0457606	0.104596	±	0.0339684	0.0915212	±
OTU230	Actinobacteria	Actinobacteria	Actinomycetales	Actinomycetales_unclassified	Actinomycetales_unclassified	0.191759	±	0.0472915	0.193938	±	0.0507776	0.180863	±	0.0247496	0.172147	±	0.046379	0.113312	±	0.0199716	0.0828049	±	0.022958	0.159073	±	0.0425339	0.167789	±	0.0952583	0.115491	±	0.058956	0.0828049	±	0.022958	0.122028	±	0.0585924	0.0893421	±	0.0322474	0.0588351	±	0.0172959	0.0762677	±	0.022958	0.0915212	±
OTU145	Gemmatimonadetes	Gemmatimonadetes	Gemmatimonadales	Gemmatimonadaceae	Gemmatimonas	0.0610141	±	0.0360043	0.0653723	±	0.0299573	0.0980584	±	0.0428675	0.0871631	±	0.0555985	0.163431	±	0.0452913	0.122028	±	0.044498	0.126386	±	0.0420285	0.163431	±	0.0299573	0.202654	±	0.0682507	0.237519	±	0.107881	0.178684	±	0.0420285	0.137282	±	0.0130745	0.104596	±	0.0623612	0.119849	±	0.0383047	0.106775	±
OTU318	Proteobacteria	Alphaproteobacteria	Rhizobiales	Bradyrhizobiaceae	Bosea	0.0174326	±	0.00377427	0.0239698	±	0.0199716	0.0305071	±	0.0264199	0.0239698	±	0.0308937	0.0719095	±	0.0397644	0.0370443	±	0.00377427	0.056656	±	0.0136083	0.0370443	±	0.0136083	0.0893421	±	0.0699005	0.0305071	±	0.0247496	0.0522978	±	0.049355	0.0697304	±	0.0528398	0.14164	±	0.043527	0.084984	±	0.0518877	0.119849	±
OTU99	Proteobacteria	Betaproteobacteria	Burkholderiales	Comamonadaceae	Variovorax	0.0675514	±	0.0607411	0.0348652	±	0.00754854	0.0174326	±	0.00377427	0.028328	±	0.00377427	0.0370443	±	0.0528398	0.028328	±	0.0150971	0.0152535	±	0.0210143	0.0174326	±	0.0136083	0.00435815	±	0.00754854	0.0392234	±	0.0397644	0.0261489	±	0.0172959	0.0457606	±	0.0299573	0.0828049	±	0.029478	0.0305071	±	0.00998578	0.0370443	±
OTU77	Acidobacteria	Acidobacteria_Gp3	Gp3	Gp3_unclassified	Gp3_unclassified	0.0958794	±	0.00754854	0.154714	±	0.046379	0.196117	±	0.0261489	0.143819	±	0.0397644	0.108954	±	0.0528398	0.100238	±	0.0150971	0.104596	±	0.040825	0.148177	±	0.0621323	0.113312	±	0.0360043	0.113312	±	0.0335465	0.0871631	±	0.0399431	0.0893421	±	0.0264199	0.0937003	±	0.0188714	0.0915212	±	0.040825	0.0457606	±
OTU109	Proteobacteria	Alphaproteobacteria	Rhodospirillales	Rhodospirillales_unclassified	Rhodospirillales_unclassified	0.0631932	±	0.0420285	0.106775	±	0.0136083	0.0784468	±	0.0235703	0.115491	±	0.0371723	0.16561	±	0.0822583	0.11767	±	0.0113228	0.0828049	±	0.0210143	0.14164	±	0.075768	0.16561	±	0.0394045	0.102417	±	0.043527	0.106775	±	0.0188714	0.115491	±	0.0264199	0.128566	±	0.0752018	0.113312	±	0.0481867	0.102417	±
OTU94	Verrucomicrobia	Subdivision3	Subdivision3_unclassified	Subdivision3_unclassified	Subdivision3_unclassified	0.11767	±	0.0363978	0.119849	±	0.0593173	0.115491	±	0.022958	0.11767	±	0.0682507	0.135103	±	0.0308937	0.106775	±	0.0425339	0.172147	±	0.0394045	0.132924	±	0.0555985	0.111133	±	0.0113228	0.0697304	±	0.0272167	0.124207	±	0.0457606	0.122028	±	0.0532426	0.111133	±	0.0518877	0.0871631	±	0.0641626	0.11767	±
OTU135	Proteobacteria	Betaproteobacteria	Betaproteobacteria_unclassified	Betaproteobacteria_unclassified	Betaproteobacteria_unclassified	0.150356	±	0.0299573	0.128566	±	0.0322474	0.178684	±	0.0544333	0.185222	±	0.0210143	0.139461	±	0.0210143	0.143819	±	0.0630428	0.0915212	±	0.0299573	0.150356	±	0.040825	0.102417	±	0.0472915	0.143819	±	0.0172959	0.119849	±	0.0150971	0.115491	±	0.0164517	0.0958794	±	0.0399431	0.0893421	±	0.0210143	0.0915212	±
OTU96	Proteobacteria	Betaproteobacteria	Burkholderiales	Burkholderiales_incertae_sedis	Burkholderiales_incertae_sedis_unclassified	0.0915212	±	0.0345918	0.0610141	±	0.0164517	0.0915212	±	0.0299573	0.11767	±	0.0588351	0.139461	±	0.0308937	0.163431	±	0.0452913	0.0937003	±	0.0720085	0.130745	±	0.0345918	0.100238	±	0.058956	0.122028	±	0.0507776	0.11767	±	0.0326861	0.0893421	±	0.0188714	0.0958794	±	0.0150971	0.126386	±	0.0360043	0.0784468	±
OTU87	Nitrospirae	Nitrospira	Nitrospirales	Nitrospiraceae	Nitrospira	0.213549	±	0.0644948	0.174326	±	0.0329033	0.152535	±	0.041517	0.16561	±	0.0544333	0.119849	±	0.00754854	0.0893421	±	0.00377427	0.124207	±	0.0261489	0.0871631	±	0.029478	0.122028	±	0.0308937	0.11767	±	0.0235703	0.084984	±	0.0397644	0.0893421	±	0.0264199	0.0740886	±	0.0360043	0.0762677	±	0.0377427	0.0784468	±
OTU142	Planctomycetes	Planctomycetia	Planctomycetales	Planctomycetaceae	Zavarzinella	0.0937003	±	0.0301942	0.0762677	±	0.0335465	0.0958794	±	0.022958	0.100238	±	0.0399431	0.0653723	±	0.0457606	0.0937003	±	0.044498	0.0937003	±	0.0264199	0.0915212	±	0.0172959	0.0958794	±	0.0499289	0.124207	±	0.0299573	0.137282	±	0.0854854	0.084984	±	0.0261489	0.0806258	±	0.0264199	0.156894	±	0.0196117	0.0958794	±
OTU147	Actinobacteria	Actinobacteria	Acidimicrobiales	Acidimicrobineae_incertae_sedis	Aciditerrimonas	0.0326861	±	0.0299573	0.0719095	±	0.0235703	0.0631932	±	0.045916	0.0610141	±	0.00377427	0.126386	±	0.100072	0.126386	±	0.058956	0.126386	±	0.0555985	0.143819	±	0.0261489	0.222266	±	0.084984	0.122028	±	0.0377427	0.207012	±	0.0394045	0.0980584	±	0.075391	0.0871631	±	0.0607411	0.0653723	±	0.0113228	0.169968	±
OTU345	Planctomycetes	Planctomycetia	Planctomycetales	Planctomycetaceae	Planctomycetaceae_unclassified	0.0675514	±	0.00998578	0.102417	±	0.0360043	0.0501188	±	0.022958	0.122028	±	0.0654812	0.0501188	±	0.0136083	0.104596	±	0.0566141	0.084984	±	0.00653723	0.0871631	±	0.0360043	0.0871631	±	0.0199716	0.11767	±	0.0535095	0.122028	±	0.0272167	0.150356	±	0.0130745	0.0697304	±	0.00754854	0.0937003	±	0.0377427	0.143819	±
OTU54	Candidatus_Saccharibacteria	Candidatus_Saccharibacteria_unclassified	Candidatus_Saccharibacteria_unclassified	Candidatus_Saccharibacteria_unclassified	Candidatus_Saccharibacteria_unclassified	0.00217908	±	0.00377427	0	±	0	0.00653723	±	0.0113228	0	±	0	0	±	0	0.0305071	±	0.0528398	0.0370443	±	0.0585924	0.00871631	±	0.0150971	0.0305071	±	0.0528398	0.139461	±	0.159773	0.573097	±	0.562404	0.156894	±	0.103775	0.0326861	±	0.0566141	0.0784468	±	0.135874	0.305071	±
OTU383	Firmicutes	Clostridia	Clostridiales	Clostridiaceae_1	Clostridium_sensu_stricto	0.135103	±	0.046379	0.237519	±	0.0887556	0.111133	±	0.0363978	0.111133	±	0.0130745	0.119849	±	0.0607411	0.145998	±	0.0779915	0.113312	±	0.0490655	0.132924	±	0.0150971	0.119849	±	0.0593173	0.115491	±	0.0247496	0.102417	±	0.0322474	0.106775	±	0.00998578	0.0675514	±	0.0150971	0.102417	±	0.0308937	0.0610141	±
OTU112	Proteobacteria	Betaproteobacteria	Burkholderiales	Comamonadaceae	Comamonadaceae_unclassified	0.176505	±	0.0727955	0.152535	±	0.029478	0.132924	±	0.0661306	0.174326	±	0.0555985	0.106775	±	0.0188714	0.108954	±	0.022958	0.084984	±	0.0196117	0.0915212	±	0.0345918	0.0828049	±	0.0247496	0.0719095	±	0.0261489	0.0653723	±	0.0339684	0.056656	±	0.0335465	0.0784468	±	0.00653723	0.0871631	±	0.0360043	0.0501188	±
OTU140	Actinobacteria	Actinobacteria	Solirubrobacterales	Solirubrobacterales_unclassified	Solirubrobacterales_unclassified	0.0130745	±	0.0172959	0.0174326	±	0.0188714	0.00435815	±	0.00377427	0.0130745	±	0.00653723	0.00217908	±	0.00377427	0.0174326	±	0.0199716	0.0108954	±	0.00998578	0.0392234	±	0.0284951	0.0697304	±	0.0335465	0.0893421	±	0.0705092	0.152535	±	0.111197	0.11767	±	0.101485	0.0719095	±	0.0457606	0.143819	±	0.0345918	0.0980584	±
OTU102	Bacteroidetes	Sphingobacteriia	Sphingobacteriales	Saprospiraceae	Saprospiraceae_unclassified	0.0806258	±	0.00998578	0.0392234	±	0.0284951	0.0522978	±	0.0172959	0.0501188	±	0.0199716	0.111133	±	0.0397644	0.172147	±	0.0822583	0.111133	±	0.0736708	0.0871631	±	0.0329033	0.0697304	±	0.0150971	0.169968	±	0.0770728	0.130745	±	0.0299573	0.152535	±	0.0788091	0.104596	±	0.0736708	0.0937003	±	0.0383047	0.0915212	±
OTU202	Bacteroidetes	Sphingobacteriia	Sphingobacteriales	Chitinophagaceae	Niastella	0.0479397	±	0.0329033	0.0435815	±	0.0272167	0.0174326	±	0.0188714	0.0174326	±	0.0136083	0.115491	±	0.0563619	0.132924	±	0.0164517	0.183042	±	0.0558541	0.122028	±	0.0499289	0.204833	±	0.105882	0.106775	±	0.0490655	0.14164	±	0.0868082	0.108954	±	0.058956	0.0631932	±	0.045916	0.0980584	±	0.0172959	0.0915212	±
OTU91	Firmicutes	Bacilli	Bacillales	Bacillaceae_1	Bacillus	0.0392234	±	0.0113228	0.0588351	±	0.0196117	0.0544769	±	0.022958	0.0522978	±	0.0235703	0.122028	±	0.0308937	0.180863	±	0.0308937	0.183042	±	0.068874	0.156894	±	0.0989262	0.207012	±	0.15816	0.0784468	±	0.0510574	0.0828049	±	0.0164517	0.128566	±	0.103432	0.0631932	±	0.044498	0.139461	±	0.0699005	0.143819	±
OTU151	Bacteroidetes	Cytophagia	Cytophagales	Cytophagaceae	Dyadobacter	0.0871631	±	0.0766093	0.0239698	±	0.0199716	0.0130745	±	0.0172959	0.0174326	±	0.0247496	0.0392234	±	0.0457606	0.0174326	±	0.0164517	0.0108954	±	0.00998578	0.0305071	±	0.0329033	0.00871631	±	0.00998578	0.0130745	±	0.00653723	0.00653723	±	0.00653723	0.0457606	±	0.0510574	0.185222	±	0.132423	0.108954	±	0.115162	0.0217908	±
OTU265	Planctomycetes	Planctomycetia	Planctomycetales	Planctomycetaceae	Planctomycetaceae_unclassified	0.0370443	±	0.0210143	0.0828049	±	0.0377427	0.056656	±	0.0136083	0.0762677	±	0.0308937	0.111133	±	0.0457606	0.14164	±	0.0752018	0.0893421	±	0.0188714	0.191759	±	0.107881	0.132924	±	0.0272167	0.0806258	±	0.0644948	0.104596	±	0.0679369	0.176505	±	0.0326861	0.115491	±	0.0667737	0.0544769	±	0.0210143	0.0871631	±
OTU170	Actinobacteria	Actinobacteria	Actinomycetales	Actinomycetales_unclassified	Actinomycetales_unclassified	0.100238	±	0.0490655	0.0915212	±	0.0196117	0.106775	±	0.043527	0.100238	±	0.0308937	0.102417	±	0.0377427	0.0980584	±	0.0510574	0.130745	±	0.0457606	0.113312	±	0.0264199	0.0958794	±	0.0264199	0.084984	±	0.0196117	0.113312	±	0.0360043	0.11767	±	0.0235703	0.104596	±	0.0643842	0.0937003	±	0.0360043	0.0828049	±
OTU2130	Actinobacteria	Actinobacteria	Actinomycetales	Nocardioidaceae	Nocardioides	0.370443	±	0.222394	0.329041	±	0.108276	0.374801	±	0.190517	0.289817	±	0.121658	0.0980584	±	0.0299573	0.100238	±	0.0399431	0.108954	±	0.0136083	0.084984	±	0.0172959	0.0893421	±	0.0164517	0.0501188	±	0.0329033	0.0435815	±	0.00998578	0.0305071	±	0.0150971	0.0392234	±	0.0226456	0.0544769	±	0.022958	0.0348652	±
OTU104	Bacteroidetes	Flavobacteriia	Flavobacteriales	Flavobacteriaceae	Chryseobacterium	0.0174326	±	0.0247496	0	±	0	0.00435815	±	0.00754854	0.00217908	±	0.00377427	0.00217908	±	0.00377427	0.00871631	±	0.00998578	0.0174326	±	0.0247496	0.0130745	±	0.0172959	0.00653723	±	0.0113228	0.00435815	±	0.00754854	0.00435815	±	0.00754854	0.0370443	±	0.0360043	0.616679	±	1.04555	1.14619	±	1.92322	0.00435815	±
OTU101	Nitrospirae	Nitrospira	Nitrospirales	Nitrospiraceae	Nitrospira	0.084984	±	0.0457606	0.0980584	±	0.0172959	0.0937003	±	0.0360043	0.0958794	±	0.0272167	0.132924	±	0.0499289	0.111133	±	0.0397644	0.11767	±	0.0535095	0.122028	±	0.0264199	0.124207	±	0.0299573	0.126386	±	0.00998578	0.11767	±	0.0299573	0.132924	±	0.00998578	0.0806258	±	0.0136083	0.0828049	±	0.0383047	0.11767	±
OTU158	Proteobacteria	Betaproteobacteria	Betaproteobacteria_unclassified	Betaproteobacteria_unclassified	Betaproteobacteria_unclassified	0.0392234	±	0.0226456	0.0980584	±	0.0226456	0.0937003	±	0.0481867	0.0631932	±	0.00754854	0.084984	±	0.0471406	0.0719095	±	0.0392234	0.100238	±	0.0887556	0.0784468	±	0.0363978	0.0915212	±	0.0682507	0.0958794	±	0.0371723	0.104596	±	0.0518877	0.113312	±	0.0481867	0.119849	±	0.0210143	0.0915212	±	0.0226456	0.106775	±
OTU149	Planctomycetes	Planctomycetia	Planctomycetales	Planctomycetaceae	Planctomycetaceae_unclassified	0.0937003	±	0.0360043	0.0828049	±	0.0199716	0.0588351	±	0.0452913	0.0784468	±	0.040825	0.0893421	±	0.0210143	0.113312	±	0.029478	0.0871631	±	0.0371723	0.130745	±	0.0566141	0.0937003	±	0.0490655	0.104596	±	0.0326861	0.102417	±	0.0264199	0.0871631	±	0.0150971	0.0653723	±	0.0284951	0.0675514	±	0.0164517	0.115491	±
OTU258	Chloroflexi	Anaerolineae	Anaerolineales	Anaerolineaceae	Anaerolineaceae_unclassified	0.0435815	±	0.0247496	0.0588351	±	0.0113228	0.108954	±	0.0247496	0.0631932	±	0.0528398	0.111133	±	0.0569902	0.104596	±	0.040825	0.0719095	±	0.0663456	0.119849	±	0.0524339	0.106775	±	0.046379	0.108954	±	0.0548245	0.148177	±	0.0906611	0.126386	±	0.0528398	0.0784468	±	0.0428675	0.0915212	±	0.0196117	0.0501188	±
OTU189	Gemmatimonadetes	Gemmatimonadetes	Gemmatimonadales	Gemmatimonadaceae	Gemmatimonas	0.252773	±	0.0607411	0.209191	±	0.0915212	0.261489	±	0.084984	0.198296	±	0.043527	0.128566	±	0.0939028	0.0980584	±	0.0518877	0.0544769	±	0.045916	0.056656	±	0.00998578	0.0588351	±	0.0569902	0.0937003	±	0.046379	0.0479397	±	0.0301942	0.0457606	±	0.0172959	0.0631932	±	0.043527	0.0871631	±	0.0394045	0.0326861	±
OTU190	Proteobacteria	Gammaproteobacteria	Xanthomonadales	Xanthomonadaceae	Xanthomonadaceae_unclassified	0.056656	±	0.00377427	0.056656	±	0.0383047	0.0631932	±	0.0335465	0.0653723	±	0.0172959	0.126386	±	0.0199716	0.100238	±	0.00998578	0.111133	±	0.0510574	0.0958794	±	0.0360043	0.11767	±	0.0566141	0.0915212	±	0.0226456	0.119849	±	0.0322474	0.111133	±	0.00653723	0.132924	±	0.0490655	0.100238	±	0.0377427	0.106775	±
OTU363	Actinobacteria	Actinobacteria	Actinomycetales	Geodermatophilaceae	Blastococcus	0.139461	±	0.0188714	0.143819	±	0.0428675	0.156894	±	0.0457606	0.148177	±	0.0548245	0.100238	±	0.0472915	0.115491	±	0.0136083	0.152535	±	0.0507776	0.124207	±	0.0196117	0.0631932	±	0.0136083	0.0697304	±	0.0164517	0.0522978	±	0.0363978	0.0806258	±	0.0494991	0.0522978	±	0.0284951	0.0806258	±	0.00754854	0.0828049	±
OTU380	Proteobacteria	Betaproteobacteria	Burkholderiales	Burkholderiales_incertae_sedis	Aquabacterium	0.028328	±	0.0264199	0.0348652	±	0.0150971	0.0239698	±	0.0164517	0.0348652	±	0.0247496	0.126386	±	0.0399431	0.0980584	±	0.0457606	0.0828049	±	0.0335465	0.0871631	±	0.029478	0.183042	±	0.160529	0.0719095	±	0.0345918	0.0893421	±	0.0360043	0.0719095	±	0.0428675	0.0980584	±	0.049355	0.0937003	±	0.0272167	0.124207	±
OTU51	Bacteria_unclassified	Bacteria_unclassified	Bacteria_unclassified	Bacteria_unclassified	Bacteria_unclassified	0.00871631	±	0.00754854	0.0261489	±	0.0284951	0.0108954	±	0.00998578	0.00871631	±	0.0150971	0.0326861	±	0.0284951	0.0217908	±	0.0322474	0.00435815	±	0.00754854	0.0261489	±	0.0284951	0.248415	±	0.113417	0.174326	±	0.0717112	0.180863	±	0.103432	0.156894	±	0.1633	0.150356	±	0.0742487	0.130745	±	0.100639	0.18958	±
OTU126	Bacteria_unclassified	Bacteria_unclassified	Bacteria_unclassified	Bacteria_unclassified	Bacteria_unclassified	0.119849	±	0.0264199	0.106775	±	0.0399431	0.135103	±	0.029478	0.11767	±	0.0392234	0.104596	±	0.0976217	0.0915212	±	0.0630428	0.0762677	±	0.0308937	0.113312	±	0.0532426	0.115491	±	0.0377427	0.143819	±	0.0518877	0.0762677	±	0.0272167	0.191759	±	0.0817372	0.0828049	±	0.0322474	0.0392234	±	0.0284951	0.0479397	±
OTU240	Proteobacteria	Gammaproteobacteria	Xanthomonadales	Xanthomonadaceae	Lysobacter	0.228803	±	0.0284951	0.25931	±	0.0743445	0.313787	±	0.101905	0.246236	±	0.103844	0.0719095	±	0.0457606	0.0828049	±	0.00754854	0.0544769	±	0.0490655	0.0675514	±	0.0329033	0.0305071	±	0.0210143	0.084984	±	0.0339684	0.0501188	±	0.029478	0.0610141	±	0.0322474	0.0457606	±	0.0196117	0.0414025	±	0.0360043	0.0348652	±
OTU4678	Acidobacteria	Acidobacteria_Gp16	Gp16	Gp16_unclassified	Gp16_unclassified	0.108954	±	0.0425339	0.122028	±	0.0481867	0.148177	±	0.0548245	0.0958794	±	0.0394045	0.0893421	±	0.0394045	0.122028	±	0.0247496	0.084984	±	0.0326861	0.0958794	±	0.0322474	0.0828049	±	0.0164517	0.0893421	±	0.0164517	0.0828049	±	0.0150971	0.0871631	±	0.045916	0.0631932	±	0.0164517	0.0588351	±	0.0581042	0.056656	±
OTU335	Proteobacteria	Betaproteobacteria	Burkholderiales	Oxalobacteraceae	Noviherbaspirillum	0.150356	±	0.0510574	0.226624	±	0.00998578	0.161252	±	0.0607411	0.21137	±	0.0494991	0.207012	±	0.0779915	0.207012	±	0.104255	0.0937003	±	0.00998578	0.145998	±	0.022958	0.056656	±	0.0264199	0.0435815	±	0.0164517	0.0348652	±	0.0199716	0.0108954	±	0.0136083	0.0305071	±	0.0264199	0.0631932	±	0.0210143	0.0392234	±
OTU132	Bacteroidetes	Sphingobacteriia	Sphingobacteriales	Sphingobacteriales_unclassified	Sphingobacteriales_unclassified	0.0653723	±	0.0130745	0.0305071	±	0.00998578	0.0610141	±	0.0272167	0.0501188	±	0.0150971	0.084984	±	0.0643842	0.0740886	±	0.0164517	0.0631932	±	0.0399431	0.0719095	±	0	0.119849	±	0.0136083	0.0697304	±	0.0472915	0.0915212	±	0.0235703	0.0937003	±	0.0272167	0.11767	±	0.0428675	0.130745	±	0.0339684	0.0915212	±
OTU84	Bacteroidetes	Cytophagia	Cytophagales	Ohtaekwangia	Ohtaekwangia_unclassified	0.0522978	±	0.0113228	0.0610141	±	0.0272167	0.0544769	±	0.0199716	0.0544769	±	0.0272167	0.0871631	±	0.0528398	0.0610141	±	0.0247496	0.0937003	±	0.00998578	0.0762677	±	0.0399431	0.156894	±	0.0471406	0.128566	±	0.0593173	0.169968	±	0.0510574	0.124207	±	0.0226456	0.0871631	±	0.0136083	0.0610141	±	0.0308937	0.0697304	±
OTU78	Chloroflexi	Thermomicrobia	Sphaerobacterales	Sphaerobacteraceae	Sphaerobacteraceae_unclassified	0.139461	±	0.0617875	0.169968	±	0.0719095	0.174326	±	0.0329033	0.126386	±	0.0164517	0.100238	±	0.0308937	0.126386	±	0.0360043	0.115491	±	0.0199716	0.139461	±	0.00754854	0.100238	±	0.0210143	0.0740886	±	0.0301942	0.0871631	±	0.0699005	0.0871631	±	0.022958	0.0392234	±	0	0.0697304	±	0.0247496	0.0675514	±
OTU611	Proteobacteria	Alphaproteobacteria	Rhodospirillales	Reyranella	Reyranella_unclassified	0.0588351	±	0.0428675	0.0435815	±	0.0264199	0.0784468	±	0.0261489	0.0697304	±	0.00998578	0.0762677	±	0.0210143	0.0719095	±	0.0113228	0.0937003	±	0.0136083	0.0675514	±	0.0210143	0.0980584	±	0.0196117	0.0806258	±	0.00998578	0.0937003	±	0.0264199	0.0740886	±	0.0322474	0.0675514	±	0.00998578	0.102417	±	0.0528398	0.126386	±
OTU143	Planctomycetes	Planctomycetia	Planctomycetales	Planctomycetaceae	Planctomicrobium	0.0631932	±	0.0377427	0.0719095	±	0.00653723	0.056656	±	0.0264199	0.0937003	±	0.0308937	0.104596	±	0.0284951	0.115491	±	0.0264199	0.0697304	±	0.0585924	0.0937003	±	0.0528398	0.126386	±	0.0272167	0.102417	±	0.0164517	0.115491	±	0.022958	0.137282	±	0.0742487	0.0784468	±	0.00653723	0.0915212	±	0.0226456	0.0871631	±
OTU107	Acidobacteria	Acidobacteria_Gp6	Gp6	Gp6_unclassified	Gp6_unclassified	0.0675514	±	0.0308937	0.0980584	±	0.0172959	0.106775	±	0.0383047	0.124207	±	0.0299573	0.0784468	±	0.0518877	0.11767	±	0.0345918	0.0740886	±	0.0383047	0.122028	±	0.0607411	0.115491	±	0.0774416	0.139461	±	0.043527	0.0631932	±	0.022958	0.108954	±	0.0164517	0.0610141	±	0.00998578	0.122028	±	0.0555985	0.0479397	±
OTU119	Proteobacteria	Gammaproteobacteria	Pseudomonadales	Pseudomonadaceae	Azotobacter	0.0653723	±	0.0345918	0.305071	±	0.27676	0.222266	±	0.143373	0.028328	±	0.00998578	0.0697304	±	0.0585924	0.185222	±	0.0788091	0.202654	±	0.0942813	0.0675514	±	0.0680416	0.115491	±	0.166197	0.115491	±	0.0817372	0.028328	±	0.0199716	0.0588351	±	0.0457606	0.056656	±	0.0329033	0.0239698	±	0.0188714	0.250594	±
OTU665	Planctomycetes	Planctomycetia	Planctomycetales	Planctomycetaceae	Gemmata	0.0719095	±	0	0.102417	±	0.0308937	0.0653723	±	0.0326861	0.0479397	±	0.0199716	0.0806258	±	0.0164517	0.0653723	±	0.0226456	0.0980584	±	0.0397644	0.0697304	±	0.00754854	0.0740886	±	0.0322474	0.0980584	±	0.0284951	0.100238	±	0.0301942	0.122028	±	0.046379	0.0806258	±	0.044498	0.0653723	±	0.0113228	0.0675514	±
OTU153	Proteobacteria	Alphaproteobacteria	Rhodospirillales	Rhodospirillaceae	Rhodospirillaceae_unclassified	0.104596	±	0.0663456	0.124207	±	0.0284951	0.0893421	±	0.0420285	0.122028	±	0.0210143	0.113312	±	0.0210143	0.104596	±	0.0172959	0.0893421	±	0.0360043	0.084984	±	0.0196117	0.0588351	±	0.0172959	0.0937003	±	0.0272167	0.0610141	±	0.0136083	0.0871631	±	0.0335465	0.0958794	±	0.0136083	0.0719095	±	0.0363978	0.0501188	±
OTU215	Firmicutes	Bacilli	Bacillales	Alicyclobacillaceae	Tumebacillus	0.0239698	±	0.0188714	0.00435815	±	0.00377427	0.0108954	±	0.00377427	0.0261489	±	0.00653723	0.128566	±	0.140867	0.156894	±	0.122126	0.305071	±	0.254225	0.0196117	±	0.0235703	0.143819	±	0.158654	0.0937003	±	0.140259	0.220087	±	0.315711	0.0261489	±	0.0235703	0.0348652	±	0.0548245	0.0653723	±	0.0795288	0.0980584	±
OTU137	Proteobacteria	Alphaproteobacteria	Rhodobacterales	Rhodobacteraceae	Rubellimicrobium	0.135103	±	0.0329033	0.145998	±	0.0532426	0.137282	±	0.0363978	0.128566	±	0.0360043	0.0697304	±	0.0199716	0.0544769	±	0.0150971	0.128566	±	0.0499289	0.119849	±	0.045916	0.0740886	±	0.0528398	0.0631932	±	0.0247496	0.0501188	±	0.00754854	0.0522978	±	0.00653723	0.0435815	±	0.045916	0.0980584	±	0	0.0631932	±
OTU338	Proteobacteria	Alphaproteobacteria	Sphingomonadales	Erythrobacteraceae	Erythrobacteraceae_unclassified	0.119849	±	0.0743445	0.102417	±	0.0308937	0.104596	±	0.0226456	0.128566	±	0.0150971	0.111133	±	0.0196117	0.0958794	±	0.022958	0.0719095	±	0.0235703	0.108954	±	0.0425339	0.100238	±	0.0723046	0.0828049	±	0.0329033	0.102417	±	0.0555985	0.0871631	±	0.0329033	0.0806258	±	0.0264199	0.0871631	±	0.0308937	0.0871631	±
OTU1543	Proteobacteria	Alphaproteobacteria	Sphingomonadales	Sphingomonadaceae	Sphingomonadaceae_unclassified	0.0610141	±	0.0188714	0.0893421	±	0.045916	0.0937003	±	0.0301942	0.0828049	±	0.00998578	0.113312	±	0.0628164	0.0697304	±	0.046379	0.0828049	±	0.0335465	0.0544769	±	0.0136083	0.11767	±	0.0392234	0.0675514	±	0.0264199	0.0370443	±	0.00998578	0.0610141	±	0.0136083	0.0958794	±	0.0490655	0.0719095	±	0.0130745	0.0893421	±
OTU208	Actinobacteria	Actinobacteria	Actinomycetales	Nocardiaceae	Nocardia	0.0501188	±	0.00998578	0.0348652	±	0.0150971	0.0435815	±	0.0264199	0.156894	±	0.195243	0.0740886	±	0.0329033	0.0980584	±	0.0172959	0.056656	±	0.00998578	0.100238	±	0.0692864	0.0762677	±	0.0329033	0.0675514	±	0.0371723	0.0610141	±	0.029478	0.0501188	±	0.0264199	0.0675514	±	0.0272167	0.0457606	±	0.0196117	0.0653723	±
OTU217	Proteobacteria	Gammaproteobacteria	Xanthomonadales	Xanthomonadaceae	Pseudoxanthomonas	0.0196117	±	0.0284951	0.0130745	±	0.0172959	0.00653723	±	0.00653723	0.00217908	±	0.00377427	0.126386	±	0.043527	0.0762677	±	0.0827762	0.113312	±	0.0210143	0.106775	±	0.0264199	0.0871631	±	0.0822583	0.0479397	±	0.0661306	0.0435815	±	0.0322474	0.0958794	±	0.0925274	0.21137	±	0.110619	0.11767	±	0.0915212	0.0697304	±
OTU5562	Proteobacteria	Betaproteobacteria	Betaproteobacteria_unclassified	Betaproteobacteria_unclassified	Betaproteobacteria_unclassified	0.0806258	±	0.0164517	0.113312	±	0.0264199	0.0762677	±	0.00754854	0.0937003	±	0.0264199	0.0784468	±	0.0623612	0.0958794	±	0.0164517	0.0522978	±	0.0345918	0.0610141	±	0.0164517	0.100238	±	0.043527	0.126386	±	0.00754854	0.0806258	±	0.029478	0.143819	±	0.0299573	0.0958794	±	0.029478	0.0806258	±	0.0507776	0.0740886	±
OTU168	Proteobacteria	Alphaproteobacteria	Rhodospirillales	Rhodospirillaceae	Rhodospirillaceae_unclassified	0.0784468	±	0.0226456	0.0980584	±	0.040825	0.056656	±	0.00998578	0.0806258	±	0.0383047	0.115491	±	0.043527	0.084984	±	0.0428675	0.0653723	±	0.00653723	0.102417	±	0.0272167	0.132924	±	0.0360043	0.0937003	±	0.0322474	0.0937003	±	0.0136083	0.0937003	±	0.0188714	0.0828049	±	0.0420285	0.0588351	±	0.0284951	0.0915212	±
OTU536	Proteobacteria	Alphaproteobacteria	Rhizobiales	Methylobacteriaceae	Microvirga	0.0958794	±	0.0399431	0.0828049	±	0.0481867	0.102417	±	0.0329033	0.0915212	±	0.0363978	0.0653723	±	0.0261489	0.100238	±	0.00998578	0.0653723	±	0.0172959	0.0784468	±	0.0196117	0.0719095	±	0	0.0828049	±	0.00998578	0.028328	±	0.0164517	0.0501188	±	0.0150971	0.0784468	±	0.0235703	0.167789	±	0.0481867	0.113312	±
OTU130	Proteobacteria	Betaproteobacteria	Betaproteobacteria_unclassified	Betaproteobacteria_unclassified	Betaproteobacteria_unclassified	0.0370443	±	0.00998578	0.0152535	±	0.00754854	0.0348652	±	0.0136083	0.0414025	±	0.00754854	0.0414025	±	0.0425339	0.0653723	±	0.0397644	0.0653723	±	0.049355	0.0370443	±	0.00998578	0.102417	±	0.0563619	0.0937003	±	0.0563619	0.191759	±	0.130799	0.14164	±	0.0788091	0.111133	±	0.0299573	0.104596	±	0.0569902	0.106775	±
OTU284	Verrucomicrobia	Verrucomicrobiae	Verrucomicrobiales	Verrucomicrobiaceae	Roseimicrobium	0.0108954	±	0.00377427	0.028328	±	0.00998578	0.0261489	±	4.24919e-18	0.0217908	±	0.0164517	0.00871631	±	0.00377427	0.028328	±	0.0272167	0.0326861	±	0.0284951	0.0239698	±	0.0150971	0.0435815	±	0.0247496	0.0501188	±	0.00998578	0.0370443	±	0.0210143	0.104596	±	0.0196117	0.143819	±	0.0510574	0.0610141	±	0.0394045	0.0740886	±
OTU331	Proteobacteria	Alphaproteobacteria	Sphingomonadales	Sphingomonadaceae	Sphingopyxis	0.00435815	±	0.00754854	0.0130745	±	0.0172959	0.00871631	±	0.00754854	0.00217908	±	0.00377427	0.00653723	±	0.00653723	0.00653723	±	0.0113228	0.00871631	±	0.00998578	0.00435815	±	0.00754854	0.0130745	±	0.0113228	0.0217908	±	0.0136083	0.00217908	±	0.00377427	0.0414025	±	0.0607411	0.0414025	±	0.0335465	0.0130745	±	0.00653723	0.0217908	±
OTU128	Proteobacteria	Deltaproteobacteria	Myxococcales	Cystobacteraceae	Anaeromyxobacter	0.150356	±	0.0522978	0.185222	±	0.0136083	0.156894	±	0.0284951	0.174326	±	0.029478	0.084984	±	0.0235703	0.113312	±	0.0377427	0.0544769	±	0.00377427	0.0915212	±	0.0235703	0.0544769	±	0.0210143	0.150356	±	0.0299573	0.0828049	±	0.00754854	0.0740886	±	0.0247496	0.0457606	±	0.0130745	0.0740886	±	0.0360043	0.0697304	±
OTU2610	Proteobacteria	Betaproteobacteria	Burkholderiales	Comamonadaceae	Ramlibacter	0.0479397	±	0.0264199	0.0653723	±	0.0299573	0.0631932	±	0.0164517	0.0610141	±	0.0264199	0.0697304	±	0.0164517	0.0653723	±	0.0345918	0.0457606	±	0.0196117	0.0435815	±	0.0383047	0.0588351	±	0.00653723	0.0610141	±	0.0377427	0.0610141	±	0.0136083	0.0392234	±	0.0130745	0.122028	±	0.0868082	0.102417	±	0.0360043	0.0435815	±
OTU8631	Proteobacteria	Alphaproteobacteria	Rhizobiales	Rhizobiales_unclassified	Rhizobiales_unclassified	0.156894	±	0.0742487	0.100238	±	0.00998578	0.0828049	±	0.0507776	0.100238	±	0.0136083	0.0871631	±	0.0272167	0.0915212	±	0.0284951	0.056656	±	0.0335465	0.0675514	±	0.0371723	0.0501188	±	0.029478	0.124207	±	0.0569902	0.0784468	±	0.0172959	0.102417	±	0.0264199	0.0762677	±	0.0377427	0.0631932	±	0.0322474	0.0588351	±
OTU124	Verrucomicrobia	Spartobacteria	Spartobacteria_unclassified	Spartobacteria_unclassified	Spartobacteria_unclassified	0.119849	±	0.0399431	0.122028	±	0.0563619	0.0893421	±	0.0628164	0.0719095	±	0.0363978	0.130745	±	0.0522978	0.137282	±	0.0235703	0.108954	±	0.0472915	0.0719095	±	0.0284951	0.128566	±	0.0308937	0.106775	±	0.0743445	0.084984	±	0.0457606	0.0937003	±	0.0199716	0.0697304	±	0.0329033	0.0610141	±	0.0136083	0.0653723	±
OTU268	Proteobacteria	Alphaproteobacteria	Rhizobiales	Rhodobiaceae	Rhodobiaceae_unclassified	0.106775	±	0.043527	0.0893421	±	0.0210143	0.130745	±	0.0284951	0.113312	±	0.0199716	0.0893421	±	0.0322474	0.126386	±	0.0136083	0.102417	±	0.0164517	0.0937003	±	0.0136083	0.104596	±	0.0172959	0.0544769	±	0.043527	0.0719095	±	0.0428675	0.0806258	±	0.022958	0.0348652	±	0.00377427	0.084984	±	0.0588351	0.0544769	±
OTU193	Verrucomicrobia	Subdivision3	Subdivision3_unclassified	Subdivision3_unclassified	Subdivision3_unclassified	0.0435815	±	0.0136083	0.0697304	±	0.0322474	0.0762677	±	0.0420285	0.084984	±	0.0130745	0.0239698	±	0.00998578	0.0370443	±	0.00754854	0.0217908	±	0.00998578	0.0631932	±	0.0544333	0.0697304	±	0.0555985	0.132924	±	0.029478	0.11767	±	0.0284951	0.0740886	±	0.0507776	0.0806258	±	0.0607411	0.0631932	±	0.022958	0.0653723	±
OTU123	Chloroflexi	Thermomicrobia	Sphaerobacterales	Sphaerobacteraceae	Sphaerobacteraceae_unclassified	0.150356	±	0.0989262	0.0893421	±	0.0329033	0.174326	±	0.0264199	0.104596	±	0.0261489	0.119849	±	0.0593173	0.113312	±	0.0585924	0.135103	±	0.0322474	0.128566	±	0.0563619	0.0501188	±	0.0164517	0.0435815	±	0.0247496	0.0893421	±	0.043527	0.0544769	±	0.0210143	0.0370443	±	0.0272167	0.0544769	±	0.022958	0.0675514	±
OTU122	Gemmatimonadetes	Gemmatimonadetes	Gemmatimonadales	Gemmatimonadaceae	Gemmatimonas	0.124207	±	0.0284951	0.119849	±	0.0199716	0.130745	±	0.0345918	0.111133	±	0.0727955	0.102417	±	0.046379	0.0762677	±	0.0377427	0.0697304	±	0.0371723	0.0806258	±	0.00754854	0.0893421	±	0.0641626	0.0784468	±	0.0226456	0.0348652	±	0.00377427	0.0544769	±	0.0150971	0.0435815	±	0.0329033	0.0610141	±	0.029478	0.0631932	±
OTU281	Firmicutes	Bacilli	Bacillales	Paenibacillaceae_1	Paenibacillus	0.0958794	±	0.0188714	0.0784468	±	0.040825	0.0937003	±	0.0494991	0.0893421	±	0.0164517	0.0784468	±	0.0172959	0.135103	±	0.0247496	0.0806258	±	0.0335465	0.0937003	±	0.00998578	0.11767	±	0.0518877	0.100238	±	0.0555985	0.0958794	±	0.0272167	0.0697304	±	0.0136083	0.056656	±	0.0164517	0.0631932	±	0.0164517	0.0697304	±
OTU108	Bacteria_unclassified	Bacteria_unclassified	Bacteria_unclassified	Bacteria_unclassified	Bacteria_unclassified	0.0893421	±	0.0335465	0.0697304	±	0.0264199	0.0653723	±	0.0196117	0.0958794	±	0.0247496	0.104596	±	0.0457606	0.108954	±	0.043527	0.084984	±	0.0284951	0.104596	±	0.0235703	0.0762677	±	0.00998578	0.0915212	±	0.0130745	0.0762677	±	0.0383047	0.115491	±	0.058956	0.100238	±	0.0555985	0.0915212	±	0.0299573	0.0719095	±
OTU238	Proteobacteria	Gammaproteobacteria	Xanthomonadales	Xanthomonadales_unclassified	Xanthomonadales_unclassified	0.0522978	±	0.0428675	0.0435815	±	0.0188714	0.0457606	±	0.0397644	0.0980584	±	0.0172959	0.0501188	±	0.0394045	0.0675514	±	0.0360043	0.0261489	±	0.0196117	0.0435815	±	0.0360043	0.102417	±	0.0247496	0.132924	±	0.0360043	0.106775	±	0.0686668	0.145998	±	0.0705092	0.0631932	±	0.0360043	0.0675514	±	0.045916	0.0937003	±
OTU302	Chloroflexi	Thermomicrobia	Sphaerobacterales	Sphaerobacteraceae	Sphaerobacteraceae_unclassified	0.0828049	±	0.00377427	0.0653723	±	0.00653723	0.0740886	±	0.0272167	0.0719095	±	0.0299573	0.139461	±	0.0472915	0.0806258	±	0.00998578	0.0893421	±	0.0136083	0.126386	±	0.0264199	0.113312	±	0.0774416	0.0435815	±	0.0188714	0.104596	±	0.0471406	0.0653723	±	0.0172959	0.0740886	±	0.0164517	0.0414025	±	0.044498	0.0719095	±
OTU212	Bacteria_unclassified	Bacteria_unclassified	Bacteria_unclassified	Bacteria_unclassified	Bacteria_unclassified	0.0631932	±	0.0264199	0.0675514	±	0.00998578	0.0806258	±	0.0272167	0.119849	±	0.0593173	0.0980584	±	0.0130745	0.0719095	±	0.0471406	0.0784468	±	0.040825	0.102417	±	0.0322474	0.0871631	±	0.0247496	0.0784468	±	0.0397644	0.0937003	±	0.022958	0.0806258	±	0.0264199	0.0762677	±	0.0394045	0.0719095	±	0.0284951	0.0980584	±
OTU7387	Acidobacteria	Acidobacteria_Gp6	Gp6	Gp6_unclassified	Gp6_unclassified	0.132924	±	0.0360043	0.0697304	±	0.00998578	0.102417	±	0.058956	0.130745	±	0.0363978	0.0697304	±	0.0329033	0.104596	±	0.0397644	0.0740886	±	0.022958	0.084984	±	0.0518877	0.0740886	±	0.0335465	0.102417	±	0.0686668	0.100238	±	0.0247496	0.135103	±	0.0322474	0.0544769	±	0.0210143	0.0893421	±	0.043527	0.0719095	±
OTU394	Bacteria_unclassified	Bacteria_unclassified	Bacteria_unclassified	Bacteria_unclassified	Bacteria_unclassified	0.130745	±	0.0130745	0.106775	±	0.0164517	0.0871631	±	0.0329033	0.0653723	±	0.0235703	0.100238	±	0.0199716	0.056656	±	0.00998578	0.0893421	±	0.0210143	0.111133	±	0.0130745	0.084984	±	0.0599147	0.0806258	±	0.0779915	0.056656	±	0.041517	0.106775	±	0.0383047	0.0675514	±	0.022958	0.0435815	±	0.0360043	0.056656	±
OTU324	Acidobacteria	Acidobacteria_Gp6	Gp6	Gp6_unclassified	Gp6_unclassified	0.104596	±	0.0235703	0.0588351	±	0.00653723	0.0457606	±	0.0235703	0.102417	±	0.029478	0.0719095	±	0.00653723	0.0740886	±	0.0136083	0.084984	±	0.0339684	0.0871631	±	0.0371723	0.0588351	±	0.00653723	0.100238	±	0.0264199	0.0697304	±	0.0425339	0.084984	±	0.0113228	0.0544769	±	0.0188714	0.0588351	±	0.0345918	0.056656	±
OTU259	Proteobacteria	Alphaproteobacteria	Rhizobiales	Rhizobiales_incertae_sedis	Alsobacter	0.0915212	±	0.0326861	0.148177	±	0.029478	0.115491	±	0.0264199	0.0915212	±	0.0345918	0.0915212	±	0.0397644	0.0784468	±	0.0284951	0.0501188	±	0.0188714	0.100238	±	0.0308937	0.0697304	±	0.0247496	0.0610141	±	0.0150971	0.0501188	±	0.0164517	0.056656	±	0.0301942	0.0435815	±	0.0150971	0.0719095	±	0.0345918	0.0675514	±
OTU171	Acidobacteria	Acidobacteria_Gp6	Gp6	Gp6_unclassified	Gp6_unclassified	0.0740886	±	0.022958	0.0675514	±	0.0199716	0.0653723	±	0.0196117	0.0806258	±	0.022958	0.115491	±	0.0136083	0.102417	±	0.0264199	0.104596	±	0.0691835	0.0588351	±	0.0226456	0.130745	±	0.0299573	0.0915212	±	0.0226456	0.056656	±	0.0199716	0.102417	±	0.0472915	0.0937003	±	0.0247496	0.100238	±	0.0603883	0.0610141	±
OTU97	Bacteroidetes	Sphingobacteriia	Sphingobacteriales	Chitinophagaceae	Ferruginibacter	0.226624	±	0.0264199	0.196117	±	0.0623612	0.16561	±	0.0425339	0.228803	±	0.0345918	0.0806258	±	0.0490655	0.0719095	±	0.0261489	0.0697304	±	0.0394045	0.0828049	±	0.0301942	0.028328	±	0.0199716	0.0784468	±	0.0226456	0.0697304	±	0.0472915	0.0610141	±	0.0136083	0.0435815	±	0.0247496	0.0740886	±	0.0555985	0.056656	±
OTU2937	Acidobacteria	Acidobacteria_Gp6	Gp6	Gp6_unclassified	Gp6_unclassified	0.104596	±	0.0172959	0.106775	±	0.00377427	0.119849	±	0.0555985	0.119849	±	0.0425339	0.0697304	±	0.0210143	0.0958794	±	0.0199716	0.0653723	±	0.0284951	0.115491	±	0.0593173	0.0958794	±	0.0499289	0.0915212	±	0.0196117	0.0414025	±	0.0210143	0.104596	±	0.0284951	0.0719095	±	0.00653723	0.0653723	±	0.0345918	0.0631932	±
OTU224	Verrucomicrobia	Subdivision3	Subdivision3_unclassified	Subdivision3_unclassified	Subdivision3_unclassified	0.0501188	±	0.0199716	0.0348652	±	0.0322474	0.0675514	±	0.0272167	0.0675514	±	0.0308937	0.0740886	±	0.0563619	0.104596	±	0.0392234	0.084984	±	0.0339684	0.128566	±	0.0723046	0.084984	±	0.0130745	0.0740886	±	0.00754854	0.108954	±	0.0329033	0.150356	±	0.0792597	0.0610141	±	0.0264199	0.0631932	±	0.00998578	0.0828049	±
OTU1005	Proteobacteria	Alphaproteobacteria	Rhizobiales	Rhodobiaceae	Rhodobiaceae_unclassified	0.0740886	±	0.0425339	0.0828049	±	0.0360043	0.0740886	±	0.0548245	0.0653723	±	0.0284951	0.0937003	±	0.0548245	0.100238	±	0.0360043	0.0631932	±	0.0301942	0.084984	±	0.0113228	0.0435815	±	0.0308937	0.0653723	±	0.0284951	0.0653723	±	0.00653723	0.0740886	±	0.0360043	0.108954	±	0.0524339	0.0522978	±	0.0363978	0.084984	±
OTU270	Acidobacteria	Acidobacteria_Gp16	Gp16	Gp16_unclassified	Gp16_unclassified	0.132924	±	0.00998578	0.0958794	±	0.0210143	0.115491	±	0.0481867	0.0871631	±	0.029478	0.0915212	±	0.0345918	0.102417	±	0.029478	0.104596	±	0.00653723	0.0893421	±	0.0188714	0.0915212	±	0.0663456	0.0588351	±	0.0235703	0.0610141	±	0.0264199	0.0675514	±	0.029478	0.056656	±	0.00998578	0.056656	±	0.00998578	0.0828049	±
OTU275	Chloroflexi	Chloroflexia	Chloroflexia_unclassified	Chloroflexia_unclassified	Chloroflexia_unclassified	0.0348652	±	0.00377427	0.0631932	±	0.0247496	0.0828049	±	0.0199716	0.0697304	±	0.0481867	0.0479397	±	0.0272167	0.0740886	±	0.022958	0.0544769	±	0.00998578	0.0762677	±	0.0571151	0.0719095	±	0	0.056656	±	0.0188714	0.0675514	±	0.029478	0.0675514	±	0.0199716	0.056656	±	0.0544333	0.0719095	±	0.0299573	0.0653723	±
OTU10717	Bacteria_unclassified	Bacteria_unclassified	Bacteria_unclassified	Bacteria_unclassified	Bacteria_unclassified	0.0937003	±	0.00998578	0.0806258	±	0.00998578	0.111133	±	0.0558541	0.0871631	±	0.0136083	0.102417	±	0.103844	0.084984	±	0.0226456	0.0806258	±	0.0507776	0.0414025	±	0.00998578	0.0828049	±	0.0301942	0.152535	±	0.0199716	0.0915212	±	0.0623612	0.124207	±	0.122475	0.0719095	±	0.0457606	0.0522978	±	0.0339684	0.0544769	±
OTU221	Verrucomicrobia	Verrucomicrobiae	Verrucomicrobiales	Verrucomicrobiaceae	Luteolibacter	0.0435815	±	0.0532426	0.0152535	±	0.00998578	0.00653723	±	0.00653723	0.0370443	±	0.0532426	0.0784468	±	0.0284951	0.0414025	±	0.0150971	0.0828049	±	0.0360043	0.0544769	±	0.0210143	0.115491	±	0.11627	0.0305071	±	0.0150971	0.0392234	±	0.0172959	0.0610141	±	0.0394045	0.0719095	±	0.0339684	0.0544769	±	0.0335465	0.0719095	±
OTU461	Acidobacteria	Acidobacteria_Gp3	Gp3	Gp3_unclassified	Gp3_unclassified	0.0762677	±	0.0164517	0.0631932	±	0.00998578	0.0784468	±	0.00653723	0.113312	±	0.0199716	0.0784468	±	0.0261489	0.0958794	±	0.022958	0.084984	±	0.0339684	0.0697304	±	0.0247496	0.104596	±	0.0397644	0.0675514	±	0.0164517	0.0784468	±	0.0428675	0.0806258	±	0.0329033	0.104596	±	0.0226456	0.0762677	±	0.0199716	0.0457606	±
OTU73	Bacteroidetes	Sphingobacteriia	Sphingobacteriales	Sphingobacteriaceae	Pedobacter	0.137282	±	0.0915212	0.0893421	±	0.0264199	0.0893421	±	0.022958	0.0697304	±	0.0164517	0.100238	±	0.0308937	0.0893421	±	0.0264199	0.108954	±	0.0555985	0.128566	±	0.0728933	0.0653723	±	0.00653723	0.100238	±	0.0571151	0.0697304	±	0.0247496	0.0784468	±	0.0130745	0.0980584	±	0.0428675	0.0544769	±	0.00998578	0.0392234	±
OTU355	Proteobacteria	Gammaproteobacteria	Xanthomonadales	Xanthomonadaceae	Xanthomonadaceae_unclassified	0.108954	±	0.0699005	0.115491	±	0.0481867	0.0806258	±	0.046379	0.0828049	±	0.0490655	0.14164	±	0.11423	0.0958794	±	0.0210143	0.0675514	±	0.0507776	0.104596	±	0.0742487	0.0631932	±	0.0593173	0.0762677	±	0.0308937	0.0719095	±	0.0339684	0.0522978	±	0.0457606	0.0326861	±	0.0130745	0.0588351	±	0.00653723	0.0719095	±
OTU125	Actinobacteria	Actinobacteria	Actinomycetales	Microbacteriaceae	Agromyces	0.0653723	±	0.0196117	0.0871631	±	0.00377427	0.0631932	±	0.022958	0.0697304	±	0.0335465	0.0762677	±	0.0210143	0.0806258	±	0.0264199	0.0631932	±	0.0210143	0.0784468	±	0.0345918	0.0653723	±	0.0261489	0.0479397	±	0.0377427	0.0588351	±	0.0299573	0.0719095	±	0.040825	0.0762677	±	0.045916	0.0522978	±	0.0196117	0.0479397	±
OTU156	Planctomycetes	Planctomycetia	Planctomycetales	Planctomycetaceae	Pirellula	0.0740886	±	0.022958	0.0675514	±	0.0335465	0.0719095	±	0.0363978	0.0435815	±	0.0264199	0.0457606	±	0.0196117	0.0610141	±	0.0399431	0.0501188	±	0.0164517	0.0610141	±	0.022958	0.0653723	±	0.0363978	0.0697304	±	0.0322474	0.0893421	±	0.0329033	0.113312	±	0.0371723	0.0828049	±	0.0272167	0.0719095	±	0.0428675	0.0697304	±
OTU328	candidate_division_WPS-1	candidate_division_WPS-1_unclassified	candidate_division_WPS-1_unclassified	candidate_division_WPS-1_unclassified	candidate_division_WPS-1_unclassified	0.0326861	±	0.0130745	0.056656	±	0.0164517	0.0479397	±	0.0425339	0.0762677	±	0.0360043	0.0806258	±	0.0494991	0.0414025	±	0.0210143	0.0719095	±	0.0235703	0.0828049	±	0.0360043	0.0479397	±	0.0360043	0.0457606	±	0.00653723	0.0762677	±	0.00998578	0.0980584	±	0.0345918	0.0675514	±	0.0335465	0.0653723	±	0.0172959	0.0501188	±
OTU103	Proteobacteria	Betaproteobacteria	Methylophilales	Methylophilaceae	Methylovorus	0.00435815	±	0.00754854	0.00217908	±	0.00377427	0	±	0	0.00217908	±	0.00377427	0.0762677	±	0.0150971	0.0806258	±	0.022958	0.176505	±	0.138367	0.111133	±	0.049355	0.0261489	±	0.0196117	0.0457606	±	0.0261489	0.0631932	±	0.00377427	0.119849	±	0.130962	0.0631932	±	0.0544333	0.0762677	±	0.0641626	0.0326861	±
OTU154	Proteobacteria	Betaproteobacteria	Burkholderiales	Burkholderiaceae	Cupriavidus	0	±	0	0	±	0	0	±	0	0	±	0	0	±	0	0.00653723	±	0.00653723	0.00217908	±	0.00377427	0	±	0	0.00871631	±	0.0150971	0.00435815	±	0.00754854	0.00871631	±	0.0150971	0.0108954	±	0.00998578	0.0108954	±	0.0188714	0.193938	±	0.264765	0.00217908	±
OTU276	Proteobacteria	Deltaproteobacteria	Desulfuromonadales	Geobacteraceae	Geobacter	0.0414025	±	0.0301942	0.0392234	±	0.0235703	0.0588351	±	0.0226456	0.0348652	±	0.00377427	0.0610141	±	0.0150971	0.0675514	±	0.0199716	0.119849	±	0.0661306	0.056656	±	0.0308937	0.0784468	±	0.0392234	0.344294	±	0.364466	0.21137	±	0.192858	0.0261489	±	0.0235703	0.0479397	±	0.0272167	0.0392234	±	0.0235703	0.0653723	±
OTU246	Bacteroidetes	Cytophagia	Cytophagales	Ohtaekwangia	Ohtaekwangia_unclassified	0.0675514	±	0.0308937	0.0806258	±	0.0210143	0.0893421	±	0.0136083	0.0522978	±	0.0226456	0.0958794	±	0.0247496	0.0414025	±	0.00377427	0.0501188	±	0.0188714	0.11767	±	0.0172959	0.0784468	±	0.0363978	0.0937003	±	0.0247496	0.0762677	±	0.0472915	0.0653723	±	0.0235703	0.0871631	±	0.0247496	0.0610141	±	0.0272167	0.0806258	±
OTU2452	Planctomycetes	Planctomycetia	Planctomycetales	Planctomycetaceae	Planctomycetaceae_unclassified	0.0479397	±	0.0247496	0.0522978	±	0.00653723	0.0522978	±	0.0345918	0.0196117	±	0.0172959	0.106775	±	0.041517	0.0915212	±	0.0299573	0.0675514	±	0.046379	0.108954	±	0.0199716	0.104596	±	0.040825	0.0348652	±	0.0210143	0.0762677	±	0.0360043	0.0915212	±	0.0558541	0.0544769	±	0.00998578	0.0980584	±	0.0130745	0.0871631	±
OTU148	Actinobacteria	Actinobacteria	Acidimicrobiales	Acidimicrobiales_unclassified	Acidimicrobiales_unclassified	0.0893421	±	0.022958	0.126386	±	0.0425339	0.122028	±	0.0607411	0.104596	±	0.0235703	0.0653723	±	0.0284951	0.084984	±	0.00653723	0.0762677	±	0.0164517	0.0740886	±	0.0494991	0.0479397	±	0.029478	0.0588351	±	0.0196117	0.0501188	±	0.0329033	0.0610141	±	0.00377427	0.0871631	±	0.0210143	0.0544769	±	0.0264199	0.0501188	±
OTU1356	Actinobacteria	Actinobacteria	Actinomycetales	Micromonosporaceae	Micromonospora	0.100238	±	0.0360043	0.0871631	±	0.0272167	0.119849	±	0.043527	0.104596	±	0.040825	0.0958794	±	0.0247496	0.0457606	±	0.00653723	0.0893421	±	0.0188714	0.0893421	±	0.00377427	0.0544769	±	0.0247496	0.0653723	±	0.0235703	0.0893421	±	0.0827762	0.0631932	±	0.0210143	0.0871631	±	0.0335465	0.0653723	±	0.0130745	0.0501188	±
OTU444	Actinobacteria	Actinobacteria	Solirubrobacterales	Solirubrobacteraceae	Solirubrobacter	0.0806258	±	0.029478	0.0958794	±	0.00754854	0.0631932	±	0.0136083	0.122028	±	0.0199716	0.0806258	±	0.058956	0.100238	±	0.029478	0.084984	±	0.0113228	0.0871631	±	0.0329033	0.0414025	±	0.00754854	0.0588351	±	0.0130745	0.0544769	±	0.0264199	0.0653723	±	0.0130745	0.0370443	±	0.0210143	0.0784468	±	0.0172959	0.0697304	±
OTU288	Acidobacteria	Acidobacteria_Gp7	Gp7	Gp7_unclassified	Gp7_unclassified	0.056656	±	0.0264199	0.0544769	±	0.022958	0.0435815	±	0.0329033	0.0806258	±	0.0210143	0.084984	±	0.0196117	0.0762677	±	0.0301942	0.0915212	±	0.0284951	0.104596	±	0.0795288	0.126386	±	0.108276	0.0937003	±	0.00377427	0.0915212	±	0.0113228	0.084984	±	0.0113228	0.0915212	±	0.0299573	0.0893421	±	0.0544333	0.0806258	±
OTU436	Firmicutes	Bacilli	Bacillales	Paenibacillaceae_1	Paenibacillus	0.0719095	±	0.0345918	0.0784468	±	0.0196117	0.0828049	±	0.0301942	0.0414025	±	0.0164517	0.0544769	±	0.0210143	0.0217908	±	0.00377427	0.0544769	±	0.0308937	0.0392234	±	0.0284951	0.028328	±	0.0322474	0.0392234	±	0.0130745	0.0370443	±	0.0136083	0.0414025	±	0.0272167	0.0392234	±	0.0299573	0.0435815	±	0.00998578	0.0457606	±
OTU191	Verrucomicrobia	Opitutae	Opitutales	Opitutaceae	Opitutus	0.0479397	±	0.00754854	0.056656	±	0.00754854	0.056656	±	0.0136083	0.0392234	±	0.0235703	0.0631932	±	0.022958	0.0893421	±	0.0621323	0.0501188	±	0.0264199	0.084984	±	0.0172959	0.0784468	±	0	0.084984	±	0.0172959	0.0740886	±	0.029478	0.0915212	±	0.0235703	0.0653723	±	0.0235703	0.0457606	±	0.00653723	0.0610141	±
OTU131	Chloroflexi	Anaerolineae	Anaerolineales	Anaerolineaceae	Ornatilinea	0.0392234	±	0.0299573	0.0610141	±	0.0399431	0.0631932	±	0.0377427	0.028328	±	0.0335465	0.0806258	±	0.045916	0.0762677	±	0.0507776	0.108954	±	0.101345	0.0871631	±	0.0360043	0.102417	±	0.0532426	0.145998	±	0.134026	0.0937003	±	0.0607411	0.0828049	±	0.0394045	0.0588351	±	0.0392234	0.084984	±	0.0864794	0.0719095	±
OTU408	Firmicutes	Bacilli	Bacillales	Bacillaceae_1	Bacillus	0.104596	±	0.0854854	0.0871631	±	0.0524339	0.143819	±	0.0569902	0.0937003	±	0.0528398	0.0762677	±	0.00754854	0.0980584	±	0.0363978	0.0631932	±	0.0544333	0.0937003	±	0.0617875	0.0588351	±	0.0284951	0.0980584	±	0.0130745	0.0828049	±	0.058956	0.0610141	±	0.0136083	0.0414025	±	0.00377427	0.0544769	±	0.0247496	0.0414025	±
OTU134	Verrucomicrobia	Verrucomicrobiae	Verrucomicrobiales	Verrucomicrobiaceae	Verrucomicrobium	0	±	0	0	±	0	0	±	0	0	±	0	0	±	0	0	±	0	0	±	0	0	±	0	0	±	0	0.00653723	±	0.0113228	0	±	0	0.00653723	±	0.0113228	0.00435815	±	0.00377427	0.0174326	±	0.0150971	0.00217908	±
OTU113	Acidobacteria	Acidobacteria_Gp7	Gp7	Gp7_unclassified	Gp7_unclassified	0.0719095	±	0.00653723	0.113312	±	0.041517	0.0631932	±	0.0335465	0.108954	±	0.0425339	0.113312	±	0.00998578	0.0740886	±	0.0481867	0.126386	±	0.0617875	0.124207	±	0.0581042	0.0762677	±	0.044498	0.0828049	±	0.0308937	0.0762677	±	0.0301942	0.0588351	±	0.0284951	0.0675514	±	0.0425339	0.0501188	±	0.0150971	0.0893421	±
OTU211	Actinobacteria	Actinobacteria	Actinobacteria_unclassified	Actinobacteria_unclassified	Actinobacteria_unclassified	0.152535	±	0.0563619	0.148177	±	0.0210143	0.156894	±	0.0949587	0.159073	±	0.045916	0.122028	±	0.117367	0.056656	±	0.0301942	0.0915212	±	0.0196117	0.150356	±	0.0397644	0.0958794	±	0.00754854	0.0261489	±	4.24919e-18	0.0653723	±	0.0113228	0.0239698	±	0.00377427	0.0348652	±	0.00998578	0.0305071	±	0.0308937	0.056656	±
OTU88	Chloroflexi	Caldilineae	Caldilineales	Caldilineaceae	Caldilinea	0.115491	±	0.0399431	0.0784468	±	0.0172959	0.106775	±	0.00998578	0.122028	±	0.0136083	0.0958794	±	0.0264199	0.0806258	±	0.0399431	0.0915212	±	0.0235703	0.0784468	±	0.0196117	0.0588351	±	0.0452913	0.0501188	±	0.0371723	0.0653723	±	0.0261489	0.0740886	±	0.0199716	0.0719095	±	0.0345918	0.0239698	±	0.0150971	0.0457606	±
OTU155	Planctomycetes	Planctomycetia	Planctomycetales	Planctomycetaceae	Pirellula	0.0588351	±	0.0113228	0.0522978	±	0.0569902	0.0239698	±	0.0150971	0.0697304	±	0.0188714	0.0697304	±	0.0360043	0.0871631	±	0.0322474	0.0631932	±	0.029478	0.0610141	±	0.0308937	0.0915212	±	0.0682507	0.0697304	±	0.00754854	0.0762677	±	0.029478	0.0653723	±	0.0235703	0.0479397	±	0.022958	0.0719095	±	0.0235703	0.0915212	±
OTU299	Proteobacteria	Alphaproteobacteria	Rhizobiales	Rhizobiaceae	Ensifer	0.0479397	±	0.0199716	0.0217908	±	0.00998578	0.00871631	±	0.00998578	0.0370443	±	0.0360043	0.0631932	±	0.00754854	0.0588351	±	0.0130745	0.100238	±	0.0164517	0.0457606	±	0.0235703	0.0915212	±	0.0682507	0.0326861	±	0.00653723	0.0784468	±	0.0569902	0.0544769	±	0.0667737	0.113312	±	0.0892358	0.0631932	±	0.0247496	0.209191	±
OTU316	Proteobacteria	Betaproteobacteria	Burkholderiales	Comamonadaceae	Hydrogenophaga	0.00653723	±	0.0113228	0.00871631	±	0.00998578	0.00435815	±	0.00754854	0.00871631	±	0.00998578	0.106775	±	0.0563619	0.0915212	±	0.0397644	0.11767	±	0.0510574	0.0915212	±	0.0428675	0.0239698	±	0.0301942	0.28328	±	0.418604	0.198296	±	0.310111	0.0631932	±	0.0308937	0.0501188	±	0.0399431	0.0217908	±	0.00998578	0.0326861	±
OTU260	Actinobacteria	Actinobacteria	Actinomycetales	Nocardioidaceae	Nocardioides	0.130745	±	0.0428675	0.0958794	±	0.0507776	0.0937003	±	0.0661306	0.0915212	±	0.0392234	0.084984	±	0.0452913	0.0762677	±	0.0210143	0.102417	±	0.0264199	0.0806258	±	0.0264199	0.056656	±	0.0360043	0.0435815	±	0.0371723	0.0457606	±	0.0196117	0.0392234	±	0.0284951	0.056656	±	0.0301942	0.0414025	±	0.0360043	0.056656	±
OTU196	Chloroflexi	Chloroflexi_unclassified	Chloroflexi_unclassified	Chloroflexi_unclassified	Chloroflexi_unclassified	0.102417	±	0.0164517	0.0631932	±	0.0329033	0.0392234	±	0.0339684	0.0893421	±	0.0136083	0.084984	±	0.0345918	0.0719095	±	0.0235703	0.0631932	±	0.022958	0.0784468	±	0.0235703	0.0784468	±	0.0397644	0.0588351	±	0.0113228	0.0544769	±	0.0425339	0.0675514	±	0.00754854	0.0522978	±	0.0226456	0.0435815	±	0.0528398	0.0479397	±
OTU353	Planctomycetes	Planctomycetia	Planctomycetales	Planctomycetaceae	Planctomycetaceae_unclassified	0.0610141	±	0.0329033	0.0828049	±	0.0164517	0.0653723	±	0.0235703	0.0631932	±	0.0563619	0.0980584	±	0.0261489	0.0697304	±	0.0164517	0.0326861	±	0.0113228	0.0610141	±	0.00377427	0.084984	±	0.0471406	0.0740886	±	0.0371723	0.0980584	±	0.0457606	0.0653723	±	0.00653723	0.0653723	±	0.0235703	0.0653723	±	0.0397644	0.0784468	±
OTU573	Proteobacteria	Alphaproteobacteria	Rhizobiales	Rhizobiales_unclassified	Rhizobiales_unclassified	0.0501188	±	0.0199716	0.0370443	±	0.0136083	0.0501188	±	0.0136083	0.0588351	±	0.0113228	0.0806258	±	0.0335465	0.0610141	±	0.0188714	0.104596	±	0.040825	0.0762677	±	0.0394045	0.084984	±	0.0130745	0.0501188	±	0.0264199	0.0697304	±	0.0136083	0.0501188	±	0.0136083	0.0653723	±	0.0518877	0.0762677	±	0.0136083	0.106775	±
OTU317	Actinobacteria	Actinobacteria_unclassified	Actinobacteria_unclassified	Actinobacteria_unclassified	Actinobacteria_unclassified	0.130745	±	0.0518877	0.0958794	±	0.0150971	0.100238	±	0.0272167	0.0697304	±	0.0136083	0.0588351	±	0.0172959	0.0871631	±	0.0164517	0.0370443	±	0.0481867	0.084984	±	0.0235703	0.0457606	±	0.0299573	0.0828049	±	0.0555985	0.0435815	±	0.0164517	0.0501188	±	0.00998578	0.0740886	±	0.022958	0.0610141	±	0.0360043	0.0915212	±
OTU625	Proteobacteria	Betaproteobacteria	Hydrogenophilales	Hydrogenophilaceae	Thiobacillus	0.0893421	±	0.0774416	0.0740886	±	0.0322474	0.132924	±	0.0998578	0.102417	±	0.0571151	0.0588351	±	0.0457606	0.0326861	±	0.0226456	0.0697304	±	0.0641626	0.0348652	±	0.0360043	0.0806258	±	0.0658067	0.385697	±	0.295552	0.0806258	±	0.029478	0.0261489	±	0.0113228	0.0544769	±	0.0528398	0.0305071	±	0.0272167	0.0348652	±
OTU304	Proteobacteria	Deltaproteobacteria	Myxococcales	Labilitrichaceae	Labilithrix	0.0370443	±	0.0301942	0.0174326	±	0.0199716	0.0544769	±	0.0136083	0.0239698	±	0.00998578	0.0544769	±	0.0136083	0.084984	±	0.0261489	0.0937003	±	0.0301942	0.0457606	±	0.0284951	0.0697304	±	0.00998578	0.0501188	±	0.029478	0.084984	±	0.049355	0.102417	±	0.0164517	0.0544769	±	0.0199716	0.056656	±	0.022958	0.0937003	±
OTU179	Proteobacteria	Betaproteobacteria	Betaproteobacteria_unclassified	Betaproteobacteria_unclassified	Betaproteobacteria_unclassified	0.0762677	±	0.00377427	0.0501188	±	0.0150971	0.0719095	±	0.0226456	0.106775	±	0.0555985	0.0697304	±	0.0481867	0.0828049	±	0.043527	0.0588351	±	0.0226456	0.0326861	±	0.0113228	0.0544769	±	0.00998578	0.132924	±	0.0199716	0.100238	±	0.0528398	0.0719095	±	0.0261489	0.0631932	±	0.045916	0.056656	±	0.0264199	0.0479397	±
OTU138	Acidobacteria	Acidobacteria_Gp6	Gp6	Gp6_unclassified	Gp6_unclassified	0.104596	±	0.0397644	0.102417	±	0.00998578	0.111133	±	0.0510574	0.0784468	±	0.0457606	0.0828049	±	0.0272167	0.0522978	±	0.0339684	0.0501188	±	0.0371723	0.0740886	±	0.0264199	0.0414025	±	0.029478	0.0784468	±	0.0326861	0.0631932	±	0.0555985	0.0457606	±	0.0130745	0.0435815	±	0.0136083	0.0958794	±	0.0499289	0.0653723	±
OTU348	Actinobacteria	Actinobacteria	Actinomycetales	Cellulomonadaceae	Cellulomonas	0.119849	±	0.0164517	0.0937003	±	0.0322474	0.126386	±	0.0563619	0.0806258	±	0.00754854	0.0544769	±	0.0264199	0.0697304	±	0.0164517	0.0871631	±	0.0136083	0.0828049	±	0.0308937	0.056656	±	0.0394045	0.0392234	±	0.0261489	0.0631932	±	0.0264199	0.0631932	±	0.0188714	0.056656	±	0.0164517	0.056656	±	0.0247496	0.0653723	±
OTU297	candidate_division_WPS-1	candidate_division_WPS-1_unclassified	candidate_division_WPS-1_unclassified	candidate_division_WPS-1_unclassified	candidate_division_WPS-1_unclassified	0.0631932	±	0.00998578	0.0392234	±	0.0235703	0.0653723	±	0.0345918	0.0370443	±	0.00754854	0.0588351	±	0.040825	0.0719095	±	0.0235703	0.0653723	±	0.0113228	0.0915212	±	0.0235703	0.0828049	±	0.0490655	0.056656	±	0.0164517	0.0828049	±	0.0272167	0.0675514	±	0.0199716	0.0348652	±	0.00754854	0.0544769	±	0.0301942	0.0610141	±
OTU176	Acidobacteria	Acidobacteria_Gp6	Gp6	Gp6_unclassified	Gp6_unclassified	0.0588351	±	0.0196117	0.0675514	±	0.00998578	0.0588351	±	0.0299573	0.0719095	±	0.0471406	0.0806258	±	0.0528398	0.102417	±	0.0607411	0.0697304	±	0.0377427	0.0893421	±	0.058956	0.0893421	±	0.0644948	0.0479397	±	0.022958	0.0370443	±	0.00377427	0.0784468	±	0.0510574	0.0392234	±	0.0196117	0.0588351	±	0.0345918	0.0631932	±
OTU201	Chloroflexi	Caldilineae	Caldilineales	Caldilineaceae	Litorilinea	0.0893421	±	0.022958	0.0501188	±	0.0199716	0.0784468	±	0.0235703	0.056656	±	0.0383047	0.0980584	±	0.049355	0.0610141	±	0.0247496	0.0806258	±	0.0210143	0.104596	±	0.0397644	0.0828049	±	0.044498	0.0457606	±	0.0299573	0.0915212	±	0.00653723	0.0958794	±	0.0383047	0.0544769	±	0.0210143	0.056656	±	0.0264199	0.0392234	±
OTU1678	Proteobacteria	Betaproteobacteria	Betaproteobacteria_unclassified	Betaproteobacteria_unclassified	Betaproteobacteria_unclassified	0.0610141	±	0.0210143	0.0675514	±	0.029478	0.0740886	±	0.0264199	0.0414025	±	0.00998578	0.084984	±	0.0299573	0.0937003	±	0.0301942	0.0522978	±	0.0284951	0.0893421	±	0.0247496	0.0806258	±	0.0603883	0.0740886	±	0.0371723	0.0937003	±	0.0481867	0.0610141	±	0.0360043	0.0915212	±	0.0428675	0.0544769	±	0.0377427	0.0675514	±
OTU187	Planctomycetes	Planctomycetia	Planctomycetales	Planctomycetaceae	Aquisphaera	0.0806258	±	0.00754854	0.056656	±	0.0136083	0.0828049	±	0.00377427	0.0719095	±	0.040825	0.0392234	±	0.0261489	0.0544769	±	0.00998578	0.0479397	±	0.00998578	0.0806258	±	0.00998578	0.0610141	±	0.0308937	0.0479397	±	0.0136083	0.0980584	±	0.0535095	0.100238	±	0.0774416	0.0501188	±	0.0544333	0.0348652	±	0.0188714	0.0631932	±
OTU469	Bacteroidetes	Flavobacteriia	Flavobacteriales	Flavobacteriaceae	Chryseobacterium	0.00435815	±	0.00754854	0.0108954	±	0.0188714	0	±	0	0	±	0	0.00217908	±	0.00377427	0	±	0	0	±	0	0	±	0	0	±	0	0.00653723	±	0.00653723	0.00871631	±	0.0150971	0.0108954	±	0.0136083	0.154714	±	0.256734	0.00435815	±	0.00754854	0	±
OTU300	Proteobacteria	Gammaproteobacteria	Xanthomonadales	Sinobacteraceae	Sinobacteraceae_unclassified	0.0305071	±	0.0188714	0.0457606	±	0.0113228	0.0435815	±	0.0188714	0.0479397	±	0.0150971	0.102417	±	0.0654812	0.0522978	±	0.0339684	0.0697304	±	0.0247496	0.102417	±	0.0532426	0.104596	±	0.0235703	0.102417	±	0.0524339	0.0631932	±	0.0164517	0.0806258	±	0.0329033	0.0457606	±	0.0196117	0.0631932	±	0.045916	0.0414025	±
OTU4533	Proteobacteria	Betaproteobacteria	Betaproteobacteria_unclassified	Betaproteobacteria_unclassified	Betaproteobacteria_unclassified	0.0740886	±	0.0150971	0.0522978	±	0.00653723	0.0915212	±	0.068874	0.056656	±	0.0360043	0.0588351	±	0.040825	0.0653723	±	0.0691835	0.0370443	±	0.0360043	0.0588351	±	0.0172959	0.0457606	±	0.0397644	0.0719095	±	0.0196117	0.0697304	±	0.0308937	0.0784468	±	0.0172959	0.056656	±	0.0164517	0.0828049	±	0.075768	0.0370443	±
OTU186	Verrucomicrobia	Spartobacteria	Spartobacteria_unclassified	Spartobacteria_unclassified	Spartobacteria_unclassified	0.0414025	±	0.0360043	0.0174326	±	0.00998578	0.0370443	±	0.00998578	0.0392234	±	0.0284951	0.0653723	±	0.0299573	0.0588351	±	0.0113228	0.0479397	±	0.022958	0.0588351	±	0.0130745	0.0414025	±	0.022958	0.0610141	±	0.0425339	0.0937003	±	0.0335465	0.0414025	±	0.0136083	0.0740886	±	0.0199716	0.0871631	±	0.0210143	0.0653723	±
OTU236	Candidatus_Saccharibacteria	Candidatus_Saccharibacteria_unclassified	Candidatus_Saccharibacteria_unclassified	Candidatus_Saccharibacteria_unclassified	Candidatus_Saccharibacteria_unclassified	0.0108954	±	0.00754854	0.0130745	±	0.00653723	0.0239698	±	0.00377427	0.00871631	±	0.00754854	0.0915212	±	0.0299573	0.0588351	±	0.0510574	0.0675514	±	0.00377427	0.0653723	±	0.0535095	0.056656	±	0.0199716	0.0457606	±	0.0172959	0.100238	±	0.0472915	0.100238	±	0.0699005	0.106775	±	0.058956	0.0501188	±	0.0524339	0.104596	±
OTU242	Verrucomicrobia	Subdivision3	Subdivision3_unclassified	Subdivision3_unclassified	Subdivision3_unclassified	0.0174326	±	0.00377427	0.0326861	±	0.0261489	0.0610141	±	0.0272167	0.0501188	±	0.0136083	0.0501188	±	0.022958	0.0501188	±	0.0150971	0.0348652	±	0.0247496	0.0522978	±	0.0235703	0.0697304	±	0.00754854	0.0937003	±	0.0371723	0.0740886	±	0.0247496	0.0828049	±	0.0377427	0.0501188	±	0.0136083	0.0719095	±	0.00653723	0.0719095	±
OTU264	Acidobacteria	Acidobacteria_Gp3	Gp3	Gp3_unclassified	Gp3_unclassified	0.0610141	±	0.041517	0.0261489	±	0.00653723	0.0588351	±	0.0623612	0.056656	±	0.0164517	0.0479397	±	0.0322474	0.056656	±	0.0247496	0.0697304	±	0.045916	0.0457606	±	0.0130745	0.0893421	±	0.0494991	0.154714	±	0.091599	0.102417	±	0.0563619	0.11767	±	0.0428675	0.0544769	±	0.0360043	0.0544769	±	0.0247496	0.0871631	±
OTU366	Proteobacteria	Alphaproteobacteria	Rhizobiales	Hyphomicrobiaceae	Pedomicrobium	0.0479397	±	0.0264199	0.0414025	±	0.0164517	0.0522978	±	0.0326861	0.0653723	±	0.0707109	0.0631932	±	0.0199716	0.0697304	±	0.0136083	0.0653723	±	0.0397644	0.0610141	±	0.00377427	0.0697304	±	0.0150971	0.056656	±	0.044498	0.0980584	±	0.0326861	0.0719095	±	0.0345918	0.056656	±	0.00377427	0.0806258	±	0.0499289	0.0915212	±
OTU167	Planctomycetes	Planctomycetia	Planctomycetales	Planctomycetaceae	Gemmata	0.0435815	±	0.0272167	0.0501188	±	0.0136083	0.0501188	±	0.0394045	0.0414025	±	0.022958	0.0762677	±	0.0264199	0.0740886	±	0.0593173	0.0871631	±	0.0164517	0.0522978	±	0.00653723	0.0588351	±	0.0172959	0.0457606	±	0.0235703	0.0784468	±	0.0363978	0.084984	±	0.0326861	0.0675514	±	0.0136083	0.0501188	±	0.0247496	0.0675514	±
OTU252	Planctomycetes	Planctomycetia	Planctomycetales	Planctomycetaceae	Gimesia	0.0544769	±	0.0188714	0.0501188	±	0.0210143	0.0828049	±	0.0164517	0.0457606	±	0.00653723	0.0457606	±	0.0471406	0.056656	±	0.0264199	0.0435815	±	0.0136083	0.0610141	±	0.0272167	0.0675514	±	0.029478	0.0544769	±	0.0425339	0.122028	±	0.0499289	0.0697304	±	0.029478	0.0610141	±	0.00998578	0.084984	±	0.00653723	0.0806258	±
OTU262	Acidobacteria	Acidobacteria_Gp6	Gp6	Gp6_unclassified	Gp6_unclassified	0.0937003	±	0.0335465	0.0762677	±	0.0264199	0.104596	±	0.040825	0.111133	±	0.040825	0.0522978	±	0.0630428	0.056656	±	0.0188714	0.0348652	±	0.00754854	0.0479397	±	0.0322474	0.0457606	±	0.0363978	0.0784468	±	0.0854854	0.0762677	±	0.044498	0.0435815	±	0.00754854	0.0588351	±	0.0569902	0.0435815	±	0.0528398	0.0326861	±
OTU136	Bacteria_unclassified	Bacteria_unclassified	Bacteria_unclassified	Bacteria_unclassified	Bacteria_unclassified	0.0588351	±	0.00653723	0.056656	±	0.0247496	0.0631932	±	0.0555985	0.0762677	±	0.00754854	0.0414025	±	0.0383047	0.056656	±	0.0264199	0.0675514	±	0.0272167	0.0697304	±	0.0329033	0.0784468	±	0.0261489	0.122028	±	0.0555985	0.0806258	±	0.0607411	0.0958794	±	0.0555985	0.0762677	±	0.0272167	0.0675514	±	0.0322474	0.0675514	±
OTU2566	Acidobacteria	Acidobacteria_Gp6	Gp6	Gp6_unclassified	Gp6_unclassified	0.0217908	±	0.00377427	0.056656	±	0.0150971	0.0675514	±	0.00998578	0.0522978	±	0.0196117	0.0457606	±	0.00653723	0.0937003	±	0.0335465	0.0610141	±	0.022958	0.0719095	±	0.00653723	0.0610141	±	0.00998578	0.0937003	±	0.00998578	0.0675514	±	0.0164517	0.0784468	±	0.00653723	0.0479397	±	0.0322474	0.0631932	±	0.0308937	0.0719095	±
OTU2310	Proteobacteria	Betaproteobacteria	Burkholderiales	Comamonadaceae	Ramlibacter	0.0348652	±	0.022958	0.0435815	±	0.0136083	0.0239698	±	0.00377427	0.028328	±	0.00754854	0.0522978	±	0.0235703	0.0435815	±	0.0136083	0.0326861	±	0.0113228	0.0414025	±	0.0199716	0.0697304	±	0.0210143	0.0522978	±	0.0363978	0.0479397	±	0.0247496	0.0501188	±	0.0136083	0.0806258	±	0.0308937	0.0806258	±	0.0247496	0.0326861	±
OTU510	Bacteria_unclassified	Bacteria_unclassified	Bacteria_unclassified	Bacteria_unclassified	Bacteria_unclassified	0.0653723	±	0.0235703	0.106775	±	0.0164517	0.0915212	±	0.0172959	0.0871631	±	0.0164517	0.0522978	±	0.0326861	0.0980584	±	0.0196117	0.0501188	±	0.0329033	0.0740886	±	0.0188714	0.0697304	±	0.0136083	0.0675514	±	0.022958	0.0457606	±	0.0130745	0.0457606	±	0.0299573	0.0588351	±	0.0284951	0.0522978	±	0.00653723	0.0610141	±
OTU178	Actinobacteria	Actinobacteria	Acidimicrobiales	Acidimicrobiaceae	Acidimicrobiaceae_unclassified	0.0740886	±	0.0264199	0.056656	±	0.0150971	0.0806258	±	0.0322474	0.0806258	±	0.022958	0.0239698	±	0.00998578	0.0217908	±	0.0264199	0.028328	±	0.00998578	0.0501188	±	0.0164517	0.106775	±	0.0264199	0.0806258	±	0.0425339	0.0915212	±	0.0235703	0.0675514	±	0.0335465	0.0588351	±	0.0196117	0.0893421	±	0.0481867	0.0588351	±
OTU401	Actinobacteria	Actinobacteria	Acidimicrobiales	Acidimicrobiales_unclassified	Acidimicrobiales_unclassified	0.0762677	±	0.00998578	0.0806258	±	0.0394045	0.0806258	±	0.0164517	0.0697304	±	0.0150971	0.0522978	±	0.0196117	0.028328	±	0.0136083	0.0457606	±	0.0235703	0.0326861	±	0.0235703	0.0631932	±	0.0210143	0.0522978	±	0.0566141	0.0588351	±	0.0261489	0.056656	±	0.0136083	0.0588351	±	0.0130745	0.0610141	±	0.00754854	0.0958794	±
OTU159	Firmicutes	Clostridia	Clostridiales	Clostridiaceae_1	Clostridium_sensu_stricto	0.113312	±	0.00998578	0.0980584	±	0.040825	0.0893421	±	0.00754854	0.0871631	±	0.0264199	0.056656	±	0.0136083	0.056656	±	0.0371723	0.0697304	±	0.0308937	0.0239698	±	0.0188714	0.0392234	±	0.00653723	0.0414025	±	0.022958	0.0435815	±	0.0371723	0.0457606	±	0.0196117	0.0326861	±	0.0363978	0.106775	±	0.146226	0.028328	±
OTU127	Planctomycetes	Planctomycetia	Planctomycetales	Planctomycetaceae	Planctomycetaceae_unclassified	0.0522978	±	0.0172959	0.0305071	±	0.00998578	0.0370443	±	0.0210143	0.028328	±	0.0136083	0.0544769	±	0.0210143	0.0348652	±	0.0136083	0.0326861	±	0.0113228	0.0544769	±	0.0360043	0.0631932	±	0.044498	0.0370443	±	0.0301942	0.0348652	±	0.00377427	0.028328	±	0.0272167	0.0588351	±	0.0172959	0.0784468	±	0.0682507	0.0675514	±
OTU207	Bacteroidetes	Cytophagia	Cytophagales	Ohtaekwangia	Ohtaekwangia_unclassified	0.0675514	±	0.0136083	0.0784468	±	0.0196117	0.0631932	±	0.0528398	0.102417	±	0.0507776	0.0217908	±	0.00377427	0.0392234	±	0.0235703	0.0631932	±	0.0335465	0.0588351	±	0.0196117	0.056656	±	0.0360043	0.0762677	±	0.00998578	0.0784468	±	0.0345918	0.0915212	±	0.0630428	0.0348652	±	0.00998578	0.0435815	±	0.00998578	0.056656	±
OTU4812	Proteobacteria	Alphaproteobacteria	Rhizobiales	Rhizobiales_unclassified	Rhizobiales_unclassified	0.0828049	±	0.029478	0.0631932	±	0.022958	0.0980584	±	0.0558541	0.0784468	±	0.0172959	0.0784468	±	0.0397644	0.0697304	±	0.0188714	0.0806258	±	0.0329033	0.0392234	±	0.0235703	0.0479397	±	0.0322474	0.0479397	±	0.0136083	0.0414025	±	0.0199716	0.0544769	±	0.0136083	0.0675514	±	0.00998578	0.0435815	±	0.00998578	0.0544769	±
OTU216	Acidobacteria	Acidobacteria_Gp6	Gp6	Gp6_unclassified	Gp6_unclassified	0.084984	±	0.0235703	0.0806258	±	0.0329033	0.084984	±	0.0226456	0.0544769	±	0.0150971	0.0762677	±	0.0680416	0.0501188	±	0.0136083	0.0740886	±	0.0383047	0.0457606	±	0.0235703	0.0675514	±	0.0720085	0.0697304	±	0.0377427	0.0522978	±	0.0397644	0.056656	±	0.00377427	0.0414025	±	0.0371723	0.0544769	±	0.00754854	0.0414025	±
OTU2193	Proteobacteria	Betaproteobacteria	Betaproteobacteria_unclassified	Betaproteobacteria_unclassified	Betaproteobacteria_unclassified	0.0610141	±	0.0188714	0.0675514	±	0.0164517	0.0479397	±	0.044498	0.0479397	±	0.00998578	0.0479397	±	0.0264199	0.0675514	±	0.00998578	0.0522978	±	0.0345918	0.0544769	±	0.029478	0.0544769	±	0.0136083	0.0937003	±	0.0247496	0.0522978	±	0.0457606	0.0675514	±	0.0360043	0.056656	±	0.0136083	0.028328	±	0.0199716	0.0610141	±
OTU349	Bacteria_unclassified	Bacteria_unclassified	Bacteria_unclassified	Bacteria_unclassified	Bacteria_unclassified	0.0522978	±	0.0196117	0.0806258	±	0.022958	0.100238	±	0.0308937	0.0631932	±	0.046379	0.100238	±	0.043527	0.0915212	±	0.0261489	0.0544769	±	0.0264199	0.0784468	±	0.0345918	0.0675514	±	0.0472915	0.056656	±	0.0136083	0.0610141	±	0.0377427	0.0457606	±	0.0261489	0.0544769	±	0.0322474	0.0675514	±	0.0399431	0.0392234	±
OTU146	Chloroflexi	Chloroflexi_unclassified	Chloroflexi_unclassified	Chloroflexi_unclassified	Chloroflexi_unclassified	0.028328	±	0.0136083	0.0261489	±	0.0235703	0.0348652	±	0.029478	0.0522978	±	0.00653723	0.0675514	±	0.022958	0.0610141	±	0.0399431	0.0631932	±	0.0164517	0.0958794	±	0.0494991	0.0653723	±	0.0326861	0.0544769	±	0.0264199	0.0631932	±	0.0247496	0.0675514	±	0.0164517	0.0915212	±	0.0452913	0.0435815	±	0.0383047	0.084984	±
OTU5650	Proteobacteria	Alphaproteobacteria	Rhodospirillales	Rhodospirillaceae	Skermanella	0.130745	±	0.0113228	0.104596	±	0.049355	0.0915212	±	0.0130745	0.108954	±	0.0654812	0.102417	±	0.0472915	0.0958794	±	0.043527	0.0762677	±	0.0136083	0.0588351	±	0.0299573	0.0675514	±	0.0335465	0.0610141	±	0.0335465	0.0435815	±	0.0247496	0.0196117	±	0.00653723	0.0414025	±	0.0210143	0.0392234	±	0	0.028328	±
OTU192	Acidobacteria	Acidobacteria_Gp6	Gp6	Gp6_unclassified	Gp6_unclassified	0.0653723	±	0.0113228	0.0828049	±	0.00998578	0.0762677	±	0.0199716	0.0893421	±	0.0272167	0.0653723	±	0.0261489	0.0348652	±	0.0199716	0.0631932	±	0.0360043	0.084984	±	0.0457606	0.056656	±	0.0247496	0.0719095	±	0.0113228	0.0828049	±	0.0264199	0.0501188	±	0.00754854	0.0239698	±	0.0150971	0.0479397	±	0.0150971	0.0828049	±
OTU379	Planctomycetes	Planctomycetia	Planctomycetales	Planctomycetaceae	Planctomycetaceae_unclassified	0.0631932	±	0.0335465	0.0457606	±	0.0284951	0.0479397	±	0.022958	0.0544769	±	0.0322474	0.0479397	±	0.00377427	0.0435815	±	0.0308937	0.0522978	±	0.0172959	0.056656	±	0.046379	0.0631932	±	0.00754854	0.056656	±	0.022958	0.0806258	±	0.0360043	0.0588351	±	0.0535095	0.0653723	±	0.0196117	0.0501188	±	0.0420285	0.0675514	±
OTU294	Acidobacteria	Acidobacteria_Gp3	Gp3	Gp3_unclassified	Gp3_unclassified	0.0762677	±	0.0420285	0.0653723	±	0.0130745	0.0893421	±	0.0264199	0.0806258	±	0.0164517	0.0370443	±	0.0210143	0.0631932	±	0.00998578	0.0653723	±	0.040825	0.0479397	±	0.0210143	0.0457606	±	0.0261489	0.0522978	±	0.0284951	0.056656	±	0.00998578	0.0719095	±	0.0299573	0.056656	±	0.0329033	0.0217908	±	0.0210143	0.0610141	±
OTU214	Planctomycetes	Planctomycetia	Planctomycetales	Planctomycetaceae	Gemmata	0.084984	±	0.0261489	0.0457606	±	0.0130745	0.0719095	±	0.0569902	0.0784468	±	0.0196117	0.0370443	±	0.0472915	0.0348652	±	0.0383047	0.0457606	±	0.0284951	0.0784468	±	0.0130745	0.0871631	±	0.045916	0.0740886	±	0.0329033	0.0675514	±	0.045916	0.0653723	±	0.0172959	0.0370443	±	0.0150971	0.0501188	±	0.00754854	0.0588351	±
OTU828	Proteobacteria	Betaproteobacteria	Burkholderiales	Comamonadaceae	Acidovorax	0.0392234	±	0.0226456	0.0479397	±	0.022958	0.0370443	±	0.029478	0.00653723	±	0.0113228	0.0588351	±	0.0261489	0.0435815	±	0.0301942	0.0217908	±	0.0136083	0.0261489	±	0.0113228	0.0370443	±	0.0136083	0.0305071	±	0.0301942	0.0130745	±	0.0113228	0.0414025	±	0.0383047	0.0544769	±	0.0150971	0.172147	±	0.241642	0.0326861	±
OTU293	Verrucomicrobia	Verrucomicrobiae	Verrucomicrobiales	Verrucomicrobiaceae	Verrucomicrobiaceae_unclassified	0.0305071	±	0.00754854	0.0522978	±	0.0345918	0.0414025	±	0.0210143	0.0305071	±	0.0188714	0.0806258	±	0.0360043	0.0784468	±	0.0226456	0.0719095	±	0.00653723	0.084984	±	0.0326861	0.0697304	±	0.0499289	0.0631932	±	0.00998578	0.0697304	±	0.0528398	0.0697304	±	0.0188714	0.0414025	±	0.0188714	0.0588351	±	0.0226456	0.0610141	±
OTU194	Acidobacteria	Acidobacteria_Gp3	Gp3	Gp3_unclassified	Gp3_unclassified	0.0522978	±	8.49837e-18	0.0370443	±	0.0322474	0.0392234	±	0.0397644	0.0414025	±	0.0136083	0.0348652	±	0.0136083	0.0457606	±	0.0284951	0.0828049	±	0.00998578	0.0828049	±	0.0136083	0.0871631	±	0.0329033	0.0784468	±	0.0345918	0.0588351	±	0.0235703	0.0719095	±	0.0299573	0.0370443	±	0.0136083	0.0479397	±	0.0210143	0.0479397	±
OTU231	Bacteria_unclassified	Bacteria_unclassified	Bacteria_unclassified	Bacteria_unclassified	Bacteria_unclassified	0.0392234	±	0.00653723	0.0522978	±	0.0172959	0.0697304	±	0.0272167	0.0479397	±	0.044498	0.11767	±	0.00653723	0.056656	±	0.0360043	0.0937003	±	0.0164517	0.0958794	±	0.0322474	0.0893421	±	0.0164517	0.0697304	±	0.0360043	0.0522978	±	0.040825	0.0348652	±	0.00998578	0.0697304	±	0.0360043	0.0544769	±	0.0264199	0.0588351	±
OTU491	Verrucomicrobia	Verrucomicrobiae	Verrucomicrobiales	Verrucomicrobiaceae	Luteolibacter	0.00217908	±	0.00377427	0.0108954	±	0.00998578	0.00871631	±	0.00754854	0.0196117	±	0.0172959	0.0653723	±	0.0172959	0.0348652	±	0.0247496	0.0631932	±	0.022958	0.0326861	±	0.0235703	0.11767	±	0.0803308	0.028328	±	0.0210143	0.0414025	±	0.0308937	0.0762677	±	0.0399431	0.0784468	±	0.0299573	0.0828049	±	0.0528398	0.0544769	±
OTU445	Actinobacteria	Actinobacteria	Actinobacteria_unclassified	Actinobacteria_unclassified	Actinobacteria_unclassified	0.0631932	±	0.0199716	0.0806258	±	0.0210143	0.0675514	±	0.0247496	0.0784468	±	0.0235703	0.0719095	±	0.0196117	0.0610141	±	0.0247496	0.0610141	±	0.00754854	0.0544769	±	0.0164517	0.056656	±	0.0399431	0.0305071	±	0.0210143	0.0479397	±	0.0335465	0.0501188	±	0.0188714	0.0457606	±	0.0172959	0.0457606	±	0.0326861	0.0675514	±
OTU374	Acidobacteria	Acidobacteria_Gp6	Gp6	Gp6_unclassified	Gp6_unclassified	0.0457606	±	0.0113228	0.0631932	±	0.0136083	0.028328	±	0.0150971	0.0631932	±	0.022958	0.0980584	±	0.0558541	0.0522978	±	0.0326861	0.0631932	±	0.0164517	0.0893421	±	0.0472915	0.106775	±	0.0264199	0.056656	±	0.0199716	0.0719095	±	0.0261489	0.0893421	±	0.0322474	0.0610141	±	0.022958	0.0501188	±	0.029478	0.0544769	±
OTU228	Chloroflexi	Anaerolineae	Anaerolineales	Anaerolineaceae	Anaerolineaceae_unclassified	0.056656	±	0.0399431	0.0479397	±	0.00754854	0.0457606	±	0.0261489	0.0457606	±	0.0196117	0.0501188	±	0.0164517	0.0544769	±	0.0335465	0.0414025	±	0.0136083	0.0740886	±	0.0360043	0.0544769	±	0.0399431	0.056656	±	0.022958	0.0610141	±	0.0210143	0.0784468	±	0.0345918	0.0435815	±	0.0210143	0.0457606	±	0.00653723	0.0544769	±
OTU423	Acidobacteria	Acidobacteria_Gp6	Gp6	Gp6_unclassified	Gp6_unclassified	0.0697304	±	0.0371723	0.0762677	±	0.0272167	0.084984	±	0.0326861	0.0784468	±	0.0235703	0.0871631	±	0.0360043	0.0740886	±	0.0210143	0.100238	±	0.0399431	0.115491	±	0.00998578	0.0893421	±	0.0548245	0.0675514	±	0.029478	0.0871631	±	0.0377427	0.0937003	±	0.0472915	0.0370443	±	0.00377427	0.0326861	±	0.0130745	0.0370443	±
OTU185	Acidobacteria	Acidobacteria_Gp6	Gp6	Gp6_unclassified	Gp6_unclassified	0.0544769	±	0.0150971	0.0828049	±	0.0360043	0.0740886	±	0.0507776	0.0871631	±	0.046379	0.0479397	±	0.022958	0.0631932	±	0.00998578	0.0719095	±	0.0261489	0.0414025	±	0.0136083	0.0588351	±	0.0172959	0.0806258	±	0.0555985	0.0762677	±	0.0322474	0.0697304	±	0.00998578	0.0479397	±	0.00754854	0.0631932	±	0.0420285	0.0631932	±
OTU152	Bacteria_unclassified	Bacteria_unclassified	Bacteria_unclassified	Bacteria_unclassified	Bacteria_unclassified	0.0544769	±	0.0136083	0.0239698	±	0.00754854	0.0305071	±	0.0136083	0.0392234	±	0.0196117	0.0740886	±	0.0329033	0.0958794	±	0.0494991	0.0828049	±	0.0377427	0.0740886	±	0.0743445	0.0544769	±	0.0136083	0.0501188	±	0.029478	0.0544769	±	0.00998578	0.0784468	±	0.0261489	0.0326861	±	0.0172959	0.0414025	±	0.0136083	0.0348652	±
OTU474	Acidobacteria	Acidobacteria_Gp16	Gp16	Gp16_unclassified	Gp16_unclassified	0.0501188	±	0.0308937	0.0937003	±	0.0420285	0.0631932	±	0.0264199	0.0828049	±	0.0394045	0.100238	±	0.0150971	0.0588351	±	0.0299573	0.0697304	±	0.0420285	0.0588351	±	0.0299573	0.0588351	±	0.0299573	0.0697304	±	0.00998578	0.0784468	±	0.0457606	0.0457606	±	0.0172959	0.0348652	±	0.0150971	0.0522978	±	0.0226456	0.0305071	±
OTU279	Proteobacteria	Deltaproteobacteria	Myxococcales	Myxococcales_unclassified	Myxococcales_unclassified	0.0479397	±	0.00998578	0.0501188	±	0.00998578	0.0719095	±	0.0130745	0.0522978	±	0.0235703	0.0479397	±	0.0308937	0.0806258	±	0.0371723	0.0348652	±	0.0164517	0.0414025	±	0.0199716	0.0697304	±	0.0164517	0.0762677	±	0.0264199	0.0261489	±	0.00653723	0.0719095	±	0.0235703	0.0239698	±	0.00377427	0.0697304	±	0.0210143	0.0392234	±
OTU534	Actinobacteria	Actinobacteria	Acidimicrobiales	Iamiaceae	Aquihabitans	0.0806258	±	0.0247496	0.084984	±	0.0130745	0.0915212	±	0.0558541	0.0937003	±	0.0544333	0.0435815	±	0.00377427	0.0370443	±	0.0308937	0.0501188	±	0.00377427	0.056656	±	0.0199716	0.056656	±	0.00998578	0.056656	±	0.022958	0.0522978	±	0.0172959	0.056656	±	0.0420285	0.0457606	±	0.0196117	0.0479397	±	0.0136083	0.0544769	±
OTU280	Fibrobacteres	Fibrobacteria	Fibrobacterales	Fibrobacteraceae	Fibrobacter	0.0893421	±	0.075768	0.0501188	±	0.0199716	0.0370443	±	0.0136083	0.0980584	±	0.0510574	0.106775	±	0.0164517	0.0937003	±	0.046379	0.161252	±	0.0925274	0.115491	±	0.00377427	0.0544769	±	0.0507776	0.0544769	±	0.0150971	0.0348652	±	0.0322474	0.0305071	±	0.0210143	0.0348652	±	0.0247496	0.0457606	±	0.0235703	0.0501188	±
OTU263	Chloroflexi	Chloroflexi_unclassified	Chloroflexi_unclassified	Chloroflexi_unclassified	Chloroflexi_unclassified	0.0261489	±	0.0172959	0.0392234	±	0.0392234	0.0392234	±	0.00653723	0.0544769	±	0.0199716	0.0501188	±	0.0188714	0.0501188	±	0.00754854	0.0239698	±	0.00377427	0.0479397	±	0.0136083	0.0762677	±	0.0199716	0.0719095	±	0.0326861	0.0544769	±	0.0199716	0.0588351	±	0.0392234	0.0762677	±	0.0247496	0.0675514	±	0.0322474	0.0631932	±
OTU310	Proteobacteria	Gammaproteobacteria	Gammaproteobacteria_unclassified	Gammaproteobacteria_unclassified	Gammaproteobacteria_unclassified	0.0217908	±	0.0164517	0.0196117	±	0.0172959	0.0392234	±	0.00653723	0.00871631	±	0.00377427	0.0501188	±	0.0472915	0.0522978	±	0.0510574	0.0610141	±	0.0499289	0.0501188	±	0.0164517	0.0653723	±	0.0345918	0.0675514	±	0.0322474	0.106775	±	0.0360043	0.0414025	±	0.00998578	0.0435815	±	0.0425339	0.0588351	±	0.0630428	0.0915212	±
OTU311	Proteobacteria	Gammaproteobacteria	Xanthomonadales	Xanthomonadaceae	Lysobacter	0.0937003	±	0.0136083	0.0915212	±	0.0510574	0.113312	±	0.0399431	0.0762677	±	0.0308937	0.0740886	±	0.00377427	0.0653723	±	0.0113228	0.0435815	±	0.0150971	0.056656	±	0.041517	0.0435815	±	0.0472915	0.111133	±	0.0623612	0.0740886	±	0.0774416	0.0305071	±	0.00998578	0.0414025	±	0.029478	0.0435815	±	0.0308937	0.0631932	±
OTU7111	Proteobacteria	Betaproteobacteria	Burkholderiales	Alcaligenaceae	Azohydromonas	0.0457606	±	0.00653723	0.0414025	±	0.0210143	0.056656	±	0.00754854	0.0762677	±	0.0322474	0.0522978	±	0.0299573	0.0631932	±	0.0210143	0.0501188	±	0.046379	0.0719095	±	0.00653723	0.0414025	±	0.029478	0.0522978	±	0.0226456	0.0196117	±	0.0113228	0.0457606	±	0.0226456	0.0544769	±	0.0329033	0.0501188	±	0.022958	0.0348652	±
OTU233	Firmicutes	Clostridia	Clostridiales	Clostridiaceae_1	Clostridium_sensu_stricto	0.0675514	±	0.0150971	0.084984	±	0.0261489	0.084984	±	0.0130745	0.0653723	±	0.0284951	0.0871631	±	0.0360043	0.0544769	±	0.0150971	0.0479397	±	0.0264199	0.0610141	±	0.0308937	0.0675514	±	0.0394045	0.0937003	±	0.0399431	0.084984	±	0.0457606	0.0719095	±	0.0345918	0.0326861	±	0.0345918	0.0392234	±	0.00653723	0.0435815	±
OTU234	Armatimonadetes	Armatimonadetes_gp5	Armatimonadetes_gp5_unclassified	Armatimonadetes_gp5_unclassified	Armatimonadetes_gp5_unclassified	0.0348652	±	0.0199716	0.0370443	±	0.00377427	0.0326861	±	0.0113228	0.056656	±	0.0360043	0.0610141	±	0.0164517	0.056656	±	0.0188714	0.0522978	±	0.0299573	0.0370443	±	0.0199716	0.0522978	±	0.0299573	0.0762677	±	0.0164517	0.0697304	±	0.00998578	0.0697304	±	0.00998578	0.0610141	±	0.00998578	0.056656	±	0.0188714	0.0414025	±
OTU1302	Acidobacteria	Acidobacteria_Gp6	Gp6	Gp6_unclassified	Gp6_unclassified	0.0893421	±	0.0136083	0.0479397	±	0.00377427	0.0588351	±	0.0196117	0.0479397	±	0.00754854	0.0675514	±	0.0210143	0.0719095	±	0.0113228	0.0392234	±	0.0397644	0.0653723	±	0.0363978	0.0392234	±	0.0226456	0.0501188	±	0.0164517	0.0784468	±	0.0653723	0.0501188	±	0.0301942	0.0414025	±	0.0301942	0.0501188	±	0.0164517	0.0457606	±
OTU1183	Firmicutes	Bacilli	Bacillales	Bacillaceae_1	Bacillus	0.115491	±	0.00998578	0.132924	±	0.0507776	0.084984	±	0.040825	0.0828049	±	0.0494991	0.0392234	±	0.00653723	0.0784468	±	0.0235703	0.0675514	±	0.00377427	0.0631932	±	0.0188714	0.0348652	±	0.022958	0.0588351	±	0.0113228	0.0239698	±	0.00754854	0.0435815	±	0.0329033	0.0370443	±	0.00998578	0.0414025	±	0.0150971	0.0392234	±
OTU114	Candidatus_Saccharibacteria	Candidatus_Saccharibacteria_unclassified	Candidatus_Saccharibacteria_unclassified	Candidatus_Saccharibacteria_unclassified	Candidatus_Saccharibacteria_unclassified	0	±	0	0	±	0	0	±	0	0	±	0	0.00653723	±	0.00653723	0	±	0	0.00435815	±	0.00754854	0.00871631	±	0.0150971	0.0392234	±	0.0172959	0.161252	±	0.178472	0.115491	±	0.155296	0.0544769	±	0.046379	0.200475	±	0.183315	0.0501188	±	0.046379	0.0544769	±
OTU129	Bacteroidetes	Sphingobacteriia	Sphingobacteriales	Chitinophagaceae	Ferruginibacter	0.0980584	±	0.00653723	0.0937003	±	0.00998578	0.084984	±	0.0113228	0.0719095	±	0.0235703	0.0631932	±	0.00998578	0.056656	±	0.0136083	0.0501188	±	0.0164517	0.0762677	±	0.0150971	0.0544769	±	0.0272167	0.0457606	±	0.00653723	0.0501188	±	0.045916	0.0348652	±	0.0136083	0.0544769	±	0.0210143	0.028328	±	0.00377427	0.0174326	±
OTU277	Actinobacteria	Actinobacteria	Actinomycetales	Nocardiaceae	Rhodococcus	0.0501188	±	0.0264199	0.0784468	±	0.0558541	0.0719095	±	0.0363978	0.0784468	±	0.0299573	0.0435815	±	0.0247496	0.0653723	±	0.0284951	0.0871631	±	0.117731	0.0457606	±	0.0172959	0.0239698	±	0.0136083	0.0392234	±	0.0235703	0.0414025	±	0.0247496	0.0130745	±	0.0113228	0.0217908	±	0.0210143	0.0239698	±	0.00377427	0.028328	±
OTU1138	Proteobacteria	Alphaproteobacteria	Rhizobiales	Rhizobiales_unclassified	Rhizobiales_unclassified	0.0522978	±	0.0113228	0.056656	±	0.00998578	0.0653723	±	0.0345918	0.0893421	±	0.00998578	0.0457606	±	0.0113228	0.0501188	±	0.00998578	0.0522978	±	0.040825	0.0435815	±	0.0264199	0.0610141	±	0.0210143	0.0305071	±	0.00754854	0.0479397	±	0.0164517	0.0522978	±	8.49837e-18	0.0522978	±	0.0172959	0.0414025	±	0.0383047	0.0457606	±
OTU292	Verrucomicrobia	Opitutae	Opitutales	Opitutaceae	Opitutus	0.0479397	±	0.0360043	0.0435815	±	0.0199716	0.0348652	±	0.0164517	0.0326861	±	0.00653723	0.0653723	±	0.0518877	0.0653723	±	0.0235703	0.0392234	±	0.0235703	0.0653723	±	0.0363978	0.0653723	±	0.0345918	0.0544769	±	0.00377427	0.0479397	±	0.0188714	0.0457606	±	0.0226456	0.0435815	±	0.022958	0.0305071	±	0.00377427	0.0479397	±
OTU197	Actinobacteria	Actinobacteria	Acidimicrobiales	Acidimicrobiales_unclassified	Acidimicrobiales_unclassified	0.0762677	±	0.022958	0.0610141	±	0.0322474	0.0828049	±	0.00377427	0.0544769	±	0.0210143	0.0653723	±	0.0226456	0.0370443	±	0.0322474	0.0806258	±	0.058956	0.0697304	±	0.00998578	0.106775	±	0.00998578	0.0479397	±	0.0264199	0.0610141	±	0.0420285	0.0675514	±	0.0188714	0.0392234	±	0.0397644	0.0522978	±	0.0130745	0.0457606	±
OTU257	Bacteria_unclassified	Bacteria_unclassified	Bacteria_unclassified	Bacteria_unclassified	Bacteria_unclassified	0.0479397	±	0.0272167	0.0653723	±	0.0261489	0.0588351	±	0	0.0435815	±	0.0272167	0.084984	±	0.0588351	0.0610141	±	0.0210143	0.0697304	±	0.0136083	0.0457606	±	0.0235703	0.0631932	±	0.0210143	0.0522978	±	0.040825	0.0588351	±	0.0226456	0.0392234	±	0.0261489	0.0501188	±	0.0136083	0.0348652	±	0.00754854	0.0719095	±
OTU173	Candidatus_Saccharibacteria	Candidatus_Saccharibacteria_unclassified	Candidatus_Saccharibacteria_unclassified	Candidatus_Saccharibacteria_unclassified	Candidatus_Saccharibacteria_unclassified	0.00653723	±	0.0113228	0.00653723	±	0.00653723	0.00435815	±	0.00754854	0.0196117	±	0.0172959	0.0610141	±	0.0136083	0.0937003	±	0.00377427	0.0697304	±	0.0571151	0.0719095	±	0.0392234	0.122028	±	0.0981311	0.106775	±	0.0548245	0.261489	±	0.248329	0.00871631	±	0.00377427	0.0261489	±	0.0196117	0.0305071	±	0.029478	0.148177	±
OTU163	Actinobacteria	Actinobacteria	Actinomycetales	Streptosporangiaceae	Streptosporangium	0.0479397	±	0.0164517	0.028328	±	0.0188714	0.0784468	±	0.0397644	0.0828049	±	0.0494991	0.0479397	±	0.0383047	0.135103	±	0.101555	0.0784468	±	0.0363978	0.0610141	±	0.0322474	0.056656	±	0.0164517	0.056656	±	0.0371723	0.0588351	±	0.0345918	0.0392234	±	0.0172959	0.0414025	±	0.0272167	0.0653723	±	0.0397644	0.0435815	±
OTU362	Actinobacteria	Actinobacteria	Acidimicrobiales	Acidimicrobiales_unclassified	Acidimicrobiales_unclassified	0.104596	±	0.0599147	0.16561	±	0.0329033	0.174326	±	0.0528398	0.148177	±	0.045916	0.0348652	±	0.00754854	0.0370443	±	0.00754854	0.028328	±	0.00998578	0.0305071	±	0.0150971	0.0588351	±	0.0172959	0.028328	±	0.022958	0.0305071	±	0.0164517	0.028328	±	0.0210143	0.0326861	±	0.00653723	0.056656	±	0.0199716	0.0414025	±
OTU3011	Actinobacteria	Actinobacteria	Actinomycetales	Cellulomonadaceae	Actinotalea	0.102417	±	0.0548245	0.056656	±	0.0188714	0.113312	±	0.0661306	0.0915212	±	0.0130745	0.0522978	±	0.0113228	0.0588351	±	0.0261489	0.0871631	±	0.0360043	0.0610141	±	0.045916	0.028328	±	0.00998578	0.0588351	±	0.0235703	0.0479397	±	0.0210143	0.0435815	±	0.0264199	0.0522978	±	0.0235703	0.0501188	±	0.0210143	0.0348652	±
OTU239	Proteobacteria	Deltaproteobacteria	Myxococcales	Kofleriaceae	Kofleria	0.0610141	±	0.0528398	0.0457606	±	0.0299573	0.0435815	±	0.0136083	0.0784468	±	0.0363978	0.0479397	±	0.00754854	0.0762677	±	0.0308937	0.0435815	±	0.0164517	0.056656	±	0.0247496	0.0392234	±	0.0284951	0.11767	±	0.135874	0.0261489	±	0.0172959	0.0740886	±	0.043527	0.0370443	±	0.00754854	0.0414025	±	0.0394045	0.0588351	±
OTU206	Firmicutes	Bacilli	Bacillales	Paenibacillaceae_2	Ammoniphilus	0.0588351	±	0.0235703	0.0697304	±	0.0499289	0.0610141	±	0.00377427	0.0675514	±	0.0571151	0.0588351	±	0.0172959	0.0457606	±	0.0326861	0.0348652	±	0.00754854	0.0610141	±	0.0399431	0.0501188	±	0.00377427	0.0675514	±	0.0548245	0.0348652	±	0.0188714	0.0501188	±	0.0199716	0.0697304	±	0.0199716	0.0457606	±	0.0339684	0.0653723	±
OTU241	Proteobacteria	Betaproteobacteria	Burkholderiales	Comamonadaceae	Pseudorhodoferax	0	±	0	0.00435815	±	0.00377427	0.00217908	±	0.00377427	0.00653723	±	0.00653723	0.00435815	±	0.00754854	0	±	0	0.00217908	±	0.00377427	0.00217908	±	0.00377427	0.00217908	±	0.00377427	0.00217908	±	0.00377427	0.00653723	±	0.0113228	0.0108954	±	0.00998578	0.0239698	±	0.041517	0.0196117	±	0.0172959	0.00435815	±
OTU245	Acidobacteria	Acidobacteria_Gp4	Aridibacter	Aridibacter_unclassified	Aridibacter_unclassified	0.0174326	±	0.00377427	0.0239698	±	0.0136083	0.0414025	±	0.0150971	0.028328	±	0.0136083	0.0675514	±	0.0335465	0.084984	±	0.0581042	0.0522978	±	0.0226456	0.0915212	±	0.0235703	0.0392234	±	0.0196117	0.0414025	±	0.0308937	0.0522978	±	0.0299573	0.0588351	±	0.0172959	0.0392234	±	0.0172959	0.0828049	±	0.0555985	0.0610141	±
OTU420	Acidobacteria	Acidobacteria_Gp17	Gp17	Gp17_unclassified	Gp17_unclassified	0.0915212	±	0.0172959	0.0544769	±	0.0272167	0.0653723	±	0.0113228	0.102417	±	0.044498	0.056656	±	0.022958	0.0675514	±	0.022958	0.0392234	±	0.0284951	0.0326861	±	0.0196117	0.0217908	±	0.0150971	0.0610141	±	0.0301942	0.0522978	±	0.0345918	0.0370443	±	0.00998578	0.0544769	±	0.0188714	0.0544769	±	0.044498	0.0610141	±
OTU365	Gemmatimonadetes	Gemmatimonadetes	Gemmatimonadales	Gemmatimonadaceae	Gemmatimonas	0.0370443	±	0.022958	0.0217908	±	0.0199716	0.0130745	±	0.00653723	0.0130745	±	0.0113228	0.0610141	±	0.0499289	0.0239698	±	0.00754854	0.028328	±	0.0164517	0.0392234	±	0.0235703	0.0828049	±	0.0360043	0.0588351	±	0.0130745	0.0828049	±	0.0555985	0.102417	±	0.0555985	0.0740886	±	0.00377427	0.0631932	±	0.0360043	0.0501188	±
OTU757	Chloroflexi	Chloroflexi_unclassified	Chloroflexi_unclassified	Chloroflexi_unclassified	Chloroflexi_unclassified	0.0370443	±	0.0136083	0.0305071	±	0.0150971	0.0326861	±	0.00653723	0.0479397	±	0.0247496	0.0610141	±	0.0301942	0.0435815	±	0.0272167	0.0326861	±	0.0172959	0.100238	±	0.0593173	0.0610141	±	0.0322474	0.0675514	±	0.00754854	0.0588351	±	0.00653723	0.0370443	±	0.0335465	0.0414025	±	0.0164517	0.0435815	±	0.0335465	0.0610141	±
OTU11254	Actinobacteria	Actinobacteria	Actinomycetales	Pseudonocardiaceae	Lentzea	0.102417	±	0.0335465	0.126386	±	0.0210143	0.0806258	±	0.0360043	0.104596	±	0.075391	0.0958794	±	0.0992138	0.0522978	±	0.0345918	0.0305071	±	0.0247496	0.056656	±	0.0136083	0.084984	±	0.0457606	0.0196117	±	0.0113228	0.0370443	±	0.0264199	0.028328	±	0.0199716	0.0217908	±	0.00377427	0.104596	±	0.102741	0.0326861	±
OTU213	Bacteria_unclassified	Bacteria_unclassified	Bacteria_unclassified	Bacteria_unclassified	Bacteria_unclassified	0.0435815	±	0.00754854	0.0305071	±	0.0210143	0.0435815	±	0.022958	0.056656	±	0.0360043	0.0479397	±	0.022958	0.0610141	±	0.0383047	0.0828049	±	0.0981311	0.0479397	±	0.0329033	0.0610141	±	0.0322474	0.0588351	±	0.0130745	0.0784468	±	0.0113228	0.0828049	±	0.0136083	0.0414025	±	0.00998578	0.0239698	±	0.0247496	0.0631932	±
OTU480	Proteobacteria	Betaproteobacteria	Burkholderiales	Comamonadaceae	Delftia	0.0174326	±	0.0136083	0.00653723	±	1.0623e-18	0.0174326	±	0.00998578	0.00435815	±	0.00754854	0.0544769	±	0.0329033	0.0217908	±	0.0150971	0.0130745	±	0.0130745	0.00653723	±	0.00653723	0.0261489	±	0.0261489	0.0108954	±	0.0136083	0.0174326	±	0.00998578	0.0261489	±	0.0172959	0.028328	±	0.029478	0.0675514	±	0.0617875	0.0174326	±
OTU404	Actinobacteria	Actinobacteria	Acidimicrobiales	Acidimicrobineae_incertae_sedis	Aciditerrimonas	0.0174326	±	0.00377427	0.0348652	±	0.0210143	0.0174326	±	0.0164517	0.0174326	±	0.0199716	0.0501188	±	0.029478	0.0414025	±	0.0210143	0.0305071	±	0.0199716	0.0305071	±	0.022958	0.0893421	±	0.043527	0.0915212	±	0.0588351	0.0675514	±	0.045916	0.0348652	±	0.0210143	0.0610141	±	0.044498	0.0457606	±	0.0299573	0.0653723	±
OTU195	Planctomycetes	Planctomycetia	Planctomycetales	Planctomycetaceae	Gemmata	0.084984	±	0.0397644	0.0522978	±	0.0130745	0.0610141	±	0.043527	0.0522978	±	0.0299573	0.0806258	±	0.0308937	0.0501188	±	0.0420285	0.0305071	±	0.00998578	0.056656	±	0.0136083	0.0588351	±	0.0299573	0.0762677	±	0.00754854	0.0501188	±	0.0322474	0.0544769	±	0.0199716	0.056656	±	0.0272167	0.0239698	±	0.0199716	0.0435815	±
OTU391	Acidobacteria	Acidobacteria_Gp6	Gp6	Gp6_unclassified	Gp6_unclassified	0.0414025	±	0.00754854	0.0631932	±	0.0188714	0.0631932	±	0.0272167	0.0697304	±	0.0335465	0.0479397	±	0.0199716	0.0610141	±	0.0335465	0.0610141	±	0.0272167	0.0544769	±	0.00998578	0.0697304	±	0.0308937	0.0697304	±	0.0360043	0.084984	±	0.0284951	0.0588351	±	0.0113228	0.0435815	±	0.0481867	0.0479397	±	0.00754854	0.0392234	±
OTU244	Actinobacteria	Actinobacteria	Actinomycetales	Micromonosporaceae	Dactylosporangium	0.0610141	±	0.0399431	0.0631932	±	0.00998578	0.084984	±	0.049355	0.0697304	±	0.0210143	0.0631932	±	0.0164517	0.0479397	±	0.00377427	0.0719095	±	0.0235703	0.0653723	±	0.0235703	0.0414025	±	0.0329033	0.0326861	±	0.0299573	0.056656	±	0.0371723	0.0392234	±	0.0130745	0.0326861	±	0.0113228	0.0457606	±	0.00653723	0.028328	±
OTU315	Proteobacteria	Betaproteobacteria	Rhodocyclales	Rhodocyclaceae	Rhodocyclaceae_unclassified	0.0414025	±	0.0164517	0.0828049	±	0.0264199	0.0522978	±	0.0235703	0.0893421	±	0.0817372	0.0588351	±	0.0235703	0.0610141	±	0.0164517	0.0305071	±	0.0360043	0.0588351	±	0.0363978	0.0522978	±	0.0299573	0.0653723	±	0.0471406	0.056656	±	0.0164517	0.0326861	±	0.0196117	0.0588351	±	0.00653723	0.0653723	±	0.0172959	0.0326861	±
OTU529	Acidobacteria	Acidobacteria_Gp6	Gp6	Gp6_unclassified	Gp6_unclassified	0.0610141	±	0.00377427	0.0196117	±	0.0196117	0.0370443	±	0.0136083	0.0610141	±	0.0329033	0.0937003	±	0.0150971	0.0610141	±	0.0272167	0.084984	±	0.040825	0.0806258	±	0.0322474	0.0719095	±	0.0172959	0.0522978	±	0.0130745	0.0784468	±	0.00653723	0.0697304	±	0.0371723	0.0457606	±	0.00653723	0.0392234	±	0.00653723	0.056656	±
OTU139	Candidatus_Saccharibacteria	Candidatus_Saccharibacteria_unclassified	Candidatus_Saccharibacteria_unclassified	Candidatus_Saccharibacteria_unclassified	Candidatus_Saccharibacteria_unclassified	0	±	0	0	±	0	0	±	0	0	±	0	0.0239698	±	0.0136083	0.0239698	±	0.0136083	0.00435815	±	0.00754854	0.0348652	±	0.00998578	0.0893421	±	0.0481867	0.180863	±	0.233548	0.0958794	±	0.0329033	0.108954	±	0.0658067	0.128566	±	0.0863145	0.084984	±	0.0510574	0.111133	±
OTU5335	Firmicutes	Bacilli	Bacillales	Bacillaceae_1	Bacillus	0.0610141	±	0.0335465	0.0828049	±	0.0499289	0.0740886	±	0.0188714	0.0522978	±	0.0363978	0.0435815	±	0.0272167	0.100238	±	0.0164517	0.028328	±	0.0210143	0.0762677	±	0.00754854	0.0544769	±	0.029478	0.0740886	±	0.0383047	0.0414025	±	0.0164517	0.0697304	±	0.0360043	0.0239698	±	0.00998578	0.0501188	±	0.0150971	0.0261489	±
OTU327	Gemmatimonadetes	Gemmatimonadetes	Gemmatimonadales	Gemmatimonadaceae	Gemmatimonas	0.0653723	±	0.0345918	0.0392234	±	0.00653723	0.0457606	±	0.00653723	0.0501188	±	0.029478	0.0326861	±	0.0196117	0.0522978	±	0.0172959	0.0305071	±	0.0329033	0.0653723	±	0.0130745	0.0697304	±	0.0699005	0.0697304	±	0.0199716	0.0653723	±	0.0457606	0.0958794	±	0.0420285	0.0392234	±	0.0299573	0.0326861	±	0.00653723	0.0653723	±
OTU181	Candidatus_Saccharibacteria	Candidatus_Saccharibacteria_unclassified	Candidatus_Saccharibacteria_unclassified	Candidatus_Saccharibacteria_unclassified	Candidatus_Saccharibacteria_unclassified	0	±	0	0	±	0	0	±	0	0	±	0	0	±	0	0	±	0	0	±	0	0.00217908	±	0.00377427	0	±	0	0.00217908	±	0.00377427	0.0108954	±	0.0188714	0.215729	±	0.345732	0.0130745	±	0.0226456	0.0239698	±	0.00754854	0.00653723	±
OTU1129	Proteobacteria	Betaproteobacteria	Burkholderiales	Burkholderiales_unclassified	Burkholderiales_unclassified	0.0610141	±	0.0199716	0.0522978	±	0.0172959	0.0588351	±	0.0284951	0.0719095	±	0.0130745	0.0544769	±	0.0247496	0.0828049	±	0.043527	0.028328	±	0.0199716	0.0457606	±	0.0172959	0.0653723	±	0.0226456	0.0697304	±	0.0188714	0.0653723	±	0.0226456	0.0414025	±	0.0210143	0.0631932	±	0.029478	0.0348652	±	0.0272167	0.0522978	±
OTU326	Proteobacteria	Deltaproteobacteria	Myxococcales	Myxococcales_unclassified	Myxococcales_unclassified	0.0631932	±	0.0264199	0.0828049	±	0.0136083	0.0871631	±	0.0136083	0.113312	±	0.0272167	0.0435815	±	0.0164517	0.0435815	±	0.00998578	0.0305071	±	0.0264199	0.0544769	±	0.0247496	0.0544769	±	0.0136083	0.0392234	±	0.0113228	0.056656	±	0.0264199	0.0544769	±	0.0136083	0.0392234	±	0.0113228	0.0130745	±	0.0113228	0.028328	±
OTU141	Candidatus_Saccharibacteria	Candidatus_Saccharibacteria_unclassified	Candidatus_Saccharibacteria_unclassified	Candidatus_Saccharibacteria_unclassified	Candidatus_Saccharibacteria_unclassified	0	±	0	0	±	0	0	±	0	0.00217908	±	0.00377427	0	±	0	0.00217908	±	0.00377427	0.00653723	±	0.0113228	0.00435815	±	0.00377427	0.00653723	±	0.00653723	0.113312	±	0.0989982	0.183042	±	0.209701	0.0784468	±	0.0397644	0.0217908	±	0.0199716	0.0653723	±	0.113228	0.0915212	±
OTU624	Actinobacteria	Actinobacteria	Acidimicrobiales	Acidimicrobiaceae	Ilumatobacter	0.0610141	±	0.0272167	0.0653723	±	0	0.0697304	±	0.00377427	0.102417	±	0.0329033	0.0740886	±	0.0247496	0.0479397	±	0.0264199	0.0501188	±	0.0264199	0.0305071	±	0.0188714	0.0522978	±	0.00653723	0.0457606	±	0.0235703	0.0501188	±	0.0247496	0.0370443	±	0.00754854	0.0392234	±	0.00653723	0.0392234	±	0.00653723	0.0588351	±
OTU13208	Actinobacteria	Actinobacteria	Actinomycetales	Streptomycetaceae	Streptomyces	0.0457606	±	0.0196117	0.0479397	±	0.029478	0.0631932	±	0.0360043	0.084984	±	0.0172959	0.0653723	±	0.0196117	0.0719095	±	0.0113228	0.0326861	±	0.0113228	0.0610141	±	0.022958	0.0414025	±	0.0199716	0.0457606	±	0.0345918	0.0653723	±	0.0299573	0.0435815	±	0.029478	0.0588351	±	0.0284951	0.0457606	±	0.0196117	0.0588351	±
OTU243	Bacteria_unclassified	Bacteria_unclassified	Bacteria_unclassified	Bacteria_unclassified	Bacteria_unclassified	0.0871631	±	0.0301942	0.056656	±	0.0164517	0.0392234	±	0.0235703	0.0915212	±	0.0172959	0.056656	±	0.0272167	0.0784468	±	0.0742487	0.0522978	±	0.0397644	0.0435815	±	0.0164517	0.0522978	±	0.0226456	0.0610141	±	0.00377427	0.0501188	±	0.0472915	0.0980584	±	0.0172959	0.0479397	±	0.022958	0.0239698	±	0.0188714	0.028328	±
OTU452	Planctomycetes	Planctomycetia	Planctomycetales	Planctomycetaceae	Pirellula	0.0326861	±	0.0130745	0.028328	±	0.00754854	0.0217908	±	0.00998578	0.0435815	±	0.0264199	0.0435815	±	0.0210143	0.0435815	±	0.0272167	0.0435815	±	0.0360043	0.0457606	±	0.0130745	0.0414025	±	0.0136083	0.0414025	±	0.00998578	0.0392234	±	0.0130745	0.0501188	±	0.0335465	0.0370443	±	0.0272167	0.028328	±	0.0164517	0.0806258	±
OTU291	Verrucomicrobia	Subdivision3	Subdivision3_unclassified	Subdivision3_unclassified	Subdivision3_unclassified	0.056656	±	0.0329033	0.056656	±	0.0264199	0.0457606	±	0.0130745	0.028328	±	0.00998578	0.0414025	±	0.0199716	0.0457606	±	0.0284951	0.0217908	±	0.0150971	0.0653723	±	0.049355	0.0806258	±	0.0670929	0.0653723	±	0.0261489	0.0522978	±	0.0339684	0.0610141	±	0.0247496	0.0326861	±	0.0172959	0.0196117	±	0.0130745	0.0326861	±
OTU1236	Actinobacteria	Actinobacteria	Actinomycetales	Mycobacteriaceae	Mycobacterium	0.0130745	±	0.00653723	0.0152535	±	0.0210143	0.0305071	±	0.0164517	0.0261489	±	0.0261489	0.0697304	±	0.0150971	0.0414025	±	0.0199716	0.0457606	±	0.0345918	0.0435815	±	0.00377427	0.0501188	±	0.0472915	0.0435815	±	0.00377427	0.0457606	±	0.0130745	0.028328	±	0.0164517	0.0479397	±	0.043527	0.0588351	±	0.0284951	0.028328	±
OTU783	Actinobacteria	Actinobacteria	Actinomycetales	Pseudonocardiaceae	Pseudonocardia	0.0479397	±	0.0329033	0.0392234	±	0.0226456	0.0370443	±	0.00998578	0.0806258	±	0.00754854	0.0370443	±	0.00998578	0.0479397	±	0.0150971	0.0501188	±	0.0247496	0.0370443	±	0.0308937	0.0479397	±	0.00998578	0.0631932	±	0.00998578	0.0414025	±	0.044498	0.0435815	±	0.0371723	0.0479397	±	0.0490655	0.0501188	±	0.0272167	0.0348652	±
OTU144	Candidatus_Saccharibacteria	Candidatus_Saccharibacteria_unclassified	Candidatus_Saccharibacteria_unclassified	Candidatus_Saccharibacteria_unclassified	Candidatus_Saccharibacteria_unclassified	0.056656	±	0.0150971	0.0348652	±	0.0264199	0.028328	±	0.029478	0.0762677	±	0.0571151	0.0871631	±	0.0785375	0.0871631	±	0.094583	0.0762677	±	0.0752018	0.14164	±	0.0150971	0.0392234	±	0.0518877	0.0348652	±	0.043527	0.0239698	±	0.00754854	0.0871631	±	0.029478	0.0326861	±	0.0457606	0.0152535	±	0.00754854	0.0217908	±
OTU750	Planctomycetes	Planctomycetia	Planctomycetales	Planctomycetaceae	Planctomycetaceae_unclassified	0.0544769	±	0.0308937	0.028328	±	0.0150971	0.0370443	±	0.0301942	0.0217908	±	0.00754854	0.0414025	±	0.0150971	0.0370443	±	0.022958	0.0522978	±	0.0172959	0.0588351	±	0.0172959	0.0392234	±	0.0113228	0.0610141	±	0.0425339	0.0392234	±	0.0172959	0.0762677	±	0.0247496	0.0348652	±	0.0136083	0.0457606	±	0.0172959	0.056656	±
OTU618	Proteobacteria	Alphaproteobacteria	Sphingomonadales	Sphingomonadaceae	Sphingomonas	0.0522978	±	0.0326861	0.0435815	±	0.0210143	0.0435815	±	0.0150971	0.0610141	±	0.0210143	0.0697304	±	0.0499289	0.0784468	±	0.0113228	0.0501188	±	0.0150971	0.0392234	±	0.0172959	0.0370443	±	0.022958	0.0326861	±	0.0196117	0.0261489	±	0.0196117	0.0435815	±	0.00754854	0.0501188	±	0.0164517	0.0675514	±	0.022958	0.0435815	±
OTU180	Actinobacteria	Actinobacteria	Actinomycetales	Nakamurellaceae	Nakamurella	0.0435815	±	0.00998578	0.0501188	±	0.0425339	0.056656	±	0.0585924	0.0457606	±	0.0226456	0.0501188	±	0.0371723	0.0457606	±	0.0326861	0.0588351	±	0.0235703	0.0719095	±	0.0397644	0.0522978	±	0.0172959	0.0370443	±	0.0188714	0.0239698	±	0.00998578	0.0305071	±	0.0136083	0.0217908	±	0.00998578	0.0522978	±	0.0581042	0.0457606	±
OTU182	Acidobacteria	Acidobacteria_Gp4	Aridibacter	Aridibacter_unclassified	Aridibacter_unclassified	0.0326861	±	0.0235703	0.0414025	±	0.0322474	0.0174326	±	0.00754854	0.0305071	±	0.0164517	0.0457606	±	0.0235703	0.0653723	±	0.0339684	0.0893421	±	0.0210143	0.0588351	±	0.0261489	0.0501188	±	0.0264199	0.0326861	±	0.0172959	0.0653723	±	0.0339684	0.028328	±	0.0164517	0.0610141	±	0.00377427	0.0653723	±	0.0299573	0.0326861	±
OTU248	Proteobacteria	Betaproteobacteria	Betaproteobacteria_unclassified	Betaproteobacteria_unclassified	Betaproteobacteria_unclassified	0.0414025	±	0.0210143	0.0501188	±	0.0264199	0.0435815	±	0.0247496	0.0305071	±	0.0188714	0.0457606	±	0.0130745	0.0414025	±	0.00998578	0.0762677	±	0.0264199	0.0697304	±	0.0210143	0.0675514	±	0.0308937	0.0326861	±	0.00653723	0.0588351	±	0.00653723	0.0457606	±	0.0113228	0.0414025	±	0.0188714	0.0479397	±	0.0247496	0.0501188	±
OTU172	Actinobacteria	Actinobacteria	Actinomycetales	Pseudonocardiaceae	Allokutzneria	0.0348652	±	0.0150971	0.028328	±	0.0210143	0.0196117	±	0.0196117	0.0261489	±	0.0235703	0.0980584	±	0.0235703	0.0893421	±	0.0670929	0.084984	±	0.049355	0.0740886	±	0.0272167	0.0610141	±	0.022958	0.0653723	±	0.0803308	0.100238	±	0.083034	0.0326861	±	0.0130745	0.0348652	±	0.00377427	0.0261489	±	0.0196117	0.0501188	±
OTU371	Proteobacteria	Alphaproteobacteria	Rhodospirillales	Reyranella	Reyranella_unclassified	0.0697304	±	0.0188714	0.0370443	±	0.00998578	0.0501188	±	0.0699005	0.056656	±	0.00998578	0.0348652	±	0.0247496	0.0522978	±	0.00653723	0.0457606	±	0.00653723	0.0348652	±	0.00377427	0.0653723	±	0.0235703	0.056656	±	0.0247496	0.0631932	±	0.00377427	0.0501188	±	0.0199716	0.0326861	±	0.0172959	0.0479397	±	0.0210143	0.0653723	±
OTU775	Acidobacteria	Acidobacteria_Gp6	Gp6	Gp6_unclassified	Gp6_unclassified	0.0392234	±	0.0284951	0.0588351	±	0.0261489	0.0544769	±	0.0136083	0.0631932	±	0.00377427	0.0610141	±	0.0210143	0.0501188	±	0.0150971	0.0588351	±	0.0428675	0.0544769	±	0.00998578	0.0653723	±	0.0261489	0.0631932	±	0.0335465	0.0479397	±	0.0301942	0.0326861	±	0.0172959	0.0305071	±	0.00754854	0.0348652	±	0.0272167	0.0631932	±
OTU392	Actinobacteria	Actinobacteria	Acidimicrobiales	Acidimicrobiales_unclassified	Acidimicrobiales_unclassified	0.143819	±	0.118934	0.0544769	±	0.0720085	0.0479397	±	0.0774416	0.0544769	±	0.0499289	0.0196117	±	0.0113228	0.056656	±	0.0264199	0.0152535	±	0.0210143	0.00435815	±	0.00754854	0.0479397	±	0.0360043	0.0392234	±	0.0457606	0.028328	±	0.0322474	0.0130745	±	0.0172959	0.100238	±	0.0490655	0.124207	±	0.068874	0.0348652	±
OTU692	Proteobacteria	Alphaproteobacteria	Rhizobiales	Hyphomicrobiaceae	Devosia	0.056656	±	0.0199716	0.0457606	±	0.00653723	0.0305071	±	0.00377427	0.0588351	±	0.0326861	0.0348652	±	0.0136083	0.0631932	±	0.0335465	0.0588351	±	0.0172959	0.0501188	±	0.0150971	0.0326861	±	0.00653723	0.0457606	±	0.0113228	0.056656	±	0.029478	0.0392234	±	0.0172959	0.0457606	±	8.49837e-18	0.0261489	±	0.0172959	0.0435815	±
OTU387	Acidobacteria	Acidobacteria_Gp7	Gp7	Gp7_unclassified	Gp7_unclassified	0.0217908	±	0.00998578	0.0217908	±	0.00998578	0.0217908	±	0.0322474	0.00871631	±	0.00998578	0.0740886	±	0.0548245	0.0631932	±	0.0264199	0.0435815	±	0.00754854	0.0588351	±	0.0643842	0.0675514	±	0.0360043	0.0719095	±	0.0569902	0.0414025	±	0.00377427	0.0740886	±	0.0199716	0.0457606	±	0.0261489	0.0610141	±	0.0394045	0.0392234	±
OTU166	Acidobacteria	Acidobacteria_Gp1	Gp1	Gp1_unclassified	Gp1_unclassified	0.0697304	±	0.0136083	0.0610141	±	0.0199716	0.0479397	±	0.0210143	0.0544769	±	0.00998578	0.0501188	±	0.029478	0.0435815	±	0.00998578	0.0588351	±	0.040825	0.0326861	±	0.0172959	0.0305071	±	0.0164517	0.0937003	±	0.029478	0.0196117	±	0.0172959	0.028328	±	0.0136083	0.0326861	±	0.00653723	0.028328	±	0.0136083	0.0501188	±
OTU161	Bacteroidetes	Sphingobacteriia	Sphingobacteriales	Chitinophagaceae	Flavihumibacter	0.0370443	±	0.029478	0.0871631	±	0.0490655	0.0675514	±	0.0164517	0.0414025	±	0.00377427	0.0631932	±	0.0360043	0.0501188	±	0.0210143	0.0588351	±	0.0345918	0.0217908	±	0.0199716	0.028328	±	0.0210143	0.0435815	±	0.0210143	0.0261489	±	0.0130745	0.0414025	±	0.0272167	0.0544769	±	0.0383047	0.0501188	±	0.0360043	0.0501188	±
OTU272	Verrucomicrobia	Spartobacteria	Spartobacteria_unclassified	Spartobacteria_unclassified	Spartobacteria_unclassified	0.0261489	±	0.00653723	0.0217908	±	0.0199716	0.0479397	±	0.00998578	0.028328	±	0.0150971	0.0305071	±	0.00754854	0.0392234	±	0.0299573	0.0305071	±	0.00377427	0.028328	±	0.00998578	0.0479397	±	0.022958	0.0392234	±	0.00653723	0.0501188	±	0.00998578	0.0610141	±	0.046379	0.0457606	±	0.0326861	0.0501188	±	0.0136083	0.0457606	±
OTU165	Bacteria_unclassified	Bacteria_unclassified	Bacteria_unclassified	Bacteria_unclassified	Bacteria_unclassified	0.0435815	±	0.0481867	0.0239698	±	0.00754854	0.028328	±	0.0210143	0.0479397	±	0.00998578	0.0239698	±	0.0247496	0.0414025	±	0.0383047	0.0501188	±	0.0164517	0.0348652	±	0.00754854	0.0414025	±	0.0490655	0.0719095	±	0.00653723	0.0937003	±	0.0699005	0.0784468	±	0.0397644	0.0435815	±	0.00998578	0.0326861	±	0.0363978	0.0501188	±
OTU169	Acidobacteria	Acidobacteria_Gp3	Gp3	Gp3_unclassified	Gp3_unclassified	0.0588351	±	0.0196117	0.0479397	±	0.0164517	0.0479397	±	0.0301942	0.0871631	±	0.0425339	0.056656	±	0.0360043	0.0631932	±	0.0247496	0.0457606	±	0.0235703	0.0893421	±	0.0472915	0.0457606	±	0.00653723	0.0414025	±	0.0264199	0.0370443	±	0.0210143	0.056656	±	0.0150971	0.0305071	±	0.00998578	0.0544769	±	0.0264199	0.0326861	±
OTU162	Planctomycetes	Planctomycetia	Planctomycetales	Planctomycetaceae	Zavarzinella	0.0435815	±	0.0136083	0.0239698	±	0.00754854	0.0174326	±	0.0164517	0.0370443	±	0.0164517	0.0501188	±	0.0188714	0.0479397	±	0.0136083	0.0435815	±	0.00998578	0.0893421	±	0.0563619	0.0544769	±	0.0308937	0.0610141	±	0.00377427	0.0653723	±	0.0428675	0.0305071	±	0.00998578	0.0108954	±	0.00998578	0.0261489	±	0.0172959	0.0522978	±
OTU552	Proteobacteria	Betaproteobacteria	Burkholderiales	Oxalobacteraceae	Pseudoduganella	0.00217908	±	0.00377427	0.00217908	±	0.00377427	0	±	0	0.00217908	±	0.00377427	0.0762677	±	0.0399431	0.0784468	±	0.0339684	0.0828049	±	0.0680416	0.0239698	±	0.0136083	0.028328	±	0.0164517	0.0174326	±	0.00377427	0.0174326	±	0.0188714	0.0130745	±	0.0172959	0.100238	±	0.13498	0.0631932	±	0.0524339	0.0239698	±
OTU3301	Proteobacteria	Gammaproteobacteria	Pseudomonadales	Pseudomonadaceae	Pseudomonas	0	±	0	0.0130745	±	2.12459e-18	0.00653723	±	0.00653723	0.00217908	±	0.00377427	0.0653723	±	0.0653723	0.0915212	±	0.0962994	0.278922	±	0.261925	0.0196117	±	0.0113228	0.0130745	±	0.0130745	0.0261489	±	0.0226456	0.0174326	±	0.0301942	0	±	0	0.0152535	±	0.0150971	0.0239698	±	0.0308937	0	±
OTU175	Bacteria_unclassified	Bacteria_unclassified	Bacteria_unclassified	Bacteria_unclassified	Bacteria_unclassified	0.0392234	±	0.0113228	0.0457606	±	0.0196117	0.0239698	±	0.022958	0.0326861	±	0.0172959	0.0522978	±	0.0130745	0.0522978	±	0.0392234	0.0719095	±	0.0235703	0.0937003	±	0.00377427	0.0697304	±	0.0136083	0.0522978	±	0.0130745	0.0457606	±	0.0113228	0.0697304	±	0.022958	0.0174326	±	0.00998578	0.0217908	±	0.00377427	0.0305071	±
OTU210	Verrucomicrobia	Subdivision3	Subdivision3_unclassified	Subdivision3_unclassified	Subdivision3_unclassified	0.0326861	±	0.00653723	0.0152535	±	0.0210143	0.0544769	±	0.0329033	0.0544769	±	0.029478	0.0457606	±	0.0471406	0.0392234	±	0.0172959	0.0261489	±	0.00653723	0.056656	±	0.0420285	0.0631932	±	0.0754854	0.0588351	±	0.0299573	0.0653723	±	0.0345918	0.0501188	±	0.0188714	0.0479397	±	0.0199716	0.0326861	±	0.0172959	0.0217908	±
OTU204	Acidobacteria	Acidobacteria_Gp10	Gp10	Gp10_unclassified	Gp10_unclassified	0.0610141	±	0.0199716	0.0719095	±	0.0113228	0.0653723	±	0.0130745	0.0806258	±	0.0301942	0.0239698	±	0.0136083	0.0370443	±	0.0360043	0.0217908	±	0.022958	0.0217908	±	0.00998578	0.0305071	±	0.0210143	0.0653723	±	0.0363978	0.0348652	±	0.0188714	0.056656	±	0.0164517	0.0435815	±	0.0272167	0.0392234	±	0.0226456	0.0675514	±
OTU400	Actinobacteria	Actinobacteria	Gaiellales	Gaiellaceae	Gaiella	0.0915212	±	0.0172959	0.0588351	±	0.0113228	0.0871631	±	0.0264199	0.0544769	±	0.0136083	0.0174326	±	0.0150971	0.0348652	±	0.0150971	0.0479397	±	0.0188714	0.0522978	±	0.0452913	0.0370443	±	0.0247496	0.0457606	±	0.0397644	0.0414025	±	0.029478	0.0435815	±	0.0199716	0.0261489	±	0.00653723	0.0239698	±	0.00998578	0.0457606	±
OTU398	Planctomycetes	Planctomycetia	Planctomycetales	Planctomycetaceae	Planctomycetaceae_unclassified	0.0435815	±	0.00754854	0.0414025	±	0.00998578	0.0414025	±	0.0264199	0.0370443	±	0.00998578	0.0326861	±	0.00653723	0.0784468	±	0.0599147	0.0544769	±	0.0490655	0.0631932	±	0.0136083	0.0479397	±	0.0371723	0.0501188	±	0.00754854	0.0217908	±	0.0136083	0.0435815	±	0.0136083	0.0370443	±	0.00377427	0.0348652	±	0.0199716	0.0414025	±
OTU283	Candidatus_Saccharibacteria	Candidatus_Saccharibacteria_unclassified	Candidatus_Saccharibacteria_unclassified	Candidatus_Saccharibacteria_unclassified	Candidatus_Saccharibacteria_unclassified	0.028328	±	0.00377427	0.0392234	±	0.0130745	0.0740886	±	0.0164517	0.0588351	±	0.0326861	0.0653723	±	0.0428675	0.0348652	±	0.00998578	0.0871631	±	0.0308937	0.0261489	±	0.0113228	0.0588351	±	0.0345918	0.0653723	±	0	0.0457606	±	0.0428675	0.0653723	±	0.040825	0.0370443	±	0.0199716	0.0392234	±	0.0235703	0.0457606	±
OTU609	Proteobacteria	Betaproteobacteria	Methylophilales	Methylophilaceae	Methylophilaceae_unclassified	0.0392234	±	0.0130745	0.0610141	±	0.0360043	0.0196117	±	0.0172959	0.0152535	±	0.0136083	0.0479397	±	0.0548245	0.0653723	±	0.0226456	0.0653723	±	0.0235703	0.0457606	±	0.0130745	0.056656	±	0.0528398	0.0457606	±	0.0226456	0.0479397	±	0.0210143	0.056656	±	0.0399431	0.0348652	±	0.0199716	0.0370443	±	0.0272167	0.0370443	±
OTU600	Proteobacteria	Alphaproteobacteria	Rhodospirillales	Rhodospirillales_unclassified	Rhodospirillales_unclassified	0.0501188	±	0.0247496	0.0392234	±	0.0363978	0.056656	±	0.0247496	0.0784468	±	0.0172959	0.0414025	±	0.0329033	0.0653723	±	0.0113228	0.0239698	±	0.00998578	0.0522978	±	0.0284951	0.0501188	±	0.022958	0.0457606	±	0.0172959	0.0392234	±	0.0172959	0.0631932	±	0.0420285	0.0370443	±	0.0188714	0.0196117	±	0.0172959	0.0326861	±
OTU307	Bacteria_unclassified	Bacteria_unclassified	Bacteria_unclassified	Bacteria_unclassified	Bacteria_unclassified	0.0370443	±	0.0264199	0.0370443	±	0.0188714	0.0522978	±	0.0284951	0.0239698	±	0.00754854	0.0305071	±	0.0420285	0.0544769	±	0.0150971	0.0522978	±	0.0397644	0.0544769	±	0.0164517	0.0457606	±	0.0113228	0.0435815	±	0.0136083	0.0305071	±	0.00377427	0.0522978	±	0.0113228	0.0414025	±	0.0264199	0.056656	±	0.0272167	0.0828049	±
OTU709	Proteobacteria	Deltaproteobacteria	Myxococcales	Cystobacteraceae	Anaeromyxobacter	0.0653723	±	0.0428675	0.0697304	±	0.0499289	0.113312	±	0.0360043	0.0610141	±	0.022958	0.0305071	±	0.0247496	0.0653723	±	0.0284951	0.0544769	±	0.0199716	0.0348652	±	0.0136083	0.0326861	±	0.0113228	0.0653723	±	0.0113228	0.0435815	±	0.0308937	0.0675514	±	0.0308937	0.0326861	±	0.0113228	0.0435815	±	0.022958	0.0305071	±
OTU426	Proteobacteria	Gammaproteobacteria	Chromatiales	Chromatiales_unclassified	Chromatiales_unclassified	0.0784468	±	0.0581042	0.0414025	±	0.0360043	0.0871631	±	0.118635	0.0544769	±	0.029478	0.0501188	±	0.0360043	0.0152535	±	0.00377427	0.0326861	±	0.0284951	0.0871631	±	0.0806847	0.00653723	±	0.00653723	0.00871631	±	0.00377427	0.0653723	±	0.0326861	0.028328	±	0.0150971	0.104596	±	0.114914	0.0196117	±	0.00653723	0.056656	±
OTU174	Latescibacteria	Latescibacteria_unclassified	Latescibacteria_unclassified	Latescibacteria_unclassified	Latescibacteria_unclassified	0.0806258	±	0.0150971	0.028328	±	0.0136083	0.0740886	±	0.0188714	0.056656	±	0.0199716	0.0239698	±	0.00998578	0.0479397	±	0.0329033	0.0348652	±	0.0247496	0.0348652	±	0.0272167	0.0348652	±	0.0399431	0.0610141	±	0.0360043	0.0479397	±	0.0308937	0.0719095	±	0.0172959	0.0414025	±	0.0322474	0.0348652	±	0.00377427	0.0196117	±
OTU395	Acidobacteria	Acidobacteria_Gp10	Gp10	Gp10_unclassified	Gp10_unclassified	0.0457606	±	0.00653723	0.028328	±	0.0247496	0.028328	±	0.00998578	0.0435815	±	0.0247496	0.0522978	±	0.0172959	0.056656	±	0.0394045	0.0152535	±	0.00998578	0.0457606	±	0.0113228	0.167789	±	0.119174	0.0392234	±	0.0113228	0.0457606	±	0.0113228	0.0305071	±	0.00998578	0.0479397	±	0.0136083	0.0522978	±	0.0172959	0.0370443	±
OTU632	Proteobacteria	Betaproteobacteria	Burkholderiales	Oxalobacteraceae	Janthinobacterium	0.111133	±	0.00653723	0.122028	±	0.0571151	0.124207	±	0.0457606	0.113312	±	0.0264199	0.056656	±	0.00998578	0.0675514	±	0.0308937	0.0479397	±	0.0136083	0.0130745	±	0.0130745	0.0479397	±	0.0548245	0.0544769	±	0.0301942	0.0435815	±	0.0199716	0.0152535	±	0.00754854	0.0697304	±	0.0544333	0.0370443	±	0.0247496	0.0174326	±
OTU235	Gemmatimonadetes	Gemmatimonadetes	Gemmatimonadales	Gemmatimonadaceae	Gemmatimonas	0.0501188	±	0.0188714	0.0762677	±	0.00998578	0.0675514	±	0.0210143	0.0653723	±	0.0172959	0.111133	±	0.0261489	0.0479397	±	0.0164517	0.0588351	±	0.0261489	0.056656	±	0.00998578	0.028328	±	0.00754854	0.0435815	±	0.022958	0.0370443	±	0.0136083	0.0435815	±	0.0210143	0.0392234	±	0.0196117	0.028328	±	0.0247496	0.0348652	±
OTU557	Proteobacteria	Betaproteobacteria	Betaproteobacteria_unclassified	Betaproteobacteria_unclassified	Betaproteobacteria_unclassified	0.0588351	±	0.00653723	0.0675514	±	0.0247496	0.0697304	±	0.00377427	0.0305071	±	0.0199716	0.0653723	±	0.0558541	0.0414025	±	0.00377427	0.0348652	±	0.0494991	0.0479397	±	0.0360043	0.0305071	±	0.00998578	0.0610141	±	0.0548245	0.0522978	±	0.0172959	0.0610141	±	0.0308937	0.0370443	±	0.0164517	0.0196117	±	0.0172959	0.00435815	±
OTU205	Acidobacteria	Acidobacteria_Gp6	Gp6	Gp6_unclassified	Gp6_unclassified	0.0479397	±	0.0308937	0.0414025	±	0.0247496	0.0522978	±	0.0172959	0.0479397	±	0.022958	0.0457606	±	0.00653723	0.0348652	±	0.029478	0.0305071	±	0.0308937	0.0588351	±	0.0235703	0.100238	±	0.0571151	0.0653723	±	0.0510574	0.0588351	±	0.0363978	0.0370443	±	0.00377427	0.0305071	±	0.00998578	0.0305071	±	0.0199716	0.0370443	±
OTU673	Gemmatimonadetes	Gemmatimonadetes	Gemmatimonadales	Gemmatimonadaceae	Gemmatimonas	0.0675514	±	0.0264199	0.0544769	±	0.0399431	0.108954	±	0.0585924	0.0893421	±	0.043527	0.0414025	±	0.0322474	0.0392234	±	0	0.0326861	±	0.040825	0.0370443	±	0.00998578	0.0392234	±	0.0345918	0.0631932	±	0.0593173	0.028328	±	0.0272167	0.0326861	±	0.00653723	0.0239698	±	0.00754854	0.0414025	±	0.00754854	0.0392234	±
OTU1049	Proteobacteria	Gammaproteobacteria	Gammaproteobacteria_unclassified	Gammaproteobacteria_unclassified	Gammaproteobacteria_unclassified	0.0370443	±	0.0136083	0.0588351	±	0.0299573	0.0457606	±	0.0235703	0.056656	±	0.0247496	0.0457606	±	0.0172959	0.0588351	±	0.0130745	0.0457606	±	0.0299573	0.0522978	±	0.0299573	0.0631932	±	0.0394045	0.0522978	±	0.0172959	0.056656	±	0.0555985	0.0457606	±	0.0235703	0.0174326	±	0.00754854	0.0305071	±	0.00998578	0.0261489	±
OTU416	Chloroflexi	Thermomicrobia	Sphaerobacterales	Sphaerobacteraceae	Sphaerobacteraceae_unclassified	0.0370443	±	0.0532426	0.0348652	±	0.00754854	0.0435815	±	0.0164517	0.0588351	±	0.0172959	0.0631932	±	0.0264199	0.0588351	±	0.0339684	0.106775	±	0.0150971	0.0740886	±	0.0264199	0.0435815	±	0.0420285	0.0653723	±	0.0261489	0.0479397	±	0.0383047	0.0305071	±	0.00998578	0.028328	±	0.0136083	0.0348652	±	0.0377427	0.0305071	±
OTU220	Proteobacteria	Proteobacteria_unclassified	Proteobacteria_unclassified	Proteobacteria_unclassified	Proteobacteria_unclassified	0.0261489	±	0.0113228	0.0217908	±	0.00998578	0.0414025	±	0.0150971	0.0196117	±	0.0130745	0.0501188	±	0.0264199	0.0370443	±	0.0136083	0.0326861	±	0.0113228	0.0588351	±	0.0457606	0.0806258	±	0.0150971	0.0392234	±	0.00653723	0.0762677	±	0.0571151	0.0414025	±	0.0264199	0.0610141	±	0.0360043	0.0370443	±	0.0264199	0.0544769	±
OTU5376	Actinobacteria	Actinobacteria	Actinomycetales	Actinomycetales_unclassified	Actinomycetales_unclassified	0.0370443	±	0.022958	0.0522978	±	0.0172959	0.0414025	±	0.0199716	0.0457606	±	0.0339684	0.0435815	±	0.029478	0.0435815	±	0.0335465	0.0217908	±	0.00754854	0.028328	±	0.0199716	0.0370443	±	0.0199716	0.0348652	±	0.0136083	0.0457606	±	0.0113228	0.0392234	±	0.0235703	0.0501188	±	0.0199716	0.0522978	±	0.0284951	0.0457606	±
OTU705	Proteobacteria	Gammaproteobacteria	Pseudomonadales	Pseudomonadaceae	Pseudomonas	0.00217908	±	0.00377427	0.00217908	±	0.00377427	0	±	0	0.00435815	±	0.00754854	0.100238	±	0.0394045	0.100238	±	0.0420285	0.209191	±	0.135085	0.0479397	±	0.0322474	0.0108954	±	0.0188714	0.0152535	±	0.0210143	0.0348652	±	0.0494991	0.0130745	±	0.0226456	0.0152535	±	0.0264199	0.00871631	±	0.00377427	0.00217908	±
OTU200	Proteobacteria	Deltaproteobacteria	Myxococcales	Sandaracinaceae	Sandaracinus	0.0196117	±	0.0172959	0.0130745	±	0.00653723	0.028328	±	0.0322474	0.0152535	±	0.00377427	0.0631932	±	0.0272167	0.0588351	±	0.0172959	0.111133	±	0.0172959	0.0719095	±	0.0397644	0.0675514	±	0.0136083	0.0457606	±	0.0299573	0.0631932	±	0.0164517	0.0152535	±	0.00377427	0.0326861	±	0.0130745	0.0392234	±	0	0.0762677	±
OTU458	Proteobacteria	Betaproteobacteria	Betaproteobacteria_unclassified	Betaproteobacteria_unclassified	Betaproteobacteria_unclassified	0.056656	±	0.0472915	0.0675514	±	0.0264199	0.0653723	±	0.0535095	0.0675514	±	0.022958	0.0217908	±	0.00998578	0.056656	±	0.0425339	0.0196117	±	0.0235703	0.0217908	±	0.00377427	0.0522978	±	0.0299573	0.0893421	±	0.0264199	0.0479397	±	0.0371723	0.056656	±	0.0371723	0.0392234	±	0.0235703	0.0414025	±	0.00754854	0.0370443	±
OTU607	Planctomycetes	Planctomycetia	Planctomycetales	Planctomycetaceae	Pirellula	0.0348652	±	0.0164517	0.0392234	±	0.00653723	0.0326861	±	0.0196117	0.0217908	±	0.00998578	0.0653723	±	0.0284951	0.0740886	±	0.0322474	0.0414025	±	0.00377427	0.0631932	±	0.0272167	0.0435815	±	0.00377427	0.0414025	±	0.0164517	0.0392234	±	0.0235703	0.0588351	±	0.0299573	0.0479397	±	0.0247496	0.0370443	±	0.0164517	0.0457606	±
OTU198	Chloroflexi	Caldilineae	Caldilineales	Caldilineaceae	Litorilinea	0.0261489	±	0.0226456	0.0261489	±	0.00653723	0.0196117	±	0.0172959	0.0174326	±	0.00377427	0.056656	±	0.00754854	0.0326861	±	0.00653723	0.0740886	±	0.0507776	0.0522978	±	0.0172959	0.0457606	±	0.0235703	0.0348652	±	0.0210143	0.0762677	±	0.0322474	0.0457606	±	0.0172959	0.0305071	±	0.0247496	0.0457606	±	0.0235703	0.0501188	±
OTU646	Proteobacteria	Betaproteobacteria	Nitrosomonadales	Nitrosomonadaceae	Nitrosospira	0.0610141	±	0.0164517	0.0675514	±	0.029478	0.0806258	±	0.0272167	0.0479397	±	0.0301942	0.0479397	±	0.0210143	0.0348652	±	0.0272167	0.0370443	±	0.0264199	0.0414025	±	0.0164517	0.0457606	±	0.0326861	0.0631932	±	0.0499289	0.0305071	±	0.0301942	0.0261489	±	0.00653723	0.0196117	±	0.00653723	0.0217908	±	0.0164517	0.0522978	±
OTU232	Planctomycetes	Planctomycetia	Planctomycetales	Planctomycetaceae	Planctomycetaceae_unclassified	0.028328	±	0.00754854	0.00871631	±	0.00998578	0.0348652	±	0.0335465	0.0392234	±	0.0235703	0.0326861	±	0.0113228	0.0479397	±	0.00998578	0.0261489	±	0.0345918	0.0370443	±	0.0136083	0.0501188	±	0.0150971	0.0610141	±	0.0210143	0.0522978	±	0.0471406	0.0522978	±	0.0345918	0.0326861	±	0.0172959	0.0457606	±	0.0397644	0.0370443	±
OTU203	Verrucomicrobia	Verrucomicrobiae	Verrucomicrobiales	Verrucomicrobiaceae	Verrucomicrobium	0.0108954	±	0.00998578	0.00435815	±	0.00377427	0.0130745	±	0.0130745	0.0108954	±	0.0136083	0.00217908	±	0.00377427	0.0196117	±	0.0235703	0.00217908	±	0.00377427	0.00871631	±	0.0150971	0.00871631	±	0.00998578	0.0108954	±	0.00377427	0.0239698	±	0.0210143	0.0501188	±	0.0301942	0.0675514	±	0.0621323	0.0414025	±	0.0555985	0.0326861	±
OTU267	Chloroflexi	Anaerolineae	Anaerolineales	Anaerolineaceae	Anaerolineaceae_unclassified	0.0740886	±	0.0199716	0.028328	±	0.00998578	0.0588351	±	0.0235703	0.0457606	±	0.0196117	0.0544769	±	0.0188714	0.0435815	±	0.0164517	0.0174326	±	0.0164517	0.0806258	±	0.0571151	0.0348652	±	0.0164517	0.0522978	±	0.0196117	0.0392234	±	0.00653723	0.0631932	±	0.0705092	0.0414025	±	0.029478	0.0261489	±	0.00653723	0.0370443	±
OTU417	Acidobacteria	Acidobacteria_Gp6	Gp6	Gp6_unclassified	Gp6_unclassified	0.0261489	±	0.0113228	0.00871631	±	0.00754854	0.0174326	±	0.00998578	0.0435815	±	0.0532426	0.0675514	±	0.0308937	0.0697304	±	0.00377427	0.0762677	±	0.0308937	0.0697304	±	0.0329033	0.0457606	±	0.0284951	0.0348652	±	0.0164517	0.0479397	±	0.0188714	0.0457606	±	0.0326861	0.0326861	±	0.0363978	0.0457606	±	0.00653723	0.056656	±
OTU656	Acidobacteria	Acidobacteria_Gp10	Gp10	Gp10_unclassified	Gp10_unclassified	0.0305071	±	0.0150971	0.0217908	±	0.0150971	0.0152535	±	0.00754854	0.0457606	±	0.0113228	0.0631932	±	0.00754854	0.0392234	±	0.0363978	0.0762677	±	0.0532426	0.0305071	±	0.0199716	0.0501188	±	0.0490655	0.0305071	±	0.0150971	0.0631932	±	0.0164517	0.0370443	±	0.0264199	0.0784468	±	0.0261489	0.0217908	±	0.0150971	0.0871631	±
OTU247	Proteobacteria	Deltaproteobacteria	Myxococcales	Kofleriaceae	Kofleria	0.0348652	±	0.0136083	0.0435815	±	0.0199716	0.0414025	±	0.0272167	0.0522978	±	0.0235703	0.028328	±	0.00998578	0.0217908	±	0.00377427	0.0239698	±	0.0136083	0.0196117	±	0.0130745	0.0305071	±	0.0136083	0.0501188	±	0.00754854	0.0544769	±	0.00377427	0.0871631	±	0.0136083	0.0522978	±	0.0339684	0.028328	±	0.00377427	0.0479397	±
OTU413	Proteobacteria	Alphaproteobacteria	Alphaproteobacteria_unclassified	Alphaproteobacteria_unclassified	Alphaproteobacteria_unclassified	0.0435815	±	0.00998578	0.0261489	±	0.0130745	0.0392234	±	0.0130745	0.0610141	±	0.0136083	0.0414025	±	0.00377427	0.0414025	±	0.0136083	0.0370443	±	0.00754854	0.0457606	±	0.0172959	0.0239698	±	0.00754854	0.0479397	±	0.0136083	0.0479397	±	0.00998578	0.0457606	±	0.00653723	0.0392234	±	0.00653723	0.0522978	±	0.0643842	0.0348652	±
OTU266	Acidobacteria	Acidobacteria_Gp7	Gp7	Gp7_unclassified	Gp7_unclassified	0.0501188	±	0.0164517	0.0501188	±	0.0136083	0.0762677	±	0.0264199	0.0392234	±	0.0284951	0.0414025	±	0.0136083	0.0544769	±	0.00998578	0.0261489	±	0.0113228	0.0435815	±	0.00998578	0.0610141	±	0.0301942	0.0588351	±	0.0196117	0.0392234	±	0.00653723	0.0196117	±	0.0196117	0.0544769	±	0.045916	0.0370443	±	0.029478	0.0392234	±
OTU356	Firmicutes	Bacilli	Bacillales	Thermoactinomycetaceae_1	Shimazuella	0.0152535	±	0.00998578	0.0174326	±	0.0150971	0.0152535	±	0.00754854	0.0130745	±	0.0130745	0.0697304	±	0.0877873	0.0828049	±	0.0766093	0.0588351	±	0.0113228	0.056656	±	0.0301942	0.0631932	±	0.045916	0.0261489	±	0.0196117	0.0392234	±	0.0113228	0.0326861	±	0.0299573	0.11767	±	0.153172	0.0414025	±	0.0272167	0.0326861	±
OTU4927	Bacteroidetes	Sphingobacteriia	Sphingobacteriales	Sphingobacteriaceae	Sphingobacterium	0	±	0	0	±	0	0	±	0	0	±	0	0.00217908	±	0.00377427	0	±	0	0	±	0	0	±	0	0.00217908	±	0.00377427	0.00217908	±	0.00377427	0	±	0	0.00217908	±	0.00377427	0.00217908	±	0.00377427	0.00435815	±	0.00754854	0	±
OTU188	Bacteria_unclassified	Bacteria_unclassified	Bacteria_unclassified	Bacteria_unclassified	Bacteria_unclassified	0.0152535	±	0.00998578	0.00871631	±	0.00377427	0.0239698	±	0.0164517	0.0392234	±	0.0471406	0.0305071	±	0.022958	0.0196117	±	0.0172959	0.0457606	±	0.0113228	0.0370443	±	0.0164517	0.0610141	±	0.0360043	0.0501188	±	0.00754854	0.0588351	±	0.0299573	0.0762677	±	0.00998578	0.056656	±	0.0264199	0.0326861	±	0.0345918	0.0435815	±
OTU249	Acidobacteria	Acidobacteria_Gp10	Gp10	Gp10_unclassified	Gp10_unclassified	0.00871631	±	0.00377427	0.0152535	±	0.0136083	0.0305071	±	0.0136083	0.0261489	±	0.0130745	0.0479397	±	0.0210143	0.0348652	±	0.0272167	0.056656	±	0.0272167	0.0261489	±	0.0130745	0.0522978	±	0.0299573	0.0239698	±	0.0164517	0.0653723	±	0.0569902	0.0719095	±	0.049355	0.0348652	±	0.029478	0.0326861	±	0.0235703	0.0653723	±
OTU273	Firmicutes	Bacilli	Bacillales	Alicyclobacillaceae	Tumebacillus	0.00217908	±	0.00377427	0	±	0	0	±	0	0.00217908	±	0.00377427	0.161252	±	0.279296	0.0261489	±	0.0397644	0.0610141	±	0.0779915	0	±	0	0.156894	±	0.249445	0.00435815	±	0.00377427	0.0152535	±	0.0136083	0	±	0	0.0653723	±	0.113228	0.0196117	±	0.0339684	0.0544769	±
OTU8876	Proteobacteria	Alphaproteobacteria	Rhizobiales	Hyphomicrobiaceae	Hyphomicrobium	0.028328	±	0.00754854	0.0217908	±	0.00998578	0.0392234	±	0.0299573	0.0348652	±	0.0164517	0.0435815	±	0.022958	0.0522978	±	0.0130745	0.056656	±	0.0164517	0.0239698	±	0.0136083	0.0392234	±	0.0113228	0.0392234	±	0.0130745	0.0522978	±	0.0172959	0.0457606	±	0.0113228	0.0370443	±	0.00377427	0.028328	±	0.00754854	0.0653723	±
OTU301	Bacteria_unclassified	Bacteria_unclassified	Bacteria_unclassified	Bacteria_unclassified	Bacteria_unclassified	0.0522978	±	0.0284951	0.0653723	±	0.0339684	0.0501188	±	0.0329033	0.0501188	±	0.0136083	0.0610141	±	0.0399431	0.0370443	±	0.0247496	0.0261489	±	0.0130745	0.0675514	±	0.043527	0.0435815	±	0.0264199	0.0392234	±	0.0226456	0.028328	±	0.00998578	0.0414025	±	0.0188714	0.0305071	±	0.00998578	0.0261489	±	0.0172959	0.0348652	±
OTU4441	Proteobacteria	Gammaproteobacteria	Pseudomonadales	Pseudomonadaceae	Pseudomonas	0.0479397	±	0.0136083	0.0522978	±	0.0235703	0.0414025	±	0.022958	0.056656	±	0.0329033	0.0479397	±	0.0371723	0.0937003	±	0.0494991	0.0370443	±	0.0136083	0.0392234	±	0.0261489	0.00871631	±	0.0150971	0.0370443	±	0.0481867	0.0130745	±	0.0226456	0.0152535	±	0.0210143	0.0130745	±	0.0172959	0.0544769	±	0.0593173	0.0130745	±
OTU199	Proteobacteria	Deltaproteobacteria	Myxococcales	Polyangiaceae	Sorangium	0.0239698	±	0.00998578	0.0522978	±	0.040825	0.0239698	±	0.00754854	0.0348652	±	0.0301942	0.0435815	±	0.0247496	0.0435815	±	0.0164517	0.0719095	±	0.0226456	0.084984	±	0.0691835	0.0501188	±	0.0360043	0.0261489	±	0.0113228	0.0697304	±	0.0628164	0.0544769	±	0.022958	0.0152535	±	0.0150971	0.0457606	±	0.0510574	0.0653723	±
OTU6519	Acidobacteria	Acidobacteria_Gp4	Aridibacter	Aridibacter_unclassified	Aridibacter_unclassified	0.0392234	±	0.0172959	0.028328	±	0.0150971	0.0348652	±	0.00998578	0.0348652	±	0.0272167	0.0697304	±	0.0394045	0.0414025	±	0.00998578	0.0740886	±	0.0494991	0.0762677	±	0.022958	0.0435815	±	0.0136083	0.0610141	±	0.0164517	0.0501188	±	0.0164517	0.0392234	±	0.0172959	0.0435815	±	0.0188714	0.028328	±	0.0150971	0.0305071	±
OTU502	Chloroflexi	Chloroflexi_unclassified	Chloroflexi_unclassified	Chloroflexi_unclassified	Chloroflexi_unclassified	0.0522978	±	0.0226456	0.028328	±	0.00377427	0.0392234	±	0.0172959	0.0239698	±	0.0136083	0.0479397	±	0.029478	0.0501188	±	0.0360043	0.0522978	±	0.0226456	0.0457606	±	0.0130745	0.0915212	±	0.00653723	0.0479397	±	0.0383047	0.0522978	±	0.0235703	0.028328	±	0.00377427	0.0457606	±	0.0130745	0.0370443	±	0.00754854	0.0479397	±
OTU274	Proteobacteria	Deltaproteobacteria	Myxococcales	Cystobacteraceae	Anaeromyxobacter	0.0631932	±	0.0264199	0.0544769	±	0.0264199	0.084984	±	0.0172959	0.0522978	±	0.0235703	0.0414025	±	0.00754854	0.0544769	±	0.0199716	0.0610141	±	0.0308937	0.0501188	±	0.0150971	0.0239698	±	0.0150971	0.0610141	±	0.0247496	0.056656	±	0.0371723	0.0501188	±	0.0136083	0.0239698	±	0.00754854	0.0392234	±	0.0235703	0.0174326	±
OTU718	Proteobacteria	Gammaproteobacteria	Xanthomonadales	Sinobacteraceae	Steroidobacter	0.0392234	±	0.0196117	0.0370443	±	0.022958	0.00217908	±	0.00377427	0.0239698	±	0.0188714	0.0522978	±	0.0226456	0.0348652	±	0.0150971	0.0392234	±	0.00653723	0.0435815	±	0.0425339	0.0871631	±	0.0264199	0.0326861	±	0.00653723	0.0479397	±	0.0199716	0.0326861	±	0.00653723	0.0305071	±	0.0371723	0.056656	±	0.00998578	0.0675514	±
OTU2022	Proteobacteria	Betaproteobacteria	Burkholderiales	Burkholderiales_unclassified	Burkholderiales_unclassified	0.0261489	±	0.0196117	0.0414025	±	0.0150971	0.0479397	±	0.0264199	0.0370443	±	0.0164517	0.0544769	±	0.0136083	0.0174326	±	0.0199716	0.0675514	±	0.0136083	0.0392234	±	0.0284951	0.0457606	±	0.0345918	0.0174326	±	0.0164517	0.0196117	±	0.0113228	0.0392234	±	0.0196117	0.0152535	±	0.0164517	0.0239698	±	0.0188714	0.0610141	±
OTU519	Acidobacteria	Acidobacteria_Gp10	Gp10	Gp10_unclassified	Gp10_unclassified	0	±	0	0	±	0	0.0130745	±	0.0130745	0.00435815	±	0.00377427	0.0435815	±	0.0472915	0.0414025	±	0.0717112	0.0414025	±	0.0555985	0.028328	±	0.0383047	0.126386	±	0.156939	0.0370443	±	0.0585924	0.0719095	±	0.0976217	0.0152535	±	0.0210143	0.0631932	±	0.0621323	0.0239698	±	0.0264199	0.0370443	±
OTU282	Armatimonadetes	Armatimonadetes_gp5	Armatimonadetes_gp5_unclassified	Armatimonadetes_gp5_unclassified	Armatimonadetes_gp5_unclassified	0.0217908	±	0.00377427	0.0108954	±	0.00377427	0.0261489	±	0.0172959	0.0348652	±	0.0210143	0.0370443	±	0.0136083	0.0261489	±	0.0130745	0.0501188	±	0.0199716	0.0522978	±	0.0130745	0.056656	±	0.0247496	0.0392234	±	0.00653723	0.0435815	±	0.00998578	0.0348652	±	0.022958	0.0392234	±	0.0172959	0.0588351	±	0.00653723	0.0326861	±
OTU254	Proteobacteria	Alphaproteobacteria	Rhizobiales	Rhizobiales_unclassified	Rhizobiales_unclassified	0.0261489	±	0.0226456	0.0239698	±	0.00754854	0.0217908	±	0.00998578	0.0370443	±	0.0264199	0.028328	±	0.00377427	0.0326861	±	0.0397644	0.0501188	±	0.0272167	0.0196117	±	0.0113228	0.0479397	±	0.029478	0.0392234	±	0.0235703	0.0261489	±	0.0130745	0.0326861	±	0.0172959	0.0326861	±	0.0172959	0.0501188	±	0.0335465	0.0217908	±
OTU499	Proteobacteria	Deltaproteobacteria	Myxococcales	Nannocystaceae	Enhygromyxa	0.0740886	±	0.00377427	0.0457606	±	0.0172959	0.028328	±	0.00754854	0.0784468	±	0.0261489	0.0305071	±	0.0329033	0.0326861	±	0.00653723	0.0435815	±	0.00754854	0.0370443	±	0.022958	0.0610141	±	0.0360043	0.0501188	±	0.0481867	0.0326861	±	0.0172959	0.0522978	±	0.0363978	0.0196117	±	0.0226456	0.0239698	±	0.0136083	0.0588351	±
OTU501	Planctomycetes	Planctomycetia	Planctomycetales	Planctomycetaceae	Gemmata	0.0544769	±	0.00377427	0.0326861	±	0.0235703	0.0348652	±	0.0199716	0.0326861	±	0.0113228	0.0435815	±	0.00754854	0.0326861	±	0.0130745	0.0370443	±	0.0210143	0.0435815	±	0.0247496	0.056656	±	0.00998578	0.0435815	±	0.0150971	0.0392234	±	0.0299573	0.028328	±	0.00377427	0.0239698	±	0.00754854	0.0414025	±	0.0399431	0.0305071	±
OTU312	Proteobacteria	Deltaproteobacteria	Desulfobacterales	Desulfobulbaceae	Desulfocapsa	0.0544769	±	0.0329033	0.0631932	±	0.0136083	0.056656	±	0.0360043	0.0675514	±	0.0199716	0.0435815	±	0.0150971	0.0217908	±	0.0322474	0.0457606	±	0.0457606	0.0370443	±	0.00998578	0.056656	±	0.0360043	0.0893421	±	0.0686668	0.0457606	±	0.0345918	0.0196117	±	0.0284951	0.0370443	±	0.00377427	0.0370443	±	0.0329033	0.0370443	±
OTU2255	Proteobacteria	Betaproteobacteria	Burkholderiales	Oxalobacteraceae	Massilia	0.084984	±	0.00653723	0.128566	±	0.022958	0.11767	±	0.101485	0.124207	±	0.040825	0.0719095	±	0.0235703	0.0501188	±	0.0322474	0.0544769	±	0.00998578	0.0457606	±	0.0284951	0.00217908	±	0.00377427	0.00871631	±	0.0150971	0.0130745	±	0.0172959	0.00653723	±	0.00653723	0.0152535	±	0.0136083	0.0130745	±	0.0172959	0.028328	±
OTU223	Verrucomicrobia	Subdivision3	Subdivision3_unclassified	Subdivision3_unclassified	Subdivision3_unclassified	0.0326861	±	0.0235703	0.0217908	±	0.0136083	0.0261489	±	0.0130745	0.0326861	±	0.0130745	0.00653723	±	0.00653723	0.0348652	±	0.0188714	0.0217908	±	0.0272167	0.0174326	±	0.00377427	0.028328	±	0.0150971	0.0675514	±	0.0607411	0.0544769	±	0.0247496	0.0784468	±	0.0581042	0.0305071	±	0.0247496	0.0653723	±	0.0795288	0.0261489	±
OTU177	Firmicutes	Clostridia	Clostridiales	Peptostreptococcaceae	Sporacetigenium	0.0762677	±	0.0563619	0.0610141	±	0.0377427	0.0697304	±	0.0264199	0.0740886	±	0.0264199	0.0326861	±	0.0172959	0.0457606	±	0.0130745	0.0239698	±	0.0150971	0.0261489	±	0.0226456	0.0326861	±	0.0113228	0.0544769	±	0.041517	0.0370443	±	0.00998578	0.0348652	±	0.029478	0.0305071	±	0.00998578	0.0196117	±	0.0196117	0.0370443	±
OTU222	Bacteria_unclassified	Bacteria_unclassified	Bacteria_unclassified	Bacteria_unclassified	Bacteria_unclassified	0.0130745	±	0.0113228	0.0435815	±	0.0322474	0.0326861	±	0.0299573	0.0348652	±	0.022958	0.0348652	±	0.0264199	0.0326861	±	0.0397644	0.0435815	±	0.0264199	0.0675514	±	0.022958	0.0392234	±	0.0284951	0.0653723	±	0.0535095	0.0588351	±	0.0172959	0.0806258	±	0.0272167	0.0435815	±	0.0394045	0.0326861	±	0.0113228	0.0479397	±
OTU218	Planctomycetes	Planctomycetia	Planctomycetales	Planctomycetaceae	Planctomycetaceae_unclassified	0.028328	±	0.00377427	0.00653723	±	0.00653723	0.0631932	±	0.0264199	0.0239698	±	0.00377427	0.0544769	±	0.00998578	0.0457606	±	0.0172959	0.0392234	±	0.0392234	0.0326861	±	0.0172959	0.0326861	±	0.0196117	0.0588351	±	0.0172959	0.0631932	±	0.00998578	0.0501188	±	0.0164517	0.0326861	±	0.0172959	0.0239698	±	0.00377427	0.0305071	±
OTU209	Bacteria_unclassified	Bacteria_unclassified	Bacteria_unclassified	Bacteria_unclassified	Bacteria_unclassified	0.0239698	±	0.00377427	0.0544769	±	0.00377427	0.0544769	±	0.0164517	0.0457606	±	0.0130745	0.0479397	±	0.00998578	0.0457606	±	0.0284951	0.0435815	±	0.0308937	0.0653723	±	0.0226456	0.0174326	±	0.00998578	0.0392234	±	0.0284951	0.0348652	±	0.00998578	0.056656	±	0.0150971	0.0435815	±	0.022958	0.0414025	±	0.0272167	0.0370443	±
OTU473	Acidobacteria	Acidobacteria_Gp6	Gp6	Gp6_unclassified	Gp6_unclassified	0.0806258	±	0.0394045	0.056656	±	0.00754854	0.0784468	±	0.0172959	0.0631932	±	0.0210143	0.0370443	±	0.0150971	0.0631932	±	0.0481867	0.0479397	±	0.0164517	0.028328	±	0.0188714	0.0239698	±	0.00998578	0.0479397	±	0.0555985	0.028328	±	0.0199716	0.0326861	±	0.00653723	0.0130745	±	0.0113228	0.0414025	±	0.0199716	0.0305071	±
OTU329	Proteobacteria	Betaproteobacteria	Rhodocyclales	Rhodocyclaceae	Rhodocyclaceae_unclassified	0.0370443	±	0.0308937	0.0130745	±	0.0113228	0.0370443	±	0.022958	0.0348652	±	0.00998578	0.0370443	±	0.0188714	0.0675514	±	0.0247496	0.0414025	±	0.00998578	0.0479397	±	0.00754854	0.056656	±	0.00998578	0.0588351	±	0.0339684	0.0261489	±	0.0130745	0.056656	±	0.0329033	0.0174326	±	0.0199716	0.0457606	±	0.0172959	0.0588351	±
OTU237	Proteobacteria	Deltaproteobacteria	Deltaproteobacteria_unclassified	Deltaproteobacteria_unclassified	Deltaproteobacteria_unclassified	0.0522978	±	0.0226456	0.0435815	±	0.00377427	0.0370443	±	0.0136083	0.0348652	±	0.0247496	0.0806258	±	0.0360043	0.0501188	±	0.0188714	0.0196117	±	0.0284951	0.0392234	±	0.0113228	0.0326861	±	0	0.0719095	±	0.0113228	0.0305071	±	0.0199716	0.0435815	±	0.0247496	0.0239698	±	0.00998578	0.0348652	±	0.00754854	0.0414025	±
OTU12041	Proteobacteria	Alphaproteobacteria	Rhizobiales	Bradyrhizobiaceae	Bradyrhizobiaceae_unclassified	0	±	0	0	±	0	0	±	0	0	±	0	0	±	0	0	±	0	0	±	0	0	±	0	0	±	0	0	±	0	0	±	0	0	±	0	0.0108954	±	0.00998578	0.00435815	±	0.00754854	0	±
OTU713	Proteobacteria	Gammaproteobacteria	Xanthomonadales	Sinobacteraceae	Steroidobacter	0.0588351	±	0.0363978	0.0610141	±	0.029478	0.0501188	±	0.00998578	0.0457606	±	0.0113228	0.0326861	±	0.0299573	0.028328	±	0.0210143	0.0239698	±	0.0164517	0.056656	±	0.0272167	0.0479397	±	0.0272167	0.0414025	±	0.0210143	0.0217908	±	0.022958	0.0326861	±	0.0113228	0.028328	±	0.0264199	0.028328	±	0.00998578	0.0653723	±
OTU289	Acidobacteria	Acidobacteria_Gp3	Gp3	Gp3_unclassified	Gp3_unclassified	0.0414025	±	0.0360043	0.0326861	±	0.00653723	0.0435815	±	0.0164517	0.0326861	±	0.00653723	0.0305071	±	0.0136083	0.0414025	±	0.0164517	0.0174326	±	0.00998578	0.0392234	±	0.0392234	0.0261489	±	0.0130745	0.0631932	±	0.0199716	0.0653723	±	0.00653723	0.0414025	±	0.0150971	0.0239698	±	0.0164517	0.0326861	±	0.00653723	0.028328	±
OTU5002	Acidobacteria	Acidobacteria_Gp10	Gp10	Gp10_unclassified	Gp10_unclassified	0.0305071	±	0.00998578	0.0326861	±	0.0345918	0.028328	±	0.00998578	0.0522978	±	0.0226456	0.0675514	±	0.0136083	0.0479397	±	0.0188714	0.056656	±	0.0210143	0.0326861	±	0.0172959	0.0937003	±	0.0617875	0.0414025	±	0.0383047	0.0392234	±	0.0130745	0.0370443	±	0.0210143	0.0479397	±	0.0490655	0.0348652	±	0.0272167	0.0326861	±
OTU456	Verrucomicrobia	Verrucomicrobiae	Verrucomicrobiales	Verrucomicrobiaceae	Luteolibacter	0.00653723	±	0.0113228	0.00217908	±	0.00377427	0.00217908	±	0.00377427	0.00217908	±	0.00377427	0.0152535	±	0.00754854	0	±	0	0.00653723	±	0.0113228	0.00653723	±	0.0113228	0.0261489	±	0.0261489	0.00435815	±	0.00754854	0.00435815	±	0.00377427	0.00871631	±	0.00754854	0.0392234	±	0.0172959	0.0828049	±	0.121482	0.00653723	±
OTU384	Chloroflexi	Chloroflexi_unclassified	Chloroflexi_unclassified	Chloroflexi_unclassified	Chloroflexi_unclassified	0.0305071	±	0.029478	0.0479397	±	0.029478	0.0457606	±	0.00653723	0.0479397	±	0.0210143	0.0544769	±	0.0490655	0.0217908	±	0.00754854	0.028328	±	0.0210143	0.0261489	±	4.24919e-18	0.0239698	±	0.022958	0.0457606	±	0.0130745	0.0414025	±	0.022958	0.0479397	±	0.022958	0.0217908	±	0.00998578	0.056656	±	0.043527	0.0326861	±
OTU375	Proteobacteria	Betaproteobacteria	Rhodocyclales	Rhodocyclaceae	Azoarcus	0.0174326	±	0.0247496	0.00653723	±	1.0623e-18	0.0217908	±	0.0164517	0.0108954	±	0.00998578	0.130745	±	0.148497	0.150356	±	0.075391	0.122028	±	0.0957059	0.100238	±	0.0853186	0.0108954	±	0.00998578	0.0806258	±	0.0621323	0.0719095	±	0.0864794	0.00435815	±	0.00377427	0.0217908	±	0.0322474	0.00653723	±	0.0113228	0.0217908	±
OTU497	Bacteria_unclassified	Bacteria_unclassified	Bacteria_unclassified	Bacteria_unclassified	Bacteria_unclassified	0.0610141	±	0.0272167	0.0610141	±	0.0199716	0.0610141	±	0.0199716	0.0261489	±	0.00653723	0.0479397	±	0.0272167	0.0522978	±	0.0299573	0.0239698	±	0.0301942	0.056656	±	0.029478	0.0305071	±	0.0136083	0.0326861	±	0.0113228	0.0326861	±	0.0261489	0.0479397	±	0.0247496	0.0261489	±	0.0196117	0.0261489	±	0.0172959	0.0239698	±
OTU296	Proteobacteria	Alphaproteobacteria	Rhizobiales	Rhizobiales_unclassified	Rhizobiales_unclassified	0.0457606	±	0.0130745	0.028328	±	0.00998578	0.0239698	±	0.00754854	0.0414025	±	0.0164517	0.0261489	±	0.0172959	0.0414025	±	0.0164517	0.0174326	±	0.0136083	0.0239698	±	0.00998578	0.056656	±	0.0199716	0.0544769	±	0.0210143	0.0392234	±	0.0113228	0.0370443	±	0.0164517	0.0414025	±	0.0164517	0.0719095	±	0.0235703	0.0457606	±
OTU459	Proteobacteria	Betaproteobacteria	Betaproteobacteria_unclassified	Betaproteobacteria_unclassified	Betaproteobacteria_unclassified	0.0414025	±	0.0136083	0.0435815	±	0.022958	0.0522978	±	0.0113228	0.056656	±	0.0264199	0.0740886	±	0.00998578	0.0414025	±	0.0394045	0.0348652	±	0.0164517	0.056656	±	0.0136083	0.0326861	±	0.00653723	0.0501188	±	0.0371723	0.0326861	±	0.0235703	0.0457606	±	0.0172959	0.0326861	±	0.0261489	0.0370443	±	0.00377427	0.0370443	±
OTU5231	Actinobacteria	Actinobacteria	Actinomycetales	Geodermatophilaceae	Modestobacter	0.0828049	±	0.0272167	0.0631932	±	0.0383047	0.0675514	±	0.0164517	0.0522978	±	0.0226456	0.0610141	±	0.0383047	0.0501188	±	0.0329033	0.0370443	±	0.0136083	0.0631932	±	0.0335465	0.00217908	±	0.00377427	0.0261489	±	0.0113228	0.0305071	±	0.0360043	0.0305071	±	0.0199716	0.0174326	±	0.0136083	0.0239698	±	0.0199716	0.0239698	±
OTU403	Proteobacteria	Deltaproteobacteria	Deltaproteobacteria_unclassified	Deltaproteobacteria_unclassified	Deltaproteobacteria_unclassified	0.056656	±	0.0308937	0.0501188	±	0.00998578	0.0479397	±	0.0377427	0.0457606	±	0.0226456	0.0370443	±	0.0264199	0.0392234	±	0.0226456	0.028328	±	0.0210143	0.0239698	±	0.00377427	0.0740886	±	0.0499289	0.0479397	±	0.0150971	0.0457606	±	0.0172959	0.0370443	±	0.0360043	0.0174326	±	0.0164517	0.0305071	±	0.0272167	0.0544769	±
OTU9736	Proteobacteria	Betaproteobacteria	Burkholderiales	Comamonadaceae	Ramlibacter	0.0196117	±	0.0172959	0.0196117	±	0.0196117	0.0326861	±	0.0339684	0.028328	±	0.00377427	0.0479397	±	0.00754854	0.0370443	±	0.00377427	0.0501188	±	0.0247496	0.0326861	±	0.0172959	0.0435815	±	0.0272167	0.028328	±	0.00754854	0.028328	±	0.00754854	0.0326861	±	0.0196117	0.0435815	±	0.00754854	0.0588351	±	0.0326861	0.0326861	±
OTU407	Acidobacteria	Acidobacteria_Gp10	Gp10	Gp10_unclassified	Gp10_unclassified	0.0130745	±	0.0130745	0.0174326	±	0.00998578	0.0152535	±	0.0164517	0.028328	±	0.00754854	0.0457606	±	0.0363978	0.0370443	±	0.0264199	0.0457606	±	0.0299573	0.0435815	±	0.0499289	0.0152535	±	0.0150971	0.028328	±	0.022958	0.0522978	±	0.00653723	0.0414025	±	0.0199716	0.167789	±	0.195717	0.0326861	±	0.00653723	0.0370443	±
OTU8450	Proteobacteria	Alphaproteobacteria	Rhizobiales	Rhizobiales_unclassified	Rhizobiales_unclassified	0.056656	±	0.043527	0.0348652	±	0.00998578	0.0414025	±	0.00998578	0.0130745	±	0.00653723	0.0305071	±	0.0264199	0.0414025	±	0.0399431	0.028328	±	0.0136083	0.0370443	±	0.0199716	0.0152535	±	0.00377427	0.0239698	±	0.00377427	0.0326861	±	0.0261489	0.0414025	±	0.0377427	0.0479397	±	0.0199716	0.0261489	±	0.0113228	0.0457606	±
OTU582	Proteobacteria	Betaproteobacteria	Betaproteobacteria_unclassified	Betaproteobacteria_unclassified	Betaproteobacteria_unclassified	0.0479397	±	0.00998578	0.0348652	±	0.0150971	0.0610141	±	0.0383047	0.0828049	±	0.0199716	0.0239698	±	0.00377427	0.0305071	±	0.00998578	0.0239698	±	0.0164517	0.0305071	±	0.0150971	0.084984	±	0.114914	0.0675514	±	0.0371723	0.0305071	±	0.0136083	0.056656	±	0.0360043	0.0414025	±	0.022958	0.0414025	±	0.0399431	0.028328	±
OTU314	Gemmatimonadetes	Gemmatimonadetes	Gemmatimonadales	Gemmatimonadaceae	Gemmatimonas	0.0217908	±	0.00998578	0.0414025	±	0.0164517	0.0239698	±	0.0164517	0.0108954	±	0.00754854	0.0610141	±	0.0555985	0.0457606	±	0.0172959	0.0479397	±	0.0272167	0.0631932	±	0.058956	0.0479397	±	0.0308937	0.056656	±	0.0360043	0.0370443	±	0.0136083	0.0544769	±	0.043527	0.0392234	±	0.0510574	0.028328	±	0.0199716	0.0261489	±
OTU454	Bacteria_unclassified	Bacteria_unclassified	Bacteria_unclassified	Bacteria_unclassified	Bacteria_unclassified	0.0196117	±	0.0172959	0.0326861	±	0.0130745	0.0196117	±	0.0130745	0.0174326	±	0.0199716	0.0544769	±	0.0188714	0.0305071	±	0.022958	0.0631932	±	0.0264199	0.0435815	±	0.0210143	0.0522978	±	0.0113228	0.0370443	±	0.0308937	0.0522978	±	0.0679369	0.0435815	±	0.0136083	0.0435815	±	0.0360043	0.0326861	±	0.0172959	0.028328	±
OTU5289	Actinobacteria	Actinobacteria	Actinomycetales	Nocardioidaceae	Nocardioides	0.0828049	±	0.0499289	0.0784468	±	0.0471406	0.0610141	±	0.0472915	0.0544769	±	0.0199716	0.0348652	±	0.0210143	0.0348652	±	0.00377427	0.0479397	±	0.00998578	0.0544769	±	0.029478	0.0108954	±	0.00754854	0.056656	±	0.0371723	0.0152535	±	0.0150971	0.0326861	±	0.0457606	0.056656	±	0.0329033	0.0392234	±	0.0457606	0.0392234	±
OTU219	Chloroflexi	Caldilineae	Caldilineales	Caldilineaceae	Litorilinea	0.0479397	±	0.0199716	0.0479397	±	0.00377427	0.0610141	±	0.0199716	0.0348652	±	0.00998578	0.0348652	±	0.0188714	0.0414025	±	0.0136083	0.0392234	±	0.0196117	0.0697304	±	0.0150971	0.0588351	±	0.0113228	0.0326861	±	0.0196117	0.0479397	±	0.0136083	0.056656	±	0.022958	0.0196117	±	0.00653723	0.0370443	±	0.0150971	0.0414025	±
OTU229	Acidobacteria	Acidobacteria_Gp6	Gp6	Gp6_unclassified	Gp6_unclassified	0.00653723	±	0.00653723	0.00653723	±	0.00653723	0.00653723	±	0.00653723	0.0130745	±	0.00653723	0.0610141	±	0.0555985	0.0457606	±	0.0261489	0.0457606	±	0.0457606	0.0370443	±	0.0150971	0.0806258	±	0.0210143	0.028328	±	0.0199716	0.0501188	±	0.0164517	0.056656	±	0.044498	0.0501188	±	0.0150971	0.0588351	±	0.0792597	0.0522978	±
OTU986	Proteobacteria	Deltaproteobacteria	Myxococcales	Cystobacteraceae	Anaeromyxobacter	0.0653723	±	0.0172959	0.0675514	±	0.0136083	0.0544769	±	0.00754854	0.0544769	±	0.0136083	0.0457606	±	0.0261489	0.0588351	±	0.0457606	0.0217908	±	0.0136083	0.0370443	±	0.0360043	0.0348652	±	0.0210143	0.0305071	±	0.0150971	0.028328	±	0.00998578	0.0348652	±	0.043527	0.028328	±	0.00754854	0.0174326	±	0.00998578	0.0348652	±
OTU721	Verrucomicrobia	Opitutae	Opitutales	Opitutaceae	Opitutus	0.0653723	±	0.0172959	0.0457606	±	0.0235703	0.0414025	±	0.0164517	0.0392234	±	0.0235703	0.0588351	±	0.0339684	0.0697304	±	0.0399431	0.0414025	±	0.0247496	0.056656	±	0.00998578	0.0435815	±	0.043527	0.0326861	±	0.0196117	0.0348652	±	0.0210143	0.0501188	±	0.022958	0.0217908	±	0.0150971	0.00871631	±	0.00998578	0.028328	±
OTU9447	Proteobacteria	Alphaproteobacteria	Rhizobiales	Methylobacteriaceae	Microvirga	0.0152535	±	0.00377427	0.0217908	±	0.0164517	0.00653723	±	0.0113228	0.0305071	±	0.0247496	0.0522978	±	0.0261489	0.0479397	±	0.0188714	0.0653723	±	0.0172959	0.0457606	±	0.0235703	0.0828049	±	0.0360043	0.0261489	±	0.0284951	0.0239698	±	0.0150971	0.0261489	±	0.0172959	0.0261489	±	0.0130745	0.056656	±	0.0766093	0.0828049	±
OTU227	Proteobacteria	Betaproteobacteria	Betaproteobacteria_unclassified	Betaproteobacteria_unclassified	Betaproteobacteria_unclassified	0.056656	±	0.022958	0.084984	±	0.0471406	0.0719095	±	0.0261489	0.056656	±	0.00377427	0.0326861	±	0.0172959	0.0501188	±	0.0532426	0.0326861	±	0.00653723	0.0174326	±	0.0199716	0.0370443	±	0.029478	0.0697304	±	0.0360043	0.0239698	±	0.0164517	0.028328	±	0.0210143	0.0239698	±	0.00998578	0.0261489	±	0.0397644	0.0196117	±
OTU389	Acidobacteria	Acidobacteria_Gp6	Gp6	Gp6_unclassified	Gp6_unclassified	0.0806258	±	0.0528398	0.0479397	±	0.0264199	0.0762677	±	0.0264199	0.056656	±	0.0136083	0.0457606	±	0.0326861	0.0588351	±	0.0284951	0.0392234	±	0.0428675	0.0370443	±	0.0164517	0.0239698	±	0.0164517	0.0871631	±	0.044498	0.0414025	±	0.0136083	0.0479397	±	0.0188714	0.0370443	±	0.0199716	0.0305071	±	0.0199716	0.0152535	±
OTU742	Proteobacteria	Gammaproteobacteria	Chromatiales	Chromatiales_unclassified	Chromatiales_unclassified	0.0239698	±	0.00998578	0.0305071	±	0.0199716	0.0261489	±	0.0113228	0.028328	±	0.0136083	0.0217908	±	0.00377427	0.0610141	±	0.0136083	0.0479397	±	0.0136083	0.028328	±	0.0210143	0.0501188	±	0.0188714	0.0414025	±	0.0164517	0.056656	±	0.022958	0.0937003	±	0.0790798	0.0239698	±	0.00754854	0.0435815	±	0.00754854	0.0305071	±
OTU337	Acidobacteria	Acidobacteria_Gp4	Gp4	Gp4_unclassified	Gp4_unclassified	0.00653723	±	0.0113228	0.0305071	±	0.00377427	0.0435815	±	0.022958	0.0435815	±	0.0199716	0.0239698	±	0.0199716	0.0392234	±	0.0235703	0.028328	±	0.00998578	0.0414025	±	0.00998578	0.0501188	±	0.0377427	0.0305071	±	0.0136083	0.028328	±	0.0199716	0.0479397	±	0.0264199	0.0261489	±	0.0130745	0.0457606	±	8.49837e-18	0.0217908	±
OTU516	Proteobacteria	Deltaproteobacteria	Deltaproteobacteria_unclassified	Deltaproteobacteria_unclassified	Deltaproteobacteria_unclassified	0.0392234	±	0.0284951	0.0414025	±	0.00377427	0.0261489	±	0.00653723	0.0544769	±	0.0383047	0.0392234	±	0.0130745	0.0544769	±	0.0377427	0.0326861	±	0.0172959	0.0653723	±	0.0397644	0.0108954	±	0.00377427	0.0414025	±	0.00998578	0.0457606	±	0.0457606	0.056656	±	0.029478	0.028328	±	0.0150971	0.0305071	±	0.00998578	0.0392234	±
OTU373	Chloroflexi	Chloroflexi_unclassified	Chloroflexi_unclassified	Chloroflexi_unclassified	Chloroflexi_unclassified	0.00871631	±	0.00998578	0.0305071	±	0.0150971	0.0457606	±	0.00653723	0.0239698	±	0.0136083	0.0588351	±	0.0172959	0.0435815	±	0.00754854	0.0740886	±	0.0188714	0.0370443	±	0.0136083	0.0326861	±	0.0172959	0.0326861	±	0.0172959	0.0108954	±	0.0136083	0.0392234	±	0.0345918	0.0479397	±	0.00998578	0.0305071	±	0.0136083	0.028328	±
OTU829	Acidobacteria	Acidobacteria_Gp3	Gp3	Gp3_unclassified	Gp3_unclassified	0.0348652	±	0.0136083	0.0326861	±	0.0397644	0.0435815	±	0.0188714	0.0239698	±	0.0210143	0.0457606	±	0.0397644	0.0544769	±	0.0199716	0.0239698	±	0.00998578	0.0501188	±	0.0264199	0.0588351	±	0.0130745	0.0675514	±	0.0150971	0.0675514	±	0.046379	0.0457606	±	0.0339684	0.0501188	±	0.00377427	0.0108954	±	0.00377427	0.0305071	±
OTU3127	Actinobacteria	Thermoleophilia	Thermoleophilales	Thermoleophilaceae	Thermoleophilum	0.0414025	±	0.029478	0.0261489	±	0.00653723	0.0370443	±	0.0188714	0.0501188	±	0.0136083	0.0501188	±	0.0329033	0.0326861	±	0.0172959	0.0392234	±	0.0226456	0.0610141	±	0.046379	0.0457606	±	0.00653723	0.0130745	±	0.0113228	0.028328	±	0.022958	0.0326861	±	0.0235703	0.0348652	±	0.00998578	0.028328	±	0.0335465	0.028328	±
OTU555	Proteobacteria	Deltaproteobacteria	Myxococcales	Polyangiaceae	Chondromyces	0.0457606	±	0.0299573	0.0370443	±	0.0164517	0.0501188	±	0.0199716	0.0631932	±	0.0301942	0.0348652	±	0.0383047	0.0305071	±	0.00377427	0.0457606	±	0.0196117	0.0348652	±	0.00377427	0.056656	±	0.0272167	0.0305071	±	0.00377427	0.0435815	±	0.00998578	0.0326861	±	0.00653723	0.0348652	±	0.0383047	0.0392234	±	0.0196117	0.0479397	±
OTU332	Bacteria_unclassified	Bacteria_unclassified	Bacteria_unclassified	Bacteria_unclassified	Bacteria_unclassified	0.0326861	±	0.0235703	0.0370443	±	0.00377427	0.0370443	±	0.0210143	0.0261489	±	0.0235703	0.0457606	±	0.0428675	0.0392234	±	0.0196117	0.0414025	±	0.00998578	0.0610141	±	0.0308937	0.0588351	±	0.0113228	0.0893421	±	0.075768	0.0828049	±	0.00754854	0.056656	±	0.00754854	0.0348652	±	0.00998578	0.0261489	±	0.0196117	0.0261489	±
OTU747	Proteobacteria	Gammaproteobacteria	Xanthomonadales	Xanthomonadaceae	Arenimonas	0.0610141	±	0.0322474	0.0261489	±	0.0130745	0.028328	±	0.0210143	0.0348652	±	0.029478	0.0501188	±	0.0301942	0.0414025	±	0.022958	0.0370443	±	0.0272167	0.0522978	±	0.0113228	0.0370443	±	0.0308937	0.0479397	±	0.0264199	0.0414025	±	0.0164517	0.0457606	±	0.0113228	0.0414025	±	0.0164517	0.0348652	±	0.0164517	0.0217908	±
OTU250	Planctomycetes	Planctomycetia	Planctomycetales	Planctomycetaceae	Planctomicrobium	0.0305071	±	0.00998578	0.0348652	±	0.00754854	0.0174326	±	0.0164517	0.028328	±	0.0322474	0.0348652	±	0.00377427	0.0261489	±	0.0130745	0.028328	±	0.0199716	0.0239698	±	0.0188714	0.0479397	±	0.0371723	0.0588351	±	0.0397644	0.0326861	±	0.0196117	0.0392234	±	0.00653723	0.0697304	±	0.0272167	0.0610141	±	0.0247496	0.0610141	±
OTU361	Proteobacteria	Alphaproteobacteria	Rhizobiales	Methylobacteriaceae	Methylobacterium	0.0414025	±	0.0717112	0.00871631	±	0.00754854	0.00217908	±	0.00377427	0.0174326	±	0.0164517	0.0152535	±	0.0264199	0.0130745	±	0.00653723	0.0108954	±	0.0136083	0.00653723	±	0.00653723	0.0958794	±	0.0779915	0.0108954	±	0.00998578	0.00871631	±	0.00754854	0.0326861	±	0.0261489	0.0501188	±	0.00754854	0.0370443	±	0.0329033	0.028328	±
OTU278	candidate_division_WPS-1	candidate_division_WPS-1_unclassified	candidate_division_WPS-1_unclassified	candidate_division_WPS-1_unclassified	candidate_division_WPS-1_unclassified	0.0239698	±	0.0360043	0.0435815	±	0.0264199	0.028328	±	0.00998578	0.0479397	±	0.0199716	0.028328	±	0.0136083	0.0326861	±	0.0130745	0.0501188	±	0.0188714	0.0544769	±	0.029478	0.0435815	±	0.0136083	0.0261489	±	4.24919e-18	0.0152535	±	0.0164517	0.0457606	±	0.0397644	0.028328	±	0.0136083	0.0152535	±	0.0164517	0.0348652	±
OTU2534	Proteobacteria	Alphaproteobacteria	Rhizobiales	Bradyrhizobiaceae	Rhodopseudomonas	0.056656	±	0.0136083	0.0893421	±	0.0394045	0.056656	±	0.022958	0.0740886	±	0.00998578	0.0414025	±	0.00377427	0.0414025	±	0.0247496	0.0392234	±	0.0172959	0.0392234	±	0.040825	0.0305071	±	0.00998578	0.0457606	±	0.0284951	0.0239698	±	0.00998578	0.0305071	±	0.0164517	0.0414025	±	0.00377427	0.0392234	±	0.0345918	0.00871631	±
OTU680	Bacteria_unclassified	Bacteria_unclassified	Bacteria_unclassified	Bacteria_unclassified	Bacteria_unclassified	0.0217908	±	0.0199716	0.028328	±	0.0264199	0.0348652	±	0.0322474	0.0217908	±	0.00377427	0.0392234	±	0.0113228	0.056656	±	0.0532426	0.0370443	±	0.0164517	0.028328	±	0.00998578	0.0479397	±	0.0322474	0.0588351	±	0.0130745	0.0588351	±	0.0363978	0.0501188	±	0.0308937	0.0239698	±	0.00377427	0.0326861	±	0.0113228	0.0653723	±
OTU271	Proteobacteria	Gammaproteobacteria	Xanthomonadales	Xanthomonadaceae	Tahibacter	0.00435815	±	0.00754854	0	±	0	0	±	0	0.00217908	±	0.00377427	0.00871631	±	0.00998578	0.00653723	±	0.0113228	0.0108954	±	0.0136083	0.00217908	±	0.00377427	0.0522978	±	0.0795288	0.0370443	±	0.0532426	0	±	0	0	±	0	0	±	0	0.0108954	±	0.00998578	0.00653723	±
OTU1843	candidate_division_WPS-1	candidate_division_WPS-1_unclassified	candidate_division_WPS-1_unclassified	candidate_division_WPS-1_unclassified	candidate_division_WPS-1_unclassified	0.0196117	±	0.0284951	0.0305071	±	0.0210143	0.0174326	±	0.00998578	0.0305071	±	0.0247496	0.0261489	±	0.0196117	0.0326861	±	0.0397644	0.0457606	±	0.0235703	0.0239698	±	0.0150971	0.0326861	±	0.0113228	0.0479397	±	0.0210143	0.0261489	±	0.00653723	0.0435815	±	0.00754854	0.028328	±	0.0272167	0.028328	±	0.0199716	0.0217908	±
OTU443	Acidobacteria	Acidobacteria_Gp4	Gp4	Gp4_unclassified	Gp4_unclassified	0.0392234	±	0.0284951	0.0305071	±	0.0136083	0.0392234	±	0.0113228	0.0588351	±	0.0284951	0.0544769	±	0.00998578	0.0522978	±	0.0284951	0.0196117	±	0.0113228	0.0435815	±	0.0199716	0.0414025	±	0.0301942	0.0414025	±	0.0272167	0.0261489	±	0.0172959	0.056656	±	0.0136083	0.0108954	±	0.0136083	0.0239698	±	0.0136083	0.0261489	±
OTU364	Planctomycetes	Planctomycetia	Planctomycetales	Planctomycetaceae	Pirellula	0.0305071	±	0.0210143	0.0217908	±	0.0210143	0.0239698	±	0.0164517	0.0217908	±	0.00998578	0.0174326	±	0.0164517	0.0414025	±	0.00998578	0.0305071	±	0.0199716	0.0370443	±	0.029478	0.0457606	±	0.0130745	0.0348652	±	0.0136083	0.0239698	±	0.0150971	0.0392234	±	0.0196117	0.0326861	±	0.0226456	0.0479397	±	0.0377427	0.0326861	±
OTU769	Firmicutes	Bacilli	Bacillales	Paenibacillaceae_1	Paenibacillus	0.0261489	±	0.0172959	0.0217908	±	0.0136083	0.0152535	±	0.0136083	0.0239698	±	0.00998578	0.0217908	±	0.0136083	0.0217908	±	0.0210143	0.0239698	±	0.00998578	0.0108954	±	0.00754854	0.00871631	±	0.00754854	0.0174326	±	0.00377427	0.0348652	±	0.00377427	0.0108954	±	0.00377427	0.0348652	±	0.043527	0.0130745	±	0.0172959	0.0130745	±
OTU782	Verrucomicrobia	Subdivision3	Subdivision3_unclassified	Subdivision3_unclassified	Subdivision3_unclassified	0.0348652	±	0.0247496	0.0174326	±	0.00754854	0.0348652	±	0.0322474	0.0522978	±	0.0284951	0.0370443	±	0.0247496	0.0348652	±	0.0264199	0.0196117	±	0	0.0152535	±	0.0164517	0.0326861	±	0.0196117	0.0457606	±	0.0172959	0.0174326	±	0.00377427	0.0588351	±	0.0261489	0.0305071	±	0.0164517	0.0326861	±	0.0339684	0.0174326	±
OTU346	Bacteroidetes	Cytophagia	Cytophagales	Ohtaekwangia	Ohtaekwangia_unclassified	0.0348652	±	0.00377427	0.0261489	±	0.0172959	0.0697304	±	0.0308937	0.0522978	±	0.0457606	0.0370443	±	0.0199716	0.028328	±	0.029478	0.0174326	±	0.00377427	0.0196117	±	0.0113228	0.0435815	±	0.0528398	0.0588351	±	0.0363978	0.0435815	±	0.0585924	0.0479397	±	0.043527	0.0414025	±	0.0136083	0.0108954	±	0.00998578	0.0305071	±
OTU419	Verrucomicrobia	Opitutae	Opitutales	Opitutaceae	Opitutus	0.00217908	±	0.00377427	0.00217908	±	0.00377427	0.00653723	±	0.0113228	0.0174326	±	0.0136083	0.00435815	±	0.00754854	0.0130745	±	0.0130745	0.0196117	±	0.0196117	0.00653723	±	0.0113228	0.0217908	±	0.0136083	0.0305071	±	0.0308937	0.0392234	±	0.0226456	0.148177	±	0.164387	0.0610141	±	0.0892358	0.0762677	±	0.0658067	0.056656	±
OTU340	Acidobacteria	Acidobacteria_Gp4	Aridibacter	Aridibacter_unclassified	Aridibacter_unclassified	0.028328	±	0.00998578	0.0261489	±	0.0226456	0.0261489	±	0.0130745	0.0392234	±	0.0235703	0.0653723	±	0.0392234	0.0653723	±	0.0113228	0.0457606	±	0.0196117	0.0522978	±	0.0113228	0.0370443	±	0.0329033	0.028328	±	0.0136083	0.0174326	±	0.00754854	0.0239698	±	0.0199716	0.0370443	±	0.00754854	0.028328	±	0.00377427	0.0435815	±
OTU5964	Proteobacteria	Betaproteobacteria	Rhodocyclales	Rhodocyclaceae	Rhodocyclaceae_unclassified	0.0435815	±	0.0360043	0.0479397	±	0.00754854	0.0479397	±	0.0136083	0.056656	±	0.0210143	0.0435815	±	0.0136083	0.0501188	±	0.0264199	0.0305071	±	0.0188714	0.0457606	±	0.0235703	0.0392234	±	0.00653723	0.0631932	±	0.0322474	0.0326861	±	0.00653723	0.0196117	±	0.00653723	0.0305071	±	0.0210143	0.0217908	±	0.0136083	0.028328	±
OTU255	Proteobacteria	Gammaproteobacteria	Pseudomonadales	Moraxellaceae	Acinetobacter	0	±	0	0	±	0	0.00217908	±	0.00377427	0	±	0	0.00871631	±	0.0150971	0	±	0	0	±	0	0.00435815	±	0.00754854	0.0174326	±	0.0199716	0.0130745	±	0.0130745	0.028328	±	0.0247496	0.0370443	±	0.0420285	0.0806258	±	0.0963733	0.115491	±	0.140867	0.00217908	±
OTU508	Parcubacteria	Parcubacteria_unclassified	Parcubacteria_unclassified	Parcubacteria_unclassified	Parcubacteria_unclassified	0	±	0	0	±	0	0	±	0	0	±	0	0.0108954	±	0.0136083	0.0196117	±	0.0130745	0.0130745	±	0.0172959	0.0261489	±	0.0130745	0.0806258	±	0.0329033	0.0457606	±	0.0345918	0.0937003	±	0.0763299	0.0762677	±	0.043527	0.0740886	±	0.0425339	0.028328	±	0.0264199	0.0326861	±
OTU1237	Proteobacteria	Gammaproteobacteria	Xanthomonadales	Xanthomonadaceae	Xanthomonadaceae_unclassified	0.0348652	±	0.0136083	0.0522978	±	0.00653723	0.0588351	±	0.0113228	0.0370443	±	0.0136083	0.0392234	±	0.0345918	0.0522978	±	0.040825	0.0239698	±	0.0164517	0.0130745	±	0.00653723	0.0261489	±	0.0113228	0.0305071	±	0.0136083	0.0305071	±	0.0264199	0.0239698	±	0.0150971	0.0697304	±	0.0199716	0.00871631	±	0.00998578	0.0174326	±
OTU4794	Proteobacteria	Betaproteobacteria	Burkholderiales	Burkholderiaceae	Cupriavidus	0	±	0	0	±	0	0	±	0	0	±	0	0	±	0	0.00217908	±	0.00377427	0	±	0	0	±	0	0	±	0	0	±	0	0	±	0	0.00653723	±	0.0113228	0.0174326	±	0.0301942	0.00871631	±	0.00377427	0	±
OTU477	Verrucomicrobia	Opitutae	Opitutales	Opitutaceae	Opitutus	0.00435815	±	0.00754854	0	±	0	0.00217908	±	0.00377427	0.00217908	±	0.00377427	0.0479397	±	0.022958	0.0130745	±	0.00653723	0.0435815	±	0.0210143	0.0217908	±	0.00754854	0.0740886	±	0.0335465	0.0479397	±	0.046379	0.0806258	±	0.0420285	0.106775	±	0.0593173	0.0544769	±	0.0335465	0.028328	±	0.00377427	0.0479397	±
OTU594	Actinobacteria	Actinobacteria	Actinomycetales	Streptosporangiaceae	Nonomuraea	0.0174326	±	0.0199716	0.0108954	±	0.00377427	0.028328	±	0.0164517	0.0631932	±	0.0335465	0.0414025	±	0.00377427	0.0457606	±	0.0345918	0.0479397	±	0.0199716	0.0479397	±	0.0555985	0.0588351	±	0.0113228	0.0370443	±	0.022958	0.0392234	±	0.0226456	0.0305071	±	0.0308937	0.028328	±	0.0210143	0.0239698	±	0.00754854	0.0457606	±
OTU612	Verrucomicrobia	Subdivision3	Subdivision3_unclassified	Subdivision3_unclassified	Subdivision3_unclassified	0.00653723	±	0.0113228	0.0196117	±	0.0196117	0.0239698	±	0.0199716	0.0392234	±	0.0172959	0.00653723	±	0.00653723	0.0196117	±	0.0113228	0.0196117	±	0.00653723	0.0261489	±	0.0172959	0.0392234	±	0.00653723	0.106775	±	0.0322474	0.0326861	±	0.0299573	0.056656	±	0.0528398	0.0435815	±	0.0164517	0.0501188	±	0.0394045	0.0130745	±
OTU533	Chloroflexi	Chloroflexi_unclassified	Chloroflexi_unclassified	Chloroflexi_unclassified	Chloroflexi_unclassified	0.0326861	±	0.0235703	0.0326861	±	0.0226456	0.0326861	±	0.0113228	0.0370443	±	0.0199716	0.0522978	±	0.0261489	0.0522978	±	0.0284951	0.0305071	±	0.029478	0.0348652	±	0.00998578	0.0348652	±	0.044498	0.0261489	±	0.0235703	0.0435815	±	0.0164517	0.0348652	±	0.0164517	0.0239698	±	0.0199716	0.0261489	±	0.0284951	0.028328	±
OTU320	Proteobacteria	Gammaproteobacteria	Xanthomonadales	Xanthomonadales_unclassified	Xanthomonadales_unclassified	0.0217908	±	0.00377427	0.0261489	±	0.0113228	0.0435815	±	0.00998578	0.0414025	±	0.0308937	0.0108954	±	0.0188714	0.0348652	±	0.0188714	0.0239698	±	0.0164517	0.0217908	±	0.0210143	0.0653723	±	0.0261489	0.056656	±	0.0329033	0.0958794	±	0.044498	0.0435815	±	0.0164517	0.028328	±	0.0210143	0.0239698	±	0.0136083	0.0261489	±
OTU418	Proteobacteria	Deltaproteobacteria	Myxococcales	Cystobacteraceae	Cystobacter	0.028328	±	0.00998578	0.056656	±	0.0360043	0.0174326	±	0.0136083	0.0305071	±	0.00377427	0.0610141	±	0.0164517	0.0370443	±	0.0272167	0.056656	±	0.00377427	0.0261489	±	0.0172959	0.0435815	±	0.0164517	0.0239698	±	0.0164517	0.0217908	±	0.00998578	0.0326861	±	0.0130745	0.0217908	±	0.00377427	0.0305071	±	0.00377427	0.0501188	±
OTU344	Proteobacteria	Betaproteobacteria	Burkholderiales	Burkholderiaceae	Burkholderiaceae_unclassified	0.00435815	±	0.00377427	0.00653723	±	0.00653723	0.00217908	±	0.00377427	0.00653723	±	0.00653723	0.0544769	±	0.0425339	0.028328	±	0.043527	0.0392234	±	0.0172959	0.0326861	±	0.0226456	0.0174326	±	0.00998578	0.0305071	±	0.0472915	0.0217908	±	0.0136083	0.0370443	±	0.0420285	0.0414025	±	0.0607411	0.0217908	±	0.0164517	0.0326861	±
OTU694	Firmicutes	Bacilli	Bacillales	Paenibacillaceae_1	Paenibacillus	0.00217908	±	0.00377427	0.00435815	±	0.00377427	0.00435815	±	0.00754854	0.0108954	±	0.00754854	0.00871631	±	0.00998578	0.00653723	±	0.0113228	0.0108954	±	0.00377427	0.00435815	±	0.00377427	0.0152535	±	0.00998578	0.0130745	±	0.0113228	0.0152535	±	0.00754854	0	±	0	0.00653723	±	0.00653723	0.0108954	±	0.00754854	0.0130745	±
OTU462	Bacteria_unclassified	Bacteria_unclassified	Bacteria_unclassified	Bacteria_unclassified	Bacteria_unclassified	0.0392234	±	0.0226456	0.0457606	±	0.0113228	0.0610141	±	0.0164517	0.0392234	±	0.0113228	0.0522978	±	0.0299573	0.0435815	±	0.0164517	0.0239698	±	0.0210143	0.028328	±	0.0150971	0.0152535	±	0.00754854	0.0435815	±	0.0164517	0.0217908	±	0.0210143	0.0326861	±	0.0284951	0.0130745	±	0.00653723	0.0196117	±	0.0172959	0.0435815	±
OTU577	Bacteria_unclassified	Bacteria_unclassified	Bacteria_unclassified	Bacteria_unclassified	Bacteria_unclassified	0.00653723	±	0.00653723	0.0196117	±	0.0196117	0.0305071	±	0.0136083	0.0370443	±	0.0164517	0.0653723	±	0.0235703	0.0479397	±	0.0264199	0.0152535	±	0.00998578	0.0152535	±	0.0136083	0.0501188	±	0.00998578	0.0631932	±	0.00998578	0.0414025	±	0.0199716	0.0457606	±	0.0345918	0.0174326	±	0.00754854	0.0414025	±	0.0264199	0.0348652	±
OTU551	Actinobacteria	Actinobacteria	Actinomycetales	Micromonosporaceae	Virgisporangium	0.0261489	±	0.0172959	0.0305071	±	0.0164517	0.0740886	±	0.0383047	0.0610141	±	0.0199716	0.056656	±	0.0247496	0.0348652	±	0.0210143	0.0152535	±	0.0210143	0.0348652	±	0.0164517	0.0217908	±	0.0199716	0.0196117	±	0.0113228	0.0305071	±	0.0329033	0.0392234	±	0.0130745	0.0152535	±	0.0210143	0.0239698	±	0.0199716	0.0239698	±
OTU306	Planctomycetes	Planctomycetia	Planctomycetales	Planctomycetaceae	Planctomycetaceae_unclassified	0.0261489	±	0.00653723	0.0239698	±	0.0188714	0.0217908	±	0.0210143	0.0435815	±	0.0247496	0.0370443	±	0.0150971	0.0348652	±	0.0164517	0.028328	±	0.00998578	0.0152535	±	0.0136083	0.028328	±	0.0150971	0.0479397	±	0.0322474	0.0152535	±	0.00377427	0.0479397	±	0.0199716	0.0457606	±	0.040825	0.0108954	±	0.00754854	0.0305071	±
OTU376	Firmicutes	Bacilli	Bacillales	Bacillaceae_1	Bacillus	0.0544769	±	0.0420285	0.0196117	±	0.0130745	0.0130745	±	0.0130745	0.0305071	±	0.0210143	0.0392234	±	0.00653723	0.0196117	±	0.0113228	0.0479397	±	0.0188714	0.0588351	±	0.0196117	0.0762677	±	0.0532426	0.028328	±	0.00998578	0.0544769	±	0.043527	0.0261489	±	0.0130745	0.0152535	±	0.0264199	0.028328	±	0.0272167	0.0435815	±
OTU530	Acidobacteria	Acidobacteria_Gp16	Gp16	Gp16_unclassified	Gp16_unclassified	0.0479397	±	0.00998578	0.0217908	±	0.00998578	0.0370443	±	0.022958	0.0348652	±	0.00998578	0.0610141	±	0.0264199	0.0653723	±	0.0326861	0.0305071	±	0.0371723	0.0457606	±	0.0235703	0.0152535	±	0.00377427	0.0435815	±	0.0360043	0.0370443	±	0.00377427	0.0261489	±	0.0130745	0.0174326	±	0.0136083	0.0305071	±	0.0264199	0.0370443	±
OTU256	Chloroflexi	Chloroflexia	Chloroflexales	Chloroflexales_unclassified	Chloroflexales_unclassified	0.0522978	±	0.0452913	0.0174326	±	0.00754854	0.0326861	±	0.0172959	0.0414025	±	0.022958	0.0697304	±	0.00998578	0.0653723	±	0.0363978	0.0631932	±	0.0164517	0.0544769	±	0.0383047	0.0457606	±	0.00653723	0.0305071	±	0.00754854	0.0217908	±	0.00377427	0.028328	±	0.029478	0.0130745	±	2.12459e-18	0.0392234	±	0.0261489	0.0261489	±
OTU3492	Proteobacteria	Alphaproteobacteria	Rhizobiales	Rhizobiales_unclassified	Rhizobiales_unclassified	0.00871631	±	0.0150971	0.00435815	±	0.00377427	0	±	0	0.00217908	±	0.00377427	0.0261489	±	0.0113228	0.0261489	±	0.0172959	0.0631932	±	0.0472915	0.0239698	±	0.00754854	0.0784468	±	0.0663456	0.0544769	±	0.0720085	0.0348652	±	0.0164517	0.0174326	±	0.0247496	0.0370443	±	0.0272167	0.0610141	±	0.0774416	0.0239698	±
OTU319	Proteobacteria	Gammaproteobacteria	Xanthomonadales	Xanthomonadaceae	Arenimonas	0.0610141	±	0.0308937	0.0762677	±	0.0322474	0.0980584	±	0.0569902	0.0675514	±	0.0164517	0.0435815	±	0.00998578	0.0392234	±	0.0113228	0.0326861	±	0.0113228	0.028328	±	0.0136083	0.0130745	±	0.0113228	0.0631932	±	0.0481867	0.0305071	±	0.0188714	0.0174326	±	0.00754854	0.00871631	±	0.00754854	0.0196117	±	0.0172959	0.0217908	±
OTU303	Chloroflexi	Thermomicrobia	Sphaerobacterales	Sphaerobacteraceae	Sphaerobacter	0.0392234	±	0.0130745	0.0370443	±	0.0136083	0.0740886	±	0.00998578	0.0457606	±	0.0113228	0.0784468	±	0.0471406	0.0501188	±	0.0164517	0.0414025	±	0.029478	0.0522978	±	0.049355	0.0414025	±	0.0150971	0.0414025	±	0.0188714	0.0305071	±	0.0164517	0.0108954	±	0.00998578	0.0239698	±	0.0264199	0.0108954	±	0.0188714	0.0217908	±
OTU478	Actinobacteria	Actinobacteria	Acidimicrobiales	Acidimicrobiaceae	Ilumatobacter	0.0479397	±	0.0164517	0.0893421	±	0.0136083	0.056656	±	0.029478	0.084984	±	0.0339684	0.0457606	±	0.0113228	0.0457606	±	0.0172959	0.0522978	±	0.0299573	0.0457606	±	0.0345918	0.0261489	±	0.0130745	0.0370443	±	0.0150971	0.0108954	±	0.0136083	0.0196117	±	0.0172959	0.0261489	±	0.0172959	0.0196117	±	0.00653723	0.00653723	±
OTU728	Proteobacteria	Betaproteobacteria	Burkholderiales	Burkholderiales_unclassified	Burkholderiales_unclassified	0.0152535	±	0.00998578	0.0108954	±	0.00754854	0.0130745	±	0.00653723	0.0217908	±	0.0199716	0.0152535	±	0.00998578	0.028328	±	0.0199716	0.00217908	±	0.00377427	0.0261489	±	0.0130745	0.0305071	±	0.0420285	0.0217908	±	0.0164517	0.0217908	±	0.0199716	0.0152535	±	0.0210143	0.0828049	±	0.126818	0.0588351	±	0.0518877	0.0130745	±
OTU626	Gemmatimonadetes	Gemmatimonadetes	Gemmatimonadales	Gemmatimonadaceae	Gemmatimonas	0.0196117	±	0.00653723	0.0370443	±	0.00754854	0.0261489	±	0.0261489	0.0261489	±	0.0113228	0.0261489	±	0.0113228	0.0217908	±	0.0164517	0.0348652	±	0.029478	0.0414025	±	0.022958	0.0479397	±	0.0210143	0.0392234	±	0.0130745	0.0305071	±	0.0164517	0.0239698	±	0.00998578	0.0326861	±	0.0235703	0.0130745	±	0.0130745	0.0588351	±
OTU1133	Gemmatimonadetes	Gemmatimonadetes	Gemmatimonadales	Gemmatimonadaceae	Gemmatimonas	0.0457606	±	0.0172959	0.0392234	±	0.0130745	0.0348652	±	0.029478	0.0457606	±	0.0261489	0.0893421	±	0.0925274	0.0348652	±	0.00377427	0.0457606	±	0.0397644	0.0479397	±	0.0210143	0.0217908	±	0.00998578	0.0326861	±	0.0235703	0.0239698	±	0.0308937	0.0370443	±	0.0308937	0.0348652	±	0.0322474	0.0239698	±	0.0247496	0.0217908	±
OTU4845	Actinobacteria	Actinobacteria	Actinomycetales	Actinomycetales_unclassified	Actinomycetales_unclassified	0.0784468	±	0.0392234	0.0435815	±	0.0377427	0.0370443	±	0.029478	0.0348652	±	0.022958	0.0501188	±	0.0210143	0.0196117	±	0.0130745	0.0261489	±	0.0172959	0.0588351	±	0.0566141	0.0544769	±	0.0603883	0.0217908	±	0.00998578	0.0522978	±	0.0643842	0.00435815	±	0.00377427	0.0174326	±	0.00754854	0.0435815	±	0.0371723	0.0958794	±
OTU298	Firmicutes	Clostridia	Clostridiales	Clostridiaceae_1	Clostridium_sensu_stricto	0.0740886	±	0.0654812	0.028328	±	0.022958	0.0392234	±	0.0130745	0.0174326	±	0.00377427	0.028328	±	0.0188714	0.0261489	±	0.0172959	0.0828049	±	0.0507776	0.0370443	±	0.00754854	0.0174326	±	0.0247496	0.0152535	±	0.0136083	0.0828049	±	0.0628164	0.0261489	±	4.24919e-18	0.0196117	±	0.0235703	0.0261489	±	0.0397644	0.0610141	±
OTU1180	Proteobacteria	Betaproteobacteria	Burkholderiales	Oxalobacteraceae	Massilia	0.124207	±	0.0707109	0.111133	±	0.0196117	0.119849	±	0.0371723	0.143819	±	0.0113228	0.00871631	±	0.00377427	0.0130745	±	2.12459e-18	0.0217908	±	0.00377427	0.0196117	±	0.0284951	0.0130745	±	0.0226456	0.0174326	±	0.00998578	0.0152535	±	0.00377427	0.00653723	±	0.00653723	0.0370443	±	0.0420285	0.0239698	±	0.00377427	0.0152535	±
OTU435	Proteobacteria	Deltaproteobacteria	Myxococcales	Phaselicystidaceae	Phaselicystis	0.0392234	±	0.0235703	0.0305071	±	0.0150971	0.0392234	±	0.0172959	0.0479397	±	0.0272167	0.0326861	±	0.00653723	0.0348652	±	0.0136083	0.0544769	±	0.0264199	0.028328	±	0.0136083	0.0457606	±	0.0235703	0.0326861	±	0.0130745	0.0130745	±	0.00653723	0.0392234	±	0.0196117	0.0108954	±	0.00754854	0.0239698	±	0.0150971	0.00653723	±
OTU402	Proteobacteria	Alphaproteobacteria	Alphaproteobacteria_incertae_sedis	Geminicoccus	Geminicoccus_unclassified	0.0392234	±	0.00653723	0.0239698	±	0.0136083	0.0152535	±	0.00377427	0.0435815	±	0.0264199	0.0326861	±	0.00653723	0.0326861	±	0.0113228	0.0653723	±	0.0345918	0.0305071	±	0.0136083	0.0174326	±	0.0150971	0.0435815	±	0.0210143	0.0392234	±	0.0172959	0.0196117	±	0.0113228	0.0196117	±	0.0130745	0.0239698	±	0.0199716	0.0370443	±
OTU305	Proteobacteria	Gammaproteobacteria	Chromatiales	Chromatiales_unclassified	Chromatiales_unclassified	0.0305071	±	0.0247496	0.0217908	±	0.00377427	0.0370443	±	0.0301942	0.056656	±	0.041517	0.0457606	±	0.0113228	0.0326861	±	0.0130745	0.0305071	±	0.0164517	0.0370443	±	0.0164517	0.0305071	±	0.0136083	0.0392234	±	0.0113228	0.0370443	±	0.00998578	0.0479397	±	0.043527	0.0414025	±	0.0199716	0.0152535	±	0.00998578	0.0239698	±
OTU287	Chloroflexi	Chloroflexi_unclassified	Chloroflexi_unclassified	Chloroflexi_unclassified	Chloroflexi_unclassified	0.0239698	±	0.00998578	0.0217908	±	0.022958	0.0348652	±	0.00998578	0.0152535	±	0.00377427	0.0196117	±	0.0196117	0.0392234	±	0.0172959	0.0348652	±	0.0377427	0.0457606	±	0.0196117	0.056656	±	0.00998578	0.0414025	±	0.029478	0.0544769	±	0.0210143	0.0305071	±	0.0150971	0.0196117	±	0.0172959	0.0305071	±	0.0272167	0.0479397	±
OTU467	Proteobacteria	Deltaproteobacteria	Myxococcales	Polyangiaceae	Polyangiaceae_unclassified	0.00871631	±	0.00377427	0.0435815	±	0.00377427	0.0196117	±	0.00653723	0.0261489	±	0.0261489	0.0239698	±	0.00998578	0.0152535	±	0.0210143	0.0239698	±	0.022958	0.0174326	±	0.00754854	0.0348652	±	0.0308937	0.0370443	±	0.0164517	0.0631932	±	0.00377427	0.0457606	±	0.0452913	0.0305071	±	0.0247496	0.0522978	±	0.0172959	0.0522978	±
OTU368	Planctomycetes	Planctomycetia	Planctomycetales	Planctomycetaceae	Zavarzinella	0.0239698	±	0.00998578	0.0370443	±	0.0199716	0.0348652	±	0.0164517	0.0261489	±	0.0226456	0.0479397	±	0.0335465	0.0435815	±	0.0188714	0.0392234	±	0.0299573	0.0501188	±	0.0322474	0.0196117	±	0.0196117	0.028328	±	0.00377427	0.0370443	±	0.0136083	0.0435815	±	0.022958	0.0196117	±	0.0130745	0.0435815	±	0.0264199	0.0196117	±
OTU798	Planctomycetes	Planctomycetia	Planctomycetales	Planctomycetaceae	Zavarzinella	0.0326861	±	0.00653723	0.028328	±	0.0136083	0.0435815	±	0.0210143	0.0305071	±	0.0150971	0.0217908	±	0.00998578	0.0239698	±	0.0164517	0.0392234	±	0.0130745	0.0239698	±	0.00998578	0.0305071	±	0.0136083	0.0174326	±	0.00998578	0.0326861	±	0.0196117	0.0348652	±	0.0199716	0.0305071	±	0.0329033	0.0326861	±	0.00653723	0.0108954	±
OTU1568	Proteobacteria	Betaproteobacteria	Burkholderiales	Burkholderiales_unclassified	Burkholderiales_unclassified	0.0261489	±	0.0130745	0.0370443	±	0.0150971	0.0174326	±	0.0188714	0.0370443	±	0.022958	0.0522978	±	0.0284951	0.0196117	±	0.0113228	0.0348652	±	0.0272167	0.0414025	±	0.00998578	0.0370443	±	0.00754854	0.0108954	±	0.00377427	0.0435815	±	0.0150971	0.0414025	±	0.0360043	0.0174326	±	0.0150971	0.0326861	±	0.00653723	0.0174326	±
OTU322	candidate_division_WPS-1	candidate_division_WPS-1_unclassified	candidate_division_WPS-1_unclassified	candidate_division_WPS-1_unclassified	candidate_division_WPS-1_unclassified	0.0305071	±	0.022958	0.028328	±	0.0247496	0.0217908	±	0.0164517	0.0457606	±	0.0235703	0.0261489	±	0.00653723	0.0217908	±	0.00377427	0.056656	±	0.0308937	0.0326861	±	0.00653723	0.0196117	±	0.0113228	0.0108954	±	0.00377427	0.0305071	±	0.0164517	0.0305071	±	0.022958	0.0261489	±	0.0130745	0.0261489	±	0.0172959	0.0370443	±
OTU285	Proteobacteria	Deltaproteobacteria	Myxococcales	Kofleriaceae	Kofleria	0.028328	±	0.0164517	0.0370443	±	0.00377427	0.0522978	±	0.0130745	0.0588351	±	0.0363978	0.0348652	±	0.00998578	0.0457606	±	0.0299573	0.0217908	±	0.0322474	0.0414025	±	0.0150971	0.0457606	±	0.0235703	0.0370443	±	0.0210143	0.0326861	±	0.0345918	0.0305071	±	0.0164517	0.0196117	±	0.0130745	0.00653723	±	1.0623e-18	0.0239698	±
OTU370	Candidatus_Saccharibacteria	Candidatus_Saccharibacteria_unclassified	Candidatus_Saccharibacteria_unclassified	Candidatus_Saccharibacteria_unclassified	Candidatus_Saccharibacteria_unclassified	0	±	0	0	±	0	0	±	0	0	±	0	0.00653723	±	0.00653723	0.00653723	±	0.0113228	0.00653723	±	0.00653723	0.0435815	±	0.0420285	0.0196117	±	0.0339684	0.132924	±	0.130799	0.0239698	±	0.0308937	0.0915212	±	0.0770728	0.0305071	±	0.0188714	0.0239698	±	0.0150971	0.028328	±
OTU253	Proteobacteria	Deltaproteobacteria	Deltaproteobacteria_unclassified	Deltaproteobacteria_unclassified	Deltaproteobacteria_unclassified	0.00217908	±	0.00377427	0	±	0	0	±	0	0	±	0	0	±	0	0	±	0	0	±	0	0	±	0	0.00653723	±	0.0113228	0.00217908	±	0.00377427	0.0675514	±	0.105882	0.0326861	±	0.0566141	0.0108954	±	0.0188714	0.0392234	±	0.0428675	0.0784468	±
OTU512	Actinobacteria	Actinobacteria	Acidimicrobiales	Acidimicrobineae_incertae_sedis	Aciditerrimonas	0.0239698	±	0.00998578	0.0392234	±	0.0235703	0.0871631	±	0.0308937	0.0522978	±	0.0428675	0.0522978	±	0.0130745	0.028328	±	0.00377427	0.0108954	±	0.00998578	0.0261489	±	0.00653723	0.0152535	±	0.0164517	0.0348652	±	0.0164517	0.0370443	±	0.0264199	0.0152535	±	0.00754854	0.0174326	±	0.00377427	0.0152535	±	0.0150971	0.0217908	±
OTU702	Proteobacteria	Alphaproteobacteria	Rhizobiales	Phyllobacteriaceae	Phyllobacteriaceae_unclassified	0.0239698	±	0.0199716	0.0370443	±	0.00998578	0.00871631	±	0.00377427	0.0326861	±	0.0172959	0.0108954	±	0.00754854	0.0239698	±	0.00998578	0.028328	±	0.00998578	0.0196117	±	0.0113228	0.0392234	±	0.0172959	0.028328	±	0.00377427	0.0196117	±	0.0113228	0.0152535	±	0.00377427	0.028328	±	0.0150971	0.0326861	±	0.0363978	0.0348652	±
OTU412	Planctomycetes	Planctomycetia	Planctomycetales	Planctomycetaceae	Blastopirellula	0.0239698	±	0.0136083	0.0196117	±	0.00653723	0.0305071	±	0.0164517	0.0196117	±	0.0172959	0.0370443	±	0.0247496	0.0631932	±	0.0210143	0.0326861	±	0.0339684	0.0370443	±	0.00377427	0.0457606	±	0.0428675	0.0610141	±	0.0210143	0.0370443	±	0.0136083	0.0588351	±	0.0397644	0.0130745	±	0.0172959	0.0217908	±	0.0210143	0.0261489	±
OTU1844	Proteobacteria	Alphaproteobacteria	Rhizobiales	Hyphomicrobiaceae	Pedomicrobium	0.0370443	±	0.0210143	0.0196117	±	0.00653723	0.0196117	±	0.0130745	0.0217908	±	0.00998578	0.0392234	±	0.0299573	0.0261489	±	0.0113228	0.0261489	±	0.0172959	0.00871631	±	0.00377427	0.0544769	±	0.0383047	0.0392234	±	0.0130745	0.0435815	±	0.0150971	0.0370443	±	0.0199716	0.00871631	±	0.00377427	0.0217908	±	0.00754854	0.0392234	±
OTU410	Actinobacteria	Actinobacteria	Actinobacteria_unclassified	Actinobacteria_unclassified	Actinobacteria_unclassified	0.0326861	±	0.0196117	0.0239698	±	0.0210143	0.0217908	±	0.00754854	0.0305071	±	0.00377427	0.0370443	±	0.041517	0.028328	±	0.00754854	0.0414025	±	0.00377427	0.0326861	±	0.0235703	0.0392234	±	0.0363978	0.0174326	±	0.0199716	0.0479397	±	0.0164517	0.0326861	±	0.0172959	0.0196117	±	0.0284951	0.0174326	±	0.0136083	0.028328	±
OTU472	Proteobacteria	Gammaproteobacteria	Xanthomonadales	Xanthomonadaceae	Lysobacter	0.00653723	±	0.00653723	0.0108954	±	0.0188714	0.0108954	±	0.00754854	0.00435815	±	0.00377427	0.0174326	±	0.0136083	0.0196117	±	0.00653723	0.00435815	±	0.00754854	0.00435815	±	0.00377427	0.174326	±	0.301942	0.00217908	±	0.00377427	0.0152535	±	0.0164517	0.0108954	±	0.00998578	0.00653723	±	1.0623e-18	0.0130745	±	0.0172959	0.0414025	±
OTU576	Chloroflexi	Anaerolineae	Anaerolineales	Anaerolineaceae	Anaerolineaceae_unclassified	0.0435815	±	0.022958	0.0217908	±	0.0210143	0.0414025	±	0.0150971	0.0239698	±	0.0247496	0.028328	±	0.0136083	0.0435815	±	0.00754854	0.0392234	±	0.0457606	0.0370443	±	0.0264199	0.0261489	±	0.0172959	0.0305071	±	0.00377427	0.028328	±	0.0136083	0.0305071	±	0.00998578	0.0305071	±	0.00998578	0.0261489	±	0.0261489	0.0326861	±
OTU545	Acidobacteria	Acidobacteria_Gp6	Gp6	Gp6_unclassified	Gp6_unclassified	0.0305071	±	0.00998578	0.0174326	±	0.00377427	0.0414025	±	0.0322474	0.0414025	±	0.0199716	0.0217908	±	0.00754854	0.0348652	±	0.0272167	0.0174326	±	0.00754854	0.0261489	±	0.0226456	0.0305071	±	0.00754854	0.0588351	±	0.0130745	0.0544769	±	0.0272167	0.0261489	±	4.24919e-18	0.0217908	±	0.00377427	0.0305071	±	0.0247496	0.0305071	±
OTU2029	Candidatus_Saccharibacteria	Candidatus_Saccharibacteria_unclassified	Candidatus_Saccharibacteria_unclassified	Candidatus_Saccharibacteria_unclassified	Candidatus_Saccharibacteria_unclassified	0.0348652	±	0.0164517	0.0174326	±	0.00754854	0.0130745	±	0.0172959	0.0261489	±	0.0172959	0.0217908	±	0.0210143	0.0261489	±	0.0261489	0.0414025	±	0.0371723	0.0370443	±	0.0164517	0.0152535	±	0.00377427	0.0457606	±	0.049355	0.0261489	±	0.0172959	0.0152535	±	0.0136083	0.0501188	±	0.0210143	0.0479397	±	0.0329033	0.0414025	±
OTU369	Proteobacteria	Alphaproteobacteria	Alphaproteobacteria_incertae_sedis	Geminicoccus	Geminicoccus_unclassified	0.0392234	±	0.0345918	0.0305071	±	0.022958	0.0457606	±	0.0226456	0.0239698	±	0.00998578	0.0108954	±	0.00377427	0.0130745	±	0.00653723	0.0370443	±	0.00998578	0.00653723	±	1.0623e-18	0.0174326	±	0.0199716	0.0392234	±	0.00653723	0.0261489	±	0.00653723	0.0457606	±	0.0299573	0.0501188	±	0.041517	0.0239698	±	0.00998578	0.0130745	±
OTU321	Verrucomicrobia	Subdivision3	Subdivision3_unclassified	Subdivision3_unclassified	Subdivision3_unclassified	0.00871631	±	0.00998578	0.0196117	±	0.0113228	0.0152535	±	0.00377427	0.00435815	±	0.00754854	0.0217908	±	0.0272167	0.0239698	±	0.0188714	0.0152535	±	0.0210143	0.0239698	±	0.0150971	0.0370443	±	0.0247496	0.0522978	±	0.0113228	0.0544769	±	0.0164517	0.0457606	±	0.0299573	0.0305071	±	0.0199716	0.0261489	±	0.0130745	0.0370443	±
OTU720	Actinobacteria	Actinobacteria	Acidimicrobiales	Acidimicrobineae_incertae_sedis	Aciditerrimonas	0.0414025	±	0.0136083	0.0479397	±	0.0329033	0.028328	±	0.00998578	0.0501188	±	0.00998578	0.0326861	±	0.0113228	0.028328	±	0.00754854	0.0326861	±	0.0172959	0.0174326	±	0.0164517	0.0239698	±	0.00998578	0.0392234	±	0.0326861	0.0305071	±	0.0136083	0.0348652	±	0.0210143	0.0152535	±	0.00754854	0.028328	±	0.022958	0.0239698	±
OTU793	Acidobacteria	Acidobacteria_Gp17	Gp17	Gp17_unclassified	Gp17_unclassified	0.0217908	±	0.0150971	0.00217908	±	0.00377427	0	±	0	0.0130745	±	0.00653723	0.028328	±	0.00998578	0.0348652	±	0.0164517	0.0261489	±	0.0235703	0.028328	±	0.00998578	0.0305071	±	0.0308937	0.0522978	±	0.0363978	0.0392234	±	0.0113228	0.0305071	±	0.0136083	0.0305071	±	0.0272167	0.0522978	±	0.00653723	0.0501188	±
OTU269	Acidobacteria	Acidobacteria_Gp3	Gp3	Gp3_unclassified	Gp3_unclassified	0.0261489	±	0.0130745	0.0457606	±	0.0452913	0.0174326	±	0.00377427	0.0196117	±	0.00653723	0.0152535	±	0.0164517	0.0501188	±	0.0472915	0.0152535	±	0.00377427	0.0174326	±	0.00998578	0.0414025	±	0.0264199	0.0196117	±	0.0284951	0.0457606	±	0.0130745	0.0108954	±	0.0188714	0.0305071	±	0.022958	0.028328	±	0.0150971	0.0261489	±
OTU390	Bacteroidetes	Flavobacteriia	Flavobacteriales	Flavobacteriaceae	Flavobacterium	0	±	0	0	±	0	0	±	0	0	±	0	0.00435815	±	0.00377427	0	±	0	0	±	0	0	±	0	0	±	0	0	±	0	0	±	0	0.00217908	±	0.00377427	0.00435815	±	0.00377427	0	±	0	0	±
OTU385	Firmicutes	Firmicutes_unclassified	Firmicutes_unclassified	Firmicutes_unclassified	Firmicutes_unclassified	0.0239698	±	0.0150971	0.028328	±	0.0150971	0.0152535	±	0.0136083	0.0196117	±	0.0235703	0.0414025	±	0.0136083	0.0479397	±	0.0548245	0.0610141	±	0.0548245	0.0501188	±	0.0371723	0.0479397	±	0.0164517	0.0239698	±	0.00998578	0.0239698	±	0.0247496	0.0196117	±	0.0235703	0.0348652	±	0.0199716	0.0370443	±	0.00998578	0.0588351	±
OTU342	Planctomycetes	Planctomycetia	Planctomycetales	Planctomycetaceae	Pirellula	0.0196117	±	0.0113228	0.028328	±	0.00377427	0.0217908	±	0.00998578	0.0174326	±	0.00998578	0.0239698	±	0.00754854	0.0305071	±	0.00998578	0.0414025	±	0.0308937	0.0261489	±	0.00653723	0.0414025	±	0.0264199	0.0326861	±	0.0130745	0.028328	±	0.0164517	0.0239698	±	0.0199716	0.0261489	±	0.0172959	0.0479397	±	0.0272167	0.0370443	±
OTU966	Planctomycetes	Planctomycetia	Planctomycetales	Planctomycetaceae	Planctomycetaceae_unclassified	0.0239698	±	0.0136083	0.0217908	±	0.0210143	0.0261489	±	0.0113228	0.0326861	±	0.0130745	0.0239698	±	0.0308937	0.0326861	±	0.0113228	0.0326861	±	0.0566141	0.028328	±	0.00998578	0.0239698	±	0.0136083	0.0261489	±	0.00653723	0.0370443	±	0.0322474	0.028328	±	0.0272167	0.0196117	±	0.0130745	0.0370443	±	0.0136083	0.0196117	±
OTU360	Proteobacteria	Gammaproteobacteria	Xanthomonadales	Sinobacteraceae	Povalibacter	0.0435815	±	0.0394045	0.0305071	±	0.00377427	0.0174326	±	0.00377427	0.0392234	±	0.0284951	0.0239698	±	0.0150971	0.0501188	±	0.00998578	0.0305071	±	0.0164517	0.0305071	±	0.0164517	0.0370443	±	0.00754854	0.0130745	±	0.0113228	0.0261489	±	0.0113228	0.0348652	±	0.0188714	0.0196117	±	0.0339684	0.0196117	±	0.0130745	0.0414025	±
OTU5124	Proteobacteria	Alphaproteobacteria	Rhizobiales	Methylocystaceae	Methylocystis	0.0435815	±	0.0329033	0.0501188	±	0.043527	0.0457606	±	0.0284951	0.0697304	±	0.0641626	0.0326861	±	0.00653723	0.0479397	±	0.0308937	0.0414025	±	0.0308937	0.0435815	±	0.00998578	0.0305071	±	0.00998578	0.0196117	±	0.00653723	0.0217908	±	0.00754854	0.0305071	±	0.0308937	0.0108954	±	0.00754854	0.0479397	±	0.0210143	0.028328	±
OTU350	Acidobacteria	Acidobacteria_Gp4	Aridibacter	Aridibacter_unclassified	Aridibacter_unclassified	0.0588351	±	0.0510574	0.0631932	±	0.029478	0.0697304	±	0.0399431	0.0435815	±	0.00998578	0.0217908	±	0.00377427	0.0217908	±	0.00998578	0.0392234	±	0.0130745	0.0370443	±	0.029478	0.0174326	±	0.00377427	0.0305071	±	0.0150971	0.028328	±	0.0136083	0.028328	±	0.0210143	0.0326861	±	0.0172959	0.0326861	±	0.0299573	0.0326861	±
OTU352	Planctomycetes	Planctomycetia	Planctomycetales	Planctomycetaceae	Planctomycetaceae_unclassified	0.0174326	±	0.00998578	0.0348652	±	0.044498	0.0217908	±	0.0150971	0.0261489	±	0.0172959	0.028328	±	0.00377427	0.0196117	±	0.0130745	0.0414025	±	0.00377427	0.0174326	±	0.00754854	0.00653723	±	0.00653723	0.0196117	±	0.00653723	0.028328	±	0.0164517	0.056656	±	0.0264199	0.0305071	±	0.0371723	0.0435815	±	0.0264199	0.0305071	±
OTU358	Bacteroidetes	Bacteroidetes_unclassified	Bacteroidetes_unclassified	Bacteroidetes_unclassified	Bacteroidetes_unclassified	0.0239698	±	0.00754854	0.0130745	±	0.00653723	0.0108954	±	0.00754854	0.0217908	±	0.00377427	0.028328	±	0.0164517	0.028328	±	0.00998578	0.0196117	±	0.0113228	0.028328	±	0.0150971	0.00871631	±	0.00998578	0.0174326	±	0.0164517	0.0152535	±	0.0136083	0.0217908	±	0.0272167	0.0326861	±	0.0113228	0.0370443	±	0.0264199	0.0348652	±
OTU676	Planctomycetes	Planctomycetia	Planctomycetales	Planctomycetaceae	Thermogutta	0.0108954	±	0.0136083	0.0152535	±	0.00377427	0.0305071	±	0.00377427	0.0239698	±	0.022958	0.0174326	±	0.00754854	0.0348652	±	0.0264199	0.0435815	±	0.0164517	0.0239698	±	0.0247496	0.0261489	±	0.00653723	0.0479397	±	0.0360043	0.0348652	±	0.0247496	0.0631932	±	0.043527	0.0348652	±	0.0188714	0.0326861	±	0.00653723	0.0501188	±
OTU295	Verrucomicrobia	Spartobacteria	Spartobacteria_unclassified	Spartobacteria_unclassified	Spartobacteria_unclassified	0.0457606	±	0.0345918	0.0130745	±	0.0172959	0.0217908	±	0.00998578	0.0479397	±	0.0164517	0.0348652	±	0.0136083	0.0217908	±	0.00998578	0.0261489	±	0.0172959	0.0152535	±	0.00754854	0.0239698	±	0.0199716	0.0501188	±	0.0472915	0.0392234	±	0.0172959	0.0392234	±	0.0172959	0.00435815	±	0.00754854	0.0217908	±	0.0272167	0.00871631	±
OTU1169	Acidobacteria	Acidobacteria_Gp16	Gp16	Gp16_unclassified	Gp16_unclassified	0.0544769	±	0.0150971	0.0370443	±	0.0136083	0.0588351	±	0.0226456	0.0414025	±	0.022958	0.0261489	±	0.00653723	0.0305071	±	0.0150971	0.0174326	±	0.00377427	0.0196117	±	0.0113228	0.0326861	±	0.00653723	0.056656	±	0.0136083	0.0435815	±	0.00998578	0.0414025	±	0.0164517	0.0348652	±	0.0264199	0.0370443	±	0.0136083	0.0174326	±
OTU429	Proteobacteria	Deltaproteobacteria	Myxococcales	Sandaracinaceae	Sandaracinus	0.0370443	±	0.00998578	0.0479397	±	0.00998578	0.0305071	±	0.00998578	0.0326861	±	0.0172959	0.0348652	±	0.0272167	0.0305071	±	0.00998578	0.0653723	±	0.0392234	0.0392234	±	0.00653723	0.0261489	±	0.0299573	0.0174326	±	0.0188714	0.0196117	±	0.00653723	0.0588351	±	0.00653723	0.0130745	±	0.0113228	0.0239698	±	0.00998578	0.0174326	±
OTU8317	Proteobacteria	Alphaproteobacteria	Rhizobiales	Rhizobiaceae	Rhizobiaceae_unclassified	0.0196117	±	0.0196117	0.00871631	±	0.00998578	0.00653723	±	0.0113228	0.0762677	±	0.120953	0.0196117	±	0.00653723	0.0130745	±	0.0130745	0.0305071	±	0.0247496	0.028328	±	0.00998578	0.0239698	±	0.00998578	0.0108954	±	0.0136083	0.00871631	±	0.00377427	0.0130745	±	0.00653723	0.0326861	±	0.0196117	0.0544769	±	0.0383047	0.0326861	±
OTU543	Proteobacteria	Betaproteobacteria	Burkholderiales	Comamonadaceae	Hydrogenophaga	0.00435815	±	0.00754854	0.00217908	±	0.00377427	0	±	0	0	±	0	0.0457606	±	0.00653723	0.0261489	±	0.00653723	0.0740886	±	0.0264199	0.056656	±	0.0136083	0.0501188	±	0.0272167	0.0370443	±	0.022958	0.028328	±	0.00998578	0.0152535	±	0.0264199	0.0326861	±	0	0.0610141	±	0.0555985	0.0784468	±
OTU542	Actinobacteria	Actinobacteria	Acidimicrobiales	Acidimicrobiales_unclassified	Acidimicrobiales_unclassified	0.028328	±	0.00998578	0.0501188	±	0.0164517	0.0414025	±	0.029478	0.0414025	±	0.0322474	0.0544769	±	0.0199716	0.0435815	±	0.00377427	0.0435815	±	0.0264199	0.0261489	±	0.00653723	0.0130745	±	0.0113228	0.0305071	±	0.00998578	0.0348652	±	0.00998578	0.0261489	±	0.0261489	0.0108954	±	0.00377427	0.0261489	±	0.00653723	0.0305071	±
OTU827	Proteobacteria	Gammaproteobacteria	Xanthomonadales	Xanthomonadaceae	Arenimonas	0.0457606	±	0.0392234	0.0544769	±	0.00377427	0.0610141	±	0.0150971	0.0414025	±	0.00998578	0.0196117	±	0.0172959	0.0501188	±	0.0371723	0.0196117	±	0.0284951	0.0305071	±	0.0199716	0.0305071	±	0.0164517	0.0305071	±	0.00377427	0.0414025	±	0.00377427	0.0108954	±	0.00377427	0.0174326	±	0.00998578	0.0479397	±	0.0548245	0.0217908	±
OTU405	Firmicutes	Clostridia	Clostridiales	Clostridiaceae_1	Clostridiaceae_1_unclassified	0.0348652	±	0.00998578	0.0196117	±	0.0172959	0.0479397	±	0.00754854	0.028328	±	0.00998578	0.0217908	±	0.00998578	0.0305071	±	0.00754854	0.0370443	±	0.0164517	0.0217908	±	0.00377427	0.0174326	±	0.00754854	0.0152535	±	0.00377427	0.0196117	±	0.00653723	0.0261489	±	0.0235703	0.028328	±	0.0150971	0.0435815	±	0.0371723	0.0305071	±
OTU377	Bacteria_unclassified	Bacteria_unclassified	Bacteria_unclassified	Bacteria_unclassified	Bacteria_unclassified	0.0544769	±	0.0371723	0.0501188	±	0.0360043	0.0610141	±	0.0499289	0.028328	±	0.00754854	0.0174326	±	0.0164517	0.0108954	±	0.00754854	0.0457606	±	0.0130745	0.0217908	±	0.0210143	0.0348652	±	0.0322474	0.0457606	±	0.0235703	0.0261489	±	0.0130745	0.0174326	±	0.0136083	0.0261489	±	0.0397644	0.00871631	±	0.00377427	0.0261489	±
OTU5961	Acidobacteria	Acidobacteria_Gp7	Gp7	Gp7_unclassified	Gp7_unclassified	0.0196117	±	0.0172959	0.0152535	±	0.0136083	0.0152535	±	0.00998578	0.0174326	±	0.0164517	0.0261489	±	0.0299573	0.0305071	±	0.0164517	0.0152535	±	0.0136083	0.0152535	±	0.0164517	0.0414025	±	0.0272167	0.0479397	±	0.0377427	0.0217908	±	0.0164517	0.056656	±	0.0164517	0.0261489	±	0.0284951	0.0196117	±	0.0172959	0.0130745	±
OTU9048	Actinobacteria	Actinobacteria	Actinomycetales	Nocardioidaceae	Marmoricola	0.0675514	±	0.0490655	0.102417	±	0.0210143	0.0544769	±	0.022958	0.0915212	±	1.69967e-17	0.0544769	±	0.0720085	0.0392234	±	0.0235703	0.0196117	±	0.0113228	0.028328	±	0.00998578	0.0174326	±	0.00998578	0.0261489	±	0.0196117	0.0217908	±	0.0150971	0.00217908	±	0.00377427	0.0152535	±	0.0164517	0.0174326	±	0.0150971	0.0152535	±
OTU424	Proteobacteria	Deltaproteobacteria	Myxococcales	Nannocystaceae	Pseudenhygromyxa	0.0130745	±	0.0130745	0.0174326	±	0.00754854	0.0305071	±	0.00998578	0.028328	±	0.0164517	0.0414025	±	0.0199716	0.028328	±	0.00998578	0.0414025	±	0.0308937	0.0370443	±	0.0164517	0.0479397	±	0.044498	0.056656	±	0.0164517	0.0326861	±	0.0172959	0.0675514	±	0.00998578	0.0174326	±	0.0199716	0.0217908	±	0.00998578	0.0174326	±
OTU657	Chloroflexi	Anaerolineae	Anaerolineales	Anaerolineaceae	Anaerolineaceae_unclassified	0.0108954	±	0.00754854	0.00653723	±	0.00653723	0.0152535	±	0.00998578	0.0239698	±	0.00998578	0.0326861	±	0.0113228	0.0196117	±	0.00653723	0.0414025	±	0.00754854	0.0435815	±	0.0335465	0.0239698	±	0.00377427	0.0457606	±	0.0130745	0.0414025	±	0.0199716	0.0326861	±	0.0235703	0.0152535	±	0.0136083	0.0152535	±	0.00998578	0.0217908	±
OTU575	Chloroflexi	Anaerolineae	Anaerolineales	Anaerolineaceae	Ornatilinea	0.028328	±	0.0188714	0.0457606	±	0.0284951	0.0435815	±	0.0335465	0.0261489	±	0.00653723	0.0392234	±	0.0345918	0.0348652	±	0.0322474	0.0239698	±	0.0301942	0.028328	±	0.00377427	0.0348652	±	0.00377427	0.0588351	±	0.00653723	0.0326861	±	0.0284951	0.028328	±	0.0210143	0.0239698	±	0.0164517	0.0174326	±	0.0247496	0.0196117	±
OTU1056	Proteobacteria	Deltaproteobacteria	Myxococcales	Myxococcales_unclassified	Myxococcales_unclassified	0.0196117	±	0.0130745	0.0392234	±	0.0299573	0.0479397	±	0.0164517	0.0719095	±	0.0284951	0.0937003	±	0.134026	0.0174326	±	0.0247496	0.0152535	±	0.0210143	0.0196117	±	0.0172959	0.0196117	±	0.0172959	0.0217908	±	0.0272167	0.0130745	±	0.0113228	0.0261489	±	0.0172959	0.0196117	±	0.0172959	0.00217908	±	0.00377427	0.0435815	±
OTU440	Verrucomicrobia	Spartobacteria	Spartobacteria_unclassified	Spartobacteria_unclassified	Spartobacteria_unclassified	0.0217908	±	0.00377427	0.0239698	±	0.0199716	0.0239698	±	0.0164517	0.0174326	±	0.00998578	0.028328	±	0.0164517	0.0348652	±	0.0210143	0.0174326	±	0.0199716	0.0196117	±	0.0172959	0.0631932	±	0.0544333	0.0261489	±	0.00653723	0.00871631	±	0.00998578	0.0174326	±	0.0247496	0.0392234	±	0.0172959	0.0392234	±	0.00653723	0.0370443	±
OTU806	Proteobacteria	Proteobacteria_unclassified	Proteobacteria_unclassified	Proteobacteria_unclassified	Proteobacteria_unclassified	0.0305071	±	0.0136083	0.0326861	±	0.0235703	0.0479397	±	0.0136083	0.0305071	±	0.00377427	0.0326861	±	0.0345918	0.0392234	±	0.0226456	0.0326861	±	0.0130745	0.0239698	±	0.0308937	0.0174326	±	0.0150971	0.0544769	±	0.0272167	0.0261489	±	0.0196117	0.0239698	±	0.022958	0.028328	±	0.00377427	0.0348652	±	0.0199716	0.028328	±
OTU700	Verrucomicrobia	Verrucomicrobiae	Verrucomicrobiales	Verrucomicrobiaceae	Verrucomicrobiaceae_unclassified	0.0217908	±	0.00377427	0.0217908	±	0.00998578	0.0348652	±	0.0603883	0.0217908	±	0.00998578	0.0130745	±	0.00653723	0.028328	±	0.00377427	0.0174326	±	0.0136083	0.0130745	±	0.0113228	0.0261489	±	0.0196117	0.0326861	±	0.0226456	0.0239698	±	0.00998578	0.0108954	±	0.0188714	0.0152535	±	0.0136083	0.0414025	±	0.0399431	0.0239698	±
OTU883	Firmicutes	Clostridia	Clostridiales	Clostridiaceae_1	Clostridium_sensu_stricto	0.0217908	±	0.00754854	0.0392234	±	0.0130745	0.0305071	±	0.0247496	0.0239698	±	0.0247496	0.0501188	±	0.0199716	0.0239698	±	0.00377427	0.0217908	±	0.0199716	0.0435815	±	0.0329033	0.0239698	±	0.00998578	0.0392234	±	0.0392234	0.0130745	±	0.00653723	0.028328	±	0.0188714	0.0305071	±	0.0164517	0.0326861	±	0.0130745	0.0261489	±
OTU564	Acidobacteria	Acidobacteria_Gp11	Gp11	Gp11_unclassified	Gp11_unclassified	0.0457606	±	0.0113228	0.0196117	±	0.0113228	0.0435815	±	0.0264199	0.0305071	±	0.0164517	0.0174326	±	0.0188714	0.0239698	±	0.00998578	0.0217908	±	0.00377427	0.0261489	±	0.0113228	0.0174326	±	0.00377427	0.0588351	±	0.0284951	0.0305071	±	0.00998578	0.0544769	±	0.0188714	0.0130745	±	0.00653723	0.0326861	±	0.0397644	0.028328	±
OTU615	Proteobacteria	Deltaproteobacteria	Myxococcales	Polyangiaceae	Chondromyces	0.0326861	±	0.0284951	0.0174326	±	0.00754854	0.0108954	±	0.0136083	0.0217908	±	0.0164517	0.0414025	±	0.00377427	0.0130745	±	0.0113228	0.0326861	±	0.0284951	0.0152535	±	0.0150971	0.0392234	±	0.0196117	0.0501188	±	0.0322474	0.0719095	±	0.0299573	0.056656	±	0.022958	0.0239698	±	0.0136083	0.0239698	±	0.00754854	0.0174326	±
OTU431	Acidobacteria	Acidobacteria_Gp6	Gp6	Gp6_unclassified	Gp6_unclassified	0.0305071	±	0.00377427	0.00871631	±	0.00377427	0.0305071	±	0.0210143	0.0305071	±	0.0308937	0.0392234	±	0.0326861	0.0174326	±	0.00754854	0.0326861	±	0.0226456	0.0305071	±	0.0371723	0.0326861	±	0.0261489	0.0239698	±	0.00754854	0.0305071	±	0.029478	0.0130745	±	0.0130745	0.0370443	±	0.0199716	0.0457606	±	0.00653723	0.0196117	±
OTU538	Planctomycetes	Planctomycetia	Planctomycetales	Planctomycetaceae	Planctomycetaceae_unclassified	0.00653723	±	0.00653723	0.00217908	±	0.00377427	0.00653723	±	0.00653723	0.00435815	±	0.00377427	0.0174326	±	0.00754854	0.0261489	±	0.0130745	0.00871631	±	0.00998578	0.0152535	±	0.0136083	0.028328	±	0.022958	0.0414025	±	0.0164517	0.0261489	±	0.0235703	0.0479397	±	0.022958	0.0174326	±	0.0199716	0.0326861	±	0.00653723	0.0348652	±
OTU527	Planctomycetes	Planctomycetia	Planctomycetales	Planctomycetaceae	Gemmata	0.0239698	±	0.0264199	0.00653723	±	0.00653723	0.00871631	±	0.00377427	0.0174326	±	0.00998578	0.0370443	±	0.0360043	0.0261489	±	0.0235703	0.0239698	±	0.00754854	0.0414025	±	0.029478	0.0196117	±	0.00653723	0.0217908	±	0.00377427	0.0457606	±	0.0339684	0.056656	±	0.00377427	0.0196117	±	0.0130745	0.0196117	±	0.0113228	0.0326861	±
OTU347	Proteobacteria	Gammaproteobacteria	Xanthomonadales	Xanthomonadaceae	Arenimonas	0.0479397	±	0.0188714	0.0414025	±	0.0210143	0.0348652	±	0.0188714	0.0370443	±	0.0164517	0.0435815	±	0.022958	0.0370443	±	0.0164517	0.056656	±	0.0420285	0.0370443	±	0.0150971	0.0305071	±	0.0272167	0.0370443	±	0.0210143	0.0239698	±	0.0264199	0.0370443	±	0.0164517	0.0392234	±	0	0.0217908	±	0.0164517	0.0326861	±
OTU603	Firmicutes	Bacilli	Bacillales	Bacillaceae_1	Bacillus	0.0544769	±	0.0210143	0.0457606	±	8.49837e-18	0.056656	±	0.0272167	0.0457606	±	0.0397644	0.0370443	±	0.0199716	0.0174326	±	0.00754854	0.0152535	±	0.00754854	0.028328	±	0.0164517	0.0305071	±	0.022958	0.0370443	±	0.0199716	0.0392234	±	0.0284951	0.0457606	±	0.0130745	0.0108954	±	0.0136083	0.0108954	±	0.00754854	0.0261489	±
OTU660	Planctomycetes	Planctomycetia	Planctomycetales	Planctomycetaceae	Aquisphaera	0.00871631	±	0.00998578	0.0174326	±	0.00377427	0.028328	±	0.00754854	0.0326861	±	0.0235703	0.0326861	±	0.0226456	0.0501188	±	0.0272167	0.0196117	±	0.0172959	0.0348652	±	0.0188714	0.0457606	±	0.0113228	0.0239698	±	0.0247496	0.0414025	±	0.00377427	0.028328	±	0.0136083	0.0174326	±	0.00754854	0.0152535	±	0.0210143	0.0457606	±
OTU628	Actinobacteria	Actinobacteria	Actinomycetales	Micromonosporaceae	Micromonosporaceae_unclassified	0.00217908	±	0.00377427	0.00217908	±	0.00377427	0.00217908	±	0.00377427	0.00435815	±	0.00754854	0.0217908	±	0.0272167	0.00653723	±	1.0623e-18	0.00435815	±	0.00377427	0.00653723	±	0.00653723	0.0130745	±	0.00653723	0.0108954	±	0.00754854	0.0152535	±	0.0136083	0.0239698	±	0.0360043	0.0479397	±	0.0490655	0.0217908	±	0.00998578	0.0196117	±
OTU4135	Verrucomicrobia	Subdivision3	Subdivision3_unclassified	Subdivision3_unclassified	Subdivision3_unclassified	0.0261489	±	0.0226456	0.0239698	±	0.022958	0.028328	±	0.00377427	0.0588351	±	0.0392234	0.0414025	±	0.0329033	0.0479397	±	0.00998578	0.0108954	±	0.0136083	0.0108954	±	0.00377427	0.0305071	±	0.00998578	0.0522978	±	0.0130745	0.0261489	±	0.0113228	0.0326861	±	0.0284951	0.028328	±	0.0322474	0.0217908	±	0.0188714	0.0196117	±
OTU3346	Proteobacteria	Betaproteobacteria	Burkholderiales	Oxalobacteraceae	Herbaspirillum	0.00653723	±	0.00653723	0.0108954	±	0.0136083	0.00871631	±	0.00998578	0.00653723	±	1.0623e-18	0.0740886	±	0.0667737	0.0588351	±	0.0522978	0.0239698	±	0.0136083	0.0239698	±	0.00998578	0.0762677	±	0.0607411	0.0326861	±	0	0.0305071	±	0.00377427	0.0196117	±	0.0235703	0.0348652	±	0.0136083	0.0196117	±	0.0226456	0.0217908	±
OTU7594	Actinobacteria	Actinobacteria	Actinomycetales	Nocardioidaceae	Nocardioides	0.00435815	±	0.00377427	0.00871631	±	0.00998578	0.00653723	±	0.0113228	0.0174326	±	0.0150971	0.0152535	±	0.00998578	0.0174326	±	0.00377427	0.0108954	±	0.00998578	0.028328	±	0.0210143	0.0108954	±	0.00998578	0.028328	±	0.0322474	0.0130745	±	0.0113228	0.0370443	±	0.0199716	0.0653723	±	0.0569902	0.0501188	±	0.0360043	0.0130745	±
OTU460	Proteobacteria	Alphaproteobacteria	Sphingomonadales	Sphingomonadaceae	Sandaracinobacter	0	±	0	0	±	0	0	±	0	0.00217908	±	0.00377427	0.0675514	±	0.00754854	0.0370443	±	0.00998578	0.0435815	±	0.00998578	0.0305071	±	0.0264199	0.0370443	±	0.0164517	0.0261489	±	0.0345918	0.0326861	±	0.0172959	0.0174326	±	0.00998578	0.0217908	±	0.00754854	0.0261489	±	0.0130745	0.113312	±
OTU8893	Actinobacteria	Actinobacteria	Actinomycetales	Nocardioidaceae	Nocardioides	0.0174326	±	0.00754854	0.0261489	±	0.0196117	0.0196117	±	0.00653723	0.0261489	±	0.0113228	0.0588351	±	0.0235703	0.0261489	±	0.0113228	0.0544769	±	0.0329033	0.0588351	±	0.0284951	0.0174326	±	0.0164517	0.0348652	±	0.0335465	0.0326861	±	0.00653723	0.0414025	±	0.0383047	0.0370443	±	0.00377427	0.0348652	±	0.022958	0.0457606	±
OTU12690	Proteobacteria	Alphaproteobacteria	Rhizobiales	Rhizobiales_unclassified	Rhizobiales_unclassified	0.0196117	±	0.00653723	0.0152535	±	0.0136083	0.0261489	±	4.24919e-18	0.0174326	±	0.0188714	0.0261489	±	0.0172959	0.0174326	±	0.00998578	0.0305071	±	0.00998578	0.0392234	±	0.00653723	0.0370443	±	0.0371723	0.0152535	±	0.0210143	0.0392234	±	0.00653723	0.0479397	±	0.0164517	0.0174326	±	0.00998578	0.028328	±	0.0136083	0.0152535	±
OTU351	Planctomycetes	Planctomycetia	Planctomycetales	Planctomycetaceae	Pirellula	0.0217908	±	0.0164517	0.00871631	±	0.00377427	0.0348652	±	0.00377427	0.0348652	±	0.00998578	0.0261489	±	0.00653723	0.028328	±	0.0210143	0.0174326	±	0.00998578	0.028328	±	0.0136083	0.0239698	±	0.0150971	0.0370443	±	0.0136083	0.0479397	±	0.0360043	0.0544769	±	0.00754854	0.0239698	±	0.00998578	0.00435815	±	0.00754854	0.0392234	±
OTU336	Bacteroidetes	Sphingobacteriia	Sphingobacteriales	Chitinophagaceae	Terrimonas	0.0370443	±	0.00998578	0.0326861	±	0.0113228	0.0305071	±	0.00377427	0.0414025	±	0.00998578	0.00653723	±	0.00653723	0.0348652	±	0.00377427	0.0217908	±	0.0322474	0.00871631	±	0.00377427	0.0152535	±	0.00377427	0.0305071	±	0.0210143	0.0414025	±	0.0247496	0.0130745	±	0.0113228	0.00653723	±	0.00653723	0.0239698	±	0.0210143	0.0217908	±
OTU6911	Proteobacteria	Betaproteobacteria	Burkholderiales	Burkholderiales_unclassified	Burkholderiales_unclassified	0.0108954	±	0.00998578	0.00871631	±	0.00754854	0.0152535	±	0.0164517	0.0152535	±	0.00998578	0.00217908	±	0.00377427	0.0108954	±	0.0136083	0.0130745	±	0.0113228	0.00653723	±	0.0113228	0.028328	±	0.00377427	0.0501188	±	0.0136083	0.0522978	±	0.0452913	0.0348652	±	0.0383047	0.028328	±	0.0272167	0.0457606	±	0.049355	0.0610141	±
OTU743	Bacteria_unclassified	Bacteria_unclassified	Bacteria_unclassified	Bacteria_unclassified	Bacteria_unclassified	0.028328	±	0.0199716	0.0196117	±	0.0172959	0.028328	±	0.00754854	0.0261489	±	0.0130745	0.0239698	±	0.0264199	0.0239698	±	0.0308937	0.0217908	±	0.0164517	0.0261489	±	4.24919e-18	0.0392234	±	0.0172959	0.0522978	±	0.0113228	0.0501188	±	0.0210143	0.0348652	±	0.029478	0.0392234	±	0.0235703	0.0414025	±	0.00998578	0.0217908	±
OTU339	Planctomycetes	Planctomycetia	Planctomycetales	Planctomycetaceae	Pirellula	0.0196117	±	0.00653723	0.0305071	±	0.0272167	0.0239698	±	0.0210143	0.0261489	±	0.0299573	0.0239698	±	0.0150971	0.0174326	±	0.00754854	0.0196117	±	0.0172959	0.0544769	±	0.00998578	0.0370443	±	0.0136083	0.0196117	±	0.0226456	0.028328	±	0.0150971	0.028328	±	0.022958	0.0174326	±	0.0136083	0.0305071	±	0.029478	0.0152535	±
OTU7801	Proteobacteria	Alphaproteobacteria	Rhizobiales	Rhizobiales_unclassified	Rhizobiales_unclassified	0.0348652	±	0.0210143	0.0435815	±	0.00998578	0.0370443	±	0.0264199	0.0370443	±	0.00998578	0.0239698	±	0.0247496	0.0348652	±	0.00998578	0.028328	±	0.0136083	0.028328	±	0.0136083	0.0239698	±	0.0164517	0.0370443	±	0.0308937	0.0152535	±	0.00754854	0.0261489	±	0.0130745	0.00871631	±	0.00998578	0.0217908	±	0.0322474	0.0239698	±
OTU378	Bacteroidetes	Sphingobacteriia	Sphingobacteriales	Chitinophagaceae	Flavisolibacter	0.0239698	±	0.0247496	0.0261489	±	0.00653723	0.0174326	±	0.0150971	0.0174326	±	0.00377427	0.0479397	±	0.0264199	0.0174326	±	0.00998578	0.0217908	±	0.0136083	0.0392234	±	0.0113228	0.0370443	±	0.022958	0.0239698	±	0.0247496	0.0239698	±	0.0247496	0.0326861	±	0.0113228	0.0479397	±	0.0164517	0.0479397	±	0.0377427	0.0392234	±
OTU784	Actinobacteria	Actinobacteria	Acidimicrobiales	Acidimicrobineae_incertae_sedis	Aciditerrimonas	0.0261489	±	0.00653723	0.0435815	±	0.0136083	0.0414025	±	0.0383047	0.0370443	±	0.0264199	0.0326861	±	0.0284951	0.0326861	±	0.0113228	0.0326861	±	0.00653723	0.0392234	±	0.0196117	0.0196117	±	0.00653723	0.0261489	±	0.0235703	0.028328	±	0.029478	0.0108954	±	0.00377427	0.0108954	±	0.0188714	0.0305071	±	0.0210143	0.0501188	±
OTU800	Proteobacteria	Gammaproteobacteria	Pseudomonadales	Pseudomonadaceae	Cellvibrio	0.00435815	±	0.00377427	0.0217908	±	0.0322474	0.0108954	±	0.0188714	0.0108954	±	0.00377427	0.0457606	±	0.0172959	0.0653723	±	0.0569902	0.0828049	±	0.0532426	0.0326861	±	0.00653723	0.0501188	±	0.0329033	0.028328	±	0.0247496	0.0414025	±	0.0272167	0.0392234	±	0.0172959	0.0261489	±	0.0226456	0.0261489	±	0.00653723	0.0392234	±
OTU699	Proteobacteria	Gammaproteobacteria	Methylococcales	Methylococcaceae	Methylobacter	0.056656	±	0.046379	0.0305071	±	0.0301942	0.0305071	±	0.0308937	0.00435815	±	0.00754854	0.0152535	±	0.00377427	0.0414025	±	0.00754854	0.0217908	±	0.0199716	0.00653723	±	0.0113228	0.00871631	±	0.0150971	0.139461	±	0.192858	0.0239698	±	0.041517	0.0108954	±	0.00998578	0.0174326	±	0.0199716	0.0130745	±	0.0130745	0.0217908	±
OTU643	Actinobacteria	Actinobacteria	Solirubrobacterales	Conexibacteraceae	Conexibacter	0.0261489	±	0.0172959	0.0435815	±	0.00998578	0.0392234	±	0.0235703	0.0501188	±	0.0150971	0.0239698	±	0.00754854	0.00217908	±	0.00377427	0.0174326	±	0.0136083	0.0174326	±	0.00998578	0.0501188	±	0.0272167	0.00653723	±	0.00653723	0.0610141	±	0.0335465	0.028328	±	0.0272167	0.0326861	±	0.0172959	0.0130745	±	0.0130745	0.0217908	±
OTU925	Acidobacteria	Acidobacteria_Gp6	Gp6	Gp6_unclassified	Gp6_unclassified	0.028328	±	0.0199716	0.0392234	±	0.00653723	0.0370443	±	0.00998578	0.0370443	±	0.0210143	0.0239698	±	0.00998578	0.0370443	±	0.0308937	0.0305071	±	0.0199716	0.028328	±	0.0136083	0.0261489	±	0.0172959	0.0457606	±	0.0326861	0.0152535	±	0.00377427	0.0305071	±	0.00754854	0.0108954	±	0.00377427	0.0261489	±	0.0235703	0.0130745	±
OTU733	Acidobacteria	Acidobacteria_Gp17	Gp17	Gp17_unclassified	Gp17_unclassified	0.0501188	±	0.0264199	0.0544769	±	0.0164517	0.0588351	±	0.0113228	0.0544769	±	0.0264199	0.00653723	±	0.00653723	0.028328	±	0.0264199	0.00435815	±	0.00754854	0.0305071	±	0.0188714	0.0152535	±	0.0164517	0.0261489	±	0.00653723	0.0326861	±	0.0235703	0.0348652	±	0.0150971	0.00871631	±	0.00754854	0.0196117	±	0.0339684	0.0108954	±
OTU714	Actinobacteria	Actinobacteria	Acidimicrobiales	Iamiaceae	Iamiaceae_unclassified	0.028328	±	0.029478	0.0261489	±	0.00653723	0.0348652	±	0.0272167	0.0108954	±	0.00998578	0.0348652	±	0.0188714	0.0152535	±	0.0136083	0.0544769	±	0.029478	0.0392234	±	0.0284951	0.0370443	±	0.0210143	0.0370443	±	0.041517	0.0196117	±	0.0130745	0.0261489	±	0.0261489	0.0392234	±	0.0113228	0.0217908	±	0.0272167	0.0217908	±
OTU517	Chloroflexi	Anaerolineae	Anaerolineales	Anaerolineaceae	Anaerolineaceae_unclassified	0.0435815	±	0.0164517	0.0130745	±	2.12459e-18	0.028328	±	0.0136083	0.0217908	±	0.0164517	0.0326861	±	0.00653723	0.0348652	±	0.0210143	0.0174326	±	0.0164517	0.0217908	±	0.00998578	0.0239698	±	0.0301942	0.0544769	±	0.0210143	0.0239698	±	0.0247496	0.028328	±	0.0210143	0.0239698	±	0.0199716	0.028328	±	0.00998578	0.0108954	±
OTU9892	Firmicutes	Clostridia	Clostridiales	Clostridiaceae_1	Clostridium_sensu_stricto	0.0152535	±	0.00998578	0.0305071	±	0.0264199	0.0348652	±	0.00754854	0.0348652	±	0.0322474	0.0326861	±	0.0172959	0.0174326	±	0.00754854	0.0261489	±	0.00653723	0.028328	±	0.00998578	0.056656	±	0.0360043	0.0414025	±	0.00377427	0.0217908	±	0.00377427	0.0305071	±	0.0360043	0.0479397	±	0.0210143	0.0239698	±	0.00754854	0.0239698	±
OTU597	Firmicutes	Bacilli	Bacillales	Bacillaceae_2	Ornithinibacillus	0.0152535	±	0.00754854	0.0392234	±	0.0428675	0.0217908	±	0.00754854	0.056656	±	0.043527	0.0435815	±	0.0264199	0.0501188	±	0.0247496	0.0392234	±	0.0299573	0.0348652	±	0.00754854	0.0326861	±	0.0196117	0.0457606	±	0.0113228	0.0152535	±	0.00377427	0.0174326	±	0.00377427	0.0174326	±	0.00754854	0.0174326	±	0.0150971	0.0108954	±
OTU4641	Proteobacteria	Betaproteobacteria	Burkholderiales	Comamonadaceae	Comamonadaceae_unclassified	0.0152535	±	0.0164517	0.0305071	±	0.0136083	0.0348652	±	0.00998578	0.0261489	±	0.00653723	0.0196117	±	0.0113228	0.0217908	±	0.00998578	0.0196117	±	0.00653723	0.0348652	±	0.00754854	0.0108954	±	0.00754854	0.0610141	±	0.0399431	0.0239698	±	0.0136083	0.0130745	±	0.00653723	0.0196117	±	0.0196117	0.0239698	±	0.0199716	0.0130745	±
OTU1075	Proteobacteria	Alphaproteobacteria	Sphingomonadales	Sphingomonadaceae	Sphingosinicella	0.0174326	±	0.00754854	0.0261489	±	0.0196117	0.0239698	±	0.00377427	0.0174326	±	0.00998578	0.0239698	±	0.022958	0.028328	±	0.0164517	0.028328	±	0.0164517	0.0217908	±	0.00754854	0.0348652	±	0.00377427	0.0261489	±	0.0172959	0.028328	±	0.0210143	0.0370443	±	0.0308937	0.028328	±	0.00998578	0.028328	±	0.0188714	0.0479397	±
OTU290	Candidatus_Saccharibacteria	Candidatus_Saccharibacteria_unclassified	Candidatus_Saccharibacteria_unclassified	Candidatus_Saccharibacteria_unclassified	Candidatus_Saccharibacteria_unclassified	0	±	0	0	±	0	0.00217908	±	0.00377427	0	±	0	0.0174326	±	0.0136083	0.0196117	±	0.0130745	0.0196117	±	0.0172959	0.0435815	±	0.022958	0.0479397	±	0.0264199	0.0522978	±	0.049355	0.0501188	±	0.0585924	0.0217908	±	0.0136083	0.0370443	±	0.0247496	0.0457606	±	0.0630428	0.0697304	±
OTU286	Bacteria_unclassified	Bacteria_unclassified	Bacteria_unclassified	Bacteria_unclassified	Bacteria_unclassified	0	±	0	0	±	0	0.00217908	±	0.00377427	0	±	0	0.0152535	±	0.0264199	0.00653723	±	0.00653723	0.0457606	±	0.0299573	0.00435815	±	0.00754854	0.0915212	±	0.0792597	0.0915212	±	0.109973	0.104596	±	0.0392234	0.0108954	±	0.0136083	0.0130745	±	0.0172959	0.0370443	±	0.0532426	0.0697304	±
OTU466	Proteobacteria	Alphaproteobacteria	Rhizobiales	Rhizobiales_unclassified	Rhizobiales_unclassified	0.00653723	±	0.0113228	0.0108954	±	0.0136083	0.0196117	±	0.0226456	0.0196117	±	0.0113228	0.0261489	±	0.0130745	0.0392234	±	0.0130745	0.0501188	±	0.029478	0.0435815	±	0.029478	0.0501188	±	0.0394045	0.0348652	±	0.0247496	0.0501188	±	0.0164517	0.0196117	±	0.00653723	0.0174326	±	0.0136083	0.0653723	±	0.0803308	0.0719095	±
OTU455	Acidobacteria	Acidobacteria_Gp7	Gp7	Gp7_unclassified	Gp7_unclassified	0.0305071	±	0.0371723	0.0326861	±	0.0130745	0.0326861	±	0.0172959	0.0217908	±	0.0164517	0.028328	±	0.0272167	0.0370443	±	0.0210143	0.0501188	±	0.0264199	0.028328	±	0.0322474	0.0610141	±	0.0136083	0.0305071	±	0.0210143	0.00217908	±	0.00377427	0.0392234	±	0.0284951	0.028328	±	0.0210143	0.0239698	±	0.00998578	0.0174326	±
OTU926	Actinobacteria	Actinobacteria	Solirubrobacterales	Solirubrobacteraceae	Solirubrobacter	0.0261489	±	0.0284951	0.0261489	±	0.00653723	0.0544769	±	0.0164517	0.0370443	±	0.0150971	0.0239698	±	0.00377427	0.0544769	±	0.0199716	0.0239698	±	0.00377427	0.0414025	±	0.0136083	0.0261489	±	0.00653723	0.0239698	±	0.0360043	0.0130745	±	0.00653723	0.0326861	±	0.0130745	0.0217908	±	0.0164517	0.0305071	±	0.0136083	0.028328	±
OTU4058	Proteobacteria	Betaproteobacteria	Burkholderiales	Burkholderiales_unclassified	Burkholderiales_unclassified	0.0174326	±	0.0164517	0.0217908	±	0.0136083	0.0239698	±	0.00754854	0.0326861	±	0.0113228	0.0305071	±	0.0247496	0.028328	±	0.00754854	0.0501188	±	0.0499289	0.0239698	±	0.0136083	0.0435815	±	0.0264199	0.0196117	±	0.0226456	0.0305071	±	0.0150971	0.0217908	±	0.00754854	0.0217908	±	0.0164517	0.0152535	±	0.00754854	0.0152535	±
OTU354	Candidatus_Saccharibacteria	Candidatus_Saccharibacteria_unclassified	Candidatus_Saccharibacteria_unclassified	Candidatus_Saccharibacteria_unclassified	Candidatus_Saccharibacteria_unclassified	0.00217908	±	0.00377427	0.0196117	±	0.0196117	0.0152535	±	0.0136083	0.00435815	±	0.00754854	0.0108954	±	0.0136083	0.0326861	±	0.0261489	0.0108954	±	0.0136083	0.0762677	±	0.0548245	0.148177	±	0.11479	0.0762677	±	0.0528398	0.0370443	±	0.0301942	0.0348652	±	0.0329033	0.0174326	±	0.00377427	0.0152535	±	0.0164517	0.0152535	±
OTU381	Bacteroidetes	Sphingobacteriia	Sphingobacteriales	Chitinophagaceae	Chitinophagaceae_unclassified	0.0392234	±	0.00653723	0.0370443	±	0.0136083	0.0414025	±	0.00998578	0.0479397	±	0.0360043	0.0457606	±	0.0363978	0.0457606	±	0.0113228	0.0435815	±	0.0199716	0.0305071	±	0.0188714	0.0130745	±	0.0113228	0.0239698	±	0.00377427	0.0239698	±	0.0164517	0.00435815	±	0.00377427	0.0174326	±	0.00377427	0.0196117	±	0.0235703	0.00871631	±
OTU1446	Proteobacteria	Alphaproteobacteria	Rhizobiales	Hyphomicrobiaceae	Devosia	0.0522978	±	0.0299573	0.0261489	±	0.00653723	0.0239698	±	0.0150971	0.0174326	±	0.0247496	0.0348652	±	0.00377427	0.0305071	±	0.0210143	0.0261489	±	4.24919e-18	0.0130745	±	0.0130745	0.0196117	±	0.0196117	0.00217908	±	0.00377427	0.0174326	±	0.0164517	0.0152535	±	0.00998578	0.0196117	±	0.0196117	0.0457606	±	0.0130745	0.0196117	±
OTU610	Proteobacteria	Betaproteobacteria	Burkholderiales	Burkholderiales_unclassified	Burkholderiales_unclassified	0.0239698	±	0.00377427	0.0305071	±	0.0210143	0.0174326	±	0.0199716	0.0174326	±	0.00754854	0.0457606	±	0.0299573	0.0392234	±	0.0172959	0.0217908	±	0.0210143	0.0370443	±	0.00754854	0.0522978	±	0.0172959	0.0479397	±	0.0360043	0.0348652	±	0.00998578	0.0196117	±	0.0284951	0.0217908	±	0.0136083	0.0130745	±	0.00653723	0.0174326	±
OTU1290	Acidobacteria	Acidobacteria_Gp6	Gp6	Gp6_unclassified	Gp6_unclassified	0.0152535	±	0.00754854	0.0305071	±	0.0272167	0.0392234	±	0.0113228	0.0348652	±	0.00754854	0.0326861	±	0.0172959	0.0348652	±	0.0199716	0.028328	±	0.00377427	0.0196117	±	0.0113228	0.0305071	±	0.00377427	0.0196117	±	0.0130745	0.0457606	±	0.0172959	0.028328	±	0.0150971	0.0261489	±	0.0130745	0.028328	±	0.00754854	0.0305071	±
OTU1795	Firmicutes	Bacilli	Bacillales	Paenibacillaceae_1	Paenibacillus	0.0174326	±	0.00754854	0.0174326	±	0.0199716	0.0130745	±	0.0130745	0.0196117	±	0.0196117	0.0174326	±	0.0164517	0.00871631	±	0.0150971	0.0196117	±	0.0196117	0.00653723	±	1.0623e-18	0.0130745	±	2.12459e-18	0.0196117	±	0.0130745	0.0261489	±	0.0172959	0.0130745	±	0.00653723	0.0392234	±	0.0397644	0.0196117	±	0.0172959	0.0108954	±
OTU537	Proteobacteria	Deltaproteobacteria	Myxococcales	Myxococcales_unclassified	Myxococcales_unclassified	0.00435815	±	0.00754854	0.00217908	±	0.00377427	0.00435815	±	0.00377427	0	±	0	0.0631932	±	0.0188714	0.0457606	±	0.040825	0.0435815	±	0.0136083	0.0457606	±	0.0299573	0.0457606	±	0.0457606	0.0261489	±	0.0261489	0.056656	±	0.041517	0.0196117	±	0.0172959	0.0196117	±	0.00653723	0.0326861	±	0.0172959	0.0937003	±
OTU359	Bacteria_unclassified	Bacteria_unclassified	Bacteria_unclassified	Bacteria_unclassified	Bacteria_unclassified	0.028328	±	0.00998578	0.0479397	±	0.0199716	0.0544769	±	0.0210143	0.0435815	±	0.00998578	0.056656	±	0.0164517	0.0261489	±	0.00653723	0.0348652	±	0.0136083	0.056656	±	0.00754854	0.0152535	±	0.00754854	0.0152535	±	0.0150971	0.0370443	±	0.0264199	0.0174326	±	0.0164517	0.028328	±	0.0136083	0.0108954	±	0.0136083	0.0370443	±
OTU1066	Acidobacteria	Acidobacteria_Gp16	Gp16	Gp16_unclassified	Gp16_unclassified	0.0261489	±	0.0226456	0.0305071	±	0.0329033	0.0501188	±	0.0247496	0.0305071	±	0.0247496	0.0348652	±	0.00754854	0.0239698	±	0.0360043	0.0261489	±	0.00653723	0.0239698	±	0.00377427	0.028328	±	0.0264199	0.0348652	±	0.00754854	0.0392234	±	0	0.0414025	±	0.0164517	0.0174326	±	0.00377427	0.0348652	±	0.0199716	0.0305071	±
OTU468	Gemmatimonadetes	Gemmatimonadetes	Gemmatimonadales	Gemmatimonadaceae	Gemmatimonas	0.00435815	±	0.00754854	0.00653723	±	0.00653723	0.0174326	±	0.0188714	0.0108954	±	0.00998578	0.0217908	±	0.0136083	0.0174326	±	0.0199716	0.0305071	±	0.029478	0.0305071	±	0.00998578	0.0435815	±	0.0199716	0.0414025	±	0.0150971	0.0871631	±	0.0199716	0.0370443	±	0.0272167	0.0326861	±	0.00653723	0.0305071	±	0.0136083	0.0217908	±
OTU495	Proteobacteria	Deltaproteobacteria	Deltaproteobacteria_unclassified	Deltaproteobacteria_unclassified	Deltaproteobacteria_unclassified	0.00435815	±	0.00754854	0.0239698	±	0.0164517	0.0217908	±	0.00998578	0.0196117	±	0.0113228	0.0305071	±	0.022958	0.0261489	±	0.00653723	0.0108954	±	0.0136083	0.0108954	±	0.00998578	0.0370443	±	0.0308937	0.0457606	±	0.0339684	0.0348652	±	0.0329033	0.00871631	±	0.00754854	0.0217908	±	0.0164517	0.028328	±	0.00377427	0.0414025	±
OTU565	Proteobacteria	Deltaproteobacteria	Myxococcales	Polyangiaceae	Polyangium	0.0261489	±	0.0113228	0.0108954	±	0.0136083	0.0174326	±	0.0136083	0.0392234	±	0.0284951	0.0130745	±	0.0130745	0.0174326	±	0.00754854	0.028328	±	0.0164517	0.0196117	±	0.00653723	0.028328	±	0.00377427	0.0544769	±	0.0667737	0.0196117	±	0.0130745	0.0130745	±	0.0113228	0.00871631	±	0.00377427	0.0261489	±	0.0261489	0.0196117	±
OTU513	Proteobacteria	Deltaproteobacteria	Myxococcales	Nannocystaceae	Nannocystis	0.0174326	±	0.00377427	0.028328	±	0.029478	0.0239698	±	0.00998578	0.0217908	±	0.0150971	0.0196117	±	0.0235703	0.0174326	±	0.0136083	0.00653723	±	0.00653723	0.0196117	±	0.0196117	0.0239698	±	0.0199716	0.0501188	±	0.0308937	0.0479397	±	0.0247496	0.0392234	±	0.0235703	0.0174326	±	0.00377427	0.0152535	±	0.00754854	0.0217908	±
OTU556	Proteobacteria	Alphaproteobacteria	Rhizobiales	Bradyrhizobiaceae	Bradyrhizobiaceae_unclassified	0	±	0	0	±	0	0	±	0	0	±	0	0	±	0	0	±	0	0	±	0	0	±	0	0	±	0	0	±	0	0	±	0	0	±	0	0	±	0	0	±	0	0	±
OTU654	Chloroflexi	Anaerolineae	Anaerolineales	Anaerolineaceae	Anaerolineaceae_unclassified	0.028328	±	0.0136083	0.0152535	±	0.00754854	0.028328	±	0.022958	0.0348652	±	0.00377427	0.0370443	±	0.0164517	0.0392234	±	0.0235703	0.0196117	±	0.0130745	0.028328	±	0.0164517	0.0501188	±	0.022958	0.0370443	±	0.00998578	0.00653723	±	0.00653723	0.0457606	±	0.0452913	0.0217908	±	0.00998578	0.0348652	±	0.0247496	0.00217908	±
OTU525	Planctomycetes	Planctomycetia	Planctomycetales	Planctomycetaceae	Planctomycetaceae_unclassified	0.0217908	±	0.00754854	0.0435815	±	0.022958	0.0305071	±	0.00998578	0.0348652	±	0.0136083	0.0196117	±	0.0113228	0.0152535	±	0.0164517	0.0305071	±	0.0150971	0.0196117	±	0.0130745	0.0501188	±	0.0420285	0.0392234	±	0.0172959	0.0326861	±	0.0130745	0.056656	±	0.0136083	0.0196117	±	0.0172959	0.0348652	±	0.029478	0.00871631	±
OTU465	Bacteria_unclassified	Bacteria_unclassified	Bacteria_unclassified	Bacteria_unclassified	Bacteria_unclassified	0.0261489	±	0.00653723	0.0392234	±	0.00653723	0.0239698	±	0.00998578	0.056656	±	0.0481867	0.0392234	±	0.0130745	0.0152535	±	0.0164517	0.0348652	±	0.00998578	0.0152535	±	0.00998578	0.0544769	±	0.0164517	0.0196117	±	0.0284951	0.0326861	±	0.0339684	0.0348652	±	0.0199716	0.0108954	±	0.00377427	0.0108954	±	0.00754854	0.0348652	±
OTU10252	Proteobacteria	Alphaproteobacteria	Rhizobiales	Rhizobiales_unclassified	Rhizobiales_unclassified	0.0392234	±	0.0172959	0.028328	±	0.00998578	0.0392234	±	0.0226456	0.0479397	±	0.00998578	0.0261489	±	0.0235703	0.0239698	±	0.00998578	0.00653723	±	0.0113228	0.0305071	±	0.00377427	0.0196117	±	0.00653723	0.0174326	±	0.0150971	0.0174326	±	0.0199716	0.0217908	±	0.0199716	0.0217908	±	0.00754854	0.0217908	±	0.00754854	0.0174326	±
OTU484	Proteobacteria	Gammaproteobacteria	Xanthomonadales	Xanthomonadaceae	Lysobacter	0.0326861	±	0.00653723	0.0414025	±	0.0399431	0.0217908	±	0.0164517	0.0501188	±	0.0371723	0.0501188	±	0.0164517	0.0392234	±	0.0172959	0.0457606	±	0.0428675	0.0435815	±	0.0308937	0.0174326	±	0.0164517	0.0174326	±	0.00377427	0.0392234	±	0.0428675	0.0196117	±	0.0130745	0.0305071	±	0.00754854	0.0261489	±	0.0130745	0.0108954	±
OTU604	Gemmatimonadetes	Gemmatimonadetes	Gemmatimonadales	Gemmatimonadaceae	Gemmatimonas	0.0217908	±	0.00377427	0.0261489	±	0.0113228	0.0108954	±	0.0188714	0.0196117	±	0.00653723	0.0305071	±	0.041517	0.028328	±	0.0322474	0.0348652	±	0.00377427	0.0174326	±	0.0136083	0.0174326	±	0.0150971	0.0719095	±	0.0345918	0.084984	±	0.0792597	0.0435815	±	0.0247496	0.0239698	±	0.0164517	0.0152535	±	0.0150971	0.0479397	±
OTU1696	Firmicutes	Clostridia	Clostridiales	Lachnospiraceae	Clostridium_XlVa	0.0239698	±	0.00754854	0.0588351	±	0.0299573	0.0305071	±	0.00998578	0.0392234	±	0.0130745	0.0392234	±	0.0299573	0.0370443	±	0.0247496	0.0326861	±	0.0226456	0.0326861	±	0.0130745	0.028328	±	0.0164517	0.028328	±	0.0136083	0.0326861	±	0.0235703	0.0174326	±	0.0136083	0.0196117	±	0.0172959	0.0217908	±	0.0264199	0.00871631	±
OTU719	Actinobacteria	Actinobacteria	Actinomycetales	Micromonosporaceae	Rhizocola	0.0261489	±	0.00653723	0.0305071	±	0.0308937	0.0392234	±	0.0452913	0.0435815	±	0.0264199	0.00871631	±	0.00998578	0.0326861	±	0.0235703	0.0305071	±	0.0264199	0.0174326	±	0.00754854	0	±	0	0.0370443	±	0.0585924	0.0196117	±	0.0130745	0.0501188	±	0.0544333	0.00871631	±	0.00377427	0.0305071	±	0.00998578	0.00435815	±
OTU372	Firmicutes	Firmicutes_unclassified	Firmicutes_unclassified	Firmicutes_unclassified	Firmicutes_unclassified	0.0196117	±	0.0284951	0.00653723	±	0.00653723	0.0217908	±	0.00754854	0.028328	±	0.0136083	0.0588351	±	0.0558541	0.0305071	±	0.0150971	0.056656	±	0.0136083	0.0762677	±	0.0150971	0.0239698	±	0.0301942	0.028328	±	0.0136083	0.0370443	±	0.00377427	0.0326861	±	0.0113228	0.0217908	±	0.0272167	0.00871631	±	0.0150971	0.0217908	±
OTU2803	Actinobacteria	Actinobacteria	Actinomycetales	Mycobacteriaceae	Mycobacterium	0.0370443	±	0.0199716	0.00871631	±	0.00754854	0.028328	±	0.00377427	0.0479397	±	0.00998578	0.0261489	±	0.0345918	0.0261489	±	0.0172959	0.028328	±	0.0150971	0.0392234	±	0.0363978	0.0239698	±	0.0164517	0.0174326	±	0.00754854	0.0217908	±	0.00754854	0.0152535	±	0.00377427	0.0152535	±	0.00998578	0.0108954	±	0.00377427	0.0435815	±
OTU848	Verrucomicrobia	Spartobacteria	Spartobacteria_unclassified	Spartobacteria_unclassified	Spartobacteria_unclassified	0.0305071	±	0.041517	0.0544769	±	0.0301942	0.0305071	±	0.0199716	0.0435815	±	0.00998578	0.0305071	±	0.00998578	0.0239698	±	0.0136083	0.0239698	±	0.0150971	0.0261489	±	0.0113228	0.0261489	±	0.0113228	0.0326861	±	0.00653723	0.0196117	±	0.00653723	0.028328	±	0.00377427	0.0261489	±	0.0172959	0.0217908	±	0.00998578	0.028328	±
OTU504	Chloroflexi	Chloroflexi_unclassified	Chloroflexi_unclassified	Chloroflexi_unclassified	Chloroflexi_unclassified	0.0348652	±	0.0264199	0.0196117	±	0.00653723	0.0174326	±	0.0164517	0.0174326	±	0.0247496	0.0261489	±	0.0235703	0.0348652	±	0.0210143	0.0196117	±	0.0284951	0.0414025	±	0.0136083	0.0305071	±	0.0264199	0.0239698	±	0.0136083	0.0152535	±	0.0150971	0.028328	±	0.0322474	0.0174326	±	0.00754854	0.00653723	±	0.0113228	0.0196117	±
OTU563	Actinobacteria	Actinobacteria	Actinomycetales	Nocardioidaceae	Nocardioides	0.0326861	±	0	0.0392234	±	0.0235703	0.0544769	±	0.00998578	0.0239698	±	0.0199716	0.028328	±	0.0164517	0.0305071	±	0.0164517	0.0326861	±	0.0172959	0.0130745	±	0.00653723	0.0261489	±	0.00653723	0.0152535	±	0.00998578	0.0261489	±	0.0113228	0.0174326	±	0.0164517	0.0305071	±	0.022958	0.0174326	±	0.0136083	0.0305071	±
OTU739	Bacteria_unclassified	Bacteria_unclassified	Bacteria_unclassified	Bacteria_unclassified	Bacteria_unclassified	0.00871631	±	0.0150971	0.0130745	±	0.0172959	0.0152535	±	0.00998578	0.0108954	±	0.00377427	0.0479397	±	0.0507776	0.0414025	±	0.0264199	0.0326861	±	0.0339684	0.0370443	±	0.00998578	0.0435815	±	0.0199716	0.028328	±	0.0210143	0.0414025	±	0.0210143	0.0392234	±	0.0196117	0.0370443	±	0.0150971	0.00653723	±	0.00653723	0.028328	±
OTU540	Proteobacteria	Alphaproteobacteria	Caulobacterales	Caulobacteraceae	Brevundimonas	0.0392234	±	0.0172959	0.056656	±	0.0264199	0.0239698	±	0.0188714	0.0392234	±	0.0172959	0.0457606	±	0.0397644	0.0239698	±	0.0308937	0.0435815	±	0.00377427	0.0261489	±	0.0113228	0.0174326	±	0.0188714	0.0152535	±	0.0150971	0.00653723	±	1.0623e-18	0.0152535	±	0.00998578	0.0479397	±	0.029478	0.0130745	±	0.0172959	0.0239698	±
OTU487	Proteobacteria	Alphaproteobacteria	Rhodobacterales	Rhodobacteraceae	Gemmobacter	0.0588351	±	0.040825	0.0108954	±	0.00998578	0.0108954	±	0.0136083	0.0174326	±	0.0199716	0.028328	±	0.0210143	0.0261489	±	0.0113228	0.0697304	±	0.0621323	0.0239698	±	0.0247496	0.0152535	±	0.0136083	0.0196117	±	0.0339684	0.0414025	±	0.0247496	0.0326861	±	0.0235703	0.0196117	±	0.0172959	0.0261489	±	0.0172959	0.0326861	±
OTU553	Proteobacteria	Deltaproteobacteria	Deltaproteobacteria_unclassified	Deltaproteobacteria_unclassified	Deltaproteobacteria_unclassified	0.0217908	±	0.0210143	0.0196117	±	0	0.0305071	±	0.0247496	0.0414025	±	0.0164517	0.0305071	±	0.0210143	0.0217908	±	0.0199716	0.0457606	±	8.49837e-18	0.0305071	±	0.0264199	0.0414025	±	0.0164517	0.0479397	±	0.0164517	0.0152535	±	0.00754854	0.0348652	±	0.0136083	0.0130745	±	0.0172959	0.0174326	±	0.00998578	0.0370443	±
OTU648	Firmicutes	Bacilli	Bacillales	Bacillaceae_1	Bacillus	0.0435815	±	0.0264199	0.0348652	±	0.0329033	0.0326861	±	0.0130745	0.0479397	±	0.022958	0.0348652	±	0.00377427	0.0457606	±	0.0172959	0.0348652	±	0.022958	0.0435815	±	0.029478	0.0261489	±	0.00653723	0.0239698	±	0.00998578	0.0414025	±	0.0507776	0.0196117	±	0.0172959	0.0152535	±	0.0136083	0.0152535	±	0.00998578	0.028328	±
OTU507	Proteobacteria	Gammaproteobacteria	Enterobacteriales	Enterobacteriaceae	Serratia	0	±	0	0	±	0	0.00217908	±	0.00377427	0	±	0	0	±	0	0	±	0	0	±	0	0	±	0	0	±	0	0	±	0	0	±	0	0.00435815	±	0.00754854	0	±	0	0	±	0	0	±
OTU428	Proteobacteria	Alphaproteobacteria	Rhodospirillales	Rhodospirillales_unclassified	Rhodospirillales_unclassified	0.0305071	±	0.0247496	0.0217908	±	0.0164517	0.0305071	±	0.00754854	0.00871631	±	0.00377427	0.0130745	±	0.0172959	0.0152535	±	0.00998578	0.0174326	±	0.00998578	0.0108954	±	0.0136083	0.0217908	±	0.0136083	0.0479397	±	0.0164517	0.0326861	±	0.0130745	0.0457606	±	0.0326861	0.0261489	±	0.0130745	0.0261489	±	0.0284951	0.0130745	±
OTU393	Proteobacteria	Alphaproteobacteria	Rhizobiales	Rhizobiales_incertae_sedis	Bauldia	0.0261489	±	0.0226456	0.0152535	±	0.00998578	0.0239698	±	0.00754854	0.0435815	±	0.0420285	0.0261489	±	0.0113228	0.0305071	±	0.0247496	0.0239698	±	0.0136083	0.0217908	±	0.00377427	0.0130745	±	0.0113228	0.0196117	±	0	0.0196117	±	0	0.0239698	±	0.00998578	0.0348652	±	0.0199716	0.0326861	±	0.0345918	0.0174326	±
OTU411	Bacteria_unclassified	Bacteria_unclassified	Bacteria_unclassified	Bacteria_unclassified	Bacteria_unclassified	0.0196117	±	0.0172959	0.0196117	±	0.0172959	0.0348652	±	0.0164517	0.0174326	±	0.00998578	0.0152535	±	0.00754854	0.0348652	±	0.0199716	0.0326861	±	0.040825	0.028328	±	0.0136083	0.0261489	±	0.0130745	0.0326861	±	0.0172959	0.0261489	±	0.00653723	0.0217908	±	0.0199716	0.0174326	±	0.00998578	0.0174326	±	0.00998578	0.0196117	±
OTU397	Proteobacteria	Betaproteobacteria	Burkholderiales	Burkholderiales_incertae_sedis	Mitsuaria	0	±	0	0	±	0	0	±	0	0	±	0	0.00435815	±	0.00754854	0.00217908	±	0.00377427	0.00435815	±	0.00754854	0	±	0	0	±	0	0	±	0	0.00217908	±	0.00377427	0.00217908	±	0.00377427	0	±	0	0.0435815	±	0.0425339	0.0326861	±
OTU764	Planctomycetes	Planctomycetia	Planctomycetales	Planctomycetaceae	Planctomycetaceae_unclassified	0.0239698	±	0.0199716	0.0174326	±	0.00754854	0.0261489	±	0.0284951	0.0305071	±	0.00998578	0.0348652	±	0.0335465	0.0152535	±	0.0136083	0.0326861	±	0.0130745	0.0370443	±	0.00998578	0.0152535	±	0.0136083	0.0414025	±	0.0329033	0.0196117	±	0.0113228	0.0261489	±	0.0226456	0.0152535	±	0.0164517	0.0348652	±	0.0210143	0.0457606	±
OTU824	Proteobacteria	Alphaproteobacteria	Rhodospirillales	Rhodospirillaceae	Rhodospirillaceae_unclassified	0.0196117	±	0.00653723	0.0130745	±	2.12459e-18	0.0152535	±	0.00754854	0.0261489	±	0.00653723	0.0174326	±	0.00377427	0.0239698	±	0.00377427	0.0217908	±	0.0272167	0.0261489	±	0.0235703	0.0305071	±	0.00377427	0.0130745	±	0.00653723	0.0305071	±	0.0150971	0.0261489	±	0.0130745	0.0239698	±	0.0164517	0.0392234	±	0.00653723	0.0174326	±
OTU574	Acidobacteria	Acidobacteria_Gp3	Gp3	Gp3_unclassified	Gp3_unclassified	0.00871631	±	0.00998578	0	±	0	0.0217908	±	0.0136083	0.00653723	±	0.00653723	0.0196117	±	0.00653723	0.0239698	±	0.0247496	0.0588351	±	0.0363978	0.0196117	±	0.0172959	0.028328	±	0.029478	0.0305071	±	0.0188714	0.0174326	±	0.00377427	0.0305071	±	0.0308937	0.0239698	±	0.00998578	0.028328	±	0.022958	0.028328	±
OTU581	Proteobacteria	Alphaproteobacteria	Rhizobiales	Rhizobiaceae	Kaistia	0.0217908	±	0.00754854	0.0196117	±	0.0284951	0.0174326	±	0.0136083	0.0152535	±	0.0136083	0.028328	±	0.0199716	0.0130745	±	0.0130745	0.0108954	±	0.0136083	0.0130745	±	0.0113228	0.0893421	±	0.154745	0.0457606	±	0.0682507	0.00435815	±	0.00377427	0.00217908	±	0.00377427	0.00653723	±	0.00653723	0.0239698	±	0.0247496	0.056656	±
OTU9479	Planctomycetes	Planctomycetia	Planctomycetales	Planctomycetaceae	Planctomycetaceae_unclassified	0.0457606	±	0.0196117	0.0239698	±	0.00754854	0.0196117	±	0.00653723	0.0414025	±	0.0150971	0.0392234	±	0.0339684	0.0174326	±	0.00377427	0.0130745	±	0.0113228	0.0326861	±	0.00653723	0.0261489	±	0.00653723	0.0261489	±	0.0172959	0.0305071	±	0.00754854	0.028328	±	0.0164517	0.0130745	±	0.0113228	0.0217908	±	0.022958	0.00871631	±
OTU6492	Bacteroidetes	Sphingobacteriia	Sphingobacteriales	Chitinophagaceae	Flavisolibacter	0.0414025	±	0.00377427	0.0414025	±	0.0136083	0.0370443	±	0.00998578	0.0326861	±	0.00653723	0.028328	±	0.0164517	0.0261489	±	0.0196117	0.028328	±	0.022958	0.0217908	±	0.0164517	0.0174326	±	0.00754854	0.0152535	±	0.0164517	0.0174326	±	0.00998578	0.0174326	±	0.0164517	0.0152535	±	0.00377427	0.0108954	±	0.00377427	0.0174326	±
OTU386	Acidobacteria	Acidobacteria_Gp6	Gp6	Gp6_unclassified	Gp6_unclassified	0.00217908	±	0.00377427	0	±	0	0.00217908	±	0.00377427	0.0108954	±	0.00754854	0.0217908	±	0.00377427	0.0152535	±	0.00998578	0.0239698	±	0.0264199	0.0239698	±	0.0210143	0.0457606	±	0.0535095	0.0152535	±	0.00998578	0.0326861	±	0.0113228	0.00653723	±	0.00653723	0.0130745	±	0.0130745	0.0414025	±	0.0264199	0.0326861	±
OTU425	Gemmatimonadetes	Gemmatimonadetes	Gemmatimonadales	Gemmatimonadaceae	Gemmatimonas	0.00653723	±	0.00653723	0.00217908	±	0.00377427	0.00435815	±	0.00377427	0.00217908	±	0.00377427	0.056656	±	0.045916	0.028328	±	0.0199716	0.0631932	±	0.0555985	0.0217908	±	0.0322474	0.0370443	±	0.0371723	0.0174326	±	0.0188714	0.0414025	±	0.0360043	0.0217908	±	0.0210143	0.0217908	±	0.00998578	0.0326861	±	0.0397644	0.0305071	±
OTU422	Actinobacteria	Actinobacteria	Actinobacteria_unclassified	Actinobacteria_unclassified	Actinobacteria_unclassified	0.0174326	±	0.0247496	0.0152535	±	0.00754854	0.0392234	±	0.0623612	0.0326861	±	0	0.0326861	±	0.0261489	0.0217908	±	0.0210143	0.0305071	±	0.0150971	0.0414025	±	0.00998578	0.0370443	±	0.022958	0.0261489	±	0.00653723	0.0370443	±	0.0264199	0.0326861	±	0.0299573	0.00871631	±	0.00754854	0.00871631	±	0.00754854	0.0130745	±
OTU406	Proteobacteria	Gammaproteobacteria	Xanthomonadales	Sinobacteraceae	Povalibacter	0.0544769	±	0.00377427	0.0370443	±	0.00377427	0.0675514	±	0.0264199	0.0326861	±	0.00653723	0.0196117	±	0.0172959	0.0239698	±	0.0210143	0.0130745	±	0.00653723	0.0196117	±	0.0196117	0.0392234	±	0.0284951	0.028328	±	0.022958	0.0392234	±	0.0235703	0.0217908	±	0.0164517	0.00871631	±	0.00754854	0.0196117	±	0.0130745	0.0239698	±
OTU430	Chloroflexi	Thermomicrobia	Sphaerobacterales	Sphaerobacteraceae	Nitrolancea	0.0174326	±	0.0301942	0.0261489	±	0.0172959	0.0261489	±	0.0172959	0.0239698	±	0.0136083	0.0414025	±	0.00998578	0.028328	±	0.0136083	0.028328	±	0.00998578	0.0261489	±	0.0196117	0.0326861	±	0.0172959	0.0305071	±	0.0308937	0.0217908	±	0.0164517	0.0370443	±	0.0247496	0.0108954	±	0.00998578	0.0152535	±	0.0150971	0.0152535	±
OTU689	Firmicutes	Negativicutes	Selenomonadales	Veillonellaceae	Pelosinus	0.0414025	±	0.0425339	0.0261489	±	0.0113228	0.0414025	±	0.0188714	0.0217908	±	0.022958	0.028328	±	0.0136083	0.0196117	±	0.0235703	0.0414025	±	0.029478	0.0152535	±	0.00754854	0.0217908	±	0.00754854	0.0108954	±	0.00754854	0.0326861	±	0.0235703	0.0196117	±	0.0113228	0.00653723	±	0.00653723	0.0915212	±	0.141573	0.0217908	±
OTU308	Firmicutes	Firmicutes_unclassified	Firmicutes_unclassified	Firmicutes_unclassified	Firmicutes_unclassified	0.00435815	±	0.00377427	0.00871631	±	0.00754854	0.0174326	±	0.00754854	0.0108954	±	0.00377427	0.0610141	±	0.0264199	0.0501188	±	0.0264199	0.0697304	±	0.00754854	0.0414025	±	0.0210143	0.0217908	±	0.0150971	0.0130745	±	0.0172959	0.0217908	±	0.00377427	0.0239698	±	0.0136083	0.0217908	±	0.022958	0.0196117	±	0.0130745	0.028328	±
OTU698	Planctomycetes	Planctomycetia	Planctomycetales	Planctomycetaceae	Planctomycetaceae_unclassified	0.00871631	±	0.00998578	0.0108954	±	0.00754854	0.00435815	±	0.00754854	0.0130745	±	0.00653723	0.0108954	±	0.00998578	0.0239698	±	0.00998578	0.0196117	±	0.0196117	0.0108954	±	0.00754854	0.028328	±	0.00754854	0.0130745	±	0.0113228	0.0370443	±	0.0301942	0.0414025	±	0.0150971	0.0239698	±	0.022958	0.0305071	±	0.00377427	0.0392234	±
OTU14342	Actinobacteria	Actinobacteria	Actinomycetales	Microbacteriaceae	Cryobacterium	0.0217908	±	0.00998578	0.0217908	±	0.0272167	0.0457606	±	0.0130745	0.0261489	±	0.0113228	0.0261489	±	0.0113228	0.0217908	±	0.0136083	0.0435815	±	0.0150971	0.0305071	±	0.0136083	0.0348652	±	0.029478	0.0348652	±	0.00998578	0.028328	±	0.00998578	0.0239698	±	0.0164517	0.0305071	±	0.022958	0.0239698	±	0.0164517	0.0152535	±
OTU399	Actinobacteria	Actinobacteria	Gaiellales	Gaiellaceae	Gaiella	0.0305071	±	0.00998578	0.0522978	±	0.0284951	0.0457606	±	0.0452913	0.0261489	±	0.0172959	0.0348652	±	0.0136083	0.0174326	±	0.00754854	0.0152535	±	0.00377427	0.0196117	±	0.0113228	0.0174326	±	0.0199716	0.0326861	±	0.0172959	0.00653723	±	0.00653723	0.0217908	±	0.0199716	0.0370443	±	0.00377427	0.0217908	±	0.00998578	0.0174326	±
OTU449	Chloroflexi	Thermomicrobia	Sphaerobacterales	Sphaerobacteraceae	Nitrolancea	0.0217908	±	0.0199716	0.0261489	±	0.0130745	0.0130745	±	0.00653723	0.0305071	±	0.0199716	0.0370443	±	0.00998578	0.0196117	±	0.0284951	0.0370443	±	0.00998578	0.0305071	±	0.00377427	0.0392234	±	0.0569902	0.0305071	±	0.0136083	0.0348652	±	0.00754854	0.0261489	±	0.0226456	0.0130745	±	0.0172959	0.0130745	±	0.0226456	0.0261489	±
OTU313	Candidatus_Saccharibacteria	Candidatus_Saccharibacteria_unclassified	Candidatus_Saccharibacteria_unclassified	Candidatus_Saccharibacteria_unclassified	Candidatus_Saccharibacteria_unclassified	0.00653723	±	0.0113228	0.00217908	±	0.00377427	0	±	0	0.00217908	±	0.00377427	0.0108954	±	0.00998578	0.0305071	±	0.0210143	0.0152535	±	0.00377427	0.0784468	±	0.0962994	0.0544769	±	0.0199716	0.056656	±	0.0371723	0.0414025	±	0.0164517	0.0392234	±	0.0226456	0.00653723	±	0.0113228	0.028328	±	0.00998578	0.0326861	±
OTU4457	Acidobacteria	Acidobacteria_Gp6	Gp6	Gp6_unclassified	Gp6_unclassified	0.0435815	±	0.00998578	0.0326861	±	0.0172959	0.0261489	±	0.0196117	0.0174326	±	0.00998578	0.0196117	±	0.0339684	0.00653723	±	0.0113228	0.0239698	±	0.0210143	0.0326861	±	0.0299573	0.0305071	±	0.0210143	0.0152535	±	0.0164517	0.0392234	±	0.0299573	0.0108954	±	0.00377427	0.0239698	±	0.0308937	0.0261489	±	0.0172959	0.0479397	±
OTU396	Planctomycetes	Phycisphaerae	Tepidisphaerales	Tepidisphaeraceae	Tepidisphaera	0	±	0	0	±	0	0	±	0	0	±	0	0	±	0	0	±	0	0	±	0	0	±	0	0	±	0	0	±	0	0	±	0	0	±	0	0	±	0	0.0697304	±	0.109649	0.00871631	±
OTU6180	Actinobacteria	Actinobacteria	Actinomycetales	Streptomycetaceae	Streptomyces	0.0130745	±	0.0113228	0.0305071	±	0.00998578	0.0522978	±	0.0345918	0.0326861	±	0.0284951	0.0196117	±	0.0130745	0.00653723	±	0.00653723	0.0348652	±	0.0136083	0.0261489	±	0.0172959	0.0174326	±	0.00377427	0.0152535	±	0.00998578	0.0239698	±	0.00754854	0.0217908	±	0.0150971	0.0108954	±	0.0136083	0.0130745	±	2.12459e-18	0.028328	±
OTU3070	Proteobacteria	Alphaproteobacteria	Sphingomonadales	Sphingomonadaceae	Novosphingobium	0.00217908	±	0.00377427	0.0108954	±	0.0136083	0.00217908	±	0.00377427	0.00217908	±	0.00377427	0.00217908	±	0.00377427	0	±	0	0.00435815	±	0.00754854	0	±	0	0.00653723	±	0.00653723	0.00435815	±	0.00377427	0.00435815	±	0.00754854	0.00653723	±	0.00653723	0.0392234	±	0.0623612	0.0217908	±	0.022958	0.00871631	±
OTU8548	Verrucomicrobia	Verrucomicrobiae	Verrucomicrobiales	Verrucomicrobiaceae	Roseimicrobium	0	±	0	0.00217908	±	0.00377427	0.00217908	±	0.00377427	0	±	0	0.0130745	±	0.0130745	0.0217908	±	0.0150971	0.0152535	±	0.00998578	0.00653723	±	0.00653723	0.0196117	±	0.0172959	0.0217908	±	0.0322474	0.0261489	±	0.00653723	0.0457606	±	0.0428675	0.0479397	±	0.022958	0.0326861	±	0.0284951	0.0261489	±
OTU548	Planctomycetes	Planctomycetia	Planctomycetales	Planctomycetaceae	Planctomycetaceae_unclassified	0.0174326	±	0.0136083	0.0108954	±	0.00998578	0.0348652	±	0.00377427	0.0152535	±	0.00377427	0.0152535	±	0.00998578	0.0217908	±	0.0136083	0.0130745	±	0.0113228	0.0130745	±	0.0113228	0.0261489	±	0.00653723	0.0544769	±	0.083034	0.0217908	±	0.0136083	0.0196117	±	0.0172959	0.028328	±	0.0272167	0.0239698	±	0.00754854	0.0305071	±
OTU864	Actinobacteria	Actinobacteria	Actinobacteria_unclassified	Actinobacteria_unclassified	Actinobacteria_unclassified	0.0392234	±	0.0113228	0.056656	±	0.00754854	0.0457606	±	0.0326861	0.0479397	±	0.00998578	0.0217908	±	0.00998578	0.028328	±	0.0188714	0.00653723	±	0.00653723	0.0108954	±	0.0188714	0.00871631	±	0.00754854	0.0435815	±	0.0394045	0.00217908	±	0.00377427	0.0130745	±	0.0113228	0.00217908	±	0.00377427	0.00217908	±	0.00377427	0.0174326	±
OTU1327	Actinobacteria	Actinobacteria	Actinomycetales	Microbacteriaceae	Agromyces	0.00871631	±	0.00754854	0.00653723	±	0.00653723	0	±	0	0.00653723	±	0.00653723	0.00435815	±	0.00377427	0.00217908	±	0.00377427	0.00653723	±	0.0113228	0.00653723	±	0.00653723	0.0152535	±	0.0164517	0.0217908	±	0.0136083	0.0196117	±	0.0196117	0.0152535	±	0.0210143	0.0239698	±	0.0264199	0.0479397	±	0.041517	0.0217908	±
OTU587	Actinobacteria	Actinobacteria	Acidimicrobiales	Acidimicrobiales_unclassified	Acidimicrobiales_unclassified	0.0348652	±	0.0136083	0.0196117	±	0.0172959	0.0152535	±	0.00377427	0.0261489	±	0.0196117	0.0108954	±	0.0136083	0.0305071	±	0.0199716	0.0196117	±	0.0113228	0.0217908	±	0.0136083	0.0196117	±	0.0130745	0.0152535	±	0.00754854	0.0217908	±	0.0164517	0.0196117	±	0.0172959	0.0130745	±	0.00653723	0.0326861	±	0.0172959	0.0348652	±
OTU893	Actinobacteria	Thermoleophilia	Thermoleophilales	Thermoleophilaceae	Thermoleophilum	0.0174326	±	0.00754854	0.0174326	±	0.00377427	0.00653723	±	0.00653723	0.0217908	±	0.00377427	0.0370443	±	0.00754854	0.0392234	±	0.0235703	0.028328	±	0.00998578	0.0348652	±	0.0210143	0.0239698	±	0.0136083	0.0326861	±	0.0284951	0.0305071	±	0.00998578	0.0239698	±	0.0210143	0.0217908	±	0.0136083	0.0108954	±	0.00998578	0.0348652	±
OTU6536	Actinobacteria	Actinobacteria	Actinomycetales	Nocardioidaceae	Nocardioides	0.0239698	±	0.00377427	0.0305071	±	0.0188714	0.0457606	±	0.0172959	0.0370443	±	0.00377427	0.0130745	±	0.0113228	0.0239698	±	0.0199716	0.0370443	±	0.0164517	0.0588351	±	0.0471406	0.0305071	±	0.0308937	0.0130745	±	0.00653723	0.0152535	±	0.0164517	0.0239698	±	0.00998578	0.0196117	±	0	0.0217908	±	0.00377427	0.0239698	±
OTU865	Bacteria_unclassified	Bacteria_unclassified	Bacteria_unclassified	Bacteria_unclassified	Bacteria_unclassified	0.00653723	±	0.00653723	0.0152535	±	0.0164517	0.0108954	±	0.0188714	0.0152535	±	0.00377427	0.0152535	±	0.0150971	0.00217908	±	0.00377427	0.0610141	±	0.0247496	0.0392234	±	0.0226456	0.0261489	±	0.0235703	0.0261489	±	0.0130745	0.0348652	±	0.0164517	0.0152535	±	0.00998578	0.0130745	±	0.0113228	0.0305071	±	0.00998578	0.0370443	±
OTU448	Verrucomicrobia	Subdivision3	Subdivision3_unclassified	Subdivision3_unclassified	Subdivision3_unclassified	0.0108954	±	0.00377427	0.00435815	±	0.00377427	0.0174326	±	0.0164517	0.0196117	±	0.0113228	0.0305071	±	0.022958	0.0326861	±	0.00653723	0.0152535	±	0.00998578	0.028328	±	0.0150971	0.0196117	±	0.0130745	0.028328	±	0.00998578	0.0196117	±	0.00653723	0.056656	±	0.022958	0.0239698	±	0.0188714	0.0239698	±	0.00998578	0.0239698	±
OTU776	Proteobacteria	Alphaproteobacteria	Rhizobiales	Methylocystaceae	Pleomorphomonas	0.00217908	±	0.00377427	0	±	0	0	±	0	0	±	0	0.00653723	±	0.0113228	0.00217908	±	0.00377427	0.00653723	±	0.00653723	0	±	0	0	±	0	0.00217908	±	0.00377427	0.00435815	±	0.00377427	0.0130745	±	0.0130745	0.00871631	±	0.00998578	0.028328	±	0.0264199	0.0217908	±
OTU492	Actinobacteria	Actinobacteria	Actinomycetales	Actinomycetales_unclassified	Actinomycetales_unclassified	0.0196117	±	0.0172959	0.0217908	±	0.022958	0.0196117	±	0	0.0305071	±	0.0247496	0.0326861	±	0.0196117	0.0414025	±	0.0199716	0.0196117	±	0.0235703	0.028328	±	0.0164517	0.0217908	±	0.00377427	0.0261489	±	0.0235703	0.0130745	±	0.0113228	0.0348652	±	0.0210143	0.0174326	±	0.0136083	0.0326861	±	0.0226456	0.0196117	±
OTU558	Proteobacteria	Betaproteobacteria	Betaproteobacteria_unclassified	Betaproteobacteria_unclassified	Betaproteobacteria_unclassified	0.0196117	±	0.0130745	0.0217908	±	0.0136083	0.0174326	±	0.0188714	0.0217908	±	0.00377427	0.0152535	±	0.0136083	0.0217908	±	0.0210143	0.0196117	±	0.00653723	0.0152535	±	0.00377427	0.0239698	±	0.0247496	0.028328	±	0.0264199	0.0261489	±	0.0299573	0.0217908	±	0.0136083	0.00653723	±	1.0623e-18	0.00871631	±	0.00998578	0.028328	±
OTU421	Bacteroidetes	Cytophagia	Cytophagales	Ohtaekwangia	Ohtaekwangia_unclassified	0.0130745	±	0.00653723	0.0152535	±	0.0136083	0.0152535	±	0.00377427	0.0217908	±	0.00377427	0.0457606	±	0.0130745	0.028328	±	0.0136083	0.0457606	±	0.0235703	0.028328	±	0.00377427	0.0370443	±	0.0164517	0.0239698	±	0.0308937	0.0152535	±	0.00377427	0.0261489	±	0.0226456	0.0261489	±	0.0196117	0.0239698	±	0.00754854	0.0174326	±
OTU839	Chloroflexi	Anaerolineae	Anaerolineales	Anaerolineaceae	Longilinea	0.0130745	±	2.12459e-18	0.00435815	±	0.00377427	0.0174326	±	0.00377427	0.0239698	±	0.0136083	0.0174326	±	0.0188714	0.0130745	±	0.00653723	0.0457606	±	0.0284951	0.0479397	±	0.0335465	0.00871631	±	0.00377427	0.0392234	±	0.0113228	0.0196117	±	0.0235703	0.0217908	±	0.00998578	0.0239698	±	0.00754854	0.028328	±	0.00754854	0.0152535	±
OTU1629	Acidobacteria	Acidobacteria_Gp6	Gp6	Gp6_unclassified	Gp6_unclassified	0.028328	±	0.0164517	0.0610141	±	0.0164517	0.0326861	±	0.0261489	0.0370443	±	0.0164517	0.0239698	±	0.0136083	0.0217908	±	0.00377427	0.028328	±	0.0199716	0.0108954	±	0.00754854	0.0108954	±	0.00998578	0.028328	±	0.0383047	0.0239698	±	0.0164517	0.0305071	±	0.00998578	0.0152535	±	0.00377427	0.0152535	±	0.0164517	0.0305071	±
OTU382	Gemmatimonadetes	Gemmatimonadetes	Gemmatimonadales	Gemmatimonadaceae	Gemmatimonas	0.00871631	±	0.00998578	0.0217908	±	0.00754854	0.0108954	±	0.00998578	0.0108954	±	0.00998578	0.0457606	±	0.00653723	0.0174326	±	0.00754854	0.0588351	±	0.0235703	0.0348652	±	0.022958	0.0544769	±	0.0150971	0.0217908	±	0.00754854	0.0130745	±	0.00653723	0.0108954	±	0.00998578	0.0174326	±	0.00754854	0.0370443	±	0.022958	0.0108954	±
OTU653	Proteobacteria	Deltaproteobacteria	Myxococcales	Labilitrichaceae	Labilithrix	0.0305071	±	0.00998578	0.0196117	±	0.00653723	0.0457606	±	0.0196117	0.0392234	±	0	0.0239698	±	0.0150971	0.0108954	±	0.00377427	0.0326861	±	0.0299573	0.0370443	±	0.0164517	0.0370443	±	0.0136083	0.0152535	±	0.00998578	0.00871631	±	0.00377427	0.0261489	±	0.00653723	0.0130745	±	0.0172959	0.0152535	±	0.0136083	0.0305071	±
OTU601	Firmicutes	Bacilli	Bacillales	Bacillaceae_2	Compostibacillus	0.0392234	±	0.0172959	0.0370443	±	0.0164517	0.0305071	±	0.0308937	0.0305071	±	0.00754854	0.0174326	±	0.0136083	0.028328	±	0.022958	0.0239698	±	0.022958	0.0152535	±	0.00377427	0.0196117	±	0.0172959	0.0130745	±	0.0130745	0.0261489	±	0.0196117	0.0152535	±	0.00998578	0.00871631	±	0.00998578	0.0217908	±	0.00754854	0.0152535	±
OTU631	Candidatus_Saccharibacteria	Candidatus_Saccharibacteria_unclassified	Candidatus_Saccharibacteria_unclassified	Candidatus_Saccharibacteria_unclassified	Candidatus_Saccharibacteria_unclassified	0	±	0	0	±	0	0	±	0	0	±	0	0	±	0	0	±	0	0.00435815	±	0.00377427	0	±	0	0	±	0	0.0108954	±	0.00998578	0.0130745	±	0.0226456	0.0631932	±	0.0644948	0.0544769	±	0.0528398	0.0305071	±	0.0371723	0.028328	±
OTU588	Latescibacteria	Latescibacteria_unclassified	Latescibacteria_unclassified	Latescibacteria_unclassified	Latescibacteria_unclassified	0.028328	±	0.00998578	0.00217908	±	0.00377427	0.0457606	±	0.0196117	0.0457606	±	0.00653723	0.0196117	±	0.0196117	0.0152535	±	0.00998578	0.0130745	±	0.00653723	0.00871631	±	0.00998578	0.0239698	±	0.0247496	0.0414025	±	0.0377427	0.028328	±	0.00998578	0.0261489	±	0.0235703	0.0174326	±	0.0199716	0.0305071	±	0.0136083	0.0152535	±
OTU773	Acidobacteria	Acidobacteria_Gp10	Gp10	Gp10_unclassified	Gp10_unclassified	0	±	0	0	±	0	0.00217908	±	0.00377427	0	±	0	0	±	0	0.0217908	±	0.022958	0.0174326	±	0.0247496	0.00217908	±	0.00377427	0.0522978	±	0.0623612	0.00435815	±	0.00377427	0.0392234	±	0.0392234	0.00217908	±	0.00377427	0.0261489	±	0.0226456	0.0152535	±	0.00998578	0.0370443	±
OTU325	Candidatus_Saccharibacteria	Candidatus_Saccharibacteria_unclassified	Candidatus_Saccharibacteria_unclassified	Candidatus_Saccharibacteria_unclassified	Candidatus_Saccharibacteria_unclassified	0	±	0	0	±	0	0	±	0	0	±	0	0.0130745	±	0.0172959	0.00653723	±	0.0113228	0.00653723	±	0.0113228	0.0108954	±	0.0136083	0.0217908	±	0.0210143	0.0740886	±	0.101345	0.0414025	±	0.0717112	0.0348652	±	0.0329033	0.0631932	±	0.022958	0.0174326	±	0.0188714	0.0610141	±
OTU1389	Bacteria_unclassified	Bacteria_unclassified	Bacteria_unclassified	Bacteria_unclassified	Bacteria_unclassified	0.0108954	±	0.00377427	0.0130745	±	0.0130745	0.0174326	±	0.00998578	0.00653723	±	0.0113228	0.0305071	±	0.022958	0.0414025	±	0.0164517	0.0326861	±	0.0130745	0.0130745	±	0.0172959	0.0479397	±	0.044498	0.0435815	±	0.00377427	0.0370443	±	0.00998578	0.0348652	±	0.0210143	0.0174326	±	0.00377427	0.0152535	±	0.0210143	0.028328	±
OTU427	Actinobacteria	Actinobacteria	Acidimicrobiales	Acidimicrobiales_unclassified	Acidimicrobiales_unclassified	0.00653723	±	0.00653723	0.0239698	±	0.0188714	0.0392234	±	0.0172959	0.0152535	±	0.00377427	0.0239698	±	0.00998578	0.0174326	±	0.0136083	0.0348652	±	0.043527	0.0239698	±	0.0247496	0.0108954	±	0.00998578	0.0217908	±	0.00998578	0.0174326	±	0.00377427	0.0174326	±	0.0199716	0.0217908	±	0.00998578	0.0261489	±	0.0130745	0.0152535	±
OTU664	Planctomycetes	Planctomycetia	Planctomycetales	Planctomycetaceae	Planctomycetaceae_unclassified	0.0108954	±	0.00754854	0.0239698	±	0.0136083	0.00653723	±	0.00653723	0.0348652	±	0.00998578	0.0326861	±	0.0113228	0.0108954	±	0.0136083	0.0152535	±	0.00377427	0.0130745	±	0.00653723	0.0370443	±	0.0472915	0.0130745	±	0.00653723	0.0174326	±	0.00998578	0.0392234	±	0.0284951	0.0217908	±	0.0164517	0.00871631	±	0.00754854	0.0152535	±
OTU528	Proteobacteria	Alphaproteobacteria	Rhizobiales	Rhizobiales_unclassified	Rhizobiales_unclassified	0.00653723	±	0.00653723	0.0152535	±	0.00754854	0.0152535	±	0.0210143	0.0174326	±	0.00377427	0.0239698	±	0.022958	0.0174326	±	0.00754854	0.0108954	±	0.00998578	0.0217908	±	0.0164517	0.0326861	±	0.0113228	0.0239698	±	0.00377427	0.0501188	±	0.0136083	0.0196117	±	0.0196117	0.0239698	±	0.00754854	0.0326861	±	0.0363978	0.0370443	±
OTU6587	Proteobacteria	Betaproteobacteria	Burkholderiales	Comamonadaceae	Hydrogenophaga	0.00435815	±	0.00754854	0	±	0	0.00217908	±	0.00377427	0	±	0	0.0479397	±	0.0210143	0.056656	±	0.0644948	0.0719095	±	0.0962994	0.0762677	±	0.043527	0.0130745	±	0.0130745	0.0217908	±	0.0272167	0.0196117	±	0.0196117	0.00653723	±	0.00653723	0.0196117	±	0.00653723	0.00871631	±	0.00998578	0.0108954	±
OTU598	Chloroflexi	Chloroflexi_unclassified	Chloroflexi_unclassified	Chloroflexi_unclassified	Chloroflexi_unclassified	0.0239698	±	0.00998578	0.0217908	±	0.0322474	0.0174326	±	0.00377427	0.0108954	±	0.00754854	0.028328	±	0.0199716	0.0196117	±	0.0235703	0.0196117	±	0.0113228	0.0217908	±	0.00377427	0.0217908	±	0.00998578	0.0326861	±	0.0235703	0.00435815	±	0.00377427	0.00871631	±	0.0150971	0.0261489	±	0.0130745	0.0196117	±	0.00653723	0.0130745	±
OTU5404	Proteobacteria	Gammaproteobacteria	Xanthomonadales	Sinobacteraceae	Sinobacteraceae_unclassified	0.0174326	±	0.0247496	0.0392234	±	0.0397644	0.0217908	±	0.00998578	0.0239698	±	0.0360043	0.0108954	±	0.00998578	0.0130745	±	0.0113228	0.0130745	±	0.0172959	0.00217908	±	0.00377427	0.0130745	±	2.12459e-18	0.0522978	±	8.49837e-18	0.0915212	±	0.0834618	0.0196117	±	0.0130745	0.028328	±	0.0377427	0.0174326	±	0.0301942	0.00435815	±
OTU6479	Proteobacteria	Gammaproteobacteria	Xanthomonadales	Xanthomonadaceae	Lysobacter	0.0457606	±	0.0363978	0.0196117	±	0.0113228	0.0348652	±	0.0264199	0.0196117	±	0.00653723	0.0370443	±	0.0210143	0.0217908	±	0.00998578	0.0196117	±	0.0196117	0.0196117	±	0.0113228	0.00871631	±	0.00377427	0.0130745	±	0.00653723	0.0239698	±	0.00377427	0.0174326	±	0.0188714	0.0130745	±	0.0130745	0.0174326	±	0.0150971	0.00871631	±
OTU476	Acidobacteria	Acidobacteria_Gp7	Gp7	Gp7_unclassified	Gp7_unclassified	0.0108954	±	0.0136083	0.0217908	±	0.0210143	0.00871631	±	0.00377427	0.0108954	±	0.00377427	0.00217908	±	0.00377427	0.0305071	±	0.0360043	0.0196117	±	0.00653723	0.0108954	±	0.00998578	0.0217908	±	0.00998578	0.00871631	±	0.00377427	0.0152535	±	0.0150971	0.0196117	±	0.00653723	0.0239698	±	0.0199716	0.0239698	±	0.0264199	0.0196117	±
OTU471	Planctomycetes	Planctomycetia	Planctomycetales	Planctomycetaceae	Pirellula	0.0130745	±	0.00653723	0.00653723	±	0.00653723	0.0152535	±	0.00998578	0.0108954	±	0.00377427	0.0217908	±	0.0164517	0.0217908	±	0.00998578	0.0239698	±	0.00377427	0.0130745	±	0.00653723	0.0152535	±	0.0164517	0.0305071	±	0.00998578	0.0305071	±	0.00754854	0.0435815	±	0.0188714	0.0217908	±	0.0272167	0.0326861	±	0.0172959	0.0305071	±
OTU791	Bacteria_unclassified	Bacteria_unclassified	Bacteria_unclassified	Bacteria_unclassified	Bacteria_unclassified	0.00435815	±	0.00377427	0.0326861	±	0.0172959	0.0174326	±	0.0136083	0.0217908	±	0.00377427	0.0130745	±	0.0130745	0.0196117	±	0.00653723	0.0261489	±	0.0196117	0.00435815	±	0.00377427	0.028328	±	0.0210143	0.0370443	±	0.0150971	0.0348652	±	0.0360043	0.0348652	±	0.0136083	0.0370443	±	0.00998578	0.0239698	±	0.0164517	0.0326861	±
OTU2152	Acidobacteria	Acidobacteria_Gp6	Gp6	Gp6_unclassified	Gp6_unclassified	0.0261489	±	0.00653723	0.0305071	±	0.0308937	0.0217908	±	0.0150971	0.0370443	±	0.00998578	0.0174326	±	0.0164517	0.0348652	±	0.0150971	0.0174326	±	0.0199716	0.0174326	±	0.0136083	0.0239698	±	0.0188714	0.0261489	±	0.0299573	0.0326861	±	0.0284951	0.0217908	±	0.0210143	0.0239698	±	0.00377427	0.0305071	±	0.0136083	0.028328	±
OTU561	Bacteroidetes	Cytophagia	Cytophagales	Cytophagales_unclassified	Cytophagales_unclassified	0.0196117	±	0.0284951	0.0108954	±	0.00754854	0.00435815	±	0.00754854	0.0196117	±	0.00653723	0.0152535	±	0.0210143	0.0239698	±	0.0136083	0.00653723	±	0.00653723	0.00871631	±	0.00754854	0.0130745	±	0.0113228	0.0326861	±	0.0113228	0.0261489	±	0.0284951	0.0305071	±	0.0264199	0.0261489	±	0.00653723	0.0326861	±	0.0284951	0.0152535	±
OTU1235	Nitrospirae	Nitrospira	Nitrospirales	Nitrospiraceae	Nitrospira	0.00871631	±	0.00754854	0.0152535	±	0.00754854	0.0130745	±	0.0172959	0.00871631	±	0.00377427	0.0305071	±	0.0472915	0.0261489	±	0.0113228	0.028328	±	0.0272167	0.0261489	±	0.00653723	0.0326861	±	0.040825	0.0326861	±	0.0235703	0.0326861	±	0.0261489	0.0326861	±	0.00653723	0.0239698	±	0.022958	0.0261489	±	0.0226456	0.0305071	±
OTU701	Chloroflexi	Chloroflexia	Kallotenuales	Kallotenuaceae	Kallotenue	0.0305071	±	0.0308937	0.0457606	±	0.00653723	0.0348652	±	0.00998578	0.0457606	±	8.49837e-18	0.0414025	±	0.0329033	0.0217908	±	0.00998578	0.0152535	±	0.00998578	0.0370443	±	0.0136083	0.0152535	±	0.00998578	0.00653723	±	0.0113228	0.0152535	±	0.0210143	0.0108954	±	0.00998578	0.00435815	±	0.00754854	0.0174326	±	0.0164517	0.0174326	±
OTU644	Actinobacteria	Actinobacteria	Gaiellales	Gaiellaceae	Gaiella	0.0392234	±	0.0326861	0.0261489	±	0.0172959	0.0392234	±	0.0172959	0.0435815	±	0.0210143	0.0370443	±	0.0308937	0.0305071	±	0.0150971	0.0152535	±	0.00754854	0.0217908	±	0.0150971	0.028328	±	0.022958	0.0326861	±	0.0130745	0.028328	±	0.0164517	0.0261489	±	0.0196117	0.0108954	±	0.00377427	0.0217908	±	0.0164517	0.0152535	±
OTU780	Acidobacteria	Acidobacteria_Gp6	Gp6	Gp6_unclassified	Gp6_unclassified	0.0239698	±	0.00754854	0.0261489	±	0.0235703	0.0261489	±	0.0130745	0.0326861	±	0.0172959	0.0239698	±	0.00377427	0.0305071	±	0.0136083	0.0196117	±	0.0130745	0.0305071	±	0.0199716	0.0152535	±	0.00998578	0.0130745	±	0.00653723	0.028328	±	0.0247496	0.0130745	±	0.00653723	0.0239698	±	0.0247496	0.0217908	±	0.00377427	0.00871631	±
OTU691	Planctomycetes	Planctomycetia	Planctomycetales	Planctomycetaceae	Gemmata	0.0130745	±	0.00653723	0	±	0	0.00871631	±	0.00754854	0.0152535	±	0.0150971	0.0239698	±	0.0308937	0.0196117	±	0.0113228	0.00871631	±	0.00754854	0.0174326	±	0.0199716	0.0196117	±	0.00653723	0.0239698	±	0.0136083	0.0130745	±	0.00653723	0.0108954	±	0.00754854	0.0174326	±	0.00377427	0.0435815	±	0.0399431	0.0479397	±
OTU433	Bacteroidetes	Sphingobacteriia	Sphingobacteriales	Chitinophagaceae	Lacibacter	0.0305071	±	0.0199716	0.0108954	±	0.0136083	0.0370443	±	0.0210143	0.0305071	±	0.0210143	0.0196117	±	0.0226456	0.0217908	±	0.0164517	0.0370443	±	0.0264199	0.0261489	±	0.0196117	0.0152535	±	0.0210143	0.0130745	±	0.00653723	0.0196117	±	0.0196117	0.0196117	±	0.00653723	0.0261489	±	0.0345918	0.00871631	±	0.0150971	0.0152535	±
OTU547	Planctomycetes	Phycisphaerae	Phycisphaerae_unclassified	Phycisphaerae_unclassified	Phycisphaerae_unclassified	0.00435815	±	0.00377427	0.0130745	±	0.00653723	0.0261489	±	0.0130745	0.0217908	±	0.00754854	0.0196117	±	0.0130745	0.0152535	±	0.00754854	0.0152535	±	0.00754854	0.0261489	±	0.00653723	0.0261489	±	0.0113228	0.0348652	±	0.022958	0.0305071	±	0.0136083	0.0217908	±	0.0136083	0.00435815	±	0.00377427	0.0239698	±	0.0301942	0.0196117	±
OTU434	Bacteroidetes	Sphingobacteriia	Sphingobacteriales	Chitinophagaceae	Flavisolibacter	0.0152535	±	0.00998578	0.0196117	±	0.00653723	0.0174326	±	0.0136083	0.0239698	±	0.00377427	0.0196117	±	0.0113228	0.0435815	±	0.00377427	0.0174326	±	0.0199716	0.0217908	±	0.0210143	0.0305071	±	0.00998578	0.0239698	±	0.00998578	0.0174326	±	0.00998578	0.0239698	±	0.00998578	0.0239698	±	0.0150971	0.0326861	±	0.0226456	0.00653723	±
OTU438	Actinobacteria	Actinobacteria	Actinomycetales	Nocardiaceae	Nocardia	0.0108954	±	0.00377427	0.0108954	±	0.00377427	0.0217908	±	0.0199716	0.0130745	±	0.00653723	0.0196117	±	0.0172959	0.0370443	±	0.0188714	0.0305071	±	0.0247496	0.0217908	±	0.0322474	0.0348652	±	0.0490655	0.0217908	±	0.0164517	0.0239698	±	0.0301942	0.0152535	±	0.0136083	0.0174326	±	0.00754854	0.00653723	±	0.0113228	0.0392234	±
OTU738	Proteobacteria	Alphaproteobacteria	Rhodobacterales	Rhodobacteraceae	Rhodobacteraceae_unclassified	0.00435815	±	0.00754854	0.00653723	±	0.0113228	0.00653723	±	0.0113228	0.00435815	±	0.00377427	0.0435815	±	0.0264199	0.0217908	±	0.0136083	0.0610141	±	0.0360043	0.028328	±	0.0188714	0.0370443	±	0.0264199	0.0108954	±	0.00998578	0.00435815	±	0.00377427	0.0108954	±	0.0136083	0.0261489	±	0.0397644	0.0217908	±	0.00754854	0.0108954	±
OTU569	Verrucomicrobia	Opitutae	Opitutales	Opitutaceae	Alterococcus	0.0305071	±	0.0136083	0.0305071	±	0.022958	0.0370443	±	0.029478	0.0348652	±	0.0199716	0.0348652	±	0.0136083	0.0261489	±	0.0130745	0.00871631	±	0.00377427	0.0174326	±	0.0136083	0.0414025	±	0.0164517	0.0479397	±	0.0150971	0.0130745	±	0.0113228	0.0217908	±	0.0210143	0.0305071	±	0.0164517	0.0152535	±	0.00754854	0.0239698	±
OTU1406	Actinobacteria	Actinobacteria	Solirubrobacterales	Solirubrobacterales_unclassified	Solirubrobacterales_unclassified	0.0196117	±	0	0.0108954	±	0.00754854	0.00435815	±	0.00754854	0.0305071	±	0.0164517	0.0392234	±	0.0196117	0.0196117	±	0	0.0305071	±	0.0199716	0.028328	±	0.0272167	0.028328	±	0.022958	0.0196117	±	0.0172959	0.0196117	±	0.0235703	0.0108954	±	0.0136083	0.0239698	±	0.0199716	0.0217908	±	0.0210143	0.0239698	±
OTU637	Proteobacteria	Alphaproteobacteria	Rhizobiales	Rhodobiaceae	Rhodoligotrophos	0.00871631	±	0.00377427	0.0130745	±	2.12459e-18	0.0130745	±	0.00653723	0.0130745	±	0.0113228	0.0392234	±	0.0566141	0.00653723	±	0.00653723	0.0261489	±	0.0345918	0.0174326	±	0.0136083	0.0326861	±	0.0299573	0.00435815	±	0.00377427	0.0435815	±	0.0383047	0.0239698	±	0.0210143	0.0239698	±	0.0264199	0.0174326	±	0.00754854	0.0152535	±
OTU717	Verrucomicrobia	Verrucomicrobiae	Verrucomicrobiales	Verrucomicrobiaceae	Prosthecobacter	0	±	0	0	±	0	0	±	0	0	±	0	0	±	0	0	±	0	0.00217908	±	0.00377427	0.00217908	±	0.00377427	0	±	0	0.00435815	±	0.00754854	0	±	0	0	±	0	0.0239698	±	0.041517	0.00653723	±	0.0113228	0	±
OTU10212	Planctomycetes	Planctomycetia	Planctomycetales	Planctomycetaceae	Gemmata	0.0152535	±	0.0164517	0.00871631	±	0.00998578	0	±	0	0.0130745	±	0.00653723	0.0174326	±	0.0164517	0.0108954	±	0.0188714	0.00871631	±	0.0150971	0.00871631	±	0.00377427	0.0217908	±	0.0164517	0.0196117	±	0.0130745	0.0305071	±	0.029478	0.0370443	±	0.0136083	0.0130745	±	0.00653723	0.0152535	±	0.0150971	0.0479397	±
OTU500	Proteobacteria	Betaproteobacteria	Burkholderiales	Comamonadaceae	Pelomonas	0.00217908	±	0.00377427	0	±	0	0.00217908	±	0.00377427	0.00217908	±	0.00377427	0.0174326	±	0.0136083	0.0196117	±	0.0235703	0.0196117	±	0.0339684	0.00871631	±	0.0150971	0.00871631	±	0.0150971	0.00653723	±	0.00653723	0.00435815	±	0.00754854	0.0130745	±	0.0130745	0.0326861	±	0.0113228	0.0370443	±	0.0335465	0.0261489	±
OTU907	Proteobacteria	Deltaproteobacteria	Myxococcales	Cystobacteraceae	Cystobacter	0.0239698	±	0.0301942	0.0196117	±	0.00653723	0.0196117	±	0.0196117	0.0239698	±	0.00754854	0.0108954	±	0.0136083	0.0479397	±	0.0555985	0.00653723	±	0.00653723	0.0174326	±	0.00754854	0.0152535	±	0.0164517	0.0501188	±	0.0490655	0.0130745	±	0.0130745	0.0152535	±	0.0150971	0.0196117	±	0.0196117	0.0392234	±	0.0172959	0.0414025	±
OTU432	Bacteria_unclassified	Bacteria_unclassified	Bacteria_unclassified	Bacteria_unclassified	Bacteria_unclassified	0	±	0	0.00871631	±	0.00377427	0.0174326	±	0.0188714	0.00653723	±	0.00653723	0.028328	±	0.0322474	0.0174326	±	0.0136083	0.0392234	±	0.0130745	0.0130745	±	0.0130745	0.028328	±	0.029478	0.0196117	±	0.0130745	0.0370443	±	0.0247496	0.0217908	±	0.0264199	0.00871631	±	0.00754854	0.0261489	±	0.0113228	0.0261489	±
OTU1228	Proteobacteria	Deltaproteobacteria	Myxococcales	Myxococcaceae	Myxococcus	0.0479397	±	0.00377427	0.0152535	±	0.00754854	0.00217908	±	0.00377427	0.0152535	±	0.0164517	0.0130745	±	0.0113228	0.0196117	±	0.0172959	0.00435815	±	0.00377427	0.0108954	±	0.00754854	0.0108954	±	0.00754854	0.00871631	±	0.0150971	0.0108954	±	0.00377427	0.0152535	±	0.0210143	0.00871631	±	0.00377427	0.0370443	±	0.0264199	0.0108954	±
OTU1722	Proteobacteria	Betaproteobacteria	Rhodocyclales	Rhodocyclaceae	Rhodocyclaceae_unclassified	0.00871631	±	0.00998578	0.00653723	±	1.0623e-18	0.00871631	±	0.00998578	0.0305071	±	0.0247496	0.0326861	±	0.0226456	0.0457606	±	0.0113228	0.0217908	±	0.0136083	0.0261489	±	0.0172959	0.0326861	±	0.0130745	0.0196117	±	0.0130745	0.0435815	±	0.00998578	0.0174326	±	0.0136083	0.0174326	±	0.0136083	0.0217908	±	0.0150971	0.0196117	±
OTU1388	Firmicutes	Bacilli	Bacillales	Planococcaceae	Sporosarcina	0.0326861	±	0.0113228	0.0326861	±	0.0113228	0.0326861	±	0.00653723	0.0392234	±	0.0113228	0.028328	±	0.022958	0.028328	±	0.0136083	0.0152535	±	0.00998578	0.0348652	±	0.0136083	0.0217908	±	0.0199716	0.0239698	±	0.00377427	0.0108954	±	0.00377427	0.0152535	±	0.00377427	0.00871631	±	0.00998578	0.0130745	±	0.0113228	0.0130745	±
OTU2638	candidate_division_WPS-1	candidate_division_WPS-1_unclassified	candidate_division_WPS-1_unclassified	candidate_division_WPS-1_unclassified	candidate_division_WPS-1_unclassified	0.00653723	±	0.00653723	0.0174326	±	0.0164517	0.00435815	±	0.00377427	0.00653723	±	0.00653723	0.0348652	±	0.0264199	0.00435815	±	0.00377427	0.0239698	±	0.00754854	0.0130745	±	0.00653723	0.0305071	±	0.0188714	0.00653723	±	0.00653723	0.0108954	±	0.0136083	0.0174326	±	0.00377427	0.0261489	±	0.0172959	0.0152535	±	0.0136083	0.0414025	±
OTU666	Acidobacteria	Acidobacteria_Gp3	Gp3	Gp3_unclassified	Gp3_unclassified	0.028328	±	0.0210143	0.028328	±	0.0150971	0.0457606	±	0.0226456	0.0239698	±	0.0164517	0.0130745	±	0.0113228	0.0108954	±	0.00998578	0.0108954	±	0.0136083	0.0130745	±	0.00653723	0.0130745	±	0.00653723	0.0130745	±	0.0113228	0.0239698	±	0.0136083	0.0130745	±	0.0113228	0.0152535	±	0.0136083	0.0261489	±	0.00653723	0.028328	±
OTU3206	Proteobacteria	Alphaproteobacteria	Caulobacterales	Caulobacteraceae	Phenylobacterium	0.0130745	±	0.0113228	0.028328	±	0.00377427	0.0239698	±	0.0199716	0.0108954	±	0.00998578	0.0217908	±	0.0136083	0.0217908	±	0.00377427	0.0675514	±	0.00754854	0.0326861	±	0.0363978	0.0196117	±	0.0113228	0.0174326	±	0.00377427	0.0174326	±	0.00998578	0.0174326	±	0.00998578	0.0305071	±	0.0164517	0.0370443	±	0.0301942	0.028328	±
OTU3239	Acidobacteria	Acidobacteria_Gp3	Gp3	Gp3_unclassified	Gp3_unclassified	0.0152535	±	0.00377427	0.0457606	±	0.049355	0.0261489	±	0.0235703	0.0261489	±	0.0172959	0.0348652	±	0.0322474	0.0305071	±	0.0164517	0.0152535	±	0.0210143	0.0108954	±	0.00998578	0.00871631	±	0.00754854	0.0174326	±	0.00754854	0.0326861	±	0	0.00653723	±	0.00653723	0.0326861	±	0	0.0196117	±	0.0113228	0.0239698	±
OTU670	Planctomycetes	Planctomycetia	Planctomycetales	Planctomycetaceae	Aquisphaera	0.028328	±	0.00377427	0.0152535	±	0.0150971	0.028328	±	0.029478	0.0196117	±	0	0.0108954	±	0.0136083	0.0217908	±	0.00377427	0.0130745	±	0.0130745	0.028328	±	0.022958	0.0108954	±	0.00377427	0.0196117	±	0.0130745	0.0261489	±	0.00653723	0.0130745	±	2.12459e-18	0.0196117	±	0.0284951	0.0261489	±	0.0113228	0.0326861	±
OTU10360	Firmicutes	Clostridia	Clostridiales	Clostridiaceae_1	Clostridium_sensu_stricto	0.0174326	±	0.0136083	0.028328	±	0.00377427	0.0305071	±	0.00998578	0.0261489	±	0.0172959	0.0152535	±	0.00754854	0.0479397	±	0.0188714	0.0239698	±	0.0164517	0.0239698	±	0.0308937	0.0239698	±	0.0247496	0.0196117	±	0.0172959	0.0261489	±	0.0196117	0.0239698	±	0.0199716	0.0217908	±	0.0136083	0.00653723	±	0.00653723	0.0326861	±
OTU745	Chloroflexi	Anaerolineae	Anaerolineales	Anaerolineaceae	Anaerolineaceae_unclassified	0.028328	±	0.0136083	0.00871631	±	0.00377427	0.0305071	±	0.0247496	0.0174326	±	0.00998578	0.0348652	±	0.0210143	0.0196117	±	0.0172959	0.0196117	±	0.0196117	0.0130745	±	0.0130745	0.0196117	±	0	0.0217908	±	0.0136083	0.0130745	±	0.0113228	0.0305071	±	0.0164517	0.0261489	±	0.0196117	0.0174326	±	0.0301942	0.0130745	±
OTU2651	Actinobacteria	Actinobacteria	Actinomycetales	Pseudonocardiaceae	Crossiella	0.0871631	±	0.0308937	0.0719095	±	0.0196117	0.0588351	±	0.0397644	0.102417	±	0.123575	0.00435815	±	0.00377427	0.0152535	±	0.0210143	0.0196117	±	0.0113228	0.00217908	±	0.00377427	0.0108954	±	0.0136083	0.0108954	±	0.0136083	0.0174326	±	0.00998578	0.00435815	±	0.00754854	0.00435815	±	0.00754854	0.0414025	±	0.0661306	0	±
OTU1300	Actinobacteria	Actinobacteria	Gaiellales	Gaiellaceae	Gaiella	0.0261489	±	0.0172959	0.0152535	±	0.00377427	0.0196117	±	0.0113228	0.0305071	±	0.0136083	0.0196117	±	0.0130745	0.0174326	±	0.0136083	0.0457606	±	0.0326861	0.028328	±	0.0164517	0.0152535	±	0.0136083	0.0174326	±	0.0136083	0.00871631	±	0.00998578	0.0130745	±	2.12459e-18	0.0130745	±	0.0130745	0.00871631	±	0.00998578	0.0130745	±
OTU1165	Firmicutes	Clostridia	Clostridiales	Ruminococcaceae	Clostridium_III	0.0196117	±	0.0130745	0.028328	±	0.00998578	0.0196117	±	0.00653723	0.0108954	±	0.00377427	0.0152535	±	0.00998578	0.0196117	±	0.0130745	0.0130745	±	0.00653723	0.0174326	±	0.0247496	0.028328	±	0.0164517	0.0130745	±	0.0113228	0.0305071	±	0.0164517	0.0108954	±	0.00754854	0.0239698	±	0.0308937	0.0261489	±	0.0261489	0.0217908	±
OTU3331	Bacteria_unclassified	Bacteria_unclassified	Bacteria_unclassified	Bacteria_unclassified	Bacteria_unclassified	0.0239698	±	0.0188714	0.0196117	±	0.0172959	0.0174326	±	0.0136083	0.0305071	±	0.0199716	0.0217908	±	0.00998578	0.0326861	±	0.0130745	0.0196117	±	0.0196117	0.0261489	±	0.0196117	0.0130745	±	0.0113228	0.0239698	±	0.0164517	0.0305071	±	0.00998578	0.0305071	±	0.00754854	0.00435815	±	0.00754854	0.0392234	±	0.0235703	0.0261489	±
OTU1610	Firmicutes	Bacilli	Bacillales	Alicyclobacillaceae	Tumebacillus	0.0108954	±	0.00754854	0.028328	±	0.00754854	0.0239698	±	0.00754854	0.0326861	±	0.0284951	0.0261489	±	0.0113228	0.0653723	±	0.0623612	0.0217908	±	0.0272167	0.0108954	±	0.00754854	0.00653723	±	0.00653723	0.0348652	±	0.0136083	0.0217908	±	0.022958	0.0196117	±	0.0113228	0.00217908	±	0.00377427	0.0239698	±	0.00998578	0.0196117	±
OTU494	Verrucomicrobia	Subdivision3	Subdivision3_unclassified	Subdivision3_unclassified	Subdivision3_unclassified	0.028328	±	0.0199716	0.0392234	±	0.0113228	0.0348652	±	0.0164517	0.0196117	±	0.00653723	0.0305071	±	0.00754854	0.0261489	±	0.0172959	0.0130745	±	0.0172959	0.0174326	±	0.00998578	0.0217908	±	0.0210143	0.0326861	±	0.0130745	0.0174326	±	0.00998578	0.0152535	±	0.00377427	0.00653723	±	0.0113228	0.0152535	±	0.00377427	0.0370443	±
OTU882	Proteobacteria	Betaproteobacteria	Rhodocyclales	Rhodocyclaceae	Azoarcus	0.0130745	±	0.0130745	0.0130745	±	0.0172959	0.00871631	±	0.00754854	0.0130745	±	0.00653723	0.0501188	±	0.029478	0.056656	±	0.0383047	0.0631932	±	0.0199716	0.0435815	±	0.0199716	0.00217908	±	0.00377427	0.0414025	±	0.0507776	0.0174326	±	0.00754854	0.0174326	±	0.0199716	0.0108954	±	0.00754854	0.00653723	±	0.00653723	0.0217908	±
OTU2096	Acidobacteria	Acidobacteria_Gp6	Gp6	Gp6_unclassified	Gp6_unclassified	0.0152535	±	0.0136083	0.0196117	±	0.0113228	0.0130745	±	0.0226456	0.0174326	±	0.00754854	0.0196117	±	0.0113228	0.0217908	±	0.0136083	0.0392234	±	0.0172959	0.0174326	±	0.0164517	0.0239698	±	0.0164517	0.0174326	±	0.00998578	0.0239698	±	0.022958	0.0261489	±	0.00653723	0.0174326	±	0.0150971	0.0174326	±	0.00998578	0.00435815	±
OTU844	Proteobacteria	Deltaproteobacteria	Myxococcales	Myxococcales_unclassified	Myxococcales_unclassified	0.00653723	±	0.00653723	0.0152535	±	0.0210143	0.0130745	±	2.12459e-18	0.0239698	±	0.022958	0.0217908	±	0.00998578	0.0261489	±	0.0113228	0.0522978	±	0.0130745	0.0239698	±	0.0136083	0.0326861	±	0.0284951	0.028328	±	0.0164517	0.0435815	±	0.0301942	0.0130745	±	0.0130745	0.0130745	±	0.00653723	0.00653723	±	0.00653723	0.0196117	±
OTU1083	Acidobacteria	Acidobacteria_Gp6	Gp6	Gp6_unclassified	Gp6_unclassified	0.0108954	±	0.00754854	0.0130745	±	0.0113228	0.0108954	±	0.00754854	0.0217908	±	0.00998578	0.0261489	±	0.0299573	0.00435815	±	0.00377427	0.0348652	±	0.0150971	0.00871631	±	0.00754854	0.028328	±	0.00377427	0.0217908	±	0.0210143	0.028328	±	0.043527	0.028328	±	0.00377427	0.0217908	±	0.0272167	0.0152535	±	0.0136083	0.0261489	±
OTU1792	Bacteria_unclassified	Bacteria_unclassified	Bacteria_unclassified	Bacteria_unclassified	Bacteria_unclassified	0.0261489	±	0.0226456	0.0305071	±	0.0264199	0.0392234	±	0.0172959	0.0174326	±	0.00998578	0.0152535	±	0.00377427	0.0152535	±	0.0264199	0.0196117	±	0.0130745	0.0130745	±	0.0130745	0.0217908	±	0.00998578	0.028328	±	0.022958	0.0196117	±	0.0172959	0.0217908	±	0.0136083	0.0217908	±	0.0164517	0.0217908	±	0.022958	0.0130745	±
OTU891	Acidobacteria	Acidobacteria_Gp1	Candidatus_Koribacter	Candidatus_Koribacter_unclassified	Candidatus_Koribacter_unclassified	0.0130745	±	0.00653723	0.0239698	±	0.00754854	0.0305071	±	0.00998578	0.0239698	±	0.022958	0.0610141	±	0.0603883	0.0435815	±	0.00754854	0.0152535	±	0.0164517	0.0196117	±	0.0130745	0.0305071	±	0.0308937	0.0326861	±	0.0172959	0.0326861	±	0.0261489	0	±	0	0.0196117	±	0.0113228	0.0239698	±	0.0199716	0.0130745	±
OTU622	Planctomycetes	Planctomycetia	Planctomycetales	Planctomycetaceae	Planctomycetaceae_unclassified	0.0152535	±	0.00998578	0.0196117	±	0.00653723	0.0130745	±	0.0130745	0.0239698	±	0.00998578	0.00435815	±	0.00754854	0.0305071	±	0.00998578	0.0108954	±	0.0188714	0.0108954	±	0.0136083	0.0152535	±	0.00754854	0.0501188	±	0.0272167	0.0305071	±	0.00998578	0.0261489	±	0.0196117	0.0239698	±	0.0150971	0.0239698	±	0.00998578	0.028328	±
OTU740	Proteobacteria	Alphaproteobacteria	Rhizobiales	Rhizobiaceae	Rhizobium	0.0152535	±	0.0264199	0	±	0	0.0108954	±	0.0136083	0.00435815	±	0.00377427	0.0152535	±	0.0210143	0.00435815	±	0.00754854	0.00653723	±	1.0623e-18	0.00871631	±	0.00998578	0.0152535	±	0.0150971	0.00653723	±	1.0623e-18	0.00217908	±	0.00377427	0.00217908	±	0.00377427	0.00871631	±	0.00998578	0.0108954	±	0.0136083	0.0152535	±
OTU651	Bacteria_unclassified	Bacteria_unclassified	Bacteria_unclassified	Bacteria_unclassified	Bacteria_unclassified	0.00653723	±	0.0113228	0.00871631	±	0.00998578	0.0152535	±	0.0164517	0.00871631	±	0.00754854	0.0130745	±	0.0172959	0.0152535	±	0.0264199	0.0217908	±	0.0164517	0.00435815	±	0.00377427	0.00871631	±	0.00998578	0.0348652	±	0.0164517	0.0610141	±	0.0532426	0.00653723	±	0.00653723	0.0370443	±	0.0481867	0.0108954	±	0.0188714	0.0522978	±
OTU506	Actinobacteria	Actinobacteria	Actinomycetales	Pseudonocardiaceae	Pseudonocardiaceae_unclassified	0.00653723	±	1.0623e-18	0	±	0	0	±	0	0.00653723	±	0.00653723	0.00217908	±	0.00377427	0	±	0	0	±	0	0.00217908	±	0.00377427	0	±	0	0.00653723	±	0.00653723	0	±	0	0	±	0	0	±	0	0.00653723	±	0.0113228	0	±
OTU414	Bacteria_unclassified	Bacteria_unclassified	Bacteria_unclassified	Bacteria_unclassified	Bacteria_unclassified	0.0108954	±	0.0136083	0.0217908	±	0.00998578	0.0326861	±	0.0130745	0.0174326	±	0.0136083	0.0239698	±	0.0264199	0.0217908	±	0.0210143	0.0130745	±	0.0130745	0.0108954	±	0.0136083	0.0370443	±	0.0164517	0.0631932	±	0.0247496	0.00435815	±	0.00754854	0.0217908	±	0.00377427	0.0261489	±	0.0172959	0.0152535	±	0.0150971	0.0196117	±
OTU509	Gemmatimonadetes	Gemmatimonadetes	Gemmatimonadales	Gemmatimonadaceae	Gemmatimonas	0.0740886	±	0.0264199	0.0435815	±	0.0164517	0.0392234	±	0.0299573	0.0610141	±	0.029478	0.0108954	±	0.00754854	0.0174326	±	0.00377427	0.0130745	±	0.0172959	0.00871631	±	0.00998578	0.00435815	±	0.00754854	0.0217908	±	0.0210143	0.0152535	±	0.00998578	0.0152535	±	0.00998578	0.00871631	±	0.00377427	0.0130745	±	0.0113228	0.00653723	±
OTU515	Chloroflexi	Anaerolineae	Anaerolineales	Anaerolineaceae	Anaerolineaceae_unclassified	0.0108954	±	0.0136083	0.00435815	±	0.00377427	0.0414025	±	0.00377427	0.00871631	±	0.00377427	0.0152535	±	0.00377427	0.0261489	±	0.0284951	0.0196117	±	0.0196117	0.0217908	±	0.0136083	0.0392234	±	0.0130745	0.0435815	±	0.0247496	0.00871631	±	0.00998578	0.0174326	±	0.0136083	0.0174326	±	0.00754854	0.028328	±	0.0136083	0.0152535	±
OTU1497	Proteobacteria	Deltaproteobacteria	Myxococcales	Kofleriaceae	Kofleria	0.0261489	±	0.0113228	0.0108954	±	0.00377427	0.0348652	±	0.0247496	0.0152535	±	0.00998578	0.0196117	±	0.0235703	0.0152535	±	0.0136083	0.0174326	±	0.00754854	0.0152535	±	0.00998578	0.0239698	±	0.0136083	0.0305071	±	0.0150971	0.0152535	±	0.00998578	0.0130745	±	0.0226456	0.0174326	±	0.00754854	0.0196117	±	0.00653723	0.0174326	±
OTU3339	Bacteroidetes	Sphingobacteriia	Sphingobacteriales	Saprospiraceae	Saprospiraceae_unclassified	0.0239698	±	0.00754854	0.0196117	±	0.0172959	0.0174326	±	0.0136083	0.0108954	±	0.0136083	0.0174326	±	0.00998578	0.0261489	±	0.0235703	0.0108954	±	0.00998578	0.00435815	±	0.00754854	0.0152535	±	0.00998578	0.0108954	±	0.0136083	0.0196117	±	0.0172959	0.0196117	±	0.00653723	0.00871631	±	0.00377427	0.0196117	±	0.0172959	0.0217908	±
OTU463	Proteobacteria	Betaproteobacteria	Burkholderiales	Burkholderiaceae	Lautropia	0.0217908	±	0.00377427	0.0108954	±	0.00377427	0.0261489	±	0.0113228	0.0305071	±	0.0136083	0.00871631	±	0.00998578	0.0370443	±	0.0420285	0.0217908	±	0.022958	0.0370443	±	0.00754854	0.0108954	±	0.00754854	0.0152535	±	0.0210143	0.0174326	±	0.00754854	0.00653723	±	0.00653723	0.0196117	±	0.0130745	0.00435815	±	0.00754854	0.0217908	±
OTU15077	Bacteria_unclassified	Bacteria_unclassified	Bacteria_unclassified	Bacteria_unclassified	Bacteria_unclassified	0.0174326	±	0.0247496	0.0130745	±	0.00653723	0.0217908	±	0.00998578	0.0326861	±	0.0172959	0.0108954	±	0.0136083	0.0152535	±	0.00998578	0.0239698	±	0.00377427	0.0239698	±	0.0360043	0.0130745	±	0.00653723	0.0152535	±	0.00377427	0.0130745	±	0.00653723	0.0174326	±	0.0188714	0.0108954	±	0.0136083	0.00435815	±	0.00754854	0.0326861	±
OTU441	Gemmatimonadetes	Gemmatimonadetes	Gemmatimonadales	Gemmatimonadaceae	Gemmatimonas	0.0305071	±	0.0210143	0.0239698	±	0.0164517	0.0392234	±	0.0235703	0.0239698	±	0.0264199	0.0196117	±	0.0226456	0.0152535	±	0.00754854	0.0108954	±	0.00998578	0.0108954	±	0.0136083	0.0152535	±	0.0136083	0.0217908	±	0.0322474	0.00435815	±	0.00377427	0.0174326	±	0.0150971	0.0217908	±	0.00998578	0.0174326	±	0.0247496	0.0261489	±
OTU554	Gemmatimonadetes	Gemmatimonadetes	Gemmatimonadales	Gemmatimonadaceae	Gemmatimonas	0.0305071	±	0.00754854	0.0501188	±	0.022958	0.028328	±	0.0322474	0.0915212	±	0.0915212	0.0174326	±	0.0164517	0.00653723	±	0.0113228	0.0130745	±	0.0172959	0.0217908	±	0.00998578	0.028328	±	0.0199716	0.0130745	±	0.00653723	0.0108954	±	0.00998578	0.0239698	±	0.0199716	0.00871631	±	0.00998578	0.0196117	±	0.00653723	0.0108954	±
OTU409	Bacteroidetes	Cytophagia	Cytophagales	Ohtaekwangia	Ohtaekwangia_unclassified	0.00435815	±	0.00377427	0	±	0	0.00435815	±	0.00377427	0.00653723	±	0.00653723	0.0196117	±	0.0172959	0.0261489	±	0.0113228	0.0326861	±	0.0284951	0.0261489	±	0.00653723	0.0370443	±	0.0264199	0.0174326	±	0.0150971	0.0348652	±	0.0150971	0.028328	±	0.0247496	0.0174326	±	0.00754854	0.0326861	±	0.0113228	0.0196117	±
OTU640	Bacteria_unclassified	Bacteria_unclassified	Bacteria_unclassified	Bacteria_unclassified	Bacteria_unclassified	0.0348652	±	0.0264199	0.0217908	±	0.00998578	0.0152535	±	0.0136083	0.0217908	±	0.0136083	0.0108954	±	0.00377427	0.0239698	±	0.0136083	0.0174326	±	0.0247496	0.0108954	±	0.00754854	0.0108954	±	0.00998578	0.028328	±	0.00998578	0.0239698	±	0.0210143	0.0435815	±	0.0264199	0.0174326	±	0.0150971	0.00653723	±	0.00653723	0.00871631	±
OTU715	Verrucomicrobia	Spartobacteria	Spartobacteria_unclassified	Spartobacteria_unclassified	Spartobacteria_unclassified	0.00217908	±	0.00377427	0.00435815	±	0.00754854	0	±	0	0.00435815	±	0.00377427	0	±	0	0.00217908	±	0.00377427	0	±	0	0.00217908	±	0.00377427	0.00871631	±	0.0150971	0.00871631	±	0.00998578	0	±	0	0.0130745	±	0.00653723	0.0217908	±	0.0136083	0.00217908	±	0.00377427	0.0130745	±
OTU453	Planctomycetes	Planctomycetia	Planctomycetales	Planctomycetaceae	Planctomycetaceae_unclassified	0.00871631	±	0.00377427	0.00871631	±	0.00998578	0.00871631	±	0.00377427	0.0130745	±	0.0113228	0.0108954	±	0.00998578	0.0239698	±	0.0164517	0.0130745	±	0.0113228	0.0479397	±	0.022958	0.0152535	±	0.0136083	0.0174326	±	0.0247496	0.0239698	±	0.0264199	0.0392234	±	0.0235703	0.0217908	±	0.0136083	0.0174326	±	0.00998578	0.0239698	±
OTU1264	Planctomycetes	Planctomycetia	Planctomycetales	Planctomycetaceae	Planctomycetaceae_unclassified	0.0130745	±	0.0226456	0.0261489	±	0.0235703	0.028328	±	0.0210143	0.0108954	±	0.00377427	0.0196117	±	0.0113228	0.0196117	±	0.0130745	0.0217908	±	0.0164517	0.0239698	±	0.0136083	0.0130745	±	0.00653723	0.0392234	±	0.0284951	0.0217908	±	0.00998578	0.0305071	±	0.0199716	0.0108954	±	0.00754854	0.0196117	±	0.0226456	0.0261489	±
OTU14349	Actinobacteria	Actinobacteria	Actinomycetales	Micrococcaceae	Micrococcaceae_unclassified	0.0174326	±	0.0247496	0.0239698	±	0.00998578	0.0326861	±	0.0130745	0.0305071	±	0.00754854	0.0108954	±	0.00998578	0.00871631	±	0.00754854	0.0174326	±	0.0199716	0.0305071	±	0.0210143	0.0217908	±	0.0164517	0.00653723	±	0.00653723	0.00871631	±	0.00998578	0.0196117	±	0.0172959	0.0174326	±	0.00377427	0.0196117	±	0.0113228	0.0414025	±
OTU14005	Proteobacteria	Betaproteobacteria	Burkholderiales	Comamonadaceae	Variovorax	0.00653723	±	1.0623e-18	0.0108954	±	0.0136083	0.00653723	±	0.00653723	0	±	0	0.00653723	±	0.00653723	0.00435815	±	0.00754854	0.0130745	±	0.0130745	0.00871631	±	0.00377427	0.00217908	±	0.00377427	0.00217908	±	0.00377427	0.0130745	±	0.0130745	0	±	0	0.0196117	±	0.0172959	0.0152535	±	0.0150971	0.0196117	±
OTU539	Proteobacteria	Alphaproteobacteria	Rhodobacterales	Rhodobacteraceae	Rhodobacter	0.00217908	±	0.00377427	0.00435815	±	0.00754854	0.00435815	±	0.00377427	0	±	0	0.00653723	±	0.00653723	0.00217908	±	0.00377427	0.00653723	±	0.00653723	0.00217908	±	0.00377427	0.00435815	±	0.00754854	0.00435815	±	0.00377427	0.0174326	±	0.0247496	0.0392234	±	0.0392234	0.0239698	±	0.0210143	0.0239698	±	0.0360043	0.0457606	±
OTU457	Planctomycetes	Planctomycetia	Planctomycetales	Planctomycetaceae	Planctomycetaceae_unclassified	0.00871631	±	0.00998578	0.0305071	±	0.0308937	0.0152535	±	0.00754854	0.0305071	±	0.00998578	0.00871631	±	0.00998578	0.00871631	±	0.00377427	0.0130745	±	0.0130745	0.0130745	±	0.0113228	0.00871631	±	0.00754854	0.0174326	±	0.0164517	0.0196117	±	0.00653723	0.028328	±	0.00377427	0.0239698	±	0.00998578	0.0108954	±	0.0136083	0.0217908	±
OTU437	Planctomycetes	Planctomycetia	Planctomycetales	Planctomycetaceae	Zavarzinella	0.0217908	±	0.0164517	0.00653723	±	1.0623e-18	0.0174326	±	0.00377427	0.0108954	±	0.0188714	0.00653723	±	0.00653723	0.0152535	±	0.0210143	0.0261489	±	0.0226456	0.0196117	±	0.0172959	0.0217908	±	0.00998578	0.0326861	±	0.00653723	0.0174326	±	0.0136083	0.0217908	±	0.00998578	0.0217908	±	0.0150971	0.00653723	±	0.00653723	0.0174326	±
OTU878	Acidobacteria	Acidobacteria_Gp10	Gp10	Gp10_unclassified	Gp10_unclassified	0.0174326	±	0.0164517	0.028328	±	0.00998578	0.0174326	±	0.00754854	0.00653723	±	1.0623e-18	0.0174326	±	0.0301942	0.0217908	±	0.00754854	0.0130745	±	0.0226456	0.0108954	±	0.00998578	0.0152535	±	0.0150971	0.0414025	±	0.0490655	0.0326861	±	0.0113228	0.0130745	±	0.0130745	0.0305071	±	0.029478	0.00653723	±	0.0113228	0.0152535	±
OTU1105	Acidobacteria	Acidobacteria_Gp7	Gp7	Gp7_unclassified	Gp7_unclassified	0.00653723	±	0.00653723	0.0305071	±	0.0199716	0.0130745	±	0.00653723	0.0174326	±	0.00998578	0.0152535	±	0.00998578	0.0196117	±	0.0113228	0.0152535	±	0.00998578	0.0174326	±	0.0301942	0.0239698	±	0.0150971	0.0326861	±	0.0299573	0.0370443	±	0.0199716	0.0217908	±	0.00998578	0.0305071	±	0.00754854	0.0196117	±	0.0172959	0.0108954	±
OTU974	Proteobacteria	Betaproteobacteria	Gallionellales	Gallionellaceae	Sideroxydans	0.0653723	±	0.0864794	0.0261489	±	0.0113228	0.0544769	±	0.0607411	0.00653723	±	0.00653723	0.00871631	±	0.00754854	0.028328	±	0.00998578	0.0196117	±	0.0284951	0.00653723	±	0.00653723	0.00871631	±	0.00377427	0.056656	±	0.0628164	0.0152535	±	0.0164517	0.0174326	±	0.0164517	0.00435815	±	0.00754854	0.00653723	±	0.0113228	0.00871631	±
OTU584	Proteobacteria	Alphaproteobacteria	Rhodospirillales	Rhodospirillaceae	Rhodospirillaceae_unclassified	0.028328	±	0.0199716	0.0239698	±	0.0301942	0.0348652	±	0.00754854	0.0305071	±	0.00754854	0.0152535	±	0.00377427	0.0130745	±	0.0172959	0.00871631	±	0.00998578	0.0261489	±	0.0397644	0.0370443	±	0.022958	0.0370443	±	0.0360043	0.0174326	±	0.0136083	0.0174326	±	0.00754854	0.00653723	±	0.00653723	0.0174326	±	0.0150971	0.0130745	±
OTU493	Planctomycetes	Planctomycetia	Planctomycetales	Planctomycetaceae	Planctomycetaceae_unclassified	0.00653723	±	0.00653723	0.00871631	±	0.00754854	0.0239698	±	0.00998578	0.0108954	±	0.00377427	0.0108954	±	0.00754854	0.0108954	±	0.00998578	0.0108954	±	0.00998578	0.0108954	±	0.00998578	0.0239698	±	0.0247496	0.0174326	±	0.0136083	0.028328	±	0.0164517	0.0130745	±	0.00653723	0.028328	±	0.0164517	0.0174326	±	0.00377427	0.0326861	±
OTU489	Bacteria_unclassified	Bacteria_unclassified	Bacteria_unclassified	Bacteria_unclassified	Bacteria_unclassified	0.0174326	±	0.0199716	0.00435815	±	0.00754854	0.0174326	±	0.00754854	0.0239698	±	0.0308937	0.00871631	±	0.0150971	0.0108954	±	0.00754854	0.0196117	±	0.0113228	0.0130745	±	0.0130745	0.0261489	±	0.0196117	0.0174326	±	0.0136083	0.0152535	±	0.0136083	0.0392234	±	0.00653723	0.0108954	±	0.00998578	0.0326861	±	0.0113228	0.0239698	±
OTU861	Planctomycetes	Planctomycetia	Planctomycetales	Planctomycetaceae	Planctomycetaceae_unclassified	0.00217908	±	0.00377427	0	±	0	0	±	0	0	±	0	0.00217908	±	0.00377427	0.00217908	±	0.00377427	0.0261489	±	0.0345918	0.00435815	±	0.00754854	0.0457606	±	0.0457606	0.00435815	±	0.00754854	0.0174326	±	0.0136083	0.0152535	±	0.00998578	0.0152535	±	0.00377427	0.0152535	±	0.00754854	0.0217908	±
OTU439	Proteobacteria	Deltaproteobacteria	Bdellovibrionales	Bdellovibrionaceae	Bdellovibrio	0.00435815	±	0.00754854	0	±	0	0	±	0	0	±	0	0.00435815	±	0.00754854	0.0152535	±	0.0136083	0.0130745	±	0.0226456	0.00217908	±	0.00377427	0.0196117	±	0.0172959	0.0108954	±	0.00377427	0.0108954	±	0.00998578	0.00435815	±	0.00754854	0.0719095	±	0.0905825	0.0217908	±	0.0164517	0.0196117	±
OTU853	Proteobacteria	Alphaproteobacteria	Rhizobiales	Rhizobiales_unclassified	Rhizobiales_unclassified	0.00871631	±	0.00998578	0.0196117	±	0.0113228	0.0174326	±	0.00998578	0.0174326	±	0.00998578	0.0196117	±	0.0172959	0.0196117	±	0.0113228	0.028328	±	0.0188714	0.0196117	±	0.0113228	0.0196117	±	0.0196117	0.0130745	±	0.0130745	0.00871631	±	0.00998578	0.00871631	±	0.00998578	0.0108954	±	0.00998578	0.0261489	±	0.0345918	0.0217908	±
OTU532	Proteobacteria	Alphaproteobacteria	Rhodospirillales	Elioraea	Elioraea_unclassified	0.028328	±	0.00998578	0.0196117	±	0.0130745	0.0196117	±	0.0113228	0.0261489	±	0.0113228	0.00653723	±	0.0113228	0.0174326	±	0.00754854	0.00435815	±	0.00754854	0.00653723	±	0.00653723	0.0217908	±	0.0210143	0.0392234	±	0.0172959	0.0196117	±	0.0226456	0.0348652	±	0.0164517	0.0152535	±	0.00754854	0.0217908	±	0.0199716	0.0174326	±
OTU658	Actinobacteria	Actinobacteria	Actinomycetales	Promicromonosporaceae	Promicromonospora	0.00217908	±	0.00377427	0.0370443	±	0.0272167	0.0348652	±	0.0383047	0.0326861	±	0.0397644	0.0174326	±	0.0301942	0.0152535	±	0.0164517	0.0305071	±	0.022958	0.00653723	±	0.00653723	0.0261489	±	0.0345918	0	±	0	0.0174326	±	0.0301942	0.0108954	±	0.00377427	0.0675514	±	0.083034	0.00435815	±	0.00754854	0.0152535	±
OTU617	Acidobacteria	Acidobacteria_Gp6	Gp6	Gp6_unclassified	Gp6_unclassified	0.0479397	±	0.0264199	0.0217908	±	0.0136083	0.0261489	±	0.00653723	0.0174326	±	0.00998578	0.0196117	±	0	0.00653723	±	0.00653723	0.0261489	±	0.00653723	0.0305071	±	0.0301942	0.0261489	±	0.0196117	0.0174326	±	0.00754854	0.00871631	±	0.00998578	0.0370443	±	0.0420285	0.0152535	±	0.00998578	0.0305071	±	0.00754854	0.0414025	±
OTU388	Proteobacteria	Alphaproteobacteria	Rhizobiales	Phyllobacteriaceae	Phyllobacteriaceae_unclassified	0.0130745	±	0.00653723	0.0239698	±	0.0360043	0.0130745	±	2.12459e-18	0.0130745	±	0.00653723	0.0348652	±	0.0150971	0.0217908	±	0.0150971	0.0108954	±	0.00754854	0.0392234	±	0.00653723	0.0152535	±	0.0136083	0.00653723	±	0.00653723	0.0130745	±	0.00653723	0.0414025	±	0.0164517	0.0108954	±	0.00998578	0.00871631	±	0.00377427	0.0108954	±
OTU1025	Proteobacteria	Alphaproteobacteria	Rhodospirillales	Rhodospirillaceae	Dongia	0.0217908	±	0.0199716	0.0108954	±	0.0136083	0.0261489	±	0.0261489	0.0174326	±	0.00998578	0.0130745	±	0.00653723	0.00653723	±	0.00653723	0.0196117	±	0.0196117	0.00435815	±	0.00754854	0.0174326	±	0.0136083	0.0174326	±	0.00377427	0.0348652	±	0.043527	0.00653723	±	0.00653723	0.0152535	±	0.00754854	0.0217908	±	0.00377427	0.0435815	±
OTU1347	Proteobacteria	Deltaproteobacteria	Myxococcales	Myxococcales_unclassified	Myxococcales_unclassified	0.0130745	±	0.0172959	0.028328	±	0.0210143	0.00871631	±	0.00998578	0.0174326	±	0.00998578	0.0217908	±	0.0136083	0.0108954	±	0.00998578	0.0174326	±	0.00998578	0.0217908	±	0.0264199	0.028328	±	0.0335465	0.0217908	±	0.0136083	0.0239698	±	0.0136083	0.0196117	±	0.0130745	0.00435815	±	0.00377427	0.0152535	±	0.0164517	0.028328	±
OTU1010	Firmicutes	Bacilli	Bacillales	Paenibacillaceae_1	Paenibacillus	0.0392234	±	0.0235703	0.0217908	±	0.0136083	0.0108954	±	0.00377427	0.0130745	±	0.0130745	0.0130745	±	0.00653723	0.0174326	±	0.0136083	0.0108954	±	0.00377427	0.028328	±	0.0199716	0.0392234	±	0.0130745	0.0174326	±	0.0199716	0.0305071	±	0.022958	0.0305071	±	0.0371723	0.00871631	±	0.00754854	0.0108954	±	0.00377427	0.0196117	±
OTU1081	Planctomycetes	Planctomycetia	Planctomycetales	Planctomycetaceae	Planctomycetaceae_unclassified	0.0130745	±	0.0113228	0.0305071	±	0.0164517	0.0196117	±	0.0235703	0.0217908	±	0.00754854	0.0108954	±	0.00377427	0.0217908	±	0.0164517	0.0130745	±	0.00653723	0.0130745	±	0.0113228	0.0261489	±	0.0172959	0.0305071	±	0.0247496	0.0370443	±	0.0150971	0.00435815	±	0.00754854	0.0217908	±	0.0199716	0.0196117	±	0.0113228	0.0479397	±
OTU450	Planctomycetes	Planctomycetia	Planctomycetales	Planctomycetaceae	Planctomycetaceae_unclassified	0.0305071	±	0.0136083	0.0261489	±	0.0172959	0.0174326	±	0.00377427	0.0326861	±	0.0172959	0.0152535	±	0.00998578	0.0174326	±	0.00998578	0.0130745	±	0.0226456	0.0130745	±	0.0172959	0.0174326	±	0.0136083	0.0152535	±	0.0164517	0.0370443	±	0.0136083	0.0217908	±	0.00998578	0.00871631	±	0.00998578	0.0130745	±	0.0113228	0.0130745	±
OTU807	Verrucomicrobia	Subdivision3	Subdivision3_unclassified	Subdivision3_unclassified	Subdivision3_unclassified	0.0108954	±	0.0136083	0.0435815	±	0.0301942	0.028328	±	0.00998578	0.0174326	±	0.00998578	0.0130745	±	0.0172959	0.00871631	±	0.00998578	0.028328	±	0.029478	0.0130745	±	0.00653723	0.0239698	±	0.0150971	0.0414025	±	0.043527	0.0108954	±	0.00754854	0.0130745	±	0.0226456	0	±	0	0.00435815	±	0.00754854	0.0130745	±
OTU669	Bacteroidetes	Sphingobacteriia	Sphingobacteriales	Chitinophagaceae	Chitinophagaceae_unclassified	0.00871631	±	0.00998578	0.0305071	±	0.0371723	0.0152535	±	0.0164517	0.00871631	±	0.00377427	0.00871631	±	0.0150971	0.0305071	±	0.0247496	0.0217908	±	0.0199716	0.0326861	±	0.00653723	0.0261489	±	0.0130745	0.00871631	±	0.00998578	0.0174326	±	0.00377427	0.0217908	±	0.00377427	0.0152535	±	0.0264199	0.0196117	±	0.0284951	0.0130745	±
OTU678	Acidobacteria	Acidobacteria_Gp6	Gp6	Gp6_unclassified	Gp6_unclassified	0.0457606	±	0.0261489	0.0239698	±	0.00377427	0.0414025	±	0.022958	0.0392234	±	0.0284951	0.0196117	±	0.0226456	0.0305071	±	0.0199716	0.0130745	±	0.0113228	0.0108954	±	0.00754854	0.0217908	±	0.00377427	0.0239698	±	0.0199716	0.00653723	±	0.0113228	0.0196117	±	0.0172959	0.00435815	±	0.00377427	0.0305071	±	0.0164517	0.0152535	±
OTU1563	Actinobacteria	Actinobacteria	Acidimicrobiales	Acidimicrobiaceae	Ilumatobacter	0.0348652	±	0.0264199	0.0196117	±	0.0172959	0.0326861	±	0.0226456	0.028328	±	0.00998578	0.0152535	±	0.00377427	0.0174326	±	0.00998578	0.0152535	±	0.00754854	0.028328	±	0.00998578	0.0217908	±	0.0199716	0.0108954	±	0.00998578	0.0239698	±	0.00377427	0.00435815	±	0.00377427	0.00435815	±	0.00754854	0.0108954	±	0.00377427	0.0261489	±
OTU546	Gemmatimonadetes	Gemmatimonadetes	Gemmatimonadales	Gemmatimonadaceae	Gemmatimonas	0.0501188	±	0.0308937	0.0414025	±	0.00377427	0.0305071	±	0.0150971	0.028328	±	0.0199716	0.0130745	±	0.0113228	0.0370443	±	0.0301942	0.0217908	±	0.0136083	0.0217908	±	0.0322474	0.0196117	±	0.0226456	0.0239698	±	0.0188714	0.0217908	±	0.0136083	0.00871631	±	0.00998578	0.0108954	±	0.00998578	0.00435815	±	0.00377427	0.0130745	±
OTU518	Proteobacteria	Deltaproteobacteria	Desulfobacterales	Desulfobulbaceae	Desulfoprunum	0.0326861	±	0.0113228	0.0196117	±	0.0235703	0.0457606	±	0.049355	0.0217908	±	0.00754854	0.00871631	±	0.00754854	0.0108954	±	0.00754854	0.028328	±	0.0264199	0.0108954	±	0.00998578	0.00217908	±	0.00377427	0.0610141	±	0.0603883	0.0152535	±	0.00998578	0.00217908	±	0.00377427	0	±	0	0.00653723	±	0.00653723	0.0130745	±
OTU729	Verrucomicrobia	Subdivision3	Subdivision3_unclassified	Subdivision3_unclassified	Subdivision3_unclassified	0.0348652	±	0.022958	0.0152535	±	0.00377427	0.0522978	±	0.0172959	0.0108954	±	0.00377427	0.00871631	±	0.00754854	0.0152535	±	0.00998578	0.0130745	±	0.0172959	0.0108954	±	0.00998578	0.0130745	±	2.12459e-18	0.0544769	±	0.0247496	0.0130745	±	0.0113228	0.0152535	±	0.0164517	0.0152535	±	0.0136083	0.0196117	±	0.0113228	0.00871631	±
OTU778	Proteobacteria	Betaproteobacteria	Rhodocyclales	Rhodocyclaceae	Rhodocyclaceae_unclassified	0.028328	±	0.0272167	0.0217908	±	0.0210143	0.0479397	±	0.0272167	0.0501188	±	0.0210143	0.0305071	±	0.0164517	0.0457606	±	0.00653723	0.0108954	±	0.0136083	0.0130745	±	0.0172959	0.0196117	±	0.0113228	0.0675514	±	0.0264199	0.0217908	±	0.0136083	0.0392234	±	0.0566141	0	±	0	0.0152535	±	0.0210143	0.0108954	±
OTU544	Acidobacteria	Acidobacteria_Gp6	Gp6	Gp6_unclassified	Gp6_unclassified	0.0348652	±	0.0199716	0.0196117	±	0.0196117	0.0261489	±	0.00653723	0.0130745	±	0.0172959	0.00871631	±	0.00377427	0.0217908	±	0.0210143	0.0239698	±	0.00998578	0.0108954	±	0.00998578	0.0196117	±	0.00653723	0.0392234	±	0.0172959	0.0217908	±	0.0136083	0.0261489	±	0.0113228	0.0239698	±	0.00998578	0.0152535	±	0.0210143	0.0130745	±
OTU13975	Bacteria_unclassified	Bacteria_unclassified	Bacteria_unclassified	Bacteria_unclassified	Bacteria_unclassified	0.0196117	±	0.0130745	0.0174326	±	0.00998578	0.028328	±	0.00377427	0.00653723	±	0.00653723	0.0196117	±	0.00653723	0.0239698	±	0.0164517	0.0196117	±	0.0113228	0.0108954	±	0.0136083	0.0152535	±	0.00754854	0.0108954	±	0.00998578	0.0261489	±	0.0172959	0.0370443	±	0.043527	0.00435815	±	0.00754854	0.00653723	±	0.00653723	0.028328	±
OTU451	Planctomycetes	Planctomycetia	Planctomycetales	Planctomycetaceae	Planctomycetaceae_unclassified	0.0108954	±	0.00998578	0.00871631	±	0.00377427	0.0217908	±	0.00754854	0.0130745	±	0.0113228	0.00653723	±	1.0623e-18	0.0305071	±	0.0472915	0.0261489	±	0.0113228	0.0261489	±	0.0113228	0.0130745	±	0.0113228	0.0217908	±	0.0136083	0.0239698	±	0.0210143	0.028328	±	0.022958	0.0196117	±	0.0113228	0.0196117	±	0.0130745	0.0239698	±
OTU11573	Actinobacteria	Actinobacteria	Actinomycetales	Streptomycetaceae	Streptomyces	0.0152535	±	0.0136083	0.00653723	±	0.0113228	0.0108954	±	0.00998578	0.0239698	±	0.0136083	0.028328	±	0.0150971	0.0348652	±	0.0247496	0.0261489	±	0.0130745	0.0217908	±	0.00754854	0.0239698	±	0.0210143	0.0130745	±	0.0130745	0.0239698	±	0.00377427	0.00871631	±	0.00998578	0.0196117	±	0.0226456	0.0239698	±	0.0247496	0.028328	±
OTU663	Chloroflexi	Chloroflexia	Kallotenuales	Kallotenuaceae	Kallotenue	0.0305071	±	0.0247496	0.0152535	±	0.00998578	0.0414025	±	0.00998578	0.0348652	±	0.0210143	0.0239698	±	0.0360043	0.00435815	±	0.00377427	0.0152535	±	0.0210143	0.0326861	±	0.0130745	0.00653723	±	0.00653723	0.00871631	±	0.0150971	0.0174326	±	0.0199716	0.00653723	±	0.00653723	0.00217908	±	0.00377427	0.0152535	±	0.0164517	0.0196117	±
OTU2863	Actinobacteria	Actinobacteria	Gaiellales	Gaiellaceae	Gaiella	0.0348652	±	0.0264199	0.0414025	±	0.0247496	0.0261489	±	0.00653723	0.0370443	±	0.0210143	0.0217908	±	0.0136083	0.0130745	±	0.0113228	0.0108954	±	0.0136083	0.0174326	±	0.00998578	0.028328	±	0.0335465	0.0130745	±	0.00653723	0.028328	±	0.0136083	0.00435815	±	0.00754854	0.0217908	±	0.00377427	0.0108954	±	0.00998578	0.0108954	±
OTU1518	Proteobacteria	Deltaproteobacteria	Myxococcales	Kofleriaceae	Kofleria	0.0217908	±	0.0150971	0.028328	±	0.029478	0.00653723	±	1.0623e-18	0.0239698	±	0.0136083	0.0196117	±	0.00653723	0.0174326	±	0.0164517	0.0108954	±	0.0188714	0.0261489	±	0.0130745	0.0217908	±	0.022958	0.0261489	±	0.0172959	0.0261489	±	0.0226456	0.0152535	±	0.00754854	0.0152535	±	0.00998578	0.0261489	±	0.0113228	0.0152535	±
OTU593	Chloroflexi	Chloroflexi_unclassified	Chloroflexi_unclassified	Chloroflexi_unclassified	Chloroflexi_unclassified	0.0174326	±	0.00998578	0.0196117	±	0.0130745	0.0392234	±	0.0130745	0.028328	±	0.0136083	0.0239698	±	0.0247496	0.0130745	±	0.00653723	0.0152535	±	0.0136083	0.0174326	±	0.00377427	0.0152535	±	0.00998578	0.0261489	±	0.0113228	0.0108954	±	0.0136083	0.0239698	±	0.022958	0.0130745	±	0.0130745	0.0217908	±	0.0150971	0.0108954	±
OTU464	Latescibacteria	Latescibacteria_unclassified	Latescibacteria_unclassified	Latescibacteria_unclassified	Latescibacteria_unclassified	0.0152535	±	0.00998578	0.00435815	±	0.00377427	0.0239698	±	0.0264199	0.0130745	±	0.0172959	0.0174326	±	0.0199716	0.0174326	±	0.0164517	0.0174326	±	0.0247496	0.028328	±	0.0164517	0.0108954	±	0.0188714	0.0217908	±	0.0164517	0.0196117	±	0.0196117	0.0414025	±	0.0494991	0.0217908	±	0.0164517	0.0174326	±	0.00754854	0.0196117	±
OTU3473	Firmicutes	Bacilli	Bacillales	Bacillaceae_1	Bacillus	0.0261489	±	0.0130745	0.0196117	±	0.00653723	0.028328	±	0.0150971	0.0152535	±	0.0164517	0.0261489	±	0.0130745	0.0217908	±	0.0164517	0.0152535	±	0.00377427	0.0174326	±	0.00754854	0.0174326	±	0.00377427	0.0130745	±	2.12459e-18	0.0217908	±	0.00998578	0.0196117	±	0.00653723	0.0130745	±	0.00653723	0.0174326	±	0.0150971	0.00871631	±
OTU1256	Proteobacteria	Deltaproteobacteria	Myxococcales	Cystobacteraceae	Anaeromyxobacter	0.0196117	±	0.00653723	0.0261489	±	0.0345918	0.0217908	±	0.00754854	0.0305071	±	0.00377427	0.0261489	±	4.24919e-18	0.0348652	±	0.00998578	0.0239698	±	0.0136083	0.0174326	±	0.0164517	0.0217908	±	0.00377427	0.0239698	±	0.00998578	0.0130745	±	0.0113228	0.0305071	±	0.00998578	0.0305071	±	0.029478	0.0152535	±	0.0136083	0.0130745	±
OTU802	Chloroflexi	Caldilineae	Caldilineales	Caldilineaceae	Litorilinea	0.0326861	±	0.0113228	0.0348652	±	0.0199716	0.0392234	±	0.0172959	0.0152535	±	0.00998578	0.0174326	±	0.00998578	0.00653723	±	0.00653723	0.0217908	±	0.022958	0.028328	±	0.0136083	0.0152535	±	0.00377427	0	±	0	0.0130745	±	0.0130745	0.00653723	±	1.0623e-18	0.0174326	±	0.0136083	0.0152535	±	0.0150971	0.00653723	±
OTU1054	Firmicutes	Bacilli	Bacillales	Planococcaceae	Rummeliibacillus	0.0261489	±	0.0113228	0.00653723	±	0.00653723	0.0152535	±	0.0164517	0.0239698	±	0.0210143	0.0130745	±	0.00653723	0.028328	±	0.029478	0.0217908	±	0.00998578	0.0348652	±	0.0136083	0.0326861	±	0.0345918	0.0239698	±	0.0136083	0.0108954	±	0.00377427	0.0305071	±	0.0264199	0.00871631	±	0.00998578	0.00871631	±	0.00754854	0.0261489	±
OTU672	Planctomycetes	Planctomycetia	Planctomycetales	Planctomycetaceae	Planctomycetaceae_unclassified	0.0152535	±	0.00998578	0.0217908	±	0.0136083	0.00871631	±	0.00998578	0.0152535	±	0.0136083	0.0108954	±	0.00377427	0.0239698	±	0.00998578	0.00435815	±	0.00754854	0.0217908	±	0.0210143	0.0152535	±	0.00377427	0.0152535	±	0.00377427	0.0196117	±	0.0284951	0.028328	±	0.0136083	0.0108954	±	0.0136083	0.00217908	±	0.00377427	0.00653723	±
OTU1172	Proteobacteria	Alphaproteobacteria	Rhizobiales	Rhizobiales_unclassified	Rhizobiales_unclassified	0.00871631	±	0.00377427	0.0261489	±	0.0130745	0.0196117	±	0.0172959	0.0239698	±	0.00377427	0.00435815	±	0.00377427	0.00871631	±	0.00998578	0.0108954	±	0.00377427	0.00435815	±	0.00377427	0.0196117	±	0.00653723	0.0196117	±	0.0235703	0.0239698	±	0.0308937	0.0108954	±	0.0136083	0.0261489	±	0.0299573	0.0196117	±	0.0130745	0.0370443	±
OTU748	Chloroflexi	Caldilineae	Caldilineales	Caldilineaceae	Litorilinea	0.0239698	±	0.022958	0.0174326	±	0.00377427	0.0239698	±	0.0150971	0.0174326	±	0.00377427	0.0305071	±	0.022958	0.0305071	±	0.00998578	0.0130745	±	0.0113228	0.0174326	±	0.0136083	0.0326861	±	0.0130745	0.028328	±	0.0164517	0.0217908	±	0.00998578	0.0108954	±	0.00754854	0.0152535	±	0.0136083	0.00435815	±	0.00377427	0.0130745	±
OTU7124	Bacteria_unclassified	Bacteria_unclassified	Bacteria_unclassified	Bacteria_unclassified	Bacteria_unclassified	0.0348652	±	0.0272167	0.0196117	±	0.0172959	0.0261489	±	0.0113228	0.0261489	±	0.0113228	0.0217908	±	0.0164517	0.0239698	±	0.022958	0.0174326	±	0.0199716	0.0130745	±	0.0130745	0.00871631	±	0.00998578	0.0108954	±	0.0136083	0.00653723	±	0.00653723	0.0130745	±	0.0172959	0.0326861	±	0.0235703	0.0152535	±	0.0136083	0.0108954	±
OTU620	Firmicutes	Firmicutes_unclassified	Firmicutes_unclassified	Firmicutes_unclassified	Firmicutes_unclassified	0	±	0	0	±	0	0.00217908	±	0.00377427	0	±	0	0.0370443	±	0.0472915	0.0261489	±	0.0130745	0.0522978	±	0.0196117	0.0501188	±	0.0532426	0.0239698	±	0.0264199	0.0108954	±	0.0136083	0.0326861	±	0.0299573	0.0108954	±	0.0188714	0.0130745	±	0.00653723	0.0152535	±	0.0164517	0.0174326	±
OTU367	Microgenomates	Microgenomates_unclassified	Microgenomates_unclassified	Microgenomates_unclassified	Microgenomates_unclassified	0	±	0	0	±	0	0	±	0	0	±	0	0	±	0	0	±	0	0	±	0	0	±	0	0.00217908	±	0.00377427	0.00871631	±	0.0150971	0.0305071	±	0.0264199	0.0130745	±	0.0172959	0.00653723	±	0.00653723	0.00653723	±	0.00653723	0.0457606	±
OTU570	Acidobacteria	Acidobacteria_Gp10	Gp10	Gp10_unclassified	Gp10_unclassified	0.00435815	±	0.00754854	0.0108954	±	0.00377427	0.00217908	±	0.00377427	0.0174326	±	0.0136083	0.0305071	±	0.0472915	0.0130745	±	0.0113228	0.0196117	±	0.0113228	0.00217908	±	0.00377427	0.00871631	±	0.00377427	0.0522978	±	0.0428675	0.0610141	±	0.0621323	0.0130745	±	0.00653723	0.0130745	±	0.0172959	0.0108954	±	0.0136083	0.0479397	±
OTU1661	Planctomycetes	Planctomycetia	Planctomycetales	Planctomycetaceae	Aquisphaera	0.00871631	±	0.00754854	0.0217908	±	0.00998578	0.0130745	±	0.00653723	0.0108954	±	0.00998578	0.0239698	±	0.0136083	0.00653723	±	0.00653723	0.0239698	±	0.0199716	0.0326861	±	0.0457606	0.0130745	±	0.0113228	0.0196117	±	0.00653723	0.0261489	±	0.0172959	0.0217908	±	0.00998578	0.028328	±	0.00998578	0.00871631	±	0.00998578	0.0174326	±
OTU1008	Chloroflexi	Thermomicrobia	Sphaerobacterales	Sphaerobacteraceae	Sphaerobacteraceae_unclassified	0.0326861	±	0.0113228	0.0435815	±	0.0164517	0.0217908	±	0.00998578	0.0130745	±	0.00653723	0.028328	±	0.00998578	0.0239698	±	0.0136083	0.0196117	±	0.00653723	0.0174326	±	0.0164517	0.0152535	±	0.00998578	0.0174326	±	0.0150971	0.0152535	±	0.00998578	0.0108954	±	0.00998578	0.0108954	±	0.0136083	0.0152535	±	0.0136083	0.0217908	±
OTU958	Firmicutes	Clostridia	Clostridiales	Heliobacteriaceae	Hydrogenispora	0.0152535	±	0.0164517	0.0217908	±	0.0164517	0.0108954	±	0.00754854	0.0152535	±	0.00998578	0.0108954	±	0.00998578	0.028328	±	0.0322474	0.0152535	±	0.0210143	0.00871631	±	0.00998578	0.0435815	±	0.0210143	0.0370443	±	0.0164517	0.0152535	±	0.00998578	0.0108954	±	0.00377427	0.0239698	±	0.0150971	0.0239698	±	0.0247496	0.00653723	±
OTU1041	Bacteroidetes	Cytophagia	Cytophagales	Chryseolinea	Chryseolinea_unclassified	0.0108954	±	0.00754854	0.00435815	±	0.00754854	0.0239698	±	0.0136083	0.00653723	±	0.00653723	0.0152535	±	0.00998578	0.0196117	±	0.00653723	0.0196117	±	0.00653723	0.0108954	±	0.0136083	0.028328	±	0.0188714	0.0174326	±	0.0136083	0.028328	±	0.043527	0.0108954	±	0.00754854	0.0196117	±	0.0172959	0.0501188	±	0.0360043	0.0414025	±
OTU988	Proteobacteria	Alphaproteobacteria	Sneathiellales	Sneathiellaceae	Ferrovibrio	0.00217908	±	0.00377427	0.00435815	±	0.00754854	0.00653723	±	1.0623e-18	0.00435815	±	0.00754854	0.0435815	±	0.0188714	0.028328	±	0.0164517	0.0392234	±	0.0130745	0.0152535	±	0.0164517	0.0196117	±	0.0196117	0.00653723	±	0.00653723	0.0152535	±	0.00998578	0.0305071	±	0.0360043	0.0196117	±	0.0196117	0.0217908	±	0.0136083	0.0196117	±
OTU1145	Acidobacteria	Acidobacteria_Gp6	Gp6	Gp6_unclassified	Gp6_unclassified	0.0239698	±	0.00377427	0.0457606	±	0.0113228	0.0544769	±	0.0150971	0.0457606	±	0.0339684	0.00871631	±	0.0150971	0.0196117	±	0.0172959	0.0196117	±	0.0172959	0.0196117	±	0.0113228	0.0392234	±	0.0428675	0.0130745	±	0.0226456	0.0130745	±	0.0226456	0.0152535	±	0.0136083	0.0130745	±	0.0226456	0.0130745	±	0.0113228	0.00653723	±
OTU674	Proteobacteria	Deltaproteobacteria	Myxococcales	Haliangiaceae	Haliangium	0.0326861	±	0.0345918	0.0348652	±	0.00754854	0.0261489	±	0.0172959	0.0305071	±	0.0308937	0.0217908	±	0.00377427	0.0326861	±	0.0299573	0.028328	±	0.043527	0.0130745	±	0.00653723	0.0152535	±	0.00998578	0.0217908	±	0.0150971	0.00435815	±	0.00754854	0.0392234	±	0.0392234	0.00217908	±	0.00377427	0.0152535	±	0.0136083	0.0174326	±
OTU697	Proteobacteria	Gammaproteobacteria	Gammaproteobacteria_unclassified	Gammaproteobacteria_unclassified	Gammaproteobacteria_unclassified	0.00435815	±	0.00377427	0.0130745	±	0.0172959	0.0108954	±	0.00754854	0.00653723	±	0.00653723	0.0130745	±	0.0130745	0.00217908	±	0.00377427	0.00217908	±	0.00377427	0.0108954	±	0.00998578	0.0370443	±	0.00998578	0.0479397	±	0.0603883	0.0457606	±	0.040825	0.0174326	±	0.0164517	0.0130745	±	0.00653723	0.0152535	±	0.00998578	0.00871631	±
OTU11697	Actinobacteria	Actinobacteria	Acidimicrobiales	Acidimicrobiales_unclassified	Acidimicrobiales_unclassified	0.0174326	±	0.0199716	0.00435815	±	0.00754854	0.00435815	±	0.00377427	0.00653723	±	0.00653723	0.0196117	±	0.0113228	0.0174326	±	0.00998578	0.0196117	±	0.00653723	0.0196117	±	0.0113228	0.0217908	±	0.0136083	0.0174326	±	0.00754854	0.0196117	±	0.0130745	0.0239698	±	0.0247496	0.0305071	±	0.0150971	0.0217908	±	0.022958	0.0370443	±
OTU789	Proteobacteria	Alphaproteobacteria	Rhizobiales	Xanthobacteraceae	Ancylobacter	0.00435815	±	0.00754854	0.00217908	±	0.00377427	0.00217908	±	0.00377427	0.00217908	±	0.00377427	0.0108954	±	0.00998578	0.0174326	±	0.0199716	0.0152535	±	0.0136083	0.0152535	±	0.0136083	0.028328	±	0.00377427	0.0152535	±	0.00998578	0.0217908	±	0.00754854	0.0261489	±	0.0452913	0.0130745	±	0.00653723	0.0348652	±	0.0322474	0.0217908	±
OTU1277	Chloroflexi	Chloroflexia	Kallotenuales	Kallotenuaceae	Kallotenue	0.0261489	±	0.0345918	0.0174326	±	0.0150971	0.0479397	±	0.0308937	0.0217908	±	0.00754854	0.00653723	±	0.00653723	0.0305071	±	0.00998578	0.00653723	±	0.00653723	0.0130745	±	0.0113228	0.0239698	±	0.0136083	0.0108954	±	0.0136083	0.00871631	±	0.0150971	0.0196117	±	0.0172959	0.0174326	±	0.00998578	0.00871631	±	0.0150971	0.00435815	±
OTU1317	Actinobacteria	Actinobacteria	Actinomycetales	Nocardioidaceae	Nocardioides	0.028328	±	0.0272167	0.0305071	±	0.0136083	0.0348652	±	0.0272167	0.0370443	±	0.0136083	0.0108954	±	0.00998578	0.00871631	±	0.00754854	0.0130745	±	0.00653723	0.0130745	±	0.00653723	0.0174326	±	0.00754854	0.0108954	±	0.0188714	0.00435815	±	0.00754854	0.0108954	±	0.00998578	0.0196117	±	0.0172959	0	±	0	0.00871631	±
OTU514	Bacteria_unclassified	Bacteria_unclassified	Bacteria_unclassified	Bacteria_unclassified	Bacteria_unclassified	0.0108954	±	0.0136083	0.0196117	±	0.0130745	0.0261489	±	0.0130745	0.0239698	±	0.0308937	0.0130745	±	0.0172959	0.0217908	±	0.0136083	0.00871631	±	0.00754854	0.0130745	±	0.00653723	0.0130745	±	0.0172959	0.0130745	±	0.0113228	0.0174326	±	0.0136083	0.0326861	±	0.0196117	0.00653723	±	0.00653723	0.00871631	±	0.0150971	0.0217908	±
OTU811	Bacteria_unclassified	Bacteria_unclassified	Bacteria_unclassified	Bacteria_unclassified	Bacteria_unclassified	0.0108954	±	0.00377427	0.0152535	±	0.0164517	0.0217908	±	0.0199716	0.0261489	±	0.00653723	0.0108954	±	0.0136083	0.0435815	±	0.00998578	0.0305071	±	0.0199716	0.0217908	±	0.00377427	0.0326861	±	0.0172959	0.0130745	±	0.0113228	0.0196117	±	0.00653723	0.00435815	±	0.00377427	0.0108954	±	0.00754854	0.0174326	±	0.0164517	0.0174326	±
OTU949	Proteobacteria	Deltaproteobacteria	Myxococcales	Polyangiaceae	Minicystis	0.0261489	±	0.0113228	0.0108954	±	0.00754854	0.0196117	±	0.0172959	0.0108954	±	0.00998578	0.0217908	±	0.0322474	0.0261489	±	0.0235703	0.0370443	±	0.0199716	0.00653723	±	0.00653723	0.0108954	±	0.0136083	0.0239698	±	0.0264199	0.0196117	±	0.0113228	0.0152535	±	0.00998578	0.00871631	±	0.00998578	0.0130745	±	0.0172959	0.028328	±
OTU488	Proteobacteria	Gammaproteobacteria	Xanthomonadales	Xanthomonadaceae	Lysobacter	0	±	0	0	±	0	0.00435815	±	0.00754854	0	±	0	0.0305071	±	0.0371723	0.0108954	±	0.00998578	0.0326861	±	0.0196117	0.0108954	±	0.0136083	0.0196117	±	0.0130745	0.0152535	±	0.0210143	0.00871631	±	0.0150971	0.0305071	±	0.0210143	0.0196117	±	0.0284951	0.0174326	±	0.0301942	0.056656	±
OTU635	Nitrospirae	Nitrospira	Nitrospirales	Nitrospiraceae	Nitrospira	0.0174326	±	0.00377427	0.0239698	±	0.0360043	0.0152535	±	0.0264199	0.0305071	±	0.0188714	0.0217908	±	0.00377427	0.0174326	±	0.0199716	0.0261489	±	0.0339684	0.0305071	±	0.0188714	0.0152535	±	0.0136083	0.0130745	±	0.0113228	0.0196117	±	0.0172959	0.0174326	±	0.0150971	0.0326861	±	0.0299573	0.0130745	±	0.0130745	0.0174326	±
OTU1022	Firmicutes	Clostridia	Clostridiales	Heliobacteriaceae	Hydrogenispora	0.0239698	±	0.0136083	0.00871631	±	0.00998578	0.00653723	±	0.00653723	0.0130745	±	0.0172959	0.0326861	±	0	0.0217908	±	0.0150971	0.00871631	±	0.00754854	0.0108954	±	0.00754854	0.0196117	±	0.00653723	0.0414025	±	0.0210143	0.0130745	±	0.0113228	0.0174326	±	0.00998578	0.00871631	±	0.00754854	0.0108954	±	0.0136083	0.0130745	±
OTU707	Actinobacteria	Actinobacteria	Acidimicrobiales	Acidimicrobiaceae	Ilumatobacter	0.0152535	±	0.00998578	0.0196117	±	0.0172959	0.0130745	±	2.12459e-18	0.0152535	±	0.00998578	0.0174326	±	0.0136083	0.00871631	±	0.00998578	0.0196117	±	0.0172959	0.0196117	±	0.0113228	0.0196117	±	0.0196117	0.00217908	±	0.00377427	0.00653723	±	1.0623e-18	0.0261489	±	0.0130745	0.00653723	±	0.0113228	0.00435815	±	0.00754854	0.0261489	±
OTU1111	Proteobacteria	Deltaproteobacteria	Deltaproteobacteria_unclassified	Deltaproteobacteria_unclassified	Deltaproteobacteria_unclassified	0.0239698	±	0.00377427	0.0305071	±	0.0136083	0.0196117	±	0.00653723	0.0239698	±	0.0150971	0.00435815	±	0.00377427	0.00653723	±	1.0623e-18	0.00435815	±	0.00377427	0.0130745	±	0.0113228	0.0130745	±	0.00653723	0.0326861	±	0.0172959	0.0152535	±	0.0136083	0.0152535	±	0.0136083	0.0130745	±	0.0113228	0.0196117	±	0.0196117	0.00871631	±
OTU711	Actinobacteria	Actinobacteria_unclassified	Actinobacteria_unclassified	Actinobacteria_unclassified	Actinobacteria_unclassified	0.0217908	±	0.0164517	0.0174326	±	0.00998578	0.028328	±	0.00754854	0.0130745	±	0.0113228	0.0196117	±	0.0113228	0.0217908	±	0.0164517	0.0196117	±	0.0113228	0.0305071	±	0.00998578	0.0130745	±	0.00653723	0.0130745	±	0.0172959	0.0174326	±	0.00754854	0.0130745	±	0.0130745	0.00653723	±	0.0113228	0.0196117	±	0	0.0217908	±
OTU9608	Firmicutes	Clostridia	Clostridiales	Clostridiaceae_1	Clostridium_sensu_stricto	0.028328	±	0.0247496	0.0261489	±	0.0284951	0.0217908	±	0.00754854	0.0239698	±	0.022958	0.0108954	±	0.00377427	0.0108954	±	0.00377427	0.0174326	±	0.0164517	0.00653723	±	0.00653723	0.0174326	±	0.0136083	0.0196117	±	0.0113228	0.0261489	±	0.0345918	0.0348652	±	0.0210143	0.0152535	±	0.00754854	0.0196117	±	0.0226456	0.0108954	±
OTU833	Proteobacteria	Gammaproteobacteria	Xanthomonadales	Sinobacteraceae	Povalibacter	0.0217908	±	0.00754854	0.0152535	±	0.0136083	0.0196117	±	0.00653723	0.00871631	±	0.00998578	0.0435815	±	0.0264199	0.0239698	±	0.00998578	0.0392234	±	0.0130745	0.0261489	±	0.0196117	0.0196117	±	0.0130745	0.0130745	±	0.00653723	0.0217908	±	0.0188714	0.0152535	±	0.00998578	0.0130745	±	0.00653723	0.0196117	±	0.0284951	0.028328	±
OTU831	Planctomycetes	Planctomycetia	Planctomycetales	Planctomycetaceae	Planctomycetaceae_unclassified	0.0130745	±	0.0226456	0.0130745	±	0.0130745	0.028328	±	0.0164517	0.0152535	±	0.0150971	0.0174326	±	0.0136083	0.00435815	±	0.00377427	0.00871631	±	0.00998578	0.0130745	±	0.0113228	0.0174326	±	0.0136083	0.0130745	±	0.00653723	0.0108954	±	0.00998578	0.0348652	±	0.0150971	0.00217908	±	0.00377427	0.0174326	±	0.00998578	0.0152535	±
OTU481	Proteobacteria	Deltaproteobacteria	Myxococcales	Myxococcales_unclassified	Myxococcales_unclassified	0	±	0	0	±	0	0	±	0	0	±	0	0.0239698	±	0.0164517	0.0348652	±	0.0136083	0.0479397	±	0.0164517	0.0457606	±	0.040825	0.0522978	±	0.084984	0.0501188	±	0.0136083	0.0305071	±	0.00754854	0	±	0	0.0152535	±	0.0264199	0.028328	±	0.0150971	0	±
OTU693	Bacteria_unclassified	Bacteria_unclassified	Bacteria_unclassified	Bacteria_unclassified	Bacteria_unclassified	0.0130745	±	0.00653723	0.0326861	±	0.0226456	0.0414025	±	0.0247496	0.0348652	±	0.0383047	0.00435815	±	0.00377427	0.00653723	±	0.0113228	0.0217908	±	0.0199716	0.0217908	±	0.0322474	0.00871631	±	0.0150971	0.00217908	±	0.00377427	0.0305071	±	0.022958	0.0217908	±	0.0199716	0.0261489	±	0.0113228	0.0174326	±	0.0247496	0.0261489	±
OTU1101	Proteobacteria	Deltaproteobacteria	Myxococcales	Myxococcales_unclassified	Myxococcales_unclassified	0.0174326	±	0.0150971	0.0261489	±	0.0130745	0.0174326	±	0.0188714	0.0152535	±	0.00998578	0.0130745	±	0.00653723	0.0152535	±	0.00377427	0.0130745	±	0.00653723	0.0217908	±	0.0264199	0.0174326	±	0.00377427	0.0152535	±	0.00377427	0.00653723	±	1.0623e-18	0.0239698	±	0.0247496	0.0348652	±	0.00377427	0.0174326	±	0.0136083	0.028328	±
OTU639	Chloroflexi	Thermomicrobia	Thermomicrobia_unclassified	Thermomicrobia_unclassified	Thermomicrobia_unclassified	0.0174326	±	0.00754854	0.0305071	±	0.0247496	0.0108954	±	0.00998578	0.0217908	±	0.0136083	0.0152535	±	0.0136083	0.0348652	±	0.0188714	0.0174326	±	0.0136083	0.0305071	±	0.0150971	0.0217908	±	0.0164517	0.00871631	±	0.00754854	0.028328	±	0.00998578	0.0239698	±	0.00998578	0.00653723	±	0.0113228	0.0174326	±	0.0150971	0.0196117	±
OTU1144	Chloroflexi	Thermomicrobia	Thermomicrobia_unclassified	Thermomicrobia_unclassified	Thermomicrobia_unclassified	0.0305071	±	0.00754854	0.0196117	±	0.0113228	0.0130745	±	0.0113228	0.0196117	±	0.0113228	0.0261489	±	0.0113228	0.0305071	±	0.0136083	0.028328	±	0.0335465	0.0414025	±	0.0150971	0.0196117	±	0.0196117	0.0152535	±	0.00998578	0.00653723	±	0.0113228	0.0174326	±	0.0188714	0.0108954	±	0.00998578	0.0130745	±	0.0226456	0.0261489	±
OTU1400	Verrucomicrobia	Subdivision3	Subdivision3_unclassified	Subdivision3_unclassified	Subdivision3_unclassified	0.00653723	±	0.0113228	0.00653723	±	0.0113228	0.00653723	±	0.0113228	0.00435815	±	0.00377427	0.0108954	±	0.0188714	0.0174326	±	0.00998578	0.00871631	±	0.00754854	0.0196117	±	0.0226456	0.0326861	±	0.0172959	0.0174326	±	0.0136083	0.0370443	±	0.0371723	0.0631932	±	0.0371723	0.0261489	±	0.0113228	0.0196117	±	0.0130745	0.00871631	±
OTU5359	Proteobacteria	Betaproteobacteria	Burkholderiales	Comamonadaceae	Hydrogenophaga	0.0152535	±	0.0136083	0.0108954	±	0.0136083	0.00217908	±	0.00377427	0.00653723	±	0.0113228	0.0588351	±	0.0457606	0.0479397	±	0.0136083	0.0675514	±	0.0728933	0.0326861	±	0.0299573	0.0152535	±	0.00754854	0.0174326	±	0.0247496	0.0130745	±	0.0172959	0.00435815	±	0.00377427	0.0108954	±	0.0188714	0.00653723	±	1.0623e-18	0.00435815	±
OTU1033	Planctomycetes	Planctomycetia	Planctomycetales	Planctomycetaceae	Gimesia	0.0108954	±	0.0136083	0.00653723	±	0.00653723	0.0217908	±	0.0199716	0.00871631	±	0.00377427	0.0152535	±	0.0164517	0.0239698	±	0.00754854	0.0130745	±	0.0130745	0.00871631	±	0.00998578	0.0239698	±	0.0136083	0.0108954	±	0.00998578	0.0348652	±	0.0210143	0.0392234	±	0.0113228	0.0108954	±	0.0136083	0.0108954	±	0.00377427	0.00871631	±
OTU655	Proteobacteria	Alphaproteobacteria	Sphingomonadales	Sphingomonadaceae	Rhizorhabdus	0.0108954	±	0.0188714	0.00653723	±	0.0113228	0	±	0	0	±	0	0.0196117	±	0.0172959	0.0152535	±	0.00377427	0.0326861	±	0.0130745	0.0174326	±	0.0199716	0.028328	±	0.0136083	0.0196117	±	0.0172959	0.0305071	±	0.0210143	0.0305071	±	0.0247496	0.0217908	±	0.0136083	0.00653723	±	0.00653723	0.0305071	±
OTU727	Proteobacteria	Deltaproteobacteria	Myxococcales	Cystobacteraceae	Cystobacter	0.028328	±	0.0272167	0	±	0	0.0305071	±	0.00377427	0.028328	±	0.0335465	0.0392234	±	0.0363978	0.00871631	±	0.00754854	0.0305071	±	0.0210143	0.0130745	±	0.0172959	0.0196117	±	0.0284951	0.0152535	±	0.0164517	0.00871631	±	0.0150971	0.0108954	±	0.00998578	0	±	0	0.00653723	±	0.00653723	0.00435815	±
OTU636	Acidobacteria	Acidobacteria_Gp6	Gp6	Gp6_unclassified	Gp6_unclassified	0.00435815	±	0.00754854	0.00871631	±	0.00998578	0.0130745	±	0.0113228	0.00653723	±	1.0623e-18	0.0196117	±	0.00653723	0.0152535	±	0.00754854	0.0326861	±	0.0226456	0.0239698	±	0.00998578	0.0501188	±	0.041517	0.0196117	±	0.0130745	0.0326861	±	0.0196117	0.028328	±	0.00998578	0.0108954	±	0.0136083	0.0261489	±	0.0196117	0.028328	±
OTU1377	Planctomycetes	Planctomycetia	Planctomycetales	Planctomycetaceae	Planctomycetaceae_unclassified	0.00435815	±	0.00754854	0.0130745	±	0.0130745	0.0108954	±	0.00377427	0.00653723	±	0.0113228	0.0239698	±	0.00754854	0.0348652	±	0.0210143	0.00871631	±	0.00998578	0.00871631	±	0.00998578	0.0174326	±	0.00998578	0.0174326	±	0.0164517	0.0261489	±	0.0130745	0.00871631	±	0.00998578	0.00435815	±	0.00754854	0.0196117	±	0.0284951	0.0174326	±
OTU15635	Proteobacteria	Alphaproteobacteria	Rhizobiales	Rhizobiales_unclassified	Rhizobiales_unclassified	0.0174326	±	0.00754854	0.0108954	±	0.00754854	0.0108954	±	0.00754854	0.0152535	±	0.00998578	0.0174326	±	0.0188714	0.0152535	±	0.0150971	0.0130745	±	0.0113228	0.0217908	±	0.0136083	0.0152535	±	0.00377427	0.0305071	±	0.0164517	0.00435815	±	0.00377427	0.00871631	±	0.00998578	0.0217908	±	0.00998578	0.0152535	±	0.00754854	0.0239698	±
OTU578	Actinobacteria	Actinobacteria	Actinomycetales	Nocardiaceae	Nocardia	0.0108954	±	0.00998578	0.028328	±	0.0335465	0.0239698	±	0.00998578	0.0108954	±	0.00998578	0.028328	±	0.0210143	0.0196117	±	0.0235703	0.0217908	±	0.0136083	0.0239698	±	0.0264199	0.0392234	±	0.0235703	0.00653723	±	0.00653723	0.0217908	±	0.0272167	0.0130745	±	0.0113228	0.0217908	±	0.0199716	0.0261489	±	0.0345918	0.0305071	±
OTU479	Firmicutes	Firmicutes_unclassified	Firmicutes_unclassified	Firmicutes_unclassified	Firmicutes_unclassified	0.00217908	±	0.00377427	0.00217908	±	0.00377427	0.0174326	±	0.00754854	0.0108954	±	0.0136083	0.0239698	±	0.0308937	0.0305071	±	0.00377427	0.028328	±	0.0335465	0.028328	±	0.00754854	0.028328	±	0.0210143	0.0174326	±	0.00377427	0.028328	±	0.0188714	0.0414025	±	0.0199716	0.0239698	±	0.0301942	0.00871631	±	0.00377427	0.0217908	±
OTU520	Proteobacteria	Deltaproteobacteria	Myxococcales	Myxococcales_unclassified	Myxococcales_unclassified	0.0239698	±	0.022958	0.0152535	±	0.0164517	0.0239698	±	0.0247496	0.0174326	±	0.0247496	0.0305071	±	0.00754854	0.0196117	±	0.0172959	0.0196117	±	0.0284951	0.0261489	±	0.0172959	0.0108954	±	0.0188714	0.0152535	±	0.0150971	0.0152535	±	0.0150971	0.0261489	±	0.0284951	0.00871631	±	0.00998578	0	±	0	0.0196117	±
OTU475	Bacteria_unclassified	Bacteria_unclassified	Bacteria_unclassified	Bacteria_unclassified	Bacteria_unclassified	0.00217908	±	0.00377427	0.00217908	±	0.00377427	0.00653723	±	0.0113228	0	±	0	0.0196117	±	0.00653723	0.0196117	±	0.0339684	0.00435815	±	0.00754854	0.0217908	±	0.022958	0.0152535	±	0.0150971	0.0196117	±	0.0196117	0.0130745	±	0.00653723	0.0348652	±	0.0264199	0.0108954	±	0.00998578	0.0130745	±	0.0172959	0.0130745	±
OTU990	Firmicutes	Clostridia	Clostridiales	Peptococcaceae_1	Desulfosporosinus	0.00871631	±	0.00998578	0.028328	±	0.0150971	0.0174326	±	0.00754854	0.0348652	±	0.0308937	0.028328	±	0.0210143	0.0326861	±	0.0196117	0.0392234	±	0.0113228	0.0261489	±	0.0235703	0.0130745	±	0.00653723	0.0239698	±	0.00754854	0.0261489	±	0.0172959	0.0174326	±	0.00998578	0.00435815	±	0.00754854	0.0130745	±	0.0113228	0.0239698	±
OTU682	Proteobacteria	Betaproteobacteria	Rhodocyclales	Rhodocyclaceae	Rhodocyclaceae_unclassified	0.00653723	±	0.00653723	0.00653723	±	1.0623e-18	0.0174326	±	0.00377427	0.00653723	±	0.00653723	0.0239698	±	0.0136083	0.0108954	±	0.00377427	0.0108954	±	0.0136083	0.0196117	±	0.0196117	0.0217908	±	0.0150971	0.0261489	±	4.24919e-18	0.0196117	±	0.0196117	0.0108954	±	0.0188714	0.0217908	±	0.0210143	0.0348652	±	0.0308937	0.0326861	±
OTU8807	Acidobacteria	Acidobacteria_Gp3	Gp3	Gp3_unclassified	Gp3_unclassified	0.0174326	±	0.00754854	0.0217908	±	0.00754854	0.0152535	±	0.0136083	0.0217908	±	0.00998578	0.0152535	±	0.00754854	0.0174326	±	0.00377427	0.0108954	±	0.00998578	0.0305071	±	0.0360043	0.0152535	±	0.00754854	0.0239698	±	0.0136083	0.0174326	±	0.00998578	0.0108954	±	0.00754854	0.00871631	±	0.0150971	0.0130745	±	0.0172959	0.00653723	±
OTU482	Chloroflexi	Anaerolineae	Anaerolineales	Anaerolineaceae	Ornatilinea	0.0108954	±	0.0188714	0.00871631	±	0.00998578	0.028328	±	0.0383047	0.00653723	±	0.0113228	0.0174326	±	0.0150971	0.0217908	±	0.00377427	0.0261489	±	0.0345918	0.0174326	±	0.0164517	0.0217908	±	0.0322474	0.0414025	±	0.0210143	0.0174326	±	0.0150971	0.0108954	±	0.0136083	0.0108954	±	0.00377427	0.0348652	±	0.022958	0.0130745	±
OTU948	Actinobacteria	Actinobacteria	Gaiellales	Gaiellaceae	Gaiella	0.0261489	±	0.0113228	0.0152535	±	0.00998578	0.0217908	±	0.0164517	0.0196117	±	0.0113228	0.0217908	±	0.0199716	0.0305071	±	0.0164517	0.0261489	±	0.0172959	0.0130745	±	0.0113228	0.0108954	±	0.0136083	0.0326861	±	0.0339684	0.0108954	±	0.0188714	0.00653723	±	1.0623e-18	0.0108954	±	0.0136083	0.0108954	±	0.00377427	0.0217908	±
OTU889	Proteobacteria	Alphaproteobacteria	Alphaproteobacteria_unclassified	Alphaproteobacteria_unclassified	Alphaproteobacteria_unclassified	0.00653723	±	0.0113228	0.0174326	±	0.0164517	0.00653723	±	0.00653723	0.0152535	±	0.0164517	0.0152535	±	0.0150971	0.0174326	±	0.00754854	0.00653723	±	0.00653723	0.0261489	±	0.00653723	0.0217908	±	0.00998578	0.0152535	±	0.00377427	0.028328	±	0.0199716	0.00871631	±	0.0150971	0.0261489	±	0.0235703	0.0130745	±	0.00653723	0.0239698	±
OTU959	Proteobacteria	Alphaproteobacteria	Rhodospirillales	Rhodospirillaceae	Azospirillum	0.00871631	±	0.00998578	0.00653723	±	0.00653723	0.00653723	±	0.00653723	0	±	0	0.0152535	±	0.0210143	0.0217908	±	0.0377427	0.0239698	±	0.00377427	0.0174326	±	0.0247496	0.0130745	±	0.0172959	0.0610141	±	0.094583	0.0152535	±	0.0210143	0.0217908	±	0.022958	0.0370443	±	0.022958	0.0217908	±	0.0377427	0.00217908	±
OTU5799	Proteobacteria	Deltaproteobacteria	Myxococcales	Kofleriaceae	Kofleria	0.0392234	±	0.0113228	0.0239698	±	0.0247496	0.0326861	±	0.0172959	0.0414025	±	0.0272167	0.0108954	±	0.0188714	0.0217908	±	0.0210143	0.00653723	±	0.00653723	0.00653723	±	0.0113228	0.00653723	±	0.00653723	0.0239698	±	0.0210143	0.00435815	±	0.00754854	0.0130745	±	0.0130745	0.0108954	±	0.0188714	0.00435815	±	0.00754854	0.0196117	±
OTU703	Actinobacteria	Actinobacteria	Gaiellales	Gaiellaceae	Gaiella	0.00435815	±	0.00377427	0.0326861	±	0.0130745	0.0326861	±	0.0172959	0.0130745	±	0.0113228	0.0174326	±	0.00754854	0.0174326	±	0.00998578	0.028328	±	0.00998578	0.0348652	±	0.00998578	0.028328	±	0.0150971	0.0305071	±	0.0164517	0.00871631	±	0.0150971	0.0108954	±	0.00754854	0.0196117	±	0.0172959	0.00217908	±	0.00377427	0.0108954	±
OTU779	Bacteroidetes	Cytophagia	Cytophagales	Ohtaekwangia	Ohtaekwangia_unclassified	0	±	0	0.0108954	±	0.0188714	0	±	0	0	±	0	0.0217908	±	0.00998578	0.0130745	±	0.0172959	0.0108954	±	0.00754854	0.0152535	±	0.00998578	0.0414025	±	0.0188714	0.0261489	±	0.00653723	0.0174326	±	0.00377427	0.00871631	±	0.00998578	0.0305071	±	0.0528398	0.00871631	±	0.00998578	0.0130745	±
OTU490	Verrucomicrobia	Opitutae	Opitutales	Opitutaceae	Opitutus	0.0130745	±	2.12459e-18	0.0326861	±	0.0130745	0.0479397	±	0.0272167	0.0217908	±	0.00377427	0.0130745	±	0.00653723	0.0196117	±	0.0172959	0.0130745	±	0.0226456	0.00653723	±	0.00653723	0.00653723	±	0.00653723	0.0326861	±	0.0284951	0.028328	±	0.0264199	0.0522978	±	0.0172959	0.0196117	±	0.0113228	0.0108954	±	0.00377427	0	±
OTU952	Actinobacteria	Actinobacteria	Acidimicrobiales	Acidimicrobiales_unclassified	Acidimicrobiales_unclassified	0.0174326	±	0.00998578	0.00435815	±	0.00754854	0.0196117	±	0.0113228	0.0196117	±	0.00653723	0.0217908	±	0.0210143	0.0108954	±	0.00754854	0.028328	±	0.00377427	0.0130745	±	0.00653723	0.0108954	±	0.0136083	0.0130745	±	0.0172959	0.0196117	±	0.0196117	0.00871631	±	0.00998578	0.00871631	±	0.00754854	0.00871631	±	0.00754854	0.0370443	±
OTU957	Verrucomicrobia	Spartobacteria	Terrimicrobium	Terrimicrobium_unclassified	Terrimicrobium_unclassified	0	±	0	0.00653723	±	0.0113228	0.00217908	±	0.00377427	0.00435815	±	0.00754854	0.0108954	±	0.00998578	0.0239698	±	0.0264199	0.0152535	±	0.00754854	0.00653723	±	0.00653723	0.00871631	±	0.00998578	0.0108954	±	0.0188714	0.0130745	±	0.00653723	0.0152535	±	0.00998578	0.0174326	±	0.0164517	0.0152535	±	0.00754854	0.0239698	±
OTU634	Proteobacteria	Alphaproteobacteria	Rhizobiales	Hyphomicrobiaceae	Prosthecomicrobium	0.00871631	±	0.00377427	0.00217908	±	0.00377427	0.00871631	±	0.00998578	0.0152535	±	0.0164517	0.0217908	±	0.0164517	0.00871631	±	0.00377427	0.0152535	±	0.0264199	0.0196117	±	0.00653723	0.0196117	±	0.0113228	0.00653723	±	0.00653723	0.0174326	±	0.00998578	0.0239698	±	0.0210143	0.028328	±	0.00377427	0.0174326	±	0.00377427	0	±
OTU562	Proteobacteria	Deltaproteobacteria	Desulfuromonadales	Desulfuromonadaceae	Desulfuromonas	0.0435815	±	0.0322474	0.028328	±	0.00377427	0.0544769	±	0.0394045	0.028328	±	0.0377427	0.0152535	±	0.00377427	0.0217908	±	0.0164517	0.0152535	±	0.0264199	0.0108954	±	0.00998578	0.0152535	±	0.00754854	0.0370443	±	0.0210143	0.0217908	±	0.0164517	0.0174326	±	0.00754854	0.00435815	±	0.00754854	0.00435815	±	0.00377427	0.0108954	±
OTU523	Chloroflexi	Chloroflexi_unclassified	Chloroflexi_unclassified	Chloroflexi_unclassified	Chloroflexi_unclassified	0.0261489	±	0.0113228	0.0174326	±	0.00377427	0.0348652	±	0.0210143	0.00653723	±	0.00653723	0.0217908	±	0.0199716	0.0152535	±	0.00754854	0.00653723	±	0.0113228	0.0130745	±	0.0130745	0.00435815	±	0.00754854	0.00871631	±	0.00754854	0.0196117	±	0.0235703	0.0239698	±	0.00998578	0	±	0	0.0174326	±	0.0164517	0.0130745	±
OTU765	Planctomycetes	Planctomycetia	Planctomycetales	Planctomycetaceae	Planctomycetaceae_unclassified	0.0130745	±	0.0113228	0.00871631	±	0.00998578	0.0196117	±	0.0113228	0.00217908	±	0.00377427	0.00871631	±	0.00377427	0.0217908	±	0.00754854	0.0152535	±	0.0136083	0.0130745	±	0.0172959	0.00653723	±	0.00653723	0.0130745	±	0.0130745	0.0217908	±	0.0272167	0.0239698	±	0.0188714	0.00217908	±	0.00377427	0.028328	±	0.00377427	0.0130745	±
OTU505	Chloroflexi	Chloroflexi_unclassified	Chloroflexi_unclassified	Chloroflexi_unclassified	Chloroflexi_unclassified	0.0196117	±	0.0130745	0.0174326	±	0.0136083	0.0261489	±	0.0339684	0.0196117	±	0.0235703	0.0108954	±	0.00998578	0.0305071	±	0.0188714	0.0152535	±	0.0164517	0.00871631	±	0.00998578	0.0239698	±	0.0164517	0.0414025	±	0.0264199	0.0196117	±	0.0172959	0.00871631	±	0.00754854	0.0130745	±	0.0130745	0.0217908	±	0.022958	0.0261489	±
OTU613	Proteobacteria	Betaproteobacteria	Gallionellales	Gallionellaceae	Gallionellaceae_unclassified	0.0108954	±	0.00377427	0.0130745	±	0.0130745	0.0130745	±	0.00653723	0.196117	±	0.334039	0.00435815	±	0.00754854	0.00217908	±	0.00377427	0	±	0	0.00217908	±	0.00377427	0.00435815	±	0.00754854	0.0522978	±	0.0742487	0.0196117	±	0.0235703	0	±	0	0.00653723	±	0.00653723	0.00217908	±	0.00377427	0.0108954	±
OTU496	Armatimonadetes	Armatimonadetes_gp5	Armatimonadetes_gp5_unclassified	Armatimonadetes_gp5_unclassified	Armatimonadetes_gp5_unclassified	0.00653723	±	0.00653723	0	±	0	0.00217908	±	0.00377427	0.00653723	±	0.0113228	0.0305071	±	0.0272167	0.00435815	±	0.00377427	0.0196117	±	0.0226456	0.028328	±	0.00754854	0.0108954	±	0.00998578	0.0152535	±	0.0136083	0.0305071	±	0.00998578	0.0392234	±	0.0226456	0.0174326	±	0.00998578	0.00435815	±	0.00377427	0.0326861	±
OTU531	Chloroflexi	Thermomicrobia	Thermomicrobia_unclassified	Thermomicrobia_unclassified	Thermomicrobia_unclassified	0.0130745	±	0.0226456	0.0174326	±	0.00754854	0.0196117	±	0.0172959	0.0196117	±	0.0196117	0.028328	±	0.022958	0.0392234	±	0.0130745	0.0108954	±	0.0188714	0.0196117	±	0.0172959	0.0174326	±	0.0188714	0.00653723	±	0.00653723	0.0152535	±	0.00377427	0.0261489	±	0.0172959	0.0108954	±	0.0136083	0.0108954	±	0.00377427	0.00653723	±
OTU1121	Acidobacteria	Acidobacteria_Gp6	Gp6	Gp6_unclassified	Gp6_unclassified	0.0261489	±	0.0226456	0.0239698	±	0.0150971	0.0130745	±	0.00653723	0.0130745	±	0.0113228	0.0239698	±	0.0150971	0.0196117	±	0.0172959	0.0261489	±	0.00653723	0.0174326	±	0.00998578	0.0108954	±	0.00754854	0.0174326	±	0.0136083	0.0196117	±	0	0.00435815	±	0.00754854	0.0130745	±	0.0130745	0.0217908	±	0.0164517	0.0217908	±
OTU758	Acidobacteria	Acidobacteria_Gp3	Gp3	Gp3_unclassified	Gp3_unclassified	0.0108954	±	0.00998578	0.0108954	±	0.00998578	0.0130745	±	0.0130745	0.0305071	±	0.00998578	0.00435815	±	0.00754854	0.0348652	±	0.0272167	0.00871631	±	0.00754854	0.0108954	±	0.00377427	0.0152535	±	0.00754854	0.0239698	±	0.00998578	0.00653723	±	0.00653723	0.028328	±	0.0136083	0.0239698	±	0.0360043	0.0152535	±	0.0136083	0.0239698	±
OTU12507	Proteobacteria	Betaproteobacteria	Burkholderiales	Burkholderiales_incertae_sedis	Burkholderiales_incertae_sedis_unclassified	0	±	0	0	±	0	0	±	0	0	±	0	0	±	0	0.00217908	±	0.00377427	0	±	0	0	±	0	0	±	0	0	±	0	0	±	0	0	±	0	0.00217908	±	0.00377427	0.00435815	±	0.00754854	0.0501188	±
OTU586	Verrucomicrobia	Subdivision3	Subdivision3_unclassified	Subdivision3_unclassified	Subdivision3_unclassified	0.0174326	±	0.0136083	0.0261489	±	0.00653723	0.0544769	±	0.0335465	0.0414025	±	0.0164517	0.00435815	±	0.00754854	0.0239698	±	0.022958	0.00871631	±	0.00998578	0.0196117	±	0.0130745	0.00653723	±	0.00653723	0.0130745	±	0.00653723	0.0108954	±	0.00377427	0.0174326	±	0.0164517	0.00217908	±	0.00377427	0.00217908	±	0.00377427	0.00653723	±
OTU956	Proteobacteria	Deltaproteobacteria	Myxococcales	Kofleriaceae	Kofleria	0.028328	±	0.0164517	0.0348652	±	0.00754854	0.0239698	±	0.00998578	0.0501188	±	0.0272167	0.0130745	±	2.12459e-18	0.00435815	±	0.00377427	0.0130745	±	0.00653723	0.0108954	±	0.00377427	0.0108954	±	0.00754854	0.0261489	±	0.0172959	0.0130745	±	2.12459e-18	0.00871631	±	0.00998578	0.00653723	±	0.00653723	0.0108954	±	0.00998578	0.0108954	±
OTU442	Proteobacteria	Gammaproteobacteria	Legionellales	Coxiellaceae	Aquicella	0.00435815	±	0.00754854	0	±	0	0.00653723	±	0.00653723	0	±	0	0.00871631	±	0.00754854	0.0174326	±	0.0136083	0.0261489	±	0.0130745	0.0152535	±	0.00754854	0.0174326	±	0.0188714	0.0108954	±	0.00377427	0.0457606	±	0.0299573	0.0130745	±	0.00653723	0.0130745	±	2.12459e-18	0.0130745	±	0.0172959	0.0217908	±
OTU4916	Proteobacteria	Alphaproteobacteria	Rhizobiales	Rhizobiales_unclassified	Rhizobiales_unclassified	0.00871631	±	0.00377427	0.0261489	±	0.0172959	0.00871631	±	0.00998578	0.0239698	±	0.00754854	0.0217908	±	0.00998578	0.0217908	±	0.022958	0.0130745	±	0.00653723	0.0261489	±	0.0130745	0.00653723	±	0.00653723	0.0130745	±	0.0130745	0.0130745	±	0.0130745	0.0108954	±	0.0136083	0.0174326	±	0.0164517	0.00871631	±	0.00377427	0.00871631	±
OTU485	Bacteria_unclassified	Bacteria_unclassified	Bacteria_unclassified	Bacteria_unclassified	Bacteria_unclassified	0.0152535	±	0.0164517	0.0196117	±	0.0226456	0.0196117	±	0.0172959	0.0239698	±	0.0301942	0.00435815	±	0.00754854	0.0130745	±	0.0113228	0.0108954	±	0.0136083	0	±	0	0.00653723	±	0.0113228	0.0196117	±	0.0130745	0.0130745	±	0.0172959	0.0196117	±	0.0172959	0.00653723	±	1.0623e-18	0.0370443	±	0.0394045	0.0152535	±
OTU511	Firmicutes	Clostridia	Clostridiales	Clostridiaceae_1	Clostridium_sensu_stricto	0.0261489	±	4.24919e-18	0.0174326	±	0.00998578	0.0108954	±	0.00998578	0.0261489	±	0.0113228	0.0174326	±	0.00377427	0.0174326	±	0.0199716	0.0174326	±	0.00998578	0.0174326	±	0.0136083	0.0239698	±	0.0164517	0.0108954	±	0.00998578	0.0326861	±	0.00653723	0.00871631	±	0.00754854	0.0174326	±	0.00998578	0.00871631	±	0.00377427	0.00871631	±
OTU526	Nitrospirae	Nitrospira	Nitrospirales	Nitrospiraceae	Nitrospira	0.028328	±	0.0188714	0.0370443	±	0.0150971	0.0196117	±	0.0172959	0.0522978	±	0.0535095	0.0108954	±	0.00377427	0.0217908	±	0.0272167	0.0108954	±	0.00998578	0.00871631	±	0.00377427	0.0196117	±	0.0284951	0.028328	±	0.0210143	0.0130745	±	0.0130745	0.0108954	±	0.00754854	0.00871631	±	0.00754854	0.0108954	±	0.00754854	0.0108954	±
OTU871	Bacteria_unclassified	Bacteria_unclassified	Bacteria_unclassified	Bacteria_unclassified	Bacteria_unclassified	0.0108954	±	0.00998578	0.0196117	±	0.0130745	0.0196117	±	0.0172959	0.0130745	±	0.00653723	0.0152535	±	0.00998578	0.00653723	±	1.0623e-18	0.0261489	±	0.00653723	0.0196117	±	0.0172959	0.0217908	±	0.0136083	0.0217908	±	0.00377427	0.0108954	±	0.00377427	0.0108954	±	0.00377427	0.0239698	±	0.0210143	0.00217908	±	0.00377427	0.0261489	±
OTU1442	Actinobacteria	Actinobacteria	Actinomycetales	Micromonosporaceae	Micromonosporaceae_unclassified	0.0196117	±	0.00653723	0.0217908	±	0.00754854	0.0261489	±	4.24919e-18	0.028328	±	0.00754854	0.0174326	±	0.0199716	0.0130745	±	2.12459e-18	0.0217908	±	0.00754854	0.00871631	±	0.00377427	0.0305071	±	0.0136083	0.0152535	±	0.0136083	0.0174326	±	0.00998578	0.0130745	±	0.0113228	0.00653723	±	0.0113228	0.00653723	±	0.00653723	0.0108954	±
OTU687	Proteobacteria	Alphaproteobacteria	Alphaproteobacteria_incertae_sedis	Geminicoccus	Geminicoccus_unclassified	0.0196117	±	0.00653723	0.0130745	±	0.00653723	0.0152535	±	0.00998578	0.0152535	±	0.00998578	0.0108954	±	0.0136083	0.00871631	±	0.00998578	0.0392234	±	0.00653723	0.0196117	±	0.0172959	0.0305071	±	0.00377427	0.00871631	±	0.00754854	0.0108954	±	0.0188714	0.00435815	±	0.00754854	0.0174326	±	0.00754854	0.0152535	±	0.0264199	0.0305071	±
OTU596	Acidobacteria	Acidobacteria_Gp6	Gp6	Gp6_unclassified	Gp6_unclassified	0.0261489	±	0.0196117	0.028328	±	0.00377427	0.0239698	±	0.0136083	0.0130745	±	0.0113228	0.0217908	±	0.0164517	0.0174326	±	0.00754854	0.00435815	±	0.00754854	0.0130745	±	0.0113228	0.0217908	±	0.0322474	0.0239698	±	0.0188714	0.0108954	±	0.00998578	0.00871631	±	0.00754854	0.0217908	±	0.0136083	0.028328	±	0.0264199	0.0196117	±
OTU696	Proteobacteria	Proteobacteria_unclassified	Proteobacteria_unclassified	Proteobacteria_unclassified	Proteobacteria_unclassified	0.0217908	±	0.00377427	0.0326861	±	0.0196117	0.0305071	±	0.0264199	0.0174326	±	0.0136083	0.028328	±	0.0136083	0.028328	±	0.0199716	0.0217908	±	0.0136083	0.0196117	±	0.0226456	0.0108954	±	0.0188714	0.0174326	±	0.00998578	0.0108954	±	0.00754854	0.0130745	±	0.00653723	0.00871631	±	0.00377427	0.028328	±	0.00754854	0.0174326	±
OTU541	Actinobacteria	Actinobacteria	Solirubrobacterales	Conexibacteraceae	Conexibacter	0.0108954	±	0.00377427	0.0239698	±	0.0136083	0.028328	±	0.0150971	0.028328	±	0.00998578	0.028328	±	0.022958	0.0305071	±	0.0210143	0.0196117	±	0.0130745	0.028328	±	0.0164517	0.0217908	±	0.00754854	0.00653723	±	0.00653723	0.00871631	±	0.00998578	0.00435815	±	0.00754854	0.00217908	±	0.00377427	0.0108954	±	0.00377427	0.00217908	±
OTU1657	Acidobacteria	Acidobacteria_Gp3	Gp3	Gp3_unclassified	Gp3_unclassified	0.0174326	±	0.00754854	0.0217908	±	0.0272167	0.0217908	±	0.0150971	0.0174326	±	0.00998578	0.0305071	±	0.0188714	0.00871631	±	0.0150971	0.00653723	±	0.00653723	0.0326861	±	0.0130745	0.0130745	±	0.0113228	0.0130745	±	0.00653723	0.00653723	±	0.00653723	0.00871631	±	0.00377427	0.00217908	±	0.00377427	0.00653723	±	0.00653723	0.0217908	±
OTU1702	Proteobacteria	Alphaproteobacteria	Rhizobiales	Hyphomicrobiaceae	Hyphomicrobium	0.0108954	±	0.00377427	0.0217908	±	0.00377427	0.0239698	±	0.0188714	0.00653723	±	0.00653723	0.028328	±	0.00998578	0.0130745	±	0.0113228	0.00871631	±	0.00377427	0.0130745	±	0.00653723	0.0108954	±	0.00998578	0.0174326	±	0.00377427	0.00653723	±	0.00653723	0.028328	±	0.0188714	0.0196117	±	0.0130745	0.0108954	±	0.0136083	0.00871631	±
OTU726	Planctomycetes	Planctomycetia	Planctomycetales	Planctomycetaceae	Thermogutta	0.0152535	±	0.0164517	0.0305071	±	0.0247496	0.0174326	±	0.0164517	0.0305071	±	0.00754854	0.0174326	±	0.00377427	0.00871631	±	0.00998578	0.0196117	±	0.0172959	0.0108954	±	0.00754854	0.0261489	±	0.0235703	0.00435815	±	0.00754854	0.0152535	±	0.00377427	0.0152535	±	0.0150971	0.0196117	±	0.0113228	0.0108954	±	0.0136083	0.00653723	±
OTU503	Verrucomicrobia	Verrucomicrobiae	Verrucomicrobiales	Verrucomicrobiaceae	Verrucomicrobiaceae_unclassified	0.00653723	±	1.0623e-18	0.00435815	±	0.00754854	0.00653723	±	0.0113228	0.00653723	±	0.0113228	0	±	0	0.00217908	±	0.00377427	0.00871631	±	0.00998578	0	±	0	0.0152535	±	0.0264199	0.00217908	±	0.00377427	0.0130745	±	0.0226456	0.0174326	±	0.00998578	0.00653723	±	0.00653723	0.0174326	±	0.00998578	0.0108954	±
OTU572	Chloroflexi	Chloroflexia	Chloroflexia_unclassified	Chloroflexia_unclassified	Chloroflexia_unclassified	0.0239698	±	0.0247496	0.0196117	±	0.0172959	0.0152535	±	0.00377427	0.00871631	±	0.00754854	0.0130745	±	0.0172959	0.00871631	±	0.00377427	0.0152535	±	0.0210143	0.0217908	±	0.0136083	0.0152535	±	0.0164517	0.0239698	±	0.0136083	0.00871631	±	0.00754854	0.0392234	±	0.0172959	0.00217908	±	0.00377427	0.0108954	±	0.0136083	0.0130745	±
OTU3940	Verrucomicrobia	Verrucomicrobiae	Verrucomicrobiales	Verrucomicrobiaceae	Verrucomicrobium	0.00435815	±	0.00754854	0.00435815	±	0.00377427	0	±	0	0	±	0	0	±	0	0	±	0	0	±	0	0.00217908	±	0.00377427	0.00435815	±	0.00754854	0	±	0	0.00435815	±	0.00754854	0.00435815	±	0.00377427	0.0457606	±	0.0623612	0	±	0	0.00435815	±
OTU3906	Proteobacteria	Alphaproteobacteria	Rhizobiales	Rhizobiales_unclassified	Rhizobiales_unclassified	0.0130745	±	0.0113228	0.00871631	±	0.00754854	0.00653723	±	0.00653723	0.00871631	±	0.00754854	0.00871631	±	0.00754854	0.0152535	±	0.0136083	0.00871631	±	0.00998578	0.0261489	±	0.0299573	0.028328	±	0.00754854	0.0239698	±	0.0210143	0.0305071	±	0.0136083	0.0108954	±	0.00754854	0.0217908	±	0.0136083	0.0130745	±	0.0130745	0.0348652	±
OTU652	Actinobacteria	Actinobacteria	Actinomycetales	Actinomycetales_unclassified	Actinomycetales_unclassified	0.0130745	±	0.00653723	0.00871631	±	0.00754854	0.0108954	±	0.00754854	0.0261489	±	0.0172959	0.0174326	±	0.00754854	0.00871631	±	0.0150971	0.00653723	±	0.00653723	0.0217908	±	0.00377427	0.00871631	±	0.00377427	0.0239698	±	0.00377427	0.0130745	±	0.0172959	0.0152535	±	0.0210143	0.0130745	±	2.12459e-18	0.0130745	±	0.00653723	0.0174326	±
OTU629	Bacteroidetes	Sphingobacteriia	Sphingobacteriales	Chitinophagaceae	Parasegetibacter	0.0239698	±	0.0164517	0.0152535	±	0.0136083	0.0196117	±	0.0130745	0.0217908	±	0.0136083	0.00435815	±	0.00754854	0.00653723	±	1.0623e-18	0.0261489	±	0.0261489	0.0239698	±	0.0247496	0.0108954	±	0.00754854	0.00435815	±	0.00377427	0.0108954	±	0.0136083	0.0108954	±	0.0136083	0.00653723	±	0.00653723	0.0152535	±	0.00377427	0.0261489	±
OTU1216	Firmicutes	Clostridia	Clostridiales	Clostridiaceae_1	Clostridium_sensu_stricto	0.0130745	±	0.00653723	0.00871631	±	0.00998578	0.0239698	±	0.0136083	0.0152535	±	0.00754854	0.0261489	±	0.00653723	0.0392234	±	0.00653723	0.0196117	±	0.0113228	0.0239698	±	0.0199716	0.0196117	±	0.0172959	0.00871631	±	0.00377427	0.0108954	±	0.00377427	0.028328	±	0.00377427	0.00871631	±	0.00998578	0.0217908	±	0.022958	0.0108954	±
OTU953	Actinobacteria	Actinobacteria	Acidimicrobiales	Acidimicrobineae_incertae_sedis	Aciditerrimonas	0.0108954	±	0.0136083	0.0196117	±	0.0196117	0.028328	±	0.0136083	0.0130745	±	0.0113228	0.0196117	±	0.0130745	0.0348652	±	0.0164517	0.0108954	±	0.00998578	0.0239698	±	0.0199716	0.0174326	±	0.0188714	0.0239698	±	0.0164517	0.00653723	±	0.00653723	0.00653723	±	0.00653723	0.0152535	±	0.00998578	0.0130745	±	0.0113228	0.028328	±
OTU751	Proteobacteria	Deltaproteobacteria	Myxococcales	Labilitrichaceae	Labilithrix	0.0130745	±	0.00653723	0.00871631	±	0.00754854	0.0261489	±	0.0235703	0.0174326	±	0.00998578	0.00653723	±	0.00653723	0.00653723	±	0.00653723	0.00653723	±	0.00653723	0.0174326	±	0.0164517	0.00217908	±	0.00377427	0.0348652	±	0.0210143	0.0152535	±	0.0264199	0.00871631	±	0.0150971	0.0239698	±	0.0264199	0.0305071	±	0.0264199	0.0152535	±
OTU872	Proteobacteria	Alphaproteobacteria	Rhodospirillales	Rhodospirillales_unclassified	Rhodospirillales_unclassified	0.00871631	±	0.00754854	0.00435815	±	0.00754854	0.0217908	±	0.0136083	0.00871631	±	0.00754854	0.0217908	±	0.0150971	0.028328	±	0.00754854	0.0196117	±	0.0226456	0.0130745	±	0.00653723	0.028328	±	0.0188714	0.0108954	±	0.0136083	0.0239698	±	0.00998578	0.0196117	±	0.0113228	0.0108954	±	0.0136083	0.00653723	±	0.00653723	0.0108954	±
OTU1164	Actinobacteria	Actinobacteria	Actinomycetales	Pseudonocardiaceae	Actinomycetospora	0.028328	±	0.0264199	0.0326861	±	0.0196117	0.0239698	±	0.00754854	0.0217908	±	0.0164517	0.0130745	±	0.00653723	0.0174326	±	0.0150971	0.0239698	±	0.00377427	0.0305071	±	0.00377427	0.0130745	±	0.00653723	0.00217908	±	0.00377427	0.0152535	±	0.0136083	0.0108954	±	0.00377427	0.00653723	±	0.00653723	0.00435815	±	0.00754854	0.0152535	±
OTU599	Planctomycetes	Planctomycetia	Planctomycetales	Planctomycetaceae	Planctopirus	0.00217908	±	0.00377427	0	±	0	0.00435815	±	0.00754854	0	±	0	0.0152535	±	0.0164517	0.028328	±	0.00998578	0.0108954	±	0.00998578	0.0196117	±	0.0172959	0.0261489	±	0.0196117	0.00871631	±	0.00998578	0.00653723	±	0.00653723	0.00653723	±	0.00653723	0.0217908	±	0.0199716	0.0261489	±	0.0345918	0.0152535	±
OTU9159	Bacteria_unclassified	Bacteria_unclassified	Bacteria_unclassified	Bacteria_unclassified	Bacteria_unclassified	0.0108954	±	0.00377427	0.0261489	±	0.0397644	0.0239698	±	0.00998578	0.00871631	±	0.00754854	0.0217908	±	0.0164517	0.0152535	±	0.0164517	0.0217908	±	0.022958	0.0152535	±	0.00377427	0.0130745	±	0.00653723	0.0196117	±	0.0172959	0.00217908	±	0.00377427	0.00871631	±	0.00754854	0.0239698	±	0.00998578	0.00653723	±	0.00653723	0.0108954	±
OTU1801	Proteobacteria	Alphaproteobacteria	Rhodobacterales	Rhodobacteraceae	Rubellimicrobium	0.00871631	±	0.0150971	0.0152535	±	0.0210143	0.0108954	±	0.0188714	0.0196117	±	0.0196117	0.0174326	±	0.00754854	0.0239698	±	0.00998578	0.0174326	±	0.0136083	0.0326861	±	0	0.0239698	±	0.0150971	0.00871631	±	0.00998578	0.00653723	±	0.00653723	0.0130745	±	0.0113228	0.0217908	±	0.0136083	0.0130745	±	0.0113228	0.0108954	±
OTU683	Bacteroidetes	Cytophagia	Cytophagales	Chryseolinea	Chryseolinea_unclassified	0.0130745	±	0.0113228	0.00653723	±	0.00653723	0.00217908	±	0.00377427	0.00435815	±	0.00754854	0.00435815	±	0.00754854	0.00653723	±	0.0113228	0.0130745	±	0.00653723	0	±	0	0.0130745	±	0.0113228	0.0370443	±	0.0210143	0.0348652	±	0.044498	0.0130745	±	0.00653723	0.0196117	±	0.00653723	0.0196117	±	0.0130745	0.0217908	±
OTU583	Acidobacteria	Acidobacteria_Gp1	Acidobacteria_Gp1_unclassified	Acidobacteria_Gp1_unclassified	Acidobacteria_Gp1_unclassified	0.00653723	±	0.00653723	0	±	0	0.00653723	±	0.00653723	0.00217908	±	0.00377427	0.0152535	±	0.0150971	0.0326861	±	0.0326861	0.0130745	±	0.0130745	0.00653723	±	0.0113228	0.0174326	±	0.00998578	0.00653723	±	1.0623e-18	0.0479397	±	0.0308937	0.0108954	±	0.00998578	0.0108954	±	0.00998578	0.0152535	±	0.00998578	0.0108954	±
OTU812	Proteobacteria	Deltaproteobacteria	Myxococcales	Myxococcales_unclassified	Myxococcales_unclassified	0.0130745	±	0.00653723	0.00871631	±	0.0150971	0.00435815	±	0.00377427	0.0196117	±	0.0113228	0.056656	±	0.00998578	0.0108954	±	0.0136083	0.0239698	±	0.00377427	0.0348652	±	0.0136083	0.0239698	±	0.0308937	0.0152535	±	0.00377427	0.0108954	±	0.0136083	0.0130745	±	0.0172959	0.00435815	±	0.00754854	0.0130745	±	2.12459e-18	0.0217908	±
OTU4686	Actinobacteria	Actinobacteria	Actinomycetales	Promicromonosporaceae	Cellulosimicrobium	0.0152535	±	0.00998578	0.0370443	±	0.0150971	0.0305071	±	0.0264199	0.0130745	±	0.00653723	0.00871631	±	0.00998578	0.0174326	±	0.0188714	0.00435815	±	0.00377427	0.0239698	±	0.022958	0.0174326	±	0.0247496	0.00217908	±	0.00377427	0.0130745	±	2.12459e-18	0.0152535	±	0.0164517	0.0392234	±	0.0172959	0.0152535	±	0.0164517	0.0174326	±
OTU498	Actinobacteria	Actinobacteria	Actinobacteria_unclassified	Actinobacteria_unclassified	Actinobacteria_unclassified	0.00653723	±	0.0113228	0.00435815	±	0.00377427	0.00871631	±	0.00377427	0.00871631	±	0.00998578	0.0130745	±	0.00653723	0.0348652	±	0.0136083	0.0305071	±	0.0164517	0.0501188	±	0.00998578	0.0174326	±	0.0164517	0.0130745	±	0.0130745	0.0239698	±	0.0210143	0.0174326	±	0.0164517	0.0196117	±	0.0196117	0.0174326	±	0.0150971	0.0174326	±
OTU736	Acidobacteria	Acidobacteria_Gp10	Gp10	Gp10_unclassified	Gp10_unclassified	0.0152535	±	0.0210143	0.00217908	±	0.00377427	0.00217908	±	0.00377427	0.0196117	±	0.00653723	0.0130745	±	2.12459e-18	0.028328	±	0.0210143	0.0217908	±	0.0199716	0.0217908	±	0.00998578	0.0217908	±	0.00754854	0.0217908	±	0.0210143	0.0217908	±	0.00377427	0.00435815	±	0.00754854	0.0239698	±	0.00377427	0.0239698	±	0.0164517	0.00871631	±
OTU483	Armatimonadetes	Armatimonadetes_gp5	Armatimonadetes_gp5_unclassified	Armatimonadetes_gp5_unclassified	Armatimonadetes_gp5_unclassified	0.00871631	±	0.00998578	0.0217908	±	0.022958	0.00653723	±	0.00653723	0.0217908	±	0.0322474	0.0152535	±	0.0136083	0.0174326	±	0.0199716	0.0130745	±	0.00653723	0.0239698	±	0.00377427	0.00435815	±	0.00754854	0.0196117	±	0.00653723	0.0174326	±	0.00998578	0.0217908	±	0.0164517	0.00435815	±	0.00754854	0.0130745	±	0.0172959	0.0108954	±
OTU571	Bacteria_unclassified	Bacteria_unclassified	Bacteria_unclassified	Bacteria_unclassified	Bacteria_unclassified	0.0108954	±	0.0136083	0.0348652	±	0.0335465	0.00435815	±	0.00754854	0.0261489	±	0.0226456	0.0196117	±	0.0113228	0.0152535	±	0.00998578	0.0348652	±	0.0272167	0.0152535	±	0.00754854	0.0239698	±	0.0264199	0.0174326	±	0.0164517	0.0130745	±	0.0130745	0.0305071	±	0.0164517	0.0108954	±	0.00377427	0.00871631	±	0.00377427	0.00653723	±
OTU1117	Firmicutes	Bacilli	Bacillales	Thermoactinomycetaceae_2	Planifilum	0.0239698	±	0.0199716	0.0174326	±	0.0188714	0.0152535	±	0.00377427	0.0130745	±	0.0172959	0.0239698	±	0.00998578	0.0130745	±	0.00653723	0.0196117	±	0.0235703	0.0239698	±	0.0164517	0.0152535	±	0.0136083	0.00871631	±	0.00998578	0.0108954	±	0.00377427	0.0108954	±	0.0136083	0.0130745	±	0.00653723	0.0217908	±	0.0150971	0.0261489	±
OTU1030	Bacteroidetes	Cytophagia	Cytophagales	Cytophagaceae	Hymenobacter	0.0414025	±	0.0188714	0.0217908	±	0.0136083	0.0457606	±	0.0284951	0.0305071	±	0.022958	0.0152535	±	0.0136083	0.0326861	±	0.0299573	0.0196117	±	0.0196117	0.0130745	±	0.0172959	0.00217908	±	0.00377427	0.0152535	±	0.0210143	0.0196117	±	0.0113228	0.0174326	±	0.00754854	0.00217908	±	0.00377427	0.0196117	±	0.0172959	0.00871631	±
OTU818	Chloroflexi	Caldilineae	Caldilineales	Caldilineaceae	Litorilinea	0.00653723	±	1.0623e-18	0.0108954	±	0.00998578	0.0174326	±	0.0136083	0.0305071	±	0.0308937	0.0174326	±	0.0199716	0.0261489	±	0.0196117	0.0196117	±	0.0130745	0.0261489	±	0.0130745	0.0174326	±	0.0136083	0.0152535	±	0.00998578	0.00217908	±	0.00377427	0.0130745	±	0.0130745	0.0174326	±	0.00754854	0.0174326	±	0.0199716	0.0130745	±
OTU486	Chloroflexi	Anaerolineae	Anaerolineales	Anaerolineaceae	Anaerolineaceae_unclassified	0.0196117	±	0.0172959	0.0392234	±	0.0226456	0.0370443	±	0.029478	0.00217908	±	0.00377427	0.00871631	±	0.00998578	0.0196117	±	0.0235703	0.0174326	±	0.0150971	0.00217908	±	0.00377427	0.00653723	±	0.00653723	0.0522978	±	0.0518877	0.00653723	±	0.0113228	0.028328	±	0.0136083	0.0174326	±	0.00998578	0.00653723	±	0.00653723	0.00217908	±
OTU1162	Acidobacteria	Acidobacteria_Gp6	Gp6	Gp6_unclassified	Gp6_unclassified	0.0239698	±	0.0301942	0.00653723	±	0.00653723	0.0196117	±	0	0.0261489	±	0.0299573	0.0174326	±	0.00998578	0.0305071	±	0.0420285	0.0108954	±	0.00377427	0.0196117	±	0.0172959	0.0239698	±	0.0150971	0.00871631	±	0.00998578	0.0261489	±	0.00653723	0.00653723	±	1.0623e-18	0.0108954	±	0.00754854	0.0174326	±	0.00998578	0.0196117	±
OTU1764	Firmicutes	Bacilli	Bacillales	Alicyclobacillaceae	Tumebacillus	0.0174326	±	0.0136083	0.00435815	±	0.00754854	0.00653723	±	0.00653723	0.00871631	±	0.00998578	0.0196117	±	0.0113228	0.028328	±	0.00377427	0.0152535	±	0.0210143	0.028328	±	0.0272167	0.0130745	±	0.0113228	0.0261489	±	0.0172959	0.0130745	±	0.00653723	0.0108954	±	0.00998578	0.0217908	±	0.0199716	0.0130745	±	0.0130745	0.00653723	±
OTU902	Bacteria_unclassified	Bacteria_unclassified	Bacteria_unclassified	Bacteria_unclassified	Bacteria_unclassified	0.0174326	±	0.0136083	0.00435815	±	0.00754854	0.00653723	±	0.00653723	0.0130745	±	0.0172959	0.0196117	±	0.00653723	0.0174326	±	0.00754854	0.00653723	±	0.0113228	0.00653723	±	0.00653723	0.0239698	±	0.0164517	0.0174326	±	0.00998578	0.0348652	±	0.00377427	0.0108954	±	0.0136083	0.0108954	±	0.0136083	0.0130745	±	0.00653723	0.0108954	±
OTU754	Bacteria_unclassified	Bacteria_unclassified	Bacteria_unclassified	Bacteria_unclassified	Bacteria_unclassified	0.00435815	±	0.00377427	0.0261489	±	4.24919e-18	0.0108954	±	0.0136083	0.0392234	±	0.0363978	0.0130745	±	0.0172959	0.0108954	±	0.00998578	0.0261489	±	0.0226456	0.00435815	±	0.00754854	0.0196117	±	0.00653723	0.0392234	±	0.0235703	0.0130745	±	0.0113228	0.0239698	±	0.0188714	0.0174326	±	0.00754854	0.00217908	±	0.00377427	0.0130745	±
OTU732	Proteobacteria	Deltaproteobacteria	Myxococcales	Phaselicystidaceae	Phaselicystis	0.00653723	±	0.00653723	0.00435815	±	0.00377427	0.00871631	±	0.00377427	0.0108954	±	0.00998578	0.0174326	±	0.0247496	0.00653723	±	0.0113228	0.0239698	±	0.0210143	0.0217908	±	0.0150971	0.0217908	±	0.0136083	0.0130745	±	0.0130745	0.028328	±	0.0199716	0.0152535	±	0.00754854	0.00435815	±	0.00377427	0.0174326	±	0.00998578	0.00653723	±
OTU820	Bacteroidetes	Sphingobacteriia	Sphingobacteriales	Chitinophagaceae	Flavisolibacter	0.0392234	±	0.0284951	0.0435815	±	0.00998578	0.0392234	±	0.0345918	0.0130745	±	0.0113228	0.0196117	±	0.0284951	0.0152535	±	0.0210143	0.00871631	±	0.00754854	0.00653723	±	0.0113228	0.00653723	±	0.00653723	0.0130745	±	0.0172959	0.00435815	±	0.00377427	0.0130745	±	0.0113228	0.0130745	±	0.0130745	0.00435815	±	0.00377427	0.0174326	±
OTU895	Proteobacteria	Alphaproteobacteria	Rhizobiales	Methylocystaceae	Methylocystaceae_unclassified	0.0174326	±	0.0164517	0.00435815	±	0.00754854	0	±	0	0.00217908	±	0.00377427	0.0326861	±	0.0397644	0.0174326	±	0.0301942	0.00653723	±	0.0113228	0.028328	±	0.043527	0.0392234	±	0.0392234	0.0152535	±	0.0150971	0.0326861	±	0.0284951	0.00217908	±	0.00377427	0.00435815	±	0.00754854	0	±	0	0.028328	±
OTU566	Proteobacteria	Alphaproteobacteria	Sneathiellales	Sneathiellaceae	Sneathiellaceae_unclassified	0.0152535	±	0.00754854	0.0130745	±	0.0226456	0.00653723	±	0.00653723	0.0130745	±	0.00653723	0.00435815	±	0.00754854	0.0217908	±	0.00998578	0.0196117	±	0.0130745	0.00871631	±	0.00754854	0.0239698	±	0.0247496	0.0130745	±	0.0172959	0.0239698	±	0.0264199	0.00653723	±	0.00653723	0.0261489	±	4.24919e-18	0.0152535	±	0.00998578	0.0174326	±
OTU3064	Proteobacteria	Alphaproteobacteria	Sphingomonadales	Sphingomonadaceae	Sphingomonas	0.00871631	±	0.00998578	0.00217908	±	0.00377427	0	±	0	0.00435815	±	0.00754854	0.00435815	±	0.00754854	0.00435815	±	0.00377427	0.00653723	±	0.00653723	0.00435815	±	0.00377427	0.00653723	±	0.0113228	0	±	0	0.00435815	±	0.00377427	0.00653723	±	0.0113228	0.0239698	±	0.0164517	0.00653723	±	0.00653723	0.0130745	±
OTU1418	Firmicutes	Bacilli	Bacillales	Planococcaceae	Planococcaceae_unclassified	0.0217908	±	0.0150971	0.00871631	±	0.00377427	0.0261489	±	0.0113228	0.0239698	±	0.0210143	0.0152535	±	0.0136083	0.0174326	±	0.00377427	0.0196117	±	0.00653723	0.0326861	±	0.0299573	0.0174326	±	0.00998578	0.0239698	±	0.00754854	0.0108954	±	0.0136083	0.0130745	±	0.00653723	0.00871631	±	0.00998578	0.0196117	±	0.0130745	0.00871631	±
OTU816	Proteobacteria	Deltaproteobacteria	Deltaproteobacteria_unclassified	Deltaproteobacteria_unclassified	Deltaproteobacteria_unclassified	0.00871631	±	0.00377427	0	±	0	0.00217908	±	0.00377427	0.00653723	±	0.00653723	0.00653723	±	0.0113228	0.0108954	±	0.00377427	0.0261489	±	0.0172959	0.0108954	±	0.00998578	0.0370443	±	0.0329033	0.0130745	±	0.00653723	0.028328	±	0.0164517	0.0196117	±	0.0130745	0.00871631	±	0.00754854	0.00871631	±	0.00754854	0.0261489	±
OTU869	Proteobacteria	Alphaproteobacteria	Rhizobiales	Xanthobacteraceae	Labrys	0.0152535	±	0.00998578	0.00217908	±	0.00377427	0.00871631	±	0.00754854	0.0196117	±	0.0235703	0.0130745	±	0.00653723	0.0174326	±	0.0150971	0.00653723	±	0.00653723	0.0152535	±	0.00377427	0.0108954	±	0.00754854	0.0174326	±	0.00377427	0.0174326	±	0.00998578	0.0217908	±	0.0164517	0.0130745	±	0.0113228	0.00653723	±	0.00653723	0.0130745	±
OTU1685	Bacteria_unclassified	Bacteria_unclassified	Bacteria_unclassified	Bacteria_unclassified	Bacteria_unclassified	0.0217908	±	0.0136083	0.00653723	±	0.00653723	0.0130745	±	0.0226456	0.0261489	±	0.00653723	0.0348652	±	0.00754854	0.0108954	±	0.0188714	0.0217908	±	0.0136083	0.0217908	±	0.00377427	0.0239698	±	0.00377427	0.0130745	±	0.0172959	0.0196117	±	0.00653723	0.0152535	±	0.0150971	0.0130745	±	0.0130745	0.0152535	±	0.00998578	0.0174326	±
OTU1051	Gemmatimonadetes	Gemmatimonadetes	Gemmatimonadales	Gemmatimonadaceae	Gemmatimonas	0.0414025	±	0.0164517	0.0414025	±	0.0264199	0.0501188	±	0.0272167	0.0414025	±	0.0335465	0	±	0	0.0152535	±	0.0164517	0.0108954	±	0.00998578	0.0217908	±	0.0210143	0	±	0	0.00871631	±	0.00377427	0.00871631	±	0.00377427	0.0196117	±	0.0113228	0.00871631	±	0.0150971	0.00217908	±	0.00377427	0.0239698	±
OTU590	Firmicutes	Bacilli	Bacillales	Bacillales_unclassified	Bacillales_unclassified	0.0392234	±	0.0284951	0.0152535	±	0.00377427	0.0239698	±	0.00998578	0.0130745	±	0.0130745	0.028328	±	0.022958	0.0196117	±	0.0172959	0.00653723	±	0.00653723	0.0152535	±	0.00754854	0.0108954	±	0.00754854	0.00217908	±	0.00377427	0.00435815	±	0.00754854	0.0196117	±	0.00653723	0.0130745	±	0.00653723	0.0152535	±	0.0136083	0.0108954	±
OTU521	Verrucomicrobia	Subdivision3	Subdivision3_unclassified	Subdivision3_unclassified	Subdivision3_unclassified	0.0152535	±	0.0264199	0.0370443	±	0.0136083	0.0174326	±	0.00998578	0.0217908	±	0.0272167	0.00871631	±	0.00754854	0.0239698	±	0.00998578	0.0108954	±	0.00998578	0.0108954	±	0.00377427	0.0261489	±	0.0226456	0.0130745	±	0.0130745	0.0196117	±	0.0196117	0.0239698	±	0.00377427	0.00435815	±	0.00754854	0.0196117	±	0.0172959	0.0261489	±
OTU898	Acidobacteria	Acidobacteria_Gp10	Gp10	Gp10_unclassified	Gp10_unclassified	0.0392234	±	0.0397644	0.0130745	±	0.0113228	0.0239698	±	0.0136083	0.0370443	±	0.0136083	0.0108954	±	0.00998578	0.0196117	±	0.0130745	0.00217908	±	0.00377427	0.00871631	±	0.0150971	0.0152535	±	0.00998578	0.0174326	±	0.0164517	0.00653723	±	0.00653723	0.028328	±	0.00377427	0.00217908	±	0.00377427	0.0174326	±	0.0199716	0.00435815	±
OTU917	Bacteroidetes	Sphingobacteriia	Sphingobacteriales	Sphingobacteriaceae	Pedobacter	0.0326861	±	0.0196117	0.0174326	±	0.00998578	0.00871631	±	0.00754854	0.0261489	±	0.00653723	0.00871631	±	0.00998578	0.00871631	±	0.00754854	0.00217908	±	0.00377427	0.0130745	±	0.00653723	0	±	0	0.00217908	±	0.00377427	0.0152535	±	0.00377427	0.00871631	±	0.00754854	0.00435815	±	0.00754854	0.00435815	±	0.00754854	0.00871631	±
OTU2009	Proteobacteria	Deltaproteobacteria	Desulfuromonadales	Geobacteraceae	Geobacter	0.00217908	±	0.00377427	0.00653723	±	0.0113228	0.00435815	±	0.00754854	0.00653723	±	1.0623e-18	0.00217908	±	0.00377427	0.00653723	±	0.00653723	0.0130745	±	0.0172959	0.00217908	±	0.00377427	0.00435815	±	0.00754854	0.100238	±	0.129815	0.0828049	±	0.132099	0.00217908	±	0.00377427	0.0108954	±	0.0188714	0.00217908	±	0.00377427	0.00435815	±
OTU12558	Planctomycetes	Planctomycetia	Planctomycetales	Planctomycetaceae	Gemmata	0.0196117	±	0.0130745	0.00871631	±	0.00754854	0.00871631	±	0.00377427	0.0217908	±	0.00754854	0.0217908	±	0.00377427	0.0108954	±	0.00998578	0.0174326	±	0.0136083	0.00653723	±	0.00653723	0.00871631	±	0.00998578	0.0108954	±	0.0136083	0.0108954	±	0.00754854	0.0174326	±	0.0188714	0.00217908	±	0.00377427	0.0261489	±	0.0235703	0.0261489	±
OTU1341	Chloroflexi	Anaerolineae	Anaerolineales	Anaerolineaceae	Anaerolineaceae_unclassified	0.0261489	±	0.0130745	0.0174326	±	0.0150971	0.0174326	±	0.00377427	0.0217908	±	0.0210143	0.0130745	±	0.00653723	0.028328	±	0.0136083	0.0108954	±	0.00998578	0.0108954	±	0.00377427	0.0239698	±	0.00998578	0.0130745	±	2.12459e-18	0.0108954	±	0.0136083	0.0392234	±	0.0113228	0.00435815	±	0.00377427	0.0152535	±	0.0136083	0.00653723	±
OTU621	Proteobacteria	Gammaproteobacteria	Chromatiales	Chromatiales_unclassified	Chromatiales_unclassified	0.028328	±	0.0383047	0.0239698	±	0.0247496	0.0196117	±	0.0113228	0.0108954	±	0.00998578	0.0152535	±	0.0210143	0.0261489	±	0.0284951	0.00653723	±	0.00653723	0.028328	±	0.00377427	0.0108954	±	0.0188714	0.0130745	±	0.0226456	0.0174326	±	0.0150971	0.00435815	±	0.00754854	0.0305071	±	0.0420285	0.0152535	±	0.0136083	0.00653723	±
OTU1242	Chloroflexi	Caldilineae	Caldilineales	Caldilineaceae	Litorilinea	0.0130745	±	2.12459e-18	0.0130745	±	0.0130745	0.00435815	±	0.00377427	0	±	0	0.028328	±	0.0210143	0.0174326	±	0.0164517	0.0479397	±	0.0394045	0.0108954	±	0.00754854	0.028328	±	0.0264199	0.00435815	±	0.00754854	0.0108954	±	0.00754854	0.0152535	±	0.00377427	0.00653723	±	0.00653723	0.00871631	±	0.00377427	0.00871631	±
OTU2475	Bacteroidetes	Sphingobacteriia	Sphingobacteriales	Chitinophagaceae	Chitinophagaceae_unclassified	0.00217908	±	0.00377427	0.0108954	±	0.00998578	0.00435815	±	0.00377427	0.0130745	±	0.0113228	0.0174326	±	0.00754854	0.0130745	±	0.0130745	0.0174326	±	0.0164517	0.028328	±	0.0150971	0.0196117	±	0.00653723	0.028328	±	0.0335465	0.0174326	±	0.0188714	0.0108954	±	0.00377427	0.00871631	±	0.00377427	0.0174326	±	0.00754854	0.0130745	±
OTU876	Chloroflexi	Chloroflexia	Kallotenuales	Kallotenuaceae	Kallotenue	0.0217908	±	0.00754854	0.0174326	±	0.0247496	0.00435815	±	0.00754854	0.0196117	±	0.0172959	0.0174326	±	0.0136083	0.028328	±	0.00998578	0.0305071	±	0.00754854	0.0239698	±	0.0247496	0.0174326	±	0.0199716	0.0108954	±	0.00754854	0.0108954	±	0.00754854	0.00871631	±	0.00998578	0.00871631	±	0.00998578	0.0196117	±	0.0172959	0.0239698	±
OTU10798	Proteobacteria	Gammaproteobacteria	Xanthomonadales	Sinobacteraceae	Steroidobacter	0.00871631	±	0.00377427	0.00435815	±	0.00377427	0.00653723	±	1.0623e-18	0.00435815	±	0.00377427	0.0130745	±	0.0113228	0.0108954	±	0.00377427	0.0174326	±	0.0136083	0.0435815	±	0.0371723	0.0370443	±	0.0264199	0.0130745	±	0.00653723	0.00653723	±	0.0113228	0.0152535	±	0.0264199	0.0261489	±	0.0261489	0.0130745	±	0.0130745	0.0239698	±
OTU4869	Bacteria_unclassified	Bacteria_unclassified	Bacteria_unclassified	Bacteria_unclassified	Bacteria_unclassified	0.0108954	±	0.0136083	0.0326861	±	0.0196117	0.0130745	±	0.0113228	0.0108954	±	0.00377427	0.0152535	±	0.00998578	0.0152535	±	0.00998578	0.0261489	±	0.0235703	0.0261489	±	0.00653723	0.0174326	±	0.00377427	0.0130745	±	0.00653723	0.00871631	±	0.00998578	0.0196117	±	0.0113228	0.00653723	±	0.00653723	0.0130745	±	0.0226456	0.0239698	±
OTU595	Armatimonadetes	Chthonomonadetes	Chthonomonadales	Chthonomonadaceae	Chthonomonas/Armatimonadetes_gp3	0.0196117	±	0.0113228	0.00871631	±	0.00998578	0.0305071	±	0.0210143	0.0108954	±	0.0188714	0.0217908	±	0.0210143	0.0196117	±	0	0.0108954	±	0.0136083	0.0130745	±	0.00653723	0.0152535	±	0.0150971	0.028328	±	0.0322474	0.00871631	±	0.00377427	0.0152535	±	0.00998578	0.00217908	±	0.00377427	0.00871631	±	0.00377427	0.00871631	±
OTU1452	Firmicutes	Clostridia	Clostridiales	Lachnospiraceae	Clostridium_XlVa	0.0152535	±	0.0164517	0.0152535	±	0.0210143	0.00435815	±	0.00754854	0.0261489	±	0.0196117	0.00871631	±	0.0150971	0.0152535	±	0.00998578	0.0130745	±	0.0130745	0.0130745	±	0.0130745	0.00871631	±	0.00998578	0.00435815	±	0.00754854	0.00871631	±	0.00998578	0.00217908	±	0.00377427	0.0130745	±	0.00653723	0.0217908	±	0.0322474	0.0196117	±
OTU11853	Proteobacteria	Gammaproteobacteria	Gammaproteobacteria_unclassified	Gammaproteobacteria_unclassified	Gammaproteobacteria_unclassified	0.0501188	±	0.0164517	0.0370443	±	0.0247496	0.0305071	±	0.0136083	0.0348652	±	0.00754854	0.00217908	±	0.00377427	0.00871631	±	0.00754854	0.00217908	±	0.00377427	0.0152535	±	0.0164517	0.0130745	±	0.0113228	0.0152535	±	0.00377427	0.00217908	±	0.00377427	0.0152535	±	0.00754854	0.0152535	±	0.0136083	0.0152535	±	0.0136083	0.0152535	±
OTU887	Bacteria_unclassified	Bacteria_unclassified	Bacteria_unclassified	Bacteria_unclassified	Bacteria_unclassified	0.0152535	±	0.00377427	0.0196117	±	0.00653723	0.0370443	±	0.0360043	0.0261489	±	0.0235703	0.00435815	±	0.00377427	0.0174326	±	0.0136083	0.00435815	±	0.00754854	0	±	0	0.0239698	±	0.0308937	0.0174326	±	0.0247496	0.00435815	±	0.00754854	0.00653723	±	0.00653723	0.0152535	±	0.00754854	0.00435815	±	0.00377427	0.0152535	±
OTU8608	Proteobacteria	Deltaproteobacteria	Myxococcales	Kofleriaceae	Kofleria	0.0217908	±	0.022958	0.0217908	±	0.0199716	0.0108954	±	0.00377427	0.0348652	±	0.00998578	0.0326861	±	0.0235703	0.0108954	±	0.0188714	0.0174326	±	0.0188714	0.0152535	±	0.0136083	0.0174326	±	0.00998578	0.028328	±	0.0136083	0.00435815	±	0.00754854	0.0261489	±	0.00653723	0.00653723	±	0.00653723	0.00653723	±	0.00653723	0.00435815	±
OTU7492	Chloroflexi	Anaerolineae	Anaerolineales	Anaerolineaceae	Anaerolineaceae_unclassified	0.0108954	±	0.0136083	0.0108954	±	0.00998578	0.0305071	±	0.0264199	0.0130745	±	0.00653723	0.0174326	±	0.00998578	0.0108954	±	0.0136083	0.0108954	±	0.00998578	0.0108954	±	0.00754854	0.0196117	±	0.0172959	0.00871631	±	0.00754854	0.0152535	±	0.0136083	0.0108954	±	0.00754854	0.0196117	±	0	0.0130745	±	0.00653723	0.00871631	±
OTU935	Actinobacteria	Actinobacteria	Actinomycetales	Nocardioidaceae	Kribbella	0.0152535	±	0.0136083	0.0217908	±	0.0210143	0.028328	±	0.0210143	0.0392234	±	0.0172959	0.00435815	±	0.00754854	0.0152535	±	0.0136083	0.0196117	±	0.0172959	0.0152535	±	0.0136083	0.00217908	±	0.00377427	0.0130745	±	0.0172959	0.0108954	±	0.00998578	0.00653723	±	1.0623e-18	0.00871631	±	0.00998578	0.00217908	±	0.00377427	0.0239698	±
OTU1003	Acidobacteria	Acidobacteria_Gp7	Gp7	Gp7_unclassified	Gp7_unclassified	0.0152535	±	0.00998578	0.0239698	±	0.0150971	0.00871631	±	0.00377427	0.0130745	±	0.0113228	0.00653723	±	0.00653723	0.00435815	±	0.00754854	0.0217908	±	0.0272167	0.0239698	±	0.0164517	0.0108954	±	0.00998578	0.0152535	±	0.00377427	0.0174326	±	0.0247496	0.0217908	±	0.0164517	0.0108954	±	0.00377427	0.0152535	±	0.0136083	0.00871631	±
OTU4454	Proteobacteria	Betaproteobacteria	Betaproteobacteria_unclassified	Betaproteobacteria_unclassified	Betaproteobacteria_unclassified	0.0196117	±	0.00653723	0.0130745	±	0.0130745	0.0217908	±	0.00998578	0.0326861	±	0.0130745	0.00653723	±	0.00653723	0.0174326	±	0.00998578	0.0174326	±	0.0136083	0.00435815	±	0.00377427	0.00217908	±	0.00377427	0.0152535	±	0.00998578	0.0239698	±	0.00998578	0.0152535	±	0.00998578	0.0108954	±	0.00998578	0.0108954	±	0.0136083	0.00871631	±
OTU1595	Chloroflexi	Thermomicrobia	Sphaerobacterales	Sphaerobacteraceae	Sphaerobacteraceae_unclassified	0.0217908	±	0.0210143	0.028328	±	0.022958	0.028328	±	0.0136083	0.0217908	±	0.00377427	0.0217908	±	0.00754854	0.0152535	±	0.00377427	0.00871631	±	0.00754854	0.0108954	±	0.00998578	0.0174326	±	0.0136083	0.00871631	±	0.00754854	0.0152535	±	0.00998578	0.0239698	±	0.0136083	0.00435815	±	0.00377427	0.00435815	±	0.00377427	0.00871631	±
OTU3051	Acidobacteria	Acidobacteria_Gp3	Gp3	Gp3_unclassified	Gp3_unclassified	0.0108954	±	0.0188714	0.00653723	±	0.00653723	0.0217908	±	0.0210143	0.0108954	±	0.00754854	0.0217908	±	0.00998578	0.0174326	±	0.00377427	0.0326861	±	0.00653723	0.0108954	±	0.00998578	0.0239698	±	0.0136083	0.0217908	±	0.00377427	0.0174326	±	0.0150971	0.0196117	±	0.0196117	0.0174326	±	0.0164517	0.00435815	±	0.00377427	0.00653723	±
OTU550	Firmicutes	Clostridia	Clostridiales	Clostridiaceae_1	Youngiibacter	0.0108954	±	0.00998578	0.0130745	±	0.0172959	0.0152535	±	0.0164517	0.00653723	±	0.00653723	0.0370443	±	0.0322474	0.00871631	±	0.00998578	0.028328	±	0.0335465	0.0130745	±	0.0113228	0.0196117	±	0.0284951	0.0196117	±	0.0284951	0.0130745	±	0.0172959	0.00217908	±	0.00377427	0.0326861	±	0.0261489	0.0239698	±	0.0360043	0.00435815	±
OTU659	Proteobacteria	Deltaproteobacteria	Myxococcales	Kofleriaceae	Kofleria	0.0108954	±	0.00377427	0.0108954	±	0.00377427	0.00435815	±	0.00754854	0.0108954	±	0.00377427	0.0152535	±	0.0164517	0.0130745	±	0.0130745	0.0130745	±	0.0130745	0.00435815	±	0.00754854	0.0108954	±	0.00998578	0.0196117	±	0.0235703	0.0152535	±	0.0164517	0.0196117	±	0.0130745	0.0196117	±	0.0113228	0.00217908	±	0.00377427	0.0130745	±
OTU1090	Gemmatimonadetes	Gemmatimonadetes	Gemmatimonadales	Gemmatimonadaceae	Gemmatimonas	0	±	0	0	±	0	0.00435815	±	0.00754854	0.00435815	±	0.00754854	0.00871631	±	0.00998578	0.0152535	±	0.00377427	0.00653723	±	1.0623e-18	0.0305071	±	0.0301942	0.028328	±	0.0199716	0.0196117	±	0.00653723	0.00653723	±	0.00653723	0.0196117	±	0.0235703	0.0174326	±	0.0136083	0.00871631	±	0.00377427	0.0217908	±
OTU661	Chloroflexi	Anaerolineae	Anaerolineales	Anaerolineaceae	Anaerolineaceae_unclassified	0.00435815	±	0.00754854	0.00653723	±	0.0113228	0.0239698	±	0.0164517	0.0108954	±	0.0136083	0.0108954	±	0.0136083	0.0174326	±	0.0199716	0.0130745	±	0.0172959	0.0108954	±	0.00754854	0.0196117	±	0.0130745	0.0130745	±	0.00653723	0.0196117	±	0.0196117	0.0152535	±	0.0136083	0.0108954	±	0.00998578	0.0152535	±	0.0210143	0.0239698	±
OTU804	Acidobacteria	Acidobacteria_Gp6	Gp6	Gp6_unclassified	Gp6_unclassified	0.0217908	±	0.00998578	0.0239698	±	0.0308937	0.0479397	±	0.0272167	0.0414025	±	0.00754854	0.0108954	±	0.0136083	0.0130745	±	0.0113228	0.0130745	±	0.0113228	0.00871631	±	0.00754854	0.00871631	±	0.0150971	0.00217908	±	0.00377427	0.0108954	±	0.00377427	0.0130745	±	0.00653723	0.00871631	±	0.00998578	0.0152535	±	0.0210143	0.0108954	±
OTU592	Acidobacteria	Acidobacteria_Gp17	Gp17	Gp17_unclassified	Gp17_unclassified	0.0130745	±	0.0226456	0.0217908	±	0.00377427	0.0196117	±	0.00653723	0.0239698	±	0.041517	0.0152535	±	0.00998578	0.0305071	±	0.0371723	0.00653723	±	0.0113228	0.00435815	±	0.00754854	0.0130745	±	0.0172959	0.0130745	±	0.0172959	0.0239698	±	0.0264199	0.00435815	±	0.00754854	0.0152535	±	0.0136083	0.0108954	±	0.0136083	0.0152535	±
OTU7230	Acidobacteria	Acidobacteria_Gp4	Aridibacter	Aridibacter_unclassified	Aridibacter_unclassified	0.00435815	±	0.00377427	0.00435815	±	0.00754854	0.00653723	±	0.00653723	0	±	0	0.0217908	±	0.0322474	0.00871631	±	0.00377427	0.0305071	±	0.0164517	0.0217908	±	0.0199716	0.0108954	±	0.00998578	0.0130745	±	2.12459e-18	0.0457606	±	0.0196117	0.0174326	±	0.00998578	0.00871631	±	0.00998578	0.00435815	±	0.00377427	0.0217908	±
[truncated: 12,667 more rows]
[truncated: 88 more columns]
